# Supplementary material for: Foliar Application of Different Vegetal-Derived Protein Hydrolysates Distinctively Modulates Tomato Root Development and Metabolism
Source: Plants (Basel). 2021 Feb 8;10(2):326. doi: 10.3390/plants10020326 (PMC7914860; doi:10.3390/plants10020326)
Supplement: Supplementary file 1 [file plants-10-00326-s001.zip › plants-1091060 - supplementary proof done.pdf]

**Table S1.** C and N content in the different protein hydrolysates (PHs).

| Protein hydrolysate | C (%) | N (%) | C/N |
|---------------------|-------|-------|-----|
| PH2                 | 18.6  | 5.2   | 3.6 |
| PH3                 | 16.9  | 4.7   | 3.6 |
| PH4                 | 17.6  | 4.9   | 3.6 |
| PH6                 | 17.1  | 3.9   | 4.3 |
| PH10                | 20.0  | 4.9   | 4.1 |

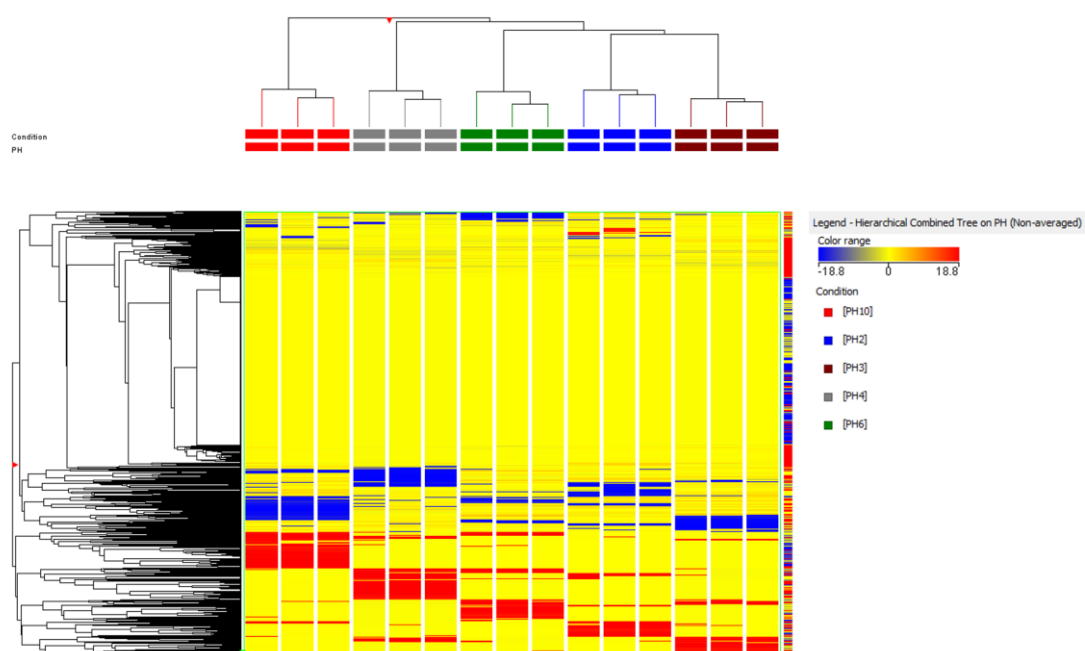

**Figure S1.** Hierarchical cluster analysis carried out from the chemical profile of the different protein hydrolysates; a fold-change heat map was made, and Euclidean distance used for clustering.
