# Supplementary material for: Foliar Application of Different Vegetal-Derived Protein Hydrolysates Distinctively Modulates Tomato Root Development and Metabolism
Source: Plants (Basel). 2021 Feb 8;10(2):326. doi: 10.3390/plants10020326 (PMC7914860; doi:10.3390/plants10020326)
Supplement: Supplementary file 1 [file plants-10-00326-s001.zip › Supplementary table S2.xlsx]

## Sheet: Table S2
Compound	PH10-r001	PH10-r002	PH10-r003	PH2-r001	PH2-r002	PH2-r003	PH3-r001	PH3-r002	PH3-r003	PH4-r001	PH4-r002	PH4-r003	PH6-r001	PH6-r002	PH6-r003	Alignment Value	Annotations	CompositeSpectrum	Retention Time
&alpha;,&omega;-9iZ/i-octadecenedioate	1	1	1	1	328125	333147	1	1	1	1	1	1	1	1	1	&alpha;,&omega;-9iZ/i-octadecenedioate	&alpha;,&omega;-9iZ/i-octadecenedioate [ C18 H30 O4, tgt= ]	(335.2031, 2571.855)(295.21265, 11426.59)	11.3368
&alpha;-3',4'-anhydrovinblastine	1	1	1	101501	106335	100591	1	1	1	1	175108	1	1	1	1	&alpha;-3',4'-anhydrovinblastine	&alpha;-3',4'-anhydrovinblastine [ C46 H58 N4 O8, tgt=45.08, overall=45.08 ]	(823.4502, 483.225)(797.43634, 3250.9534)(796.94385, 3835.05)(796.4684, 337.18)	7.21545
&alpha;-chaconine	308683	319944	316992	1	1	1	1	1	1	1	1	1	1	1	1	&alpha;-chaconine	&alpha;-chaconine [ C45 H74 N O14, tgt=16.92, overall=16.92 ]	(857.4793, 15356.323)(858.48175, 4504.9097)	8.416
&alpha;-cryptoxanthin	1	1	1	1	1	1	121567	96901	120136	1	1	1	1	105999	1	&alpha;-cryptoxanthin	&alpha;-cryptoxanthin [ C40 H56 O, tgt= ]	(552.4383, 3785.8467)(559.4467, 3239.9976)(552.4406, 3753.1)(581.45795, 2710.2632)	21.1446
&alpha;-eleostearate	553562	1458059	1017108	4874325	4958712	5460669	944515	985092	948512	1	1	1	437726	434888	440306	&alpha;-eleostearate	&alpha;-eleostearate [ C18 H29 O2, tgt=66.05, overall=66.05 ]	(279.2196, 5947.326)(280.2228, 655.64)(263.22504, 1864.6234)(262.93875, 1911.9344)(263.2272, 2269.38)(296.44696, 42786.23)(297.2497, 4962.6553)(279.24423, 41896.777)(280.83633, 10936.888)(281.00525, 12929.75)(281.2565, 4983.89)	13.1692
&alpha;-iminosuccinate	1191818	1262937	1222690	1311961	1265909	1259501	1334507	1347317	1386686	1182252	1168056	1150143	1146612	1150993	1145034	&alpha;-iminosuccinate	&alpha;-iminosuccinate [ C4 H3 N O4, tgt=31.79, overall=31.79 ]	(130.0077, 8411.982)(115.00686, 5098.017)(130.01183, 10115.821)(112.001724, 61834.266)(155.0055, 313.53497)	2.0122
&alpha;-ketol	1	1	1	2159558	2095579	2063807	1	1	1	1	1	1	1	1	1	&alpha;-ketol	&alpha;-ketol [ C18 H31 O4, tgt=17.60, overall=17.60 ]	(295.2136, 1114.3301)(295.23056, 5258.0)(316.2097, 7722.3438)	13.5216
&alpha;-linolenate	553562	1458059	1017108	4874325	4958712	5460669	944515	985092	948512	1	1	1	437726	434888	440306	&alpha;-linolenate	&alpha;-linolenate [ C18 H29 O2, tgt=66.05, overall=66.05 ]	(279.2196, 5947.326)(280.2228, 655.64)(263.22504, 1864.6234)(262.93875, 1911.9344)(263.2272, 2269.38)(296.44696, 42786.23)(297.2497, 4962.6553)(279.24423, 41896.777)(280.83633, 10936.888)(281.00525, 12929.75)(281.2565, 4983.89)	13.1692
&alpha;-L-rhamnopyranose 3-sulfate	1	1	1	1	1	1	103664	97089	99263	73654	74661	1	1	1	1	&alpha;-L-rhamnopyranose 3-sulfate	&alpha;-L-rhamnopyranose 3-sulfate [ C6 H11 O8 S, tgt=40.29, overall=40.29 ]	(249.03491, 1772.884)(266.00568, 7055.486)	1.995
&alpha;-ribazole	1533069	1735299	1504769	1494943	1462228	1485671	172233	187230	199041	1041381	1001191	994436	1836499	1837613	1671415	&alpha;-ribazole	&alpha;-ribazole [ C14 H18 N2 O4, tgt=50.20, overall=50.20 ]	(279.92935, 6217.452)(281.13715, 11864.249)(282.13538, 700.4666)(263.1305, 56865.402)(264.13242, 3510.5361)(265.1417, 130650.38)(296.15515, 6117.682)(304.1325, 1732.98)	2.5816
&alpha;-solanine	1	1	1	373131	390388	398236	3362978	3314653	3221065	1	1	1	1	1	1	&alpha;-solanine	&alpha;-solanine [ C45 H74 N O15, tgt=59.99, overall=59.99 ]	(868.4841, 86408.375)(869.4864, 30615.32)(870.48785, 3450.0364)(850.4961, 17664.73)(851.49854, 4798.6196)	6.46775
&beta;-alanine betaine	1142502	1269798	1256763	1	1	1	1	1	1	1	1	1	1	1	1	&beta;-alanine betaine	&beta;-alanine betaine [ C6H13NO2, tgt= ]	(132.09666, 11970.487)(136.0696, 5090.2866)	2.62867
&beta;-carotene 15,15' epoxide	1	1	1	1	1	1	121567	96901	120136	1	1	1	1	105999	1	&beta;-carotene 15,15' epoxide	&beta;-carotene 15,15' epoxide [ C40 H56 O, tgt= ]	(552.4383, 3785.8467)(559.4467, 3239.9976)(552.4406, 3753.1)(581.45795, 2710.2632)	21.1446
&beta;-chaconine	212313	213248	1	241003	236981	234636	552515	556420	558153	1	1	1	442442	450626	450146	&beta;-chaconine	&beta;-chaconine [ C39 H64 N O10, tgt=13.14, overall=13.14 ]	(690.46796, 30113.297)(691.4707, 6134.64)(690.4721, 19394.986)(691.4748, 3406.8198)(712.42413, 14646.284)(713.42645, 2820.99)	9.96343
&beta;-cryptoxanthin	1	1	1	1	1	1	121567	96901	120136	1	1	1	1	105999	1	&beta;-cryptoxanthin	&beta;-cryptoxanthin [ C40 H56 O, tgt= ]	(552.4383, 3785.8467)(559.4467, 3239.9976)(552.4406, 3753.1)(581.45795, 2710.2632)	21.1446
&beta;-D-gentiobiosyl crocetin	1	1	1	894806	830467	676067	212163	224758	196883	1	274232	272909	1	1	1	&beta;-D-gentiobiosyl crocetin	&beta;-D-gentiobiosyl crocetin [ C32 H43 O14, tgt=43.90, overall=43.90 ]	(656.6486, 13084.374)(657.27814, 3832.5134)(638.285, 868.81665)(657.2704, 8558.427)(651.29553, 6548.0547)	5.561
&beta;-D-glucopyranosyl abscisate	642033	692011	698275	158234	266056	265264	173882	2793752	2716410	312857	282491	300153	1	598008	642349	&beta;-D-glucopyranosyl abscisate	&beta;-D-glucopyranosyl abscisate [ C21 H30 O9, tgt=48.74, overall=48.74 ]	(427.19055, 7049.633)(408.46292, 4395.5156)(432.20468, 9160.25)(445.51724, 116077.4)(447.48804, 42093.703)(449.2482, 6385.94)(427.72308, 28089.764)(427.22266, 7839.833)(431.1731, 2268.7566)	5.617
&beta;-D-glucosyl crocetin	454269	510881	468457	25671064	20130360	9326187	1	1	1	344296	483475	472747	23399716	23485340	22468092	&beta;-D-glucosyl crocetin	&beta;-D-glucosyl crocetin [ C26 H33 O9, tgt=50.43, overall=50.43 ]	(474.2157, 11513.323)(475.21677, 1884.1666)(476.22864, 778.5733)(493.24155, 1578.7333)(507.91476, 22160.812)(508.92383, 3837.0947)(490.9082, 72450.37)(491.91107, 8113.7354)(491.23987, 351.99667)(518.2177, 266.04333)	5.882
&beta;-iD/i-apiofuranosyl-(1-6)-iD/i-glucose	1	1	1	1	1	1	290425	295499	290640	1	1	1	1	1	1	&beta;-iD/i-apiofuranosyl-(1-6)-iD/i-glucose	&beta;-iD/i-apiofuranosyl-(1-6)-iD/i-glucose [ C11 H20 O10, tgt=34.12, overall=34.12 ]	(313.10666, 3873.8665)(297.11252, 4592.39)	2.8
&beta;-ionone	378474	426612	413283	1	1	1	1	1	1	1	1	1	1	1	1	&beta;-ionone	&beta;-ionone [ C13 H20 O, tgt= ]	(217.14653, 45363.996)(218.14813, 1919.0465)	2.6072
&beta;-L-fucose 1-phosphate	299186	318449	308998	441246	441748	421648	487713	485010	495431	359290	363455	359198	331691	331445	323138	&beta;-L-fucose 1-phosphate	&beta;-L-fucose 1-phosphate [ C6 H11 O8 P, tgt=13.54, overall=13.54 ]	(264.06622, 4503.716)(265.00504, 28990.889)(266.00616, 5806.993)	1.997
&beta;-primeverose	1	1	1	1	1	1	290425	295499	290640	1	1	1	1	1	1	&beta;-primeverose	&beta;-primeverose [ C11 H20 O10, tgt=34.12, overall=34.12 ]	(313.10666, 3873.8665)(297.11252, 4592.39)	2.8
&beta;-solanine	318214	329379	315163	1	1	1	1	1	1	714739	664651	638455	1	1	1	&beta;-solanine	&beta;-solanine [ C39 H63 N O11, tgt=17.07, overall=17.07 ]	(703.41113, 11388.874)(704.4138, 1269.6832)(740.49097, 23282.14)(741.49384, 6129.1797)	12.4833
&beta;-tocopherol	1	1	1	1	1	1	1	1	1	344456	355581	376596	1	1	1	&beta;-tocopherol	&beta;-tocopherol [ C28 H48 O2, tgt= ]	(439.36343, 7760.3867)(421.33408, 4876.0703)	15.22
&beta;-tocotrienol	1	1	1	1	1	1	1	1	1	1	1	1	337609	1	325460	&beta;-tocotrienol	&beta;-tocotrienol [ C28 H42 O2, tgt= ]	(433.31433, 14991.346)(416.2883, 1774.9651)	13.7816
&chi;,&chi;-caroten-18-oate	22780216	22726544	22130654	80547	77703	1213684	2128599	2116325	2072408	1050125	1000841	1034557	315546	316574	324406	&chi;,&chi;-caroten-18-oate	&chi;,&chi;-caroten-18-oate [ C40 H45 O2, tgt=15.32, overall=15.32 ]	(558.1883, 27626.156)(559.1045, 3522.235)(563.3487, 1608.03)(544.3458, 518.85)(545.85693, 535.85004)(576.3656, 298.78)(558.5252, 189084.86)(559.56067, 33766.863)(559.35614, 2434.7598)(586.344, 3019.165)(562.82745, 24411.062)(564.3309, 5240.653)	7.893
&Delta;sup9/suptetrahydrocannabinol	1	1	1	1	1	1	2555363	2541164	2537445	898433	906278	911248	1	1	1	&Delta;sup9/suptetrahydrocannabinol	&Delta;sup9/suptetrahydrocannabinol [ C21H30O2, tgt= ]	(315.2391, 5223.555)(297.2296, 22379.074)(298.23227, 1399.7666)(337.22043, 44830.13)(338.2234, 3011.6348)	11.9543
&Delta;sup9/sup-tetrahydrocannabinolate	1	1	1	318469	306431	328189	10160162	10111662	9953015	1	1	869718	1	1	1	&Delta;sup9/sup-tetrahydrocannabinolate	&Delta;sup9/sup-tetrahydrocannabinolate [ C22 H29 O4, tgt=41.10, overall=41.10 ]	(359.21194, 6485.8096)(342.19516, 616.89667)(359.2106, 18055.42)(380.19943, 55156.375)(381.20288, 14671.78)(362.1906, 10976.734)(363.19327, 1435.4501)	4.9416
&delta;-tocotrienol	5043313	5112005	5255959	752137	740217	727439	1	1	1	1	1	1	1	1	1	&delta;-tocotrienol	&delta;-tocotrienol [ C27 H40 O2, tgt=12.34, overall=12.34 ]	(424.3061, 216.55)(401.27173, 163146.67)(402.27396, 21008.102)(398.32202, 26068.465)(399.3249, 2395.475)	8.169
&epsilon;,&epsilon;-carotene-3-diol	1	1	1	1	1	1	121567	96901	120136	1	1	1	1	105999	1	&epsilon;,&epsilon;-carotene-3-diol	&epsilon;,&epsilon;-carotene-3-diol [ C40 H56 O, tgt= ]	(552.4383, 3785.8467)(559.4467, 3239.9976)(552.4406, 3753.1)(581.45795, 2710.2632)	21.1446
&epsilon;-rhodomycinone	1	1	1	1	1	1	1	1	1	841040	863346	876215	1	1	1	&epsilon;-rhodomycinone	&epsilon;-rhodomycinone [ C22 H20 O9, tgt= ]	(433.09378, 30778.781)(434.09647, 2490.3467)	6.9652
&gamma;-chaconine	543799	570593	557094	1	82002	273544	1606473	1597093	1583861	211921	219780	209338	1	1	1	&gamma;-chaconine	&gamma;-chaconine [ C33 H54 N O6, tgt=40.85, overall=40.85 ]	(544.3797, 9217.954)(544.3821, 40051.547)(545.3852, 8646.329)(588.4051, 2108.8438)(589.4068, 507.5)	9.41825
&gamma;-glutamyl-isopropylamide	1	1	925723	1	1	1	1	1	1	1	1	1	1	1	1	&gamma;-glutamyl-isopropylamide	&gamma;-glutamyl-isopropylamide [ C8 H16 N2 O3, tgt=29.33, overall=29.33 ]	(189.1164, 16201.45)(175.1122, 5133.25)	2.58
&gamma;-linolenate	553562	1458059	1017108	4874325	4958712	5460669	944515	985092	948512	1	1	1	437726	434888	440306	&gamma;-linolenate	&gamma;-linolenate [ C18 H29 O2, tgt=66.05, overall=66.05 ]	(279.2196, 5947.326)(280.2228, 655.64)(263.22504, 1864.6234)(262.93875, 1911.9344)(263.2272, 2269.38)(296.44696, 42786.23)(297.2497, 4962.6553)(279.24423, 41896.777)(280.83633, 10936.888)(281.00525, 12929.75)(281.2565, 4983.89)	13.1692
&gamma;-solanine	543799	570593	557094	1	82002	273544	1606473	1597093	1583861	211921	219780	209338	1	1	1	&gamma;-solanine	&gamma;-solanine [ C33 H54 N O6, tgt=40.85, overall=40.85 ]	(544.3797, 9217.954)(544.3821, 40051.547)(545.3852, 8646.329)(588.4051, 2108.8438)(589.4068, 507.5)	9.41825
&gamma;-tocopherol	1	1	1	1	1	1	1	1	1	344456	355581	376596	1	1	1	&gamma;-tocopherol	&gamma;-tocopherol [ C28 H48 O2, tgt= ]	(439.36343, 7760.3867)(421.33408, 4876.0703)	15.22
&gamma;-tocotrienol	1	1	1	1	1	1	1	1	1	1	1	1	337609	1	325460	&gamma;-tocotrienol	&gamma;-tocotrienol [ C28 H42 O2, tgt= ]	(433.31433, 14991.346)(416.2883, 1774.9651)	13.7816
(-)-9&beta;-pimara-7,15-dien-19-al	1	1	1	143126	1	1	1	1	1	1	1	1	1	1	1	(-)-9&beta;-pimara-7,15-dien-19-al	(-)-9&beta;-pimara-7,15-dien-19-al [ C20 H30 O, tgt=45.81, overall=45.81 ]	(309.2098, 8821.06)(292.2124, 319.25)	9.12
(-)-9&beta;-pimara-7,15-diene	319766	360653	330787	1	1	1	1	1	1	1	1	1	1	1	1	(-)-9&beta;-pimara-7,15-diene	(-)-9&beta;-pimara-7,15-diene [ C20 H32, tgt= ]	(295.23553, 21282.799)(296.24646, 684.85333)	13.4055
(-)-curcuquinone	2945378	3200988	2835450	1771934	1694349	1715845	1086309	1096274	1116044	2183624	2363202	2878221	2494750	2537288	2548685	(-)-curcuquinone	(-)-curcuquinone [ C15 H20 O2, tgt=18.93, overall=18.93 ]	(258.67883, 15676.399)(260.1504, 15797.135)(217.14514, 28365.78)(218.14827, 1578.3734)(235.40616, 1583.81)(236.16255, 3846.14)(239.73526, 2034.7441)(232.16411, 23367.041)	2.7638
(-)-dihydrokaempferol	1	1	1	1	1	1	1	1	1	4107353	4194490	4286045	1	1	1	(-)-dihydrokaempferol	(-)-dihydrokaempferol [ C15 H12 O6, tgt= ]	(271.04932, 125649.4)(272.05197, 9997.133)	9.4118
(-)-ephedrine	7782224	7952921	7760494	1	1	1	1	1	1	1	1	1	1	1	1	(-)-ephedrine	(-)-ephedrine [ C10 H15 N O, tgt=68.49, overall=68.49 ]	(148.1065, 111850.35)(149.10927, 5060.067)	4.287
(-)-epicatechin-3-iO/i-gallate	1	1	1	1	1	1	654543	653857	626780	1	1	1	1	1	1	(-)-epicatechin-3-iO/i-gallate	(-)-epicatechin-3-iO/i-gallate [ C22 H18 O10, tgt= ]	(442.11954, 23799.766)(443.12216, 2255.7634)	12.168
(-)-glycinol	1	1	1	1	1	1494283	1	1	1	16047517	16141532	15942973	1	1	1	(-)-glycinol	(-)-glycinol [ C15 H12 O5, tgt= ]	(255.0547, 330717.3)(256.05756, 37128.504)(257.0599, 1386.2201)	7.89243
(-)-heliannuol A	1	1	1	265451	249109	243583	1	1	1	1	1	1	1	1	1	(-)-heliannuol A	(-)-heliannuol A [ C15 H22 O3, tgt=18.93, overall=18.93 ]	(276.14688, 4885.1567)(255.13257, 10689.946)	2.3042
(-)-heliannuol E	8392858	8647739	8580862	1	1	206850	1551536	1602239	1601136	1583305	1568532	1541330	750647	750873	713470	(-)-heliannuol E	(-)-heliannuol E [ C15 H20 O3, tgt= ]	(233.13684, 46982.79)(249.14986, 469.16)(233.64392, 36444.26)(234.14305, 2052.555)(270.1809, 20089.158)(271.18298, 642.91003)(251.16594, 2546.72)(255.87775, 7583.873)(258.13388, 1273.6832)	2.7252
(-)-isopiperitenone	1	959772	951568	1	1	1	1	1	1	1	1	1	1	1	1	(-)-isopiperitenone	(-)-isopiperitenone [ C10 H14 O, tgt= ]	(132.0967, 10475.06)(133.09595, 895.05005)	2.58386
(-)-jasmonoyl-L-isoleucine	703784	733693	720817	869003	805589	810589	1	1	1	725620	721515	731033	631525	637336	632031	(-)-jasmonoyl-L-isoleucine	(-)-jasmonoyl-L-isoleucine [ C18 H28 N O4, tgt=24.49, overall=24.49 ]	(345.52896, 7483.2266)(346.21646, 1997.775)(330.18805, 5199.506)(331.43835, 3292.9336)(332.20242, 18319.812)	2.4478
(-)-maackiain	1	1	1	1	1	1	1	1	1	2859638	2884991	2933708	1	1	1	(-)-maackiain	(-)-maackiain [ C16 H12 O5, tgt= ]	(285.06412, 101108.93)(286.06693, 8111.5034)	8.3818
(-)-medicarpin	1	1	1	1	1	1	1	1	1	1	1	1	1225860	1203696	1209268	(-)-medicarpin	(-)-medicarpin [ C16 H14 O4, tgt= ]	(252.08484, 40955.496)(253.08636, 963.79663)	6.298
(-)-phaseollidin	1	1	1	160497	161964	158772	173788	183346	171356	727715	679752	572218	1	1	1	(-)-phaseollidin	(-)-phaseollidin [ C20 H20 O4, tgt=47.39, overall=47.39 ]	(324.1307, 6948.693)(306.1304, 7338.8867)(346.18195, 2196.6077)	3.42075
(-)-sativan	1	1	1	1200590	3772954	3878558	1646885	1692454	1667414	1	1	1	3461679	3500631	3415459	(-)-sativan	(-)-sativan [ C17 H18 O4, tgt=39.62, overall=39.62 ]	(286.1239, 2096.62)(304.49158, 40724.277)(305.15576, 5739.0947)(290.1565, 1199.3)(295.11548, 2592.327)	3.66944
(-)-secoisolariciresinol	1063817	1098835	1059108	770356	758621	754029	10308988	10267963	5207113	1	1	1	616301	627605	623086	(-)-secoisolariciresinol	(-)-secoisolariciresinol [ C20 H26 O6, tgt=42.30, overall=42.30 ]	(366.18716, 25142.625)(367.18692, 8305.687)(350.1907, 21486.523)(380.20114, 40074.43)(381.2041, 7286.8325)(363.0315, 9324.538)(363.19327, 1814.3866)(386.155, 108.49)	5.1988
(+)-3'-hydroxylarreatricin	1	1	1	238416	267594	247335	1250304	1251193	1212003	3264776	3344230	3192771	2175684	2860200	2887557	(+)-3'-hydroxylarreatricin	(+)-3'-hydroxylarreatricin [ C18 H20 O4, tgt=46.96, overall=46.96 ]	(302.94244, 796.48)(287.14365, 3844.45)(319.42365, 55954.31)(319.16995, 5352.5366)(300.1593, 6077.97)	5.58475
(+)-5-deoxystrigol	142975	163748	160404	429639	501439	326139	5607275	5645813	5537829	2465721	2557175	2520892	3241116	3288329	3205917	(+)-5-deoxystrigol	(+)-5-deoxystrigol [ C19 H22 O5, tgt=49.83, overall=49.83 ]	(334.1597, 9771.425)(335.1622, 980.71)(312.1301, 5860.44)(336.1767, 41973.082)(313.14145, 69882.375)(314.14417, 9275.509)(350.1919, 17138.885)(351.52026, 584.42334)(352.1817, 1546.355)(331.18234, 633.36)(333.1749, 1426.7433)(354.1308, 127.345)	4.6356
(+)-7-iiso/i-jasmonoyl-L-isoleucine	703784	733693	720817	869003	805589	810589	1	1	1	725620	721515	731033	631525	637336	632031	(+)-7-iiso/i-jasmonoyl-L-isoleucine	(+)-7-iiso/i-jasmonoyl-L-isoleucine [ C18 H28 N O4, tgt=24.49, overall=24.49 ]	(345.52896, 7483.2266)(346.21646, 1997.775)(330.18805, 5199.506)(331.43835, 3292.9336)(332.20242, 18319.812)	2.4478
(+)-columbianetin	1	1	1	299282	299724	308633	1	1	1	1	1	1	1	1	1	(+)-columbianetin	(+)-columbianetin [ C14 H14 O4, tgt=44.85, overall=44.85 ]	(247.11858, 4127.6636)(249.11383, 3666.3801)(250.12395, 3134.75)	2.962
(+)-costunolide	2945378	3200988	2835450	1771934	1694349	1715845	1086309	1096274	1116044	2183624	2363202	2878221	2494750	2537288	2548685	(+)-costunolide	(+)-costunolide [ C15 H20 O2, tgt=18.93, overall=18.93 ]	(258.67883, 15676.399)(260.1504, 15797.135)(217.14514, 28365.78)(218.14827, 1578.3734)(235.40616, 1583.81)(236.16255, 3846.14)(239.73526, 2034.7441)(232.16411, 23367.041)	2.7638
(+)-dihydrokaempferol	1	1	1	1	1	1	1	1	1	4107353	4194490	4286045	1	1	1	(+)-dihydrokaempferol	(+)-dihydrokaempferol [ C15 H12 O6, tgt= ]	(271.04932, 125649.4)(272.05197, 9997.133)	9.4118
(+)-heliannuol D	1	1	1	265451	249109	243583	1	1	1	1	1	1	1	1	1	(+)-heliannuol D	(+)-heliannuol D [ C15 H22 O3, tgt=18.93, overall=18.93 ]	(276.14688, 4885.1567)(255.13257, 10689.946)	2.3042
(+)-heliannuol F	1	1	1	14839510	14524781	14278668	12766376	13144110	13328764	9069664	9248635	9109613	11016858	11192076	11593687	(+)-heliannuol F	(+)-heliannuol F [ C15 H20 O4, tgt=61.62, overall=61.62 ]	(264.13245, 3314.2708)(251.1386, 2781.0945)(265.14313, 166457.38)(266.14587, 14790.005)	3.6936
(+)-heliannuol K	8392858	8647739	8580862	1	1	206850	1551536	1602239	1601136	1583305	1568532	1541330	750647	750873	713470	(+)-heliannuol K	(+)-heliannuol K [ C15 H20 O3, tgt= ]	(233.13684, 46982.79)(249.14986, 469.16)(233.64392, 36444.26)(234.14305, 2052.555)(270.1809, 20089.158)(271.18298, 642.91003)(251.16594, 2546.72)(255.87775, 7583.873)(258.13388, 1273.6832)	2.7252
(+)-icis/i-abscisic aldehyde	8392858	8647739	8580862	1	1	206850	1551536	1602239	1601136	1583305	1568532	1541330	750647	750873	713470	(+)-icis/i-abscisic aldehyde	(+)-icis/i-abscisic aldehyde [ C15 H20 O3, tgt= ]	(233.13684, 46982.79)(249.14986, 469.16)(233.64392, 36444.26)(234.14305, 2052.555)(270.1809, 20089.158)(271.18298, 642.91003)(251.16594, 2546.72)(255.87775, 7583.873)(258.13388, 1273.6832)	2.7252
(+)-isopimara-7,15-diene	319766	360653	330787	1	1	1	1	1	1	1	1	1	1	1	1	(+)-isopimara-7,15-diene	(+)-isopimara-7,15-diene [ C20 H32, tgt= ]	(295.23553, 21282.799)(296.24646, 684.85333)	13.4055
(+)-maackiain	1	1	1	1	1	1	1	1	1	2859638	2884991	2933708	1	1	1	(+)-maackiain	(+)-maackiain [ C16 H12 O5, tgt= ]	(285.06412, 101108.93)(286.06693, 8111.5034)	8.3818
(+)-marmesin	1	1	1	299282	299724	308633	1	1	1	1	1	1	1	1	1	(+)-marmesin	(+)-marmesin [ C14 H14 O4, tgt=44.85, overall=44.85 ]	(247.11858, 4127.6636)(249.11383, 3666.3801)(250.12395, 3134.75)	2.962
(+)-menthofuran	1	959772	951568	1	1	1	1	1	1	1	1	1	1	1	1	(+)-menthofuran	(+)-menthofuran [ C10 H14 O, tgt= ]	(132.0967, 10475.06)(133.09595, 895.05005)	2.58386
(+)-secoisolariciresinol	1063817	1098835	1059108	770356	758621	754029	10308988	10267963	5207113	1	1	1	616301	627605	623086	(+)-secoisolariciresinol	(+)-secoisolariciresinol [ C20 H26 O6, tgt=42.30, overall=42.30 ]	(366.18716, 25142.625)(367.18692, 8305.687)(350.1907, 21486.523)(380.20114, 40074.43)(381.2041, 7286.8325)(363.0315, 9324.538)(363.19327, 1814.3866)(386.155, 108.49)	5.1988
(+)-secoisolariciresinol diglucoside	1076793	1141381	1087247	1	1	1	1	1	1	639457	596628	611961	1	1	1	(+)-secoisolariciresinol diglucoside	(+)-secoisolariciresinol diglucoside [ C32 H46 O16, tgt= ]	(668.2696, 28778.033)(669.2715, 2161.77)(704.3155, 14334.566)(705.31714, 1100.8334)(711.28076, 9772.733)(712.28143, 1967.4701)	5.1704
(+)-secoisolariciresinol monoglucoside	1578582	1648524	1513113	2935966	2794026	2709779	404469	417402	384221	1	1	1	2590723	2619646	2627414	(+)-secoisolariciresinol monoglucoside	(+)-secoisolariciresinol monoglucoside [ C26 H36 O11, tgt=29.86, overall=29.86 ]	(524.218, 14162.23)(506.2211, 2147.1033)(508.7388, 4524.9233)(546.27625, 19926.438)(547.2784, 7133.33)(548.2797, 181.34)(525.2497, 26729.352)(526.2526, 4371.9033)(552.23956, 10633.224)(529.1985, 84110.54)(530.2009, 16228.88)(531.2027, 2024.6133)	7.135
(+)-sesaminol 2-iO/i-&beta;-iD/i-gentiobioside	1	1	1	1	1	1	1	1	1	503474	496375	484206	1	1	1	(+)-sesaminol 2-iO/i-&beta;-iD/i-gentiobioside	(+)-sesaminol 2-iO/i-&beta;-iD/i-gentiobioside [ C32 H38 O17, tgt= ]	(694.216, 12291.19)(695.2182, 1529.43)	7.4004
(+)-sesaminol 2-iO/i-&beta;-iD/i-glucoside	1	1	1	1	1	1	1	1	1	433430	448571	441210	1299994	1275021	1303244	(+)-sesaminol 2-iO/i-&beta;-iD/i-glucoside	(+)-sesaminol 2-iO/i-&beta;-iD/i-glucoside [ C26 H28 O12, tgt= ]	(550.2062, 12320.903)(551.1982, 4853.0835)(534.19336, 34902.79)(535.18976, 8515.573)(534.2096, 3451.14)	7.86325
(+)-vernolate	1	15862836	1	4459806	1	5690611	5155897	5295111	5159823	1	1	1	5802391	5738919	1	(+)-vernolate	(+)-vernolate [ C18 H31 O3, tgt=59.33, overall=59.33 ]	(318.72733, 4178.655)(319.2288, 56.62)(279.2197, 32414.385)(280.22275, 9214.97)(295.23303, 6262.265)(296.2439, 437.55)(316.27075, 1044.965)(296.5339, 46534.555)(297.53662, 4630.1313)(298.26138, 2473.24)(299.2657, 287.34)	14.0406
(11iR/i)-dihydroartemisinic aldehyde	232499	234688	238314	1	1	1	1	1	1	1	1	1	1	1	1	(11iR/i)-dihydroartemisinic aldehyde	(11iR/i)-dihydroartemisinic aldehyde [ C15 H24 O, tgt=28.52, overall=28.52 ]	(221.19293, 9531.99)(245.17613, 3018.9534)	2.504
(11iZ/i)-eicos-11-enoate	6369143	6466329	6657034	1005457	975728	987544	1	1	2455425	1	1	1	3458343	3418584	3479817	(11iZ/i)-eicos-11-enoate	(11iZ/i)-eicos-11-enoate [ C20 H37 O2, tgt=16.18, overall=16.18 ]	(296.28354, 1242.7633)(310.29538, 36776.836)(311.2983, 3028.64)(310.29877, 155868.77)(311.30154, 21105.85)	17.7954
(12iE/i)-9&alpha;-labda-8(17),12,14-triene	319766	360653	330787	1	1	1	1	1	1	1	1	1	1	1	1	(12iE/i)-9&alpha;-labda-8(17),12,14-triene	(12iE/i)-9&alpha;-labda-8(17),12,14-triene [ C20 H32, tgt= ]	(295.23553, 21282.799)(296.24646, 684.85333)	13.4055
(12iS/i)-HPETE	4776541	4640499	5035327	1	1	1	1	1	1	1	1	1	838149	1112893	967790	(12iS/i)-HPETE	(12iS/i)-HPETE [ C20H31O4, tgt= ]	(317.21594, 2379.6917)(358.21683, 1271.1234)(318.6292, 14322.099)(319.2304, 431.95)(336.23535, 1970.915)(335.2415, 702.63995)	14.0775
(12Z,15Z)-9,10-dihydroxyoctadeca-12,15-dienoate	1	1	1	2159558	2095579	2063807	1	1	1	1	1	1	1	1	1	(12Z,15Z)-9,10-dihydroxyoctadeca-12,15-dienoate	(12Z,15Z)-9,10-dihydroxyoctadeca-12,15-dienoate [ C18 H31 O4, tgt=17.60, overall=17.60 ]	(295.2136, 1114.3301)(295.23056, 5258.0)(316.2097, 7722.3438)	13.5216
(12Z,15Z)-9,10-epoxyoctadeca-12,15-dienoate	7174679	7414453	7318749	2500215	2415936	2063807	2329480	2286008	2270406	618581	1	605350	3747465	3644194	3818412	(12Z,15Z)-9,10-epoxyoctadeca-12,15-dienoate	(12Z,15Z)-9,10-epoxyoctadeca-12,15-dienoate [ C18 H29 O3, tgt=65.39, overall=65.39 ]	(295.2136, 744.37)(277.20508, 12684.405)(279.0937, 4794.89)(295.2306, 4919.54)(278.5476, 231951.31)(279.55063, 27139.814)(279.2193, 59504.49)(280.2232, 5714.38)(294.6627, 91270.93)(295.69968, 11860.707)(296.24652, 64168.305)(297.25037, 9766.179)(316.2098, 11751.653)	13.772
(13E)-(15S)-11-&alpha;,15-dihydroxy-9-oxoprost-13-enoate	240451	227616	265802	761406	723161	699741	413927	1	275035	1	1	1	9278033	9299422	9388685	(13E)-(15S)-11-&alpha;,15-dihydroxy-9-oxoprost-13-enoate	(13E)-(15S)-11-&alpha;,15-dihydroxy-9-oxoprost-13-enoate [ C20 H33 O5, tgt=68.75, overall=68.75 ]	(356.24753, 19554.488)(358.25302, 196953.25)(359.2554, 26140.354)(336.2357, 7877.06)(378.22125, 67588.695)(379.2238, 7710.49)(360.21793, 4613.034)	7.4198
(13E)-11-&alpha;-hydroxy-9,15-dioxoprost-13-enoate	391223	431557	406129	568582	582489	613022	815711	831674	797434	1	1	1	320091	324166	297354	(13E)-11-&alpha;-hydroxy-9,15-dioxoprost-13-enoate	(13E)-11-&alpha;-hydroxy-9,15-dioxoprost-13-enoate [ C20 H31 O5, tgt=56.16, overall=56.16 ]	(373.2627, 13340.215)(374.71146, 9378.466)(376.21597, 11296.694)(379.22635, 2717.9001)(357.64734, 10550.025)(360.1978, 9931.202)	3.3206
(13iS/i)-HPODE	1	1	1	2159558	2095579	2063807	1	1	1	1	1	1	1	1	1	(13iS/i)-HPODE	(13iS/i)-HPODE [ C18 H31 O4, tgt=17.60, overall=17.60 ]	(295.2136, 1114.3301)(295.23056, 5258.0)(316.2097, 7722.3438)	13.5216
(15iS/i)-HPETE	4776541	4640499	5035327	1	1	1	1	1	1	1	1	1	838149	1112893	967790	(15iS/i)-HPETE	(15iS/i)-HPETE [ C20H31O4, tgt= ]	(317.21594, 2379.6917)(358.21683, 1271.1234)(318.6292, 14322.099)(319.2304, 431.95)(336.23535, 1970.915)(335.2415, 702.63995)	14.0775
(1E,6E)-1-(4-hydroxyphenyl)-7-phenylhepta-1,6-diene-3,5-dione	1	1	1	1	1	1	1	1	1	1	1	1	11546393	11734569	12051778	(1E,6E)-1-(4-hydroxyphenyl)-7-phenylhepta-1,6-diene-3,5-dione	(1E,6E)-1-(4-hydroxyphenyl)-7-phenylhepta-1,6-diene-3,5-dione [ C19 H16 O3, tgt= ]	(310.4872, 228073.7)(311.48965, 26961.664)(312.1573, 1558.1699)	4.47933
(1iE/i,2iZ/i)-3-hydroxy-5,9,17-trioxo-4,5:9,10-disecoandrosta-1 (10),2-dien-4-oate	1422595	1499267	1398321	1	1	1	1	1	1	1	1	1	1	1	1	(1iE/i,2iZ/i)-3-hydroxy-5,9,17-trioxo-4,5:9,10-disecoandrosta-1 (10),2-dien-4-oate	(1iE/i,2iZ/i)-3-hydroxy-5,9,17-trioxo-4,5:9,10-disecoandrosta-1 (10),2-dien-4-oate [ C19H23O6, tgt= ]	(352.17258, 446.77)(329.13675, 21073.428)(330.1405, 961.2834)(331.15524, 130.025)(366.19565, 7031.9336)	2.7536
(1iS/i,2iR/i)-1-C-(indol-3-yl)glycerol 3-phosphate	1	1	1	1	1	1	1	1	1	2859638	2884991	2933708	1	1	1	(1iS/i,2iR/i)-1-C-(indol-3-yl)glycerol 3-phosphate	(1iS/i,2iR/i)-1-C-(indol-3-yl)glycerol 3-phosphate [ C11 H12 N O6 P, tgt= ]	(285.06412, 101108.93)(286.06693, 8111.5034)	8.37675
(1R,3R)-chrysanthemoyl CoA	559866	598411	587501	620069	577420	581256	758767	757877	754304	679981	695581	691270	960311	998659	974580	(1R,3R)-chrysanthemoyl CoA	(1R,3R)-chrysanthemoyl CoA [ C31 H46 N7 O17 P3 S, tgt=11.24, overall=11.24 ]	(901.17505, 2119.085)(901.17725, 2638.1458)(937.20624, 30385.535)(938.208, 3803.6501)(937.2005, 28632.771)(938.20184, 3318.8398)(923.18835, 339.055)	23.3222
(20iS/i)-ginsenoside Rg3	1	1	1	1	1	1	1	1	1	733474	807679	809056	1	1	1	(20iS/i)-ginsenoside Rg3	(20iS/i)-ginsenoside Rg3 [ C42 H72 O13, tgt= ]	(804.5175, 18205.102)(805.5203, 5356.1836)(784.54297, 10444.61)	19.5715
(20iS/i)-ginsenoside Rh2	198067	204365	1	112152	1	1	374138	362016	385377	269700	241363	220273	1079788	1055598	1086490	(20iS/i)-ginsenoside Rh2	(20iS/i)-ginsenoside Rh2 [ C36 H62 O8, tgt=55.16, overall=55.16 ]	(606.45105, 1662.569)(607.43207, 21023.65)(608.4345, 2253.4602)(640.48193, 3375.233)(624.4802, 4414.6133)(625.48425, 11853.09)(626.4858, 1598.579)(651.45496, 1324.3334)(628.4373, 41542.664)(629.44147, 17354.186)(630.4438, 1060.5967)	18.9367
(22&alpha;)-hydroxy-campest-4-en-3-one	1	1	1	1	1	1	1	1	1	1849636	1851794	1919229	1	1	1	(22&alpha;)-hydroxy-campest-4-en-3-one	(22&alpha;)-hydroxy-campest-4-en-3-one [ C28 H46 O2, tgt= ]	(421.33408, 3225.7869)(424.34506, 1638.4467)	15.2282
(22&alpha;)-hydroxy-campesterol	1	1	1	1	1	1	1	1	1	344456	355581	376596	1	1	1	(22&alpha;)-hydroxy-campesterol	(22&alpha;)-hydroxy-campesterol [ C28 H48 O2, tgt= ]	(439.36343, 7760.3867)(421.33408, 4876.0703)	15.22
(22iS/i,24iR/i)-22-hydroxy-5&alpha;-ergostan-3-one	1	1	1	1	1	1	1	1	1	344456	355581	376596	1	1	1	(22iS/i,24iR/i)-22-hydroxy-5&alpha;-ergostan-3-one	(22iS/i,24iR/i)-22-hydroxy-5&alpha;-ergostan-3-one [ C28 H48 O2, tgt= ]	(439.36343, 7760.3867)(421.33408, 4876.0703)	15.22
(2-aminoethyl)phosphonate	3420731	2786778	2670950	5946950	4393980	3540015	3144742	2722881	2539179	2660741	2304394	2056837	1908222	1821732	2082002	(2-aminoethyl)phosphonate	(2-aminoethyl)phosphonate [ C2 H8 N O3 P, tgt=43.02, overall=43.02 ]	(153.02672, 255.632)(130.00253, 25908.26)	0.3474
(2E,4E)-6-(2-aminophenyl)-2-hydroxy-6-oxohexa-2,4-dienoate	1	1	1	1548089	1512315	1494283	1	1	1	16047517	16141532	15942973	1	1	1	(2E,4E)-6-(2-aminophenyl)-2-hydroxy-6-oxohexa-2,4-dienoate	(2E,4E)-6-(2-aminophenyl)-2-hydroxy-6-oxohexa-2,4-dienoate [ C12 H10 N O4, tgt=51.25, overall=51.25 ]	(255.05412, 237179.42)(256.05698, 25557.955)(257.0599, 1386.2201)	7.876
(2iE/i,6iE/i)-farnesal	232499	234688	238314	1	1	1	1	1	1	1	1	1	1	1	1	(2iE/i,6iE/i)-farnesal	(2iE/i,6iE/i)-farnesal [ C15 H24 O, tgt=28.52, overall=28.52 ]	(221.19293, 9531.99)(245.17613, 3018.9534)	2.504
(2iR/i)-homocitrate	1187906	1281663	1315106	1	1	1	1	1	1	1	1	1	1	1	1	(2iR/i)-homocitrate	(2iR/i)-homocitrate [ C7 H7 O7, tgt= ]	(203.04558, 54209.582)(204.04883, 621.5434)	2.17375
(2iR/i)-naringenin	1	1	1	1	1	1494283	1	1	1	16047517	16141532	15942973	1	1	1	(2iR/i)-naringenin	(2iR/i)-naringenin [ C15 H12 O5, tgt= ]	(255.0547, 330717.3)(256.05756, 37128.504)(257.0599, 1386.2201)	7.89243
(2iR/i,2'iR/i)-dihydroxy-iall-trans/i-&beta;-carotene	1	1	1	1	1	1	1	1	1	3136385	3131026	3224160	1	1	1	(2iR/i,2'iR/i)-dihydroxy-iall-trans/i-&beta;-carotene	(2iR/i,2'iR/i)-dihydroxy-iall-trans/i-&beta;-carotene [ C40 H56 O2, tgt= ]	(570.43353, 63812.293)(571.4363, 11921.7)(578.4111, 1320.6766)	15.4336
(2iS/i)-naringenin	1	1	1	1	1	1494283	1	1	1	16047517	16141532	15942973	1	1	1	(2iS/i)-naringenin	(2iS/i)-naringenin [ C15 H12 O5, tgt= ]	(255.0547, 330717.3)(256.05756, 37128.504)(257.0599, 1386.2201)	7.89243
(2-itrans/i-6-itrans/i)-farnesoate	1907987	2058500	2077613	1	1	1	1	1	1	1	1	1	1	1	1	(2-itrans/i-6-itrans/i)-farnesoate	(2-itrans/i-6-itrans/i)-farnesoate [ C15 H23 O2, tgt= ]	(235.17146, 33971.258)(236.17229, 1579.5465)(263.166, 114735.52)(240.1432, 39006.254)	3.11125
(2R,3S)-2,7-dihydroxy-4'-methoxyisoflavanone	1	1	1	1	1	1	1	1	1	1	1	1	1	1	344291	(2R,3S)-2,7-dihydroxy-4'-methoxyisoflavanone	(2R,3S)-2,7-dihydroxy-4'-methoxyisoflavanone [ C16 H14 O5, tgt= ]	(306.1145, 149.95)(309.0748, 9700.26)	8.835
(2R,3Z)-phycocyanobilin	1	1	1	1	1	1	1	1	1	1	1	1	1032039	1015399	1012635	(2R,3Z)-phycocyanobilin	(2R,3Z)-phycocyanobilin [ C33H36N4O6, tgt= ]	(566.24786, 31070.838)(567.25055, 5369.277)(585.2896, 3440.0332)	6.431
(2S)-flavan-4-ol	240377	262159	270857	1	1	1	1	1	1	1	1	1	1	1	1	(2S)-flavan-4-ol	(2S)-flavan-4-ol [ C15 H14 O2, tgt= ]	(211.0973, 288.52)(246.13684, 59296.754)(247.13628, 2693.0566)(249.15007, 1863.68)	2.292
(2S,5R)-2-(2-hydroxypropan-2-yl)-5,9-dimethyl-1-oxaspiro[5.5]undec-8-ene-7,10-dione	8084235	8290507	8266282	1092780	1103261	1085494	1023857	1081384	1083699	689093	705583	694774	227400	215920	212193	(2S,5R)-2-(2-hydroxypropan-2-yl)-5,9-dimethyl-1-oxaspiro[5.5]undec-8-ene-7,10-dione	(2S,5R)-2-(2-hydroxypropan-2-yl)-5,9-dimethyl-1-oxaspiro[5.5]undec-8-ene-7,10-dione [ C15 H22 O4, tgt=13.42, overall=13.42 ]	(266.14627, 15502.266)(267.15604, 10098.674)(287.0609, 14688.47)(270.1803, 18372.832)(271.1823, 341.05832)	3.5826
(3E)-phytochromobilin	1	1	1	622286	644783	621595	1	1	1	1	1	1	1	1	1	(3E)-phytochromobilin	(3E)-phytochromobilin [ C33 H34 N4 O6, tgt=40.42, overall=40.42 ]	(569.2635, 2094.82)(601.2891, 12040.097)(602.29193, 643.72)	3.571
(3iR/i)-3-amino-3-phenylpropanoyl-CoA	234344	256687	242592	145005	125479	125340	169856	280741	259920	285881	277033	287126	119967	131477	135507	(3iR/i)-3-amino-3-phenylpropanoyl-CoA	(3iR/i)-3-amino-3-phenylpropanoyl-CoA [ C30 H42 N8 O17 P3 S, tgt=23.52, overall=23.52 ]	(916.176, 783.6)(894.17017, 9084.765)(895.1684, 678.56866)(894.16425, 7565.66)(930.1977, 7596.2534)	22.7554
(3iS/i,5iR/i,6iS/i)-5,6-epoxy-3-hydroxy-5,6-dihydro-12'-apo-&beta;-caroten-12'-al	1018206	1081094	1038927	1	1	1	1	1	1	1	1	1	1	1	1	(3iS/i,5iR/i,6iS/i)-5,6-epoxy-3-hydroxy-5,6-dihydro-12'-apo-&beta;-caroten-12'-al	(3iS/i,5iR/i,6iS/i)-5,6-epoxy-3-hydroxy-5,6-dihydro-12'-apo-&beta;-caroten-12'-al [ C25 H34 O3, tgt= ]	(383.26132, 26801.367)(384.26248, 1694.6866)	4.52379
(3R)-3-(6-hydroxy-2H-1,3-benzodioxol-5-yl)-3,4-dihydro-2H-1-benzopyran-4,7-diol	1	1	1	1	1	1	1	1	1	2859638	2884991	2933708	1	1	1	(3R)-3-(6-hydroxy-2H-1,3-benzodioxol-5-yl)-3,4-dihydro-2H-1-benzopyran-4,7-diol	(3R)-3-(6-hydroxy-2H-1,3-benzodioxol-5-yl)-3,4-dihydro-2H-1-benzopyran-4,7-diol [ C16 H14 O6, tgt= ]	(285.06412, 101108.93)(286.06693, 8111.5034)	8.3818
(3R)-vestitone	1	1	1	1	1	1	1	1	1	1	1	1	1	1	344291	(3R)-vestitone	(3R)-vestitone [ C16 H14 O5, tgt= ]	(306.1145, 149.95)(309.0748, 9700.26)	8.835
(3R, 7S)-12-hydroxy-jasmonoyl-L-isoleucine	349864	1085490	1024657	138978	345362	313905	1	1	1	1	1	1	276729	284116	275378	(3R, 7S)-12-hydroxy-jasmonoyl-L-isoleucine	(3R, 7S)-12-hydroxy-jasmonoyl-L-isoleucine [ C18 H28 N O5, tgt=24.11, overall=24.11 ]	(341.21408, 37761.938)(342.22153, 8006.733)(358.24014, 5652.053)(362.85297, 8606.637)(343.18204, 5549.78)(344.18433, 254.61499)	4.08675
(3Z)-phytochromobilin	1	1	1	622286	644783	621595	1	1	1	1	1	1	1	1	1	(3Z)-phytochromobilin	(3Z)-phytochromobilin [ C33 H34 N4 O6, tgt=40.42, overall=40.42 ]	(569.2635, 2094.82)(601.2891, 12040.097)(602.29193, 643.72)	3.571
(4E,6E)-1-(4-hydroxyphenyl)-7-phenylhepta-4,6-dien-3-one	1557908	1692761	2125181	1251727	1114255	1197750	423802	450366	435125	1041381	1001191	994436	1836499	1837613	1808587	(4E,6E)-1-(4-hydroxyphenyl)-7-phenylhepta-4,6-dien-3-one	(4E,6E)-1-(4-hydroxyphenyl)-7-phenylhepta-4,6-dien-3-one [ C19 H18 O2, tgt=58.91, overall=58.91 ]	(280.27454, 10094.773)(281.388, 3676.2336)(263.1301, 68536.945)(264.1324, 3522.0967)(265.1423, 165615.22)(281.1362, 26744.19)(282.1388, 572.96)(261.66647, 11050.3125)(264.89206, 13681.093)(265.6468, 52849.324)(266.1475, 9690.83)(298.56915, 8195.635)(301.17953, 401.04666)(303.13254, 8413.932)(304.13272, 1589.0099)(284.1862, 5520.531)	2.582
(4Z,7Z,10Z,13Z,16Z,19Z)-docosahexaenoate	1	1	1	1	1	1	1	1	1	1833761	1	3106188	1	1	1	(4Z,7Z,10Z,13Z,16Z,19Z)-docosahexaenoate	(4Z,7Z,10Z,13Z,16Z,19Z)-docosahexaenoate [ C22 H31 O2, tgt=12.63, overall=12.63 ]	(332.2034, 30943.824)(333.20593, 169.58)	3.695
(5Z)-(15S)-11-&alpha;-hydroxy-9,15-dioxoprosta-13-enoate	1	1	1208060	2043126	1984072	1979062	254721	1	1	1833761	3969223	3105616	502563	230737	197429	(5Z)-(15S)-11-&alpha;-hydroxy-9,15-dioxoprosta-13-enoate	(5Z)-(15S)-11-&alpha;-hydroxy-9,15-dioxoprosta-13-enoate [ C20 H29 O5, tgt=57.84, overall=57.84 ]	(352.20642, 4237.93)(331.18875, 2625.8767)(332.2028, 26580.152)(333.20593, 169.58)(349.21655, 2444.2234)(374.19766, 59858.71)(375.77414, 15539.03)(375.20996, 2618.7832)(357.1927, 2313.335)	4.49623
(5Z)-(15S)-11-&alpha;-hydroxy-9,15-dioxoprostanoate	391223	431557	406129	568582	582489	613022	815711	831674	797434	1	1	1	320091	324166	297354	(5Z)-(15S)-11-&alpha;-hydroxy-9,15-dioxoprostanoate	(5Z)-(15S)-11-&alpha;-hydroxy-9,15-dioxoprostanoate [ C20 H31 O5, tgt=56.16, overall=56.16 ]	(373.2627, 13340.215)(374.71146, 9378.466)(376.21597, 11296.694)(379.22635, 2717.9001)(357.64734, 10550.025)(360.1978, 9931.202)	3.3206
(6S)-hydroxyhyoscyamine	1	1	1	1	1	1	273239	1609520	1553384	1	1	1	1361258	1365704	1397020	(6S)-hydroxyhyoscyamine	(6S)-hydroxyhyoscyamine [ C17 H24 N O4, tgt= ]	(307.16605, 34743.17)(290.1742, 1990.7)(312.40836, 34098.215)(312.15747, 1717.3033)	4.11573
(8iS/i)-HPETE	4776541	4640499	5035327	1	1	1	1	1	1	1	1	1	838149	1112893	967790	(8iS/i)-HPETE	(8iS/i)-HPETE [ C20H31O4, tgt= ]	(317.21594, 2379.6917)(358.21683, 1271.1234)(318.6292, 14322.099)(319.2304, 431.95)(336.23535, 1970.915)(335.2415, 702.63995)	14.0775
(9iR/i)-HPODE	1	1	1	2159558	2095579	2063807	1	1	1	1	1	1	1	1	1	(9iR/i)-HPODE	(9iR/i)-HPODE [ C18 H31 O4, tgt=17.60, overall=17.60 ]	(295.2136, 1114.3301)(295.23056, 5258.0)(316.2097, 7722.3438)	13.5216
(9iS/i)-HPODE	1	1	1	2159558	2095579	2063807	1	1	1	1	1	1	1	1	1	(9iS/i)-HPODE	(9iS/i)-HPODE [ C18 H31 O4, tgt=17.60, overall=17.60 ]	(295.2136, 1114.3301)(295.23056, 5258.0)(316.2097, 7722.3438)	13.5216
(9R,10S)-dihydroxystearate	1	1	1	1	1	1	1293905	1327340	1	1	1	1	374249	348763	361169	(9R,10S)-dihydroxystearate	(9R,10S)-dihydroxystearate [ C18 H35 O4, tgt=5.03, overall=5.03 ]	(297.24908, 7864.7563)(318.28754, 1356.5566)(320.24155, 17150.285)	13.9158
(9S,10S)-10-hydroxy-9-(phosphonooxy) octadecanoate	5297574	5575937	5450438	4245109	4173637	4174377	1314648	1334315	722423	2550938	2596454	3844233	1	9646063	9728998	(9S,10S)-10-hydroxy-9-(phosphonooxy) octadecanoate	(9S,10S)-10-hydroxy-9-(phosphonooxy) octadecanoate [ C18 H34 O7 P, tgt=87.58, overall=87.58 ]	(393.45337, 62248.86)(394.71024, 14081.632)(396.20712, 2597.6467)(376.6453, 4904.08)(380.20303, 43999.004)(394.2152, 17859.414)(395.2181, 701.61334)(376.20792, 170325.05)(377.2113, 41884.145)(416.24524, 1710.3667)(393.2386, 13165.47)(416.2041, 1157.76)(401.19324, 9355.518)(400.18704, 2589.33)	6.23673
(9S,10S)-9,10-dihydroxyoctadecanoate	1	1	1	1	1	1	1293905	1327340	1	1	1	1	374249	348763	361169	(9S,10S)-9,10-dihydroxyoctadecanoate	(9S,10S)-9,10-dihydroxyoctadecanoate [ C18 H35 O4, tgt=5.03, overall=5.03 ]	(297.24908, 7864.7563)(318.28754, 1356.5566)(320.24155, 17150.285)	13.62
(9Z)-(13S)-12,13-epoxyoctadeca-9,11-dienoate	7174679	7414453	7318749	2500215	2415936	2063807	2329480	2286008	2270406	618581	1	605350	3747465	3644194	3818412	(9Z)-(13S)-12,13-epoxyoctadeca-9,11-dienoate	(9Z)-(13S)-12,13-epoxyoctadeca-9,11-dienoate [ C18 H29 O3, tgt=65.39, overall=65.39 ]	(295.2136, 744.37)(277.20508, 12684.405)(279.0937, 4794.89)(295.2306, 4919.54)(278.5476, 231951.31)(279.55063, 27139.814)(279.2193, 59504.49)(280.2232, 5714.38)(294.6627, 91270.93)(295.69968, 11860.707)(296.24652, 64168.305)(297.25037, 9766.179)(316.2098, 11751.653)	13.772
(9Z)-12,13,17-trihydroxyoctadeca-9-enoate	5264226	5369749	5255020	1	1	1	1	1	1	1	1	1	1	1	1	(9Z)-12,13,17-trihydroxyoctadeca-9-enoate	(9Z)-12,13,17-trihydroxyoctadeca-9-enoate [ C18 H33 O5, tgt=17.29, overall=17.29 ]	(330.22607, 74160.77)(331.22852, 5852.543)	3.697
(9Z)-12,13-dihydroxyoctadeca-9-enoate	793089	764799	822664	1	1	1	221073	241488	246270	455659	454012	487573	175269	166360	184097	(9Z)-12,13-dihydroxyoctadeca-9-enoate	(9Z)-12,13-dihydroxyoctadeca-9-enoate [ C18H33O4, tgt= ]	(331.27045, 6303.709)(313.26086, 17567.328)(314.26495, 2428.7834)	16.4042
(9Z,11E,14Z)-(13S)-hydroperoxyoctadeca-(9,11,14)-trienoate	1	1	1	1	1	1	1	1	1	1	1	1	1	437734	427520	(9Z,11E,14Z)-(13S)-hydroperoxyoctadeca-(9,11,14)-trienoate	(9Z,11E,14Z)-(13S)-hydroperoxyoctadeca-(9,11,14)-trienoate [ C18H29O4, tgt= ]	(332.20404, 10161.09)(318.18945, 16848.39)	4.8952
(9Z,12E)-octadecadienoate	339712	8471724	1	1	1	1	1	1	1	1	1	1	1	1	1	(9Z,12E)-octadecadienoate	(9Z,12E)-octadecadienoate [ C18H31O2, tgt= ]	(263.22736, 47566.355)(264.23035, 4579.465)(280.25378, 524482.94)(281.2567, 83967.19)(282.26025, 3963.77)	14.7035
(9Z,12Z)-15,16-dihydroxyoctadeca-9,12-dienoate	1	1	1	2159558	2095579	2063807	1	1	1	1	1	1	1	1	1	(9Z,12Z)-15,16-dihydroxyoctadeca-9,12-dienoate	(9Z,12Z)-15,16-dihydroxyoctadeca-9,12-dienoate [ C18 H31 O4, tgt=17.60, overall=17.60 ]	(295.2136, 1114.3301)(295.23056, 5258.0)(316.2097, 7722.3438)	13.5216
(9Z,12Z)-15,16-epoxyoctadeca-9,12-dienoate	7174679	7414453	7318749	2500215	2415936	2063807	2329480	2286008	2270406	618581	1	605350	3747465	3644194	3818412	(9Z,12Z)-15,16-epoxyoctadeca-9,12-dienoate	(9Z,12Z)-15,16-epoxyoctadeca-9,12-dienoate [ C18 H29 O3, tgt=65.39, overall=65.39 ]	(295.2136, 744.37)(277.20508, 12684.405)(279.0937, 4794.89)(295.2306, 4919.54)(278.5476, 231951.31)(279.55063, 27139.814)(279.2193, 59504.49)(280.2232, 5714.38)(294.6627, 91270.93)(295.69968, 11860.707)(296.24652, 64168.305)(297.25037, 9766.179)(316.2098, 11751.653)	13.772
(9Z,12Z)-octadecadien-6-ynoate	1	1	1	1	1	377731	1	1	1	1	1	1	1	1	1	(9Z,12Z)-octadecadien-6-ynoate	(9Z,12Z)-octadecadien-6-ynoate [ C18 H27 O2, tgt= ]	(277.2034, 11865.63)(278.206, 1039.09)	8.711
(9Z,12Z,15Z)-octadecatrien-6-ynoate	1	1	1	1	1	1	1	1	1	1	1	1	1	1	628116	(9Z,12Z,15Z)-octadecatrien-6-ynoate	(9Z,12Z,15Z)-octadecatrien-6-ynoate [ C18 H25 O2, tgt= ]	(298.1879, 3102.53)(279.1595, 14888.76)	3.94257
(9Z,15Z)-12,13-dihydroxyoctadeca-9,15-dienoate	1	1	1	2159558	2095579	2063807	1	1	1	1	1	1	1	1	1	(9Z,15Z)-12,13-dihydroxyoctadeca-9,15-dienoate	(9Z,15Z)-12,13-dihydroxyoctadeca-9,15-dienoate [ C18 H31 O4, tgt=17.60, overall=17.60 ]	(295.2136, 1114.3301)(295.23056, 5258.0)(316.2097, 7722.3438)	13.5216
(9Z,15Z)-12,13-epoxy-octadeca-9,15-dienoate	7174679	7414453	7318749	2500215	2415936	2063807	2329480	2286008	2270406	618581	1	605350	3747465	3644194	3818412	(9Z,15Z)-12,13-epoxy-octadeca-9,15-dienoate	(9Z,15Z)-12,13-epoxy-octadeca-9,15-dienoate [ C18 H29 O3, tgt=65.39, overall=65.39 ]	(295.2136, 744.37)(277.20508, 12684.405)(279.0937, 4794.89)(295.2306, 4919.54)(278.5476, 231951.31)(279.55063, 27139.814)(279.2193, 59504.49)(280.2232, 5714.38)(294.6627, 91270.93)(295.69968, 11860.707)(296.24652, 64168.305)(297.25037, 9766.179)(316.2098, 11751.653)	13.772
(i22R,23R/i)-28-homobrassinolide	155792	176371	176630	745404	753671	745361	267524	285327	268743	528478	524461	526954	1049893	1020839	1044262	(i22R,23R/i)-28-homobrassinolide	(i22R,23R/i)-28-homobrassinolide [ C29 H50 O6, tgt=12.81, overall=12.81 ]	(496.36374, 28775.318)(497.36572, 3955.4866)(477.34, 4250.5737)(482.38358, 13334.675)(483.38644, 1389.6266)(512.39374, 10152.795)(513.3977, 151.2)(520.6155, 2342.6282)(500.85385, 13318.862)(501.35733, 4463.187)	13.2144
(i22R,23R/i)-28-homobrassinolide 22-sulfate	1082523	1073915	2569769	659868	678123	689232	600799	659783	593104	1334802	1311372	1289349	862742	801634	506147	(i22R,23R/i)-28-homobrassinolide 22-sulfate	(i22R,23R/i)-28-homobrassinolide 22-sulfate [ C29 H49 O9 S, tgt=61.56, overall=61.56 ]	(575.1072, 14342.776)(575.80884, 1819.155)(577.32, 1668.0533)(576.3104, 1715.88)(556.8096, 6452.0728)(557.55505, 1652.76)(574.33435, 18081.785)(575.33685, 2744.7676)(578.32806, 1343.4951)(599.30695, 4767.62)(600.3091, 338.51334)(601.29034, 1413.32)(582.9195, 2138.935)	5.92833
(i22R,23R/i)-28-homocastasterone	884871	908527	888108	1	1	1	2178118	2168095	2141383	190298	215558	201437	204042	194624	197429	(i22R,23R/i)-28-homocastasterone	(i22R,23R/i)-28-homocastasterone [ C29 H50 O5, tgt=32.26, overall=32.26 ]	(502.61044, 26741.078)(502.36328, 2944.387)(483.60876, 10852.759)(484.32986, 8361.612)	10.2927
(i22R,23R/i)-28-homocastasterone 22-O-sulfate	297018	301106	298336	659868	678123	725358	1290862	1363839	1288147	655969	690324	682326	508579	512955	553425	(i22R,23R/i)-28-homocastasterone 22-O-sulfate	(i22R,23R/i)-28-homocastasterone 22-O-sulfate [ C29 H49 O8 S, tgt=56.49, overall=56.49 ]	(557.3067, 7777.867)(558.28955, 618.73663)(540.5616, 15280.648)(543.1017, 12890.979)(543.2944, 3867.18)(545.0575, 24201.25)(542.3267, 3262.79)(544.3085, 4741.46)(581.3499, 184.6)(584.3111, 18616.02)(585.3155, 3854.8184)(562.293, 27805.656)(563.2984, 6544.8906)	5.4884
(i2E,6E/i)-farnesyl methyl ester	92202344	94428008	92672336	1	1	1	1	1	1	1	1	1	1	1	1	(i2E,6E/i)-farnesyl methyl ester	(i2E,6E/i)-farnesyl methyl ester [ C16 H26 O2, tgt= ]	(250.19057, 941135.3)(251.19316, 65455.94)(252.19534, 622.59503)(233.19215, 4059.8533)	10.6598
(iE,E/i)-farnesylacetone	2323632	2424559	2361148	1	1	7141669	9547877	9724920	9531724	404381	389590	436995	506323	519068	16756296	(iE,E/i)-farnesylacetone	(iE,E/i)-farnesylacetone [ C18 H30 O, tgt=45.23, overall=45.23 ]	(263.22626, 11182.308)(265.07327, 19926.22)(266.24515, 3927.0698)(245.88835, 5390.61)(247.63315, 2365.6682)(268.25235, 151504.48)(282.26852, 765434.4)(283.27173, 230789.42)(284.27423, 13594.893)	15.5437
(iE/i)-2,4-dihydroxycinnamate	1098067	1185853	1197950	1	1	1	1045405	1087842	1078573	1	1	1	462505	473007	447480	(iE/i)-2,4-dihydroxycinnamate	(iE/i)-2,4-dihydroxycinnamate [ C9 H7 O4, tgt=73.41, overall=73.41 ]	(183.04347, 2190.0984)(161.02287, 26742.764)(162.02422, 1221.4618)(163.02037, 771.74506)(165.043, 337.85)	2.223
(iE/i)-2-methylcrotonoyl-CoA	137407	164509	162853	2069672	1978459	131094	183029	165857	176945	165052	142636	149814	183971	194145	178936	(iE/i)-2-methylcrotonoyl-CoA	(iE/i)-2-methylcrotonoyl-CoA [ C26 H38 N7 O17 P3 S, tgt=52.86, overall=52.86 ]	(851.1345, 2504.6675)(829.1224, 6775.6846)(850.7383, 31388.229)(851.14276, 8775.405)(852.1185, 2149.065)(829.12335, 6983.997)(865.1486, 6640.899)(866.1472, 2738.5024)(851.1362, 2972.7)(851.1323, 2626.34)	22.5946
(iE/i)-cinnamoyl-CoA	326732	442687	242592	252111	483091	477230	559881	537064	509125	550521	538394	557958	601908	627921	608184	(iE/i)-cinnamoyl-CoA	(iE/i)-cinnamoyl-CoA [ C30 H38 N7 O17 P3 S, tgt=12.96, overall=12.96 ]	(881.1375, 577.32)(880.397, 335.57)(916.1742, 1137.2)(894.1688, 12128.443)(895.1674, 745.0258)	22.688
(iE/i)-geranylacetone	1	1	167055	1	1	1	1	1	1	1	1	1	1	1	1	(iE/i)-geranylacetone	(iE/i)-geranylacetone [ C13 H22 O, tgt= ]	(198.1781, 4746.36)	16.6385
(iE/i)-phenylacetaldehyde oxime	1	1	1	1	1	1	1	1	1	1	1	1	666618	360258	355333	(iE/i)-phenylacetaldehyde oxime	(iE/i)-phenylacetaldehyde oxime [ C8 H9 N O, tgt= ]	(136.06963, 1001.8333)(118.0601, 5031.017)	4.353
(iR/i)-2-hydroxyglutarate	2431818	2560629	2562131	2955193	2822487	2817475	2953255	3027339	3045514	2621162	2633130	2579227	2551931	2547150	2541294	(iR/i)-2-hydroxyglutarate	(iR/i)-2-hydroxyglutarate [ C5 H6 O5, tgt=58.66, overall=58.66 ]	(151.02965, 143840.2)(128.014, 141645.3)(129.0148, 19930.479)(130.01068, 10283.287)(129.01605, 17283.137)(130.01202, 9524.754)(154.00682, 3311.9846)(155.0055, 295.825)	2.0036
(iR/i)-3-hydroxybutanoyl-CoA	3625851	3784500	3768140	4154916	3967554	3901978	4528236	4398879	4315831	3973977	4006274	3957527	4790650	4856599	4759511	(iR/i)-3-hydroxybutanoyl-CoA	(iR/i)-3-hydroxybutanoyl-CoA [ C25 H38 N7 O18 P3 S, tgt=36.11, overall=36.11 ]	(836.1292, 1253.4802)(850.15063, 67913.164)(851.1519, 8287.34)(871.35364, 5963.2944)(872.16016, 9647.937)(850.145, 75763.9)(851.14624, 9194.139)(852.1237, 2826.806)	23.0594
(iR/i)-coclaurine	3935027	4140289	4052642	1575855	1514886	1523225	1	1	1	1	1	664579	936294	909441	1029889	(iR/i)-coclaurine	(iR/i)-coclaurine [ C17 H20 N O3, tgt=41.45, overall=41.45 ]	(289.1526, 8135.1855)(290.1587, 204.41)(269.14813, 54770.156)(270.15076, 1832.8234)(304.17007, 4248.378)(286.16394, 23842.988)(287.1676, 4766.7734)(294.13297, 3837.3599)	2.477
(iR/i)-iN/i-methylcoclaurine	1	1	1	1	1	1	585596	638365	607734	397298	403792	1	1350927	1157314	1124476	(iR/i)-iN/i-methylcoclaurine	(iR/i)-iN/i-methylcoclaurine [ C18H22NO3, tgt= ]	(303.6641, 12523.219)(304.56528, 15712.102)(305.16504, 951.54004)(286.16315, 2538.2)(287.15976, 3276.0598)(304.1693, 2533.26)(318.1882, 9329.463)(300.17834, 2599.2737)(306.14252, 565.5375)	3.4086
(iR/i)-laudanine	601265	652506	657033	1	1	1	1	1	1	1	1	1	1	1	1	(iR/i)-laudanine	(iR/i)-laudanine [ C20H26NO4, tgt= ]	(344.85165, 1357.6901)(345.20114, 10202.101)(346.2171, 1279.075)(330.18967, 7714.267)(332.20462, 10892.477)(371.17856, 648.2867)(350.1579, 3115.61)	5.5974
(iR/i)-NADHX	246410	292768	286804	142847	141872	142512	644199	645516	601132	1	1	1	982170	957361	968113	(iR/i)-NADHX	(iR/i)-NADHX [ C21 H29 N7 O15 P2, tgt=30.72, overall=30.72 ]	(664.1211, 179.965)(682.1451, 5790.0225)(701.1607, 3292.1907)(702.16327, 1092.8717)(703.14874, 938.3033)(682.1508, 9607.933)	18.885
(iR/i)-NADPHX	1967386	1676539	379094	2046834	2331350	668433	563329	759251	356279	379302	368644	518808	302278	2005432	495466	(iR/i)-NADPHX	(iR/i)-NADPHX [ C21 H28 N7 O18 P3, tgt=50.48, overall=50.48 ]	(763.7475, 12449.446)(764.07916, 3890.2651)(741.0608, 127.35)(763.0865, 53607.973)(764.086, 5588.4937)(742.0646, 8951.247)(778.1735, 19488.197)(779.0906, 2999.42)(786.08856, 2727.8103)(765.7298, 2956.115)(769.0716, 772.885)	22.3666
(iR/i)-norcoclaurine	1	1	1	522818	508354	512050	1	1	1	1	1	1	1	1	1	(iR/i)-norcoclaurine	(iR/i)-norcoclaurine [ C16 H18 N O3, tgt=46.28, overall=46.28 ]	(276.1504, 5896.1665)(255.13257, 7634.293)(290.15695, 7742.16)(280.11673, 2674.55)	2.4642
(iR/i)-pantolactone	662556	715667	837082	1	1	1	1	1	1	1	1	1	1	1	1	(iR/i)-pantolactone	(iR/i)-pantolactone [ C6 H10 O3, tgt= ]	(116.0662, 1412.9233)(138.04926, 2891.1965)	3.95986
(iS/i)-2,3,4,5-tetrahydrodipicolinate	2915074	2964618	2950304	3265454	3097734	2948693	3135809	3110285	3251643	2811174	3026959	2974563	2785718	2790744	2964076	(iS/i)-2,3,4,5-tetrahydrodipicolinate	(iS/i)-2,3,4,5-tetrahydrodipicolinate [ C7 H7 N O4, tgt=65.15, overall=65.15 ]	(170.0401, 611.83)(151.02937, 141167.84)(152.03055, 15982.922)(153.02676, 11647.928)(170.04147, 578.32996)	2.005
(iS/i)-2-aceto-2-hydroxybutanoate	355957	377436	352721	504116	477929	489794	504513	518310	524257	432036	432244	407891	403190	415685	395140	(iS/i)-2-aceto-2-hydroxybutanoate	(iS/i)-2-aceto-2-hydroxybutanoate [ C6 H9 O4, tgt=59.53, overall=59.53 ]	(168.11029, 23722.033)(169.04456, 1697.6423)(170.04137, 610.2955)(151.02937, 147969.86)(152.03055, 16903.568)	2.0036
(iS/i)-2-chloropropanoate	708056	804784	785176	869327	855176	884261	1056211	1110455	1129194	984871	941824	932813	954479	983916	938690	(iS/i)-2-chloropropanoate	(iS/i)-2-chloropropanoate [ C3 H4 Cl O2, tgt=26.88, overall=26.88 ]	(106.9871, 1239.9767)(113.00329, 44608.188)(115.00649, 5340.8936)(127.01884, 59046.805)	2.0036
(iS/i)-2-hydroxyglutarate	2431818	2560629	2562131	2955193	2822487	2817475	2953255	3027339	3045514	2621162	2633130	2579227	2551931	2547150	2541294	(iS/i)-2-hydroxyglutarate	(iS/i)-2-hydroxyglutarate [ C5 H6 O5, tgt=58.66, overall=58.66 ]	(151.02965, 143840.2)(128.014, 141645.3)(129.0148, 19930.479)(130.01068, 10283.287)(129.01605, 17283.137)(130.01202, 9524.754)(154.00682, 3311.9846)(155.0055, 295.825)	2.0036
(iS/i)-3-hydroxybutanoyl-CoA	3625851	3784500	3768140	4154916	3967554	3901978	4528236	4398879	4315831	3973977	4006274	3957527	4790650	4856599	4759511	(iS/i)-3-hydroxybutanoyl-CoA	(iS/i)-3-hydroxybutanoyl-CoA [ C25 H38 N7 O18 P3 S, tgt=36.11, overall=36.11 ]	(836.1292, 1253.4802)(850.15063, 67913.164)(851.1519, 8287.34)(871.35364, 5963.2944)(872.16016, 9647.937)(850.145, 75763.9)(851.14624, 9194.139)(852.1237, 2826.806)	23.0594
(iS/i)-3-hydroxyhexanoyl-CoA	1499067	1578653	1576541	1641556	1561204	1550686	1931394	1910616	1873490	1718746	1737717	1710800	2129930	2183175	2132177	(iS/i)-3-hydroxyhexanoyl-CoA	(iS/i)-3-hydroxyhexanoyl-CoA [ C27 H42 N7 O18 P3 S, tgt=55.70, overall=55.70 ]	(865.14874, 1135.5441)(879.1603, 60912.09)(880.1617, 7683.63)(881.1379, 1233.51)(901.17645, 6646.1055)(879.1659, 61031.375)(880.16736, 7742.254)(901.1706, 6627.18)	23.1456
(iS/i)-3-hydroxy-isobutanoyl-CoA	3625851	3784500	3768140	4154916	3967554	3901978	4528236	4398879	4315831	3973977	4006274	3957527	4790650	4856599	4759511	(iS/i)-3-hydroxy-isobutanoyl-CoA	(iS/i)-3-hydroxy-isobutanoyl-CoA [ C25 H38 N7 O18 P3 S, tgt=36.11, overall=36.11 ]	(836.1292, 1253.4802)(850.15063, 67913.164)(851.1519, 8287.34)(871.35364, 5963.2944)(872.16016, 9647.937)(850.145, 75763.9)(851.14624, 9194.139)(852.1237, 2826.806)	23.0594
(iS/i)-4-amino-4,5-dihydro-2-thiophenecarboxylate	2146547	2250053	2244637	2582993	2474109	2474505	2604003	2675466	2695689	2325605	2337679	2281671	2252158	2243125	2233509	(iS/i)-4-amino-4,5-dihydro-2-thiophenecarboxylate	(iS/i)-4-amino-4,5-dihydro-2-thiophenecarboxylate [ C5 H7 N O2 S, tgt=47.01, overall=47.01 ]	(147.01712, 858.1277)(128.29875, 115786.445)(130.00948, 8810.314)(151.02937, 145584.77)(128.01506, 124715.44)(129.01653, 17299.562)(130.0124, 10251.15)	2.0036
(iS/i)-citramalate	2431818	2560629	2562131	2955193	2822487	2817475	2953255	3027339	3045514	2621162	2633130	2579227	2551931	2547150	2541294	(iS/i)-citramalate	(iS/i)-citramalate [ C5 H6 O5, tgt=58.66, overall=58.66 ]	(151.02965, 143840.2)(128.014, 141645.3)(129.0148, 19930.479)(130.01068, 10283.287)(129.01605, 17283.137)(130.01202, 9524.754)(154.00682, 3311.9846)(155.0055, 295.825)	2.0036
(iS/i)-ethylmalonyl-CoA	130044	1	1	532639	507710	1	123621	574064	148366	138475	138374	142410	161058	172202	164757	(iS/i)-ethylmalonyl-CoA	(iS/i)-ethylmalonyl-CoA [ C26 H37 N7 O19 P3 S, tgt=11.79, overall=11.79 ]	(881.1453, 887.19403)(894.166, 8056.009)(895.1627, 333.815)(880.7832, 1510.7544)(880.15985, 532.71)	22.9048
(iS/i)-iN/i-methylcoclaurine	1	1	1	1	1	1	585596	638365	607734	397298	403792	1	1350927	1157314	1124476	(iS/i)-iN/i-methylcoclaurine	(iS/i)-iN/i-methylcoclaurine [ C18H22NO3, tgt= ]	(303.6641, 12523.219)(304.56528, 15712.102)(305.16504, 951.54004)(286.16315, 2538.2)(287.15976, 3276.0598)(304.1693, 2533.26)(318.1882, 9329.463)(300.17834, 2599.2737)(306.14252, 565.5375)	3.4086
(iS/i)-laudanine	601265	652506	657033	1	1	1	1	1	1	1	1	1	1	1	1	(iS/i)-laudanine	(iS/i)-laudanine [ C20H26NO4, tgt= ]	(344.85165, 1357.6901)(345.20114, 10202.101)(346.2171, 1279.075)(330.18967, 7714.267)(332.20462, 10892.477)(371.17856, 648.2867)(350.1579, 3115.61)	5.5974
(iS/i)-methylmalonate-semialdehyde	126234	130866	136447	135439	125597	127770	136667	134155	227743	131302	123314	120662	123138	129936	123943	(iS/i)-methylmalonate-semialdehyde	(iS/i)-methylmalonate-semialdehyde [ C4 H5 O3, tgt=18.64, overall=18.64 ]	(101.02159, 7525.1147)(102.01768, 6374.6016)(127.01884, 55787.168)	2.0132
(iS/i)-NADHX	246410	292768	286804	142847	141872	142512	644199	645516	601132	1	1	1	982170	957361	968113	(iS/i)-NADHX	(iS/i)-NADHX [ C21 H29 N7 O15 P2, tgt=30.72, overall=30.72 ]	(664.1211, 179.965)(682.1451, 5790.0225)(701.1607, 3292.1907)(702.16327, 1092.8717)(703.14874, 938.3033)(682.1508, 9607.933)	18.885
(iS/i)-NADPHX	1967386	1676539	379094	2046834	2331350	668433	563329	759251	356279	379302	368644	518808	302278	2005432	495466	(iS/i)-NADPHX	(iS/i)-NADPHX [ C21 H28 N7 O18 P3, tgt=50.48, overall=50.48 ]	(763.7475, 12449.446)(764.07916, 3890.2651)(741.0608, 127.35)(763.0865, 53607.973)(764.086, 5588.4937)(742.0646, 8951.247)(778.1735, 19488.197)(779.0906, 2999.42)(786.08856, 2727.8103)(765.7298, 2956.115)(769.0716, 772.885)	22.3666
(iS/i)-reticuline	492390	525733	505170	557526	544558	318223	237021	232450	221117	1	1	1	1	1	1	(iS/i)-reticuline	(iS/i)-reticuline [ C19 H24 N O4, tgt=49.07, overall=49.07 ]	(317.06897, 6775.8335)(318.18768, 7594.38)(330.18768, 8715.527)(331.1825, 1917.8234)(338.16055, 4046.57)	2.833
(iS/i)-sakuranetin	1	1	1	1	1	1	1	1	1	1	1	1	1	1	344291	(iS/i)-sakuranetin	(iS/i)-sakuranetin [ C16 H14 O5, tgt= ]	(306.1145, 149.95)(309.0748, 9700.26)	8.835
(iS/i)-scoulerine	1	1	1	254785	221718	1	1	1	1	1	1	1	11329435	11457444	11776246	(iS/i)-scoulerine	(iS/i)-scoulerine [ C19 H21 N O4, tgt=19.52, overall=19.52 ]	(333.17468, 1774.73)(310.4872, 228073.7)(311.48965, 26961.664)(312.1573, 1558.1699)(346.18054, 20772.045)(330.18585, 10057.105)(352.1508, 1680.3433)	3.7385
(iZ/i)-2,4-dihydroxycinnamate	1098067	1185853	1197950	1	1	1	1045405	1087842	1078573	1	1	1	462505	473007	447480	(iZ/i)-2,4-dihydroxycinnamate	(iZ/i)-2,4-dihydroxycinnamate [ C9 H7 O4, tgt=73.41, overall=73.41 ]	(183.04347, 2190.0984)(161.02287, 26742.764)(162.02422, 1221.4618)(163.02037, 771.74506)(165.043, 337.85)	2.223
(iZ/i)-butanethiol-S-oxide	821819	908765	882643	1001397	984729	1013290	1056211	1110455	1129194	984871	941824	932813	954479	983916	938690	(iZ/i)-butanethiol-S-oxide	(iZ/i)-butanethiol-S-oxide [ C4 H8 O S, tgt=46.88, overall=46.88 ]	(127.01884, 57175.316)(111.00556, 64837.05)	2.0036
(iZ/i)-phenylacetaldehyde oxime	1	1	1	1	1	1	1	1	1	1	1	1	666618	360258	355333	(iZ/i)-phenylacetaldehyde oxime	(iZ/i)-phenylacetaldehyde oxime [ C8 H9 N O, tgt= ]	(136.06963, 1001.8333)(118.0601, 5031.017)	4.353
(R)-adrenaline	1308457	1406650	1347953	1	166630	566947	1281984	1665671	1586875	1129881	1103642	1082180	776864	766067	760019	(R)-adrenaline	(R)-adrenaline [ C9 H14 N O3, tgt= ]	(188.01558, 14858.781)(189.1148, 8883.94)(189.11562, 10610.934)(203.13048, 56364.805)(204.1333, 1457.987)(185.12013, 131.12666)	2.7626
(R)-canadine	591291	112502	645651	1	1	1	1	1	1	1	1	1	1	1	1	(R)-canadine	(R)-canadine [ C20 H21 N O4, tgt= ]	(360.1992, 30954.463)(361.20035, 5554.565)(342.85214, 8822.146)(343.6842, 822.02)	5.16625
(R)-citramalate	2431818	2560629	2562131	2955193	2822487	2817475	2953255	3027339	3045514	2621162	2633130	2579227	2551931	2547150	2541294	(R)-citramalate	(R)-citramalate [ C5 H6 O5, tgt=58.66, overall=58.66 ]	(151.02965, 143840.2)(128.014, 141645.3)(129.0148, 19930.479)(130.01068, 10283.287)(129.01605, 17283.137)(130.01202, 9524.754)(154.00682, 3311.9846)(155.0055, 295.825)	2.0036
(R)-methylmalonyl-CoA	1	1	1	207982	175976	1	1	1	1	1	1	1	1	1	1	(R)-methylmalonyl-CoA	(R)-methylmalonyl-CoA [ C25 H35 N7 O19 P3 S, tgt=8.04, overall=8.04 ]	(881.1385, 1241.3201)(865.1437, 356.385)	23.137
(R)-pantoate	1	1	1	353929	320372	1	1	1	1	1	1	1	1	1	1	(R)-pantoate	(R)-pantoate [ C6 H11 O4, tgt=47.33, overall=47.33 ]	(130.05835, 8838.09)(170.05109, 1132.0701)	5.424
(R)-reticuline	492390	525733	505170	557526	544558	318223	237021	232450	221117	1	1	1	1	1	1	(R)-reticuline	(R)-reticuline [ C19 H24 N O4, tgt=49.07, overall=49.07 ]	(317.06897, 6775.8335)(318.18768, 7594.38)(330.18768, 8715.527)(331.1825, 1917.8234)(338.16055, 4046.57)	2.833
(S)-autumnaline	1446866	1633229	1	6646888	6680454	6748417	2017050	2046708	2059566	510347	458405	517170	553063	538992	361092	(S)-autumnaline	(S)-autumnaline [ C21 H28 N O5, tgt=39.52, overall=39.52 ]	(374.60464, 4260.254)(358.55722, 6215.552)(360.19873, 16461.06)(361.20013, 4710.5303)(378.21948, 11366.985)(379.22186, 842.21497)(392.2356, 86021.69)(393.23795, 11400.968)(374.80188, 6037.8696)(377.46826, 50296.434)(379.22272, 10366.785)(399.19336, 1236.8365)(380.1748, 10378.009)(381.17947, 772.64667)	4.33587
(S)-coclaurine	3935027	4140289	4052642	1575855	1514886	1523225	1	1	1	1	1	664579	936294	909441	1029889	(S)-coclaurine	(S)-coclaurine [ C17 H20 N O3, tgt=41.45, overall=41.45 ]	(289.1526, 8135.1855)(290.1587, 204.41)(269.14813, 54770.156)(270.15076, 1832.8234)(304.17007, 4248.378)(286.16394, 23842.988)(287.1676, 4766.7734)(294.13297, 3837.3599)	2.477
(S)-corytuberine	1	1	1	883435	918237	913411	257065	273793	282236	1	1	1	1	1	1	(S)-corytuberine	(S)-corytuberine [ C19 H22 N O4, tgt=39.49, overall=39.49 ]	(333.1749, 1176.63)(316.17123, 7526.61)(346.18115, 11978.672)(347.1765, 169.32333)(330.1868, 6902.4785)(338.15555, 5077.067)	3.0742
(S)-isoandrocymbine	354805	401129	394717	552017	543510	554720	1	1	1	1	1	1	1	1	1	(S)-isoandrocymbine	(S)-isoandrocymbine [ C21 H26 N O5, tgt=49.52, overall=49.52 ]	(373.19028, 12721.75)(374.19125, 3264.1667)(358.6962, 9399.795)(360.1993, 21369.646)(374.70816, 9635.52)(375.21042, 8321.434)	2.5982
(S)-methylmalonyl-CoA	1	1	1	207982	175976	1	1	1	1	1	1	1	1	1	1	(S)-methylmalonyl-CoA	(S)-methylmalonyl-CoA [ C25 H35 N7 O19 P3 S, tgt=8.04, overall=8.04 ]	(881.1385, 1241.3201)(865.1437, 356.385)	23.137
(S)-nandinine	1	1	1	1	1	1	1	1	1	701597	662610	666178	1	1	1	(S)-nandinine	(S)-nandinine [ C19H19NO4, tgt= ]	(311.12537, 7743.3267)(313.14026, 1175.7301)(326.15195, 23734.576)	4.8366
(S)-n-methylcanadine	1	1	1	7099525	7050148	6989639	729052	753452	694128	377052	394768	394368	1	1	1	(S)-n-methylcanadine	(S)-n-methylcanadine [ C21 H24 N O4, tgt=38.49, overall=38.49 ]	(360.19968, 393.69144)(339.17706, 814.23334)(374.21155, 4410.4785)(376.20593, 1757.268)(357.20404, 2916.1887)(358.20273, 1960.6519)(359.2115, 3819.5352)(359.1527, 94.48)	4.37125
(S)-norcoclaurine	1	1	1	522818	508354	512050	2148629	2220339	2156307	388754	407430	372248	618724	619873	608157	(S)-norcoclaurine	(S)-norcoclaurine [ C16 H18 N O3, tgt=46.28, overall=46.28 ]	(277.14243, 1640.4349)(257.1331, 2693.2234)(276.39825, 4503.9526)(256.13318, 4191.7295)(290.15695, 7742.16)(272.14926, 1806.4933)(297.115, 9636.62)(277.8589, 13215.352)	3.5988
(S)-norlaudanine	492390	525733	505170	557526	544558	318223	237021	232450	221117	1	1	1	1	1	1	(S)-norlaudanine	(S)-norlaudanine [ C19 H24 N O4, tgt=49.07, overall=49.07 ]	(317.06897, 6775.8335)(318.18768, 7594.38)(330.18768, 8715.527)(331.1825, 1917.8234)(338.16055, 4046.57)	2.833
(S)-norreticuline	1	1	1	872134	845220	862675	1	1	1	137168	137164	144208	1	1	1	(S)-norreticuline	(S)-norreticuline [ C18 H22 N O4, tgt=36.72, overall=36.72 ]	(320.16315, 3271.7)(303.151, 279.80334)(317.1696, 4036.7136)(304.16733, 13064.782)(316.17236, 7674.3555)(317.16833, 4593.283)	2.5792
(S)-tetrahydropapaverine	601265	652506	657033	869003	286560	810589	378181	387410	368835	725620	721515	731033	631525	637336	632031	(S)-tetrahydropapaverine	(S)-tetrahydropapaverine [ C20 H26 N O4, tgt=40.16, overall=40.16 ]	(345.68576, 3221.825)(345.20093, 10242.647)(346.21643, 2099.2532)(330.11105, 5267.1274)(332.12485, 12826.846)(332.2037, 15543.07)(346.21692, 7879.2153)(371.1782, 1005.4467)(351.6006, 1703.3158)(352.1721, 1828.25)	2.9918
[1-(2-amino-7-methyl-4-oxo-7,8-dihydro-3H-pteridin-6-yl)]ethyl-4-(&beta;-D-ribofuranosyl)aminobenzene 5'-phosphate	1	1	1	1	1	1	408027	315590	79161	1	1	1	1	1	1	[1-(2-amino-7-methyl-4-oxo-7,8-dihydro-3H-pteridin-6-yl)]ethyl-4-(&beta;-D-ribofuranosyl)aminobenzene 5'-phosphate	[1-(2-amino-7-methyl-4-oxo-7,8-dihydro-3H-pteridin-6-yl)]ethyl-4-(&beta;-D-ribofuranosyl)aminobenzene 5'-phosphate [ C20 H25 N6 O8 P, tgt= ]	(509.18002, 52556.49)(510.18262, 8911.837)	11.119
1-(&beta;-D ribofuranosyl)nicotinamide	1	1	1	1	249109	243583	1	1	1	1	1	1	1	1	1	1-(&beta;-D ribofuranosyl)nicotinamide	1-(&beta;-D ribofuranosyl)nicotinamide [ C11 H15 N2 O5, tgt=0.63, overall=0.63 ]	(258.09784, 8347.721)(276.147, 4426.395)	2.28
1-(2-amino-2-deoxy-&alpha;-D-glucopyranosyl)-1D-myo-inositol	1	1	1	1	1	1	173788	183346	171356	1	1	1	2464186	2471967	2564874	1-(2-amino-2-deoxy-&alpha;-D-glucopyranosyl)-1D-myo-inositol	1-(2-amino-2-deoxy-&alpha;-D-glucopyranosyl)-1D-myo-inositol [ C12 H24 N O10, tgt=40.60, overall=40.60 ]	(324.1307, 6948.693)(360.17783, 31983.791)(361.17874, 3592.36)(346.18143, 4356.4497)	4.73975
1-(3,4-dihydroxyphenyl)-5-hydroxy-3-decanone	3643474	3721313	3675643	6972742	6988147	7130062	10044186	10224835	10124695	4840509	4922239	4630790	3963255	3986196	3913832	1-(3,4-dihydroxyphenyl)-5-hydroxy-3-decanone	1-(3,4-dihydroxyphenyl)-5-hydroxy-3-decanone [ C16 H24 O4, tgt=14.88, overall=14.88 ]	(280.16144, 71845.66)(281.16293, 3212.9958)(285.1807, 912.05)(263.16562, 99141.6)(264.16736, 9543.767)(299.1957, 3273.54)(304.15402, 29195.453)(306.04968, 3139.9133)(307.50717, 2959.3435)(308.1793, 6819.48)(287.15768, 11529.594)	4.1952
1,1-kestotetraose	4445448	4544488	4374094	1	1	1	1	1	1	1	1	1	1	1	1	1,1-kestotetraose	1,1-kestotetraose [ C24 H42 O21, tgt= ]	(667.26715, 108654.96)(668.2696, 26087.703)(669.2715, 1920.0668)	5.6596
1,2,3,6-tetrakis-O-galloyl-&beta;-D-glucose	701626	741165	775297	1126219	271312	267066	1351943	366607	360185	322204	307498	317299	390179	1325600	373321	1,2,3,6-tetrakis-O-galloyl-&beta;-D-glucose	1,2,3,6-tetrakis-O-galloyl-&beta;-D-glucose [ C34 H28 O22, tgt=30.43, overall=30.43 ]	(793.09674, 7528.6123)(771.08124, 7185.896)(792.11115, 69138.52)(793.11255, 7583.983)(771.0836, 12108.632)(814.4652, 3208.5078)(813.4524, 3869.2031)(814.1225, 11025.38)(793.3641, 6246.38)(795.0882, 1389.7201)	22.2856
1,2-dehydroreticulinium	1	1	1	883435	918237	913411	257065	273793	282236	1	1	1	1	1	1	1,2-dehydroreticulinium	1,2-dehydroreticulinium [ C19 H22 N O4, tgt=39.49, overall=39.49 ]	(333.1749, 1176.63)(316.17123, 7526.61)(346.18115, 11978.672)(347.1765, 169.32333)(330.1868, 6902.4785)(338.15555, 5077.067)	3.0742
1,2-dibutyrin	11449934	12171488	12160651	7532091	7433251	7436476	11869447	12299909	12393191	8393458	8489424	3460476	7502300	7492662	7510139	1,2-dibutyrin	1,2-dibutyrin [ C11 H20 O5, tgt=71.28, overall=71.28 ]	(233.13857, 42154.316)(215.12862, 5512.0566)(233.13994, 92627.96)(234.14247, 4409.591)(215.13005, 9995.0)(216.1328, 438.08)(236.1627, 3673.0)(257.00623, 1093.535)(237.11314, 30157.967)(238.11583, 2305.98)	2.726
1,2-dihydrovomilenine	1	1	1	4041636	4055169	4047850	1	1	1	1	1	1	1	1	1	1,2-dihydrovomilenine	1,2-dihydrovomilenine [ C21 H24 N2 O3, tgt=47.23, overall=47.23 ]	(352.16907, 1052.9834)(334.15994, 68475.29)(335.16232, 6005.6934)(371.2089, 4301.2935)(373.22574, 10166.793)(379.17834, 1015.95)	2.962
1,2-dihydroxy-5-(methylthio)pent-1-en-3-one	1090468	1165300	1191259	1	1	268756	1013075	1055186	1046478	211991	198443	204357	462505	473007	447480	1,2-dihydroxy-5-(methylthio)pent-1-en-3-one	1,2-dihydroxy-5-(methylthio)pent-1-en-3-one [ C6 H9 O3 S, tgt=44.80, overall=44.80 ]	(161.02274, 20779.75)(162.02422, 1198.9917)(163.02037, 756.59)(143.0136, 1051.6666)(145.02881, 2293.2793)	2.219
1,2-di-iS/i-octyl-1,2-dimercapto-3-propanol	1	1	1	1462576	1430273	3914109	4720075	4574477	4563908	1	1	1	1	1	1	1,2-di-iS/i-octyl-1,2-dimercapto-3-propanol	1,2-di-iS/i-octyl-1,2-dimercapto-3-propanol [ C19 H40 O S2, tgt=18.41, overall=18.41 ]	(348.2581, 39306.61)(349.2609, 2487.1619)	9.42
1,2-dioctanoyl-1-amino-2,3-propanediol	180987	202332	185593	1298273	1274556	1294956	1579783	1499795	1450817	1	1	1	1	1	182569	1,2-dioctanoyl-1-amino-2,3-propanediol	1,2-dioctanoyl-1-amino-2,3-propanediol [ C19 H37 N O4, tgt=18.11, overall=18.11 ]	(366.27075, 10734.811)(348.65274, 25030.906)(349.2609, 2479.925)	9.28746
1,2-dipalmitoyl-phosphatidylcholine	6547945	6736728	611411	6938295	6716453	6552695	244552	225261	7469406	212123	210750	7001000	6961934	209602	226157	1,2-dipalmitoyl-phosphatidylcholine	1,2-dipalmitoyl-phosphatidylcholine [ C40 H80 N O8 P, tgt=68.08, overall=68.08 ]	(734.0272, 56895.0)(734.67847, 30461.285)(719.5491, 1569.7626)(719.5512, 38865.832)(720.5531, 12082.992)(759.77655, 47928.797)(757.5751, 278.68)(741.06085, 2946.9834)(741.7054, 8896.285)(742.56323, 1243.0383)	22.459
1,2-dipalmitoyl-phosphatidylglycerol-phosphate	3885976	3873952	3822020	172076	1	1	1	1	1	1	1	1	119674	118310	113159	1,2-dipalmitoyl-phosphatidylglycerol-phosphate	1,2-dipalmitoyl-phosphatidylglycerol-phosphate [ C38 H73 O13 P2, tgt=13.28, overall=13.28 ]	(805.4573, 7069.1997)(804.9385, 74829.37)(805.4223, 52284.426)(806.424, 7429.047)(799.4933, 8782.15)(800.4961, 1823.31)	14.5954
1,3,7-trimethyl-5-hydroxyisourate	1	1	1	1	1	1	1	1	1	1	1	1	12696404	12721595	12833544	1,3,7-trimethyl-5-hydroxyisourate	1,3,7-trimethyl-5-hydroxyisourate [ C8 H12 N4 O4, tgt= ]	(251.08203, 354110.47)(252.08484, 34928.754)(253.08636, 799.1167)	6.314
1,3-dioctanoyl-1,2,3-butanetriol	2500124	2435287	2427215	1	1	1	1	1	1	1	1	1	1	1	1	1,3-dioctanoyl-1,2,3-butanetriol	1,3-dioctanoyl-1,2,3-butanetriol [ C20 H38 O5, tgt=17.53, overall=17.53 ]	(383.26138, 32673.346)(384.26248, 2449.2334)	5.497
1,3-propanediol-P	1	1	1	107630	1	93246	1	1	1	1	1	1	1	1	1	1,3-propanediol-P	1,3-propanediol-P [ C3 H7 O5 P, tgt=49.62, overall=49.62 ]	(154.00586, 6943.865)(155.0055, 383.345)	2.071
1,4-&beta;-D-glucan	4445448	4544488	4374094	1	1	1	1	1	1	1	1	1	1	1	1	1,4-&beta;-D-glucan	1,4-&beta;-D-glucan [ C24 H42 O21, tgt= ]	(667.26715, 108654.96)(668.2696, 26087.703)(669.2715, 1920.0668)	5.6596
1,5-dideoxy-1,5-imino-D-galactitol	1	1	1	1	1	1	290228	289062	1	1	1	1	1	1	1	1,5-dideoxy-1,5-imino-D-galactitol	1,5-dideoxy-1,5-imino-D-galactitol [ C6 H14 N O4, tgt= ]	(146.08545, 10985.395)(191.09409, 772.75)	2.295
1,6,7,8-tetrahydroxy-2-methylanthraquinone	1	1	1	1	1	1	1	1	1	2859638	2884991	2933708	1	1	1	1,6,7,8-tetrahydroxy-2-methylanthraquinone	1,6,7,8-tetrahydroxy-2-methylanthraquinone [ C15 H9 O6, tgt= ]	(285.06412, 101108.93)(286.06693, 8111.5034)	8.37675
1,6,7-trihydroxy-2-methylanthraquinone	1	1	1	1	1	1	1	1	1	4107353	4194490	4286045	1	1	1	1,6,7-trihydroxy-2-methylanthraquinone	1,6,7-trihydroxy-2-methylanthraquinone [ C15 H10 O5, tgt= ]	(271.04932, 125649.4)(272.05197, 9997.133)(255.05412, 1694.7401)	9.4118
1,6-kestotetraose	4445448	4544488	4374094	1	1	1	1	1	1	1	1	1	1	1	1	1,6-kestotetraose	1,6-kestotetraose [ C24 H42 O21, tgt= ]	(667.26715, 108654.96)(668.2696, 26087.703)(669.2715, 1920.0668)	5.6596
10&beta;,14&beta;-dihydroxytaxa-4(20),11-dien-5&alpha;-yl acetate	1805496	1997174	1877148	3803769	3858989	1938102	11837268	12141994	12128297	2283030	2391443	2173760	7887253	7503017	7933054	10&beta;,14&beta;-dihydroxytaxa-4(20),11-dien-5&alpha;-yl acetate	10&beta;,14&beta;-dihydroxytaxa-4(20),11-dien-5&alpha;-yl acetate [ C22 H34 O4, tgt=51.08, overall=51.08 ]	(344.23923, 88636.6)(345.24167, 8411.518)(346.23938, 132.61)(386.14505, 2417.798)	4.5536
10,11-epoxy-3-geranylgeranylindole	1	1	1	1	1	1	1	1	1	1	4714508	4514204	1	1	1	10,11-epoxy-3-geranylgeranylindole	10,11-epoxy-3-geranylgeranylindole [ C28 H39 N O, tgt= ]	(429.28827, 102391.734)(430.2906, 14447.07)	6.524
10-deacetyl-2-debenzoylbaccatin III	788134	825464	790387	196668	192695	181457	1384872	1449205	1384542	1862695	1902719	1863599	841174	232729	567006	10-deacetyl-2-debenzoylbaccatin III	10-deacetyl-2-debenzoylbaccatin III [ C22 H32 O9, tgt=26.96, overall=26.96 ]	(441.2026, 8970.3125)(422.86282, 582.38336)(441.20337, 16076.753)(442.20917, 952.83)(424.10663, 20599.746)(427.22037, 8794.604)(459.7454, 323.43335)(444.13208, 5793.2866)(445.9119, 2330.1565)(446.24194, 1217.145)(466.53537, 7346.224)(469.20935, 9090.43)(446.69058, 1165.8184)	4.9174
10-deacetylbaccatin III	561179	624926	579940	2709812	2723863	2751363	243479	246590	228807	19027276	19383126	18938472	2430913	2402869	2490113	10-deacetylbaccatin III	10-deacetylbaccatin III [ C29 H36 O10, tgt=46.35, overall=46.35 ]	(547.2416, 303.725)(528.22076, 11588.405)(529.21387, 4879.34)(528.2201, 11684.03)(562.2574, 211709.77)(563.26, 56569.336)(564.26697, 10340.455)(544.54224, 19788.332)(545.25665, 7052.654)(546.26886, 1563.7733)	6.08
10-deoxysarpagine	882153	943523	923097	776752	756272	783902	1	1	1	460004	443380	460332	1	1	1	10-deoxysarpagine	10-deoxysarpagine [ C19 H22 N2 O, tgt=24.46, overall=24.46 ]	(294.1677, 7638.375)(276.15808, 3910.36)(295.18845, 19649.984)(316.21008, 7179.7676)(318.83743, 3514.3755)(304.16565, 12121.968)	2.5606
11&alpha;,30-dihydroxy-&beta;-amyrin	1	1	1	1	1	1	1	1	1	1	1	1	1465962	1395187	1	11&alpha;,30-dihydroxy-&beta;-amyrin	11&alpha;,30-dihydroxy-&beta;-amyrin [ C30 H50 O3, tgt= ]	(482.38275, 22620.1)(483.386, 1410.6)(468.36963, 3805.37)	15.4043
1-16:0-2-18:1-phosphatidylcholine	429306	451999	756940	2061847	351962	337577	495759	514802	3100516	651153	2868906	2914077	3822970	3894751	3817425	1-16:0-2-18:1-phosphatidylcholine	1-16:0-2-18:1-phosphatidylcholine [ C42 H82 N O8 P, tgt=51.82, overall=51.82 ]	(763.07965, 25867.91)(764.0426, 11551.848)(764.5774, 1291.9667)(741.56213, 10308.319)(742.5626, 3630.3735)(762.5914, 75466.99)(763.5939, 28047.1)(748.5752, 7379.21)(777.59125, 30380.951)(778.5928, 12062.269)(784.87445, 3640.9429)(785.7857, 6023.27)(785.98975, 2418.7642)(786.5684, 986.85)(766.2325, 2474.0203)(770.0795, 3510.3103)(770.58154, 8684.71)	22.2506
1-16:0-2-18:3-diacylglycerol-trimethylhomoserine	183299	229726	1	1	1	1	184177	178051	188140	4412424	4372252	120720	357463	349130	346933	1-16:0-2-18:3-diacylglycerol-trimethylhomoserine	1-16:0-2-18:3-diacylglycerol-trimethylhomoserine [ C44 H79 N O7, tgt=52.48, overall=52.48 ]	(733.56555, 105540.42)(734.5681, 35282.6)(752.6276, 13823.458)(753.63055, 3110.6267)(756.5728, 2892.7542)(740.5607, 4711.447)(741.5644, 10352.624)(742.5661, 1275.1434)	21.6788
1-16:0-2-18:3-phosphatidylcholine	1124570	1175915	1209474	1123651	1086502	1067632	82925	1215782	82827	1128134	1096136	1114129	1160560	1168953	1159452	1-16:0-2-18:3-phosphatidylcholine	1-16:0-2-18:3-phosphatidylcholine [ C42 H78 N O8 P, tgt=55.79, overall=55.79 ]	(756.5642, 2918.705)(741.4277, 935.0767)(741.55994, 9820.04)(742.5625, 1012.875)(762.58716, 77089.06)(777.58923, 26475.145)(778.5914, 9506.066)(755.5772, 19983.637)(756.5794, 5564.046)(765.56067, 3013.254)	22.606
1-16:0-2-18:4-diacylglycerol-trimethylhomoserine	644000	713748	624431	561887	539142	491539	852443	831816	823427	720234	712454	722649	880525	916878	739449	1-16:0-2-18:4-diacylglycerol-trimethylhomoserine	1-16:0-2-18:4-diacylglycerol-trimethylhomoserine [ C44 H77 N O7, tgt=37.11, overall=37.11 ]	(734.55865, 6183.32)(735.56, 1072.18)(713.5445, 3091.3264)(756.5665, 3075.0735)(757.5685, 587.87)(740.55817, 2706.4932)(741.5622, 13374.338)(742.5628, 3739.9229)	22.1526
1-16:0-2-lysophosphatidylcholine	1	1	1	3207939	3621416	4469157	133695	127416	197754	12586993	12206331	12625305	667532	517172	661704	1-16:0-2-lysophosphatidylcholine	1-16:0-2-lysophosphatidylcholine [ C24 H50 N O7 P, tgt=13.61, overall=13.61 ]	(498.67615, 2135.1233)(499.3483, 3752.23)(483.33942, 3068.435)(513.3627, 7367.87)(520.98816, 80633.77)(522.329, 20466.451)(523.3355, 83446.26)(523.33685, 47909.074)(524.3388, 4179.8135)	16.7208
1-18:0-2-18:1-phosphatidylethanolamine	560648	597808	612722	272523	228973	203980	371338	350561	359948	312357	295338	295534	942528	1969011	945175	1-18:0-2-18:1-phosphatidylethanolamine	1-18:0-2-18:1-phosphatidylethanolamine [ C41 H80 N O8 P, tgt=45.92, overall=45.92 ]	(748.56976, 42792.32)(749.571, 16564.389)(727.5492, 2128.0422)(728.5506, 560.1067)(748.5747, 38831.156)(749.5765, 14558.133)(733.9634, 4524.836)(734.56055, 6176.8633)(763.5774, 7274.607)(764.5773, 1492.7344)(770.99677, 5486.8027)(771.4128, 4496.373)(771.5774, 3227.82)(751.5489, 1561.7899)(756.36816, 3133.8572)(756.5706, 3720.7651)	21.9204
1-18:0-2-18:2-phosphatidylethanolamine	1	1	1	3261743	3183629	3115640	3666340	3584242	3550210	3344356	3299684	3314933	3498936	3515073	3437014	1-18:0-2-18:2-phosphatidylethanolamine	1-18:0-2-18:2-phosphatidylethanolamine [ C41 H78 N O8 P, tgt=60.06, overall=60.06 ]	(748.5686, 9606.486)(749.57086, 2539.2458)(725.5524, 4642.325)(726.5566, 12323.176)(727.5586, 3051.8516)(762.58466, 69282.73)(763.58685, 26251.936)	22.7706
1-18:0-2-18:3-phosphatidylethanolamine	856298	901031	598669	790382	758506	747627	1	1026287	1010543	1029453	954002	990120	1	1	1	1-18:0-2-18:3-phosphatidylethanolamine	1-18:0-2-18:3-phosphatidylethanolamine [ C41 H76 N O8 P, tgt=52.31, overall=52.31 ]	(727.5467, 1488.7635)(748.5721, 46629.266)(763.5742, 7589.65)(764.5758, 1857.5)(741.5621, 13980.513)(742.5627, 4503.191)(751.54553, 1488.105)	21.9651
1-18:0-2-18:4-phosphatidylethanolamine	201799	210267	1	654851	639459	560941	291334	293116	270284	684071	1	1438156	780384	741294	729710	1-18:0-2-18:4-phosphatidylethanolamine	1-18:0-2-18:4-phosphatidylethanolamine [ C41 H74 N O8 P, tgt=35.93, overall=35.93 ]	(740.805, 4388.054)(745.5205, 1469.1901)(721.847, 1497.2244)(722.4949, 538.1667)(722.5317, 3643.6433)(761.639, 5563.14)(761.5561, 191.33)(740.5573, 2572.1885)(741.56134, 13066.454)(742.5622, 3375.8079)(764.53204, 484.00668)(750.52606, 955.7266)	20.6872
1-18:1-2-16:0-monogalactosyldiacylglycerol	2639566	2736011	1	2824035	191846	282913	203412	172716	209228	172833	167378	2828275	2976113	2970300	2912340	1-18:1-2-16:0-monogalactosyldiacylglycerol	1-18:1-2-16:0-monogalactosyldiacylglycerol [ C43 H80 O10, tgt=47.57, overall=47.57 ]	(756.56903, 3019.4949)(762.58673, 87577.914)(763.58923, 33053.125)(740.6997, 3869.7712)(741.70306, 9882.507)(742.5608, 2602.288)(756.5805, 4199.608)(782.7969, 3338.1128)(785.0086, 9485.327)(785.5997, 4805.874)(764.5684, 3874.0698)(764.5721, 625.4667)	22.6752
1-18:1-2-16:0-phosphatidate	2467289	2518934	2521382	1218608	1198252	1195576	4611996	4623927	4571141	735006	742115	717110	4093398	4141367	4195618	1-18:1-2-16:0-phosphatidate	1-18:1-2-16:0-phosphatidate [ C37 H69 O8 P, tgt=26.68, overall=26.68 ]	(674.47644, 114474.055)(675.4792, 31059.068)(676.4823, 4962.701)(657.4525, 4320.14)	11.4486
1-18:1-2-16:0-phosphatidylglycerol	1984943	2083985	1541135	1992655	1474960	1459466	2392820	230825	219667	1634544	1615724	1610756	436333	433493	2320395	1-18:1-2-16:0-phosphatidylglycerol	1-18:1-2-16:0-phosphatidylglycerol [ C40 H76 O10 P, tgt=26.17, overall=26.17 ]	(751.54895, 1655.558)(732.5152, 11617.405)(731.5019, 2913.415)(768.84766, 1836.588)(770.58105, 11598.68)(771.5818, 3752.6267)(750.39386, 17207.299)(750.8864, 6748.3965)(751.544, 1005.32)(774.52344, 4203.0)(775.5279, 754.095)	19.6468
1-18:1-2-16:1-monogalactosyldiacylglycerol	157062	166977	1554282	1829426	1753115	1570452	3224420	2928807	585368	180506	174564	163706	262013	270539	270589	1-18:1-2-16:1-monogalactosyldiacylglycerol	1-18:1-2-16:1-monogalactosyldiacylglycerol [ C43 H78 O10, tgt=37.66, overall=37.66 ]	(755.953, 6115.4565)(757.5704, 2011.4532)(739.6984, 4604.052)(742.4528, 2631.1377)(755.7404, 12241.716)(756.57666, 4293.8843)(741.05853, 1471.83)(741.55975, 7801.783)(742.56104, 1262.9701)(777.58856, 37200.52)(778.59094, 16486.402)(754.5786, 6021.62)(781.7748, 1277.07)(783.5896, 925.14)(764.9933, 3442.23)	22.0164
1-18:1-2-16:2-monogalactosyldiacylglycerol	1	1	1	419301	408937	1152021	1384016	1333886	1	460623	457657	1399803	1693004	1707252	1152574	1-18:1-2-16:2-monogalactosyldiacylglycerol	1-18:1-2-16:2-monogalactosyldiacylglycerol [ C43 H76 O10, tgt=59.74, overall=59.74 ]	(756.5635, 1080.1799)(734.7531, 3393.774)(736.5451, 1099.33)(740.5591, 1253.69)(754.5744, 2312.4675)(755.57837, 6043.3975)(756.57404, 3554.07)(757.5704, 449.995)(737.95056, 2335.9321)(740.4569, 6814.586)(741.5639, 9091.36)(770.5805, 7844.725)(771.58124, 2368.2717)(755.36786, 2674.4739)(755.5744, 13763.363)(756.5767, 3786.8665)(780.56793, 749.06757)	20.7572
1-18:1-2-16:3-monogalactosyldiacylglycerol	1	1	1	1655633	1	1	1	1	1	1	1	1	1	1	1	1-18:1-2-16:3-monogalactosyldiacylglycerol	1-18:1-2-16:3-monogalactosyldiacylglycerol [ C43 H74 O10, tgt=43.11, overall=43.11 ]	(736.5395, 2821.73)(770.5766, 3239.66)(771.5791, 601.46)(754.5683, 4246.05)(755.5724, 14949.09)(756.5747, 4154.98)	21.011
1-18:1-2-18:1-phosphatidate	203017	217218	210545	116851	392657	385062	196214	188697	362877	211673	203402	199959	841916	833088	827717	1-18:1-2-18:1-phosphatidate	1-18:1-2-18:1-phosphatidate [ C39 H71 O8 P, tgt=45.62, overall=45.62 ]	(700.49194, 21242.412)(701.4945, 4140.406)(705.5326, 6561.2603)(720.1415, 10497.353)(720.5475, 7797.065)(722.5261, 482.54498)(698.5251, 6603.15)(699.52783, 606.44)	16.0141
1-18:1-2-18:1-phosphatidylethanolamine	186481	184465	198012	3261743	3183629	3115640	3666340	3584242	3550210	3344356	3299684	3314933	3498936	3515073	3437014	1-18:1-2-18:1-phosphatidylethanolamine	1-18:1-2-18:1-phosphatidylethanolamine [ C41 H78 N O8 P, tgt=60.06, overall=60.06 ]	(748.76764, 8431.658)(749.57086, 2539.2458)(725.9522, 5260.039)(749.56366, 3732.3435)(726.7556, 11404.72)(727.5586, 3051.8516)(762.58466, 69282.73)(763.58685, 26251.936)(749.5653, 4128.17)	22.5408
1-18:1-2-18:1-sn-glycerol-3-phosphocholine	2546427	2629392	2644816	171362	787591	781972	121779	229567	126030	119924	2723104	2735017	3009691	3019482	2959617	1-18:1-2-18:1-sn-glycerol-3-phosphocholine	1-18:1-2-18:1-sn-glycerol-3-phosphocholine [ C44 H84 N O8 P, tgt=47.34, overall=47.34 ]	(785.58746, 3276.928)(791.6076, 83784.375)(792.61017, 34055.285)(769.86176, 2638.05)(770.86505, 5795.37)(771.5799, 1921.458)(806.6147, 9045.69)(807.6171, 3048.5)(785.6005, 4647.315)(812.87317, 2423.9146)(813.7436, 12355.432)(814.62, 4616.4956)(793.6547, 3547.2415)(793.59216, 617.055)	22.8448
1-18:1-2-18:2-phosphatidylcholine	117123	135234	1443360	1366971	1309681	1313704	1316287	1122096	160041	139542	1420174	128482	186723	195376	189752	1-18:1-2-18:2-phosphatidylcholine	1-18:1-2-18:2-phosphatidylcholine [ C44 H82 N O8 P, tgt=46.62, overall=46.62 ]	(785.4322, 4456.03)(786.58057, 6179.1523)(769.5779, 3569.1255)(771.1973, 4405.4688)(771.5799, 1755.782)(784.59937, 14827.82)(785.60156, 4828.35)(770.58386, 2305.805)(771.584, 834.38)(806.6078, 36409.285)(807.60925, 16289.045)(784.5913, 6255.1553)(793.0892, 3904.3713)(793.5944, 1155.02)	22.1454
1-18:1-2-18:3-phosphatidylcholine	1	1	303040	344269	1225878	1192778	1423278	1399244	403398	372424	390201	398046	1	1	1	1-18:1-2-18:3-phosphatidylcholine	1-18:1-2-18:3-phosphatidylcholine [ C44 H80 N O8 P, tgt=63.86, overall=63.86 ]	(785.584, 1227.15)(786.5681, 1695.97)(764.2349, 3504.4583)(785.5866, 1234.25)(786.5697, 1676.23)(768.0715, 2971.6025)(770.5798, 9245.189)(799.59973, 6440.172)(800.60016, 2346.3076)(783.59125, 4127.16)(784.59534, 14896.764)(785.5974, 4687.836)(809.5872, 456.79004)	22.1746
1-18:1-2-trans-16:1-phosphatidylglycerol	1	1	1	1	1	1	1	1	1	2545052	2513248	2560231	1	1	1	1-18:1-2-trans-16:1-phosphatidylglycerol	1-18:1-2-trans-16:1-phosphatidylglycerol [ C40 H74 O10 P, tgt= ]	(746.53046, 25763.15)(747.5332, 6153.517)	15.6858
1-18:1-lysophosphatidylethanolamine	1	1	1	1	1	1	1	1	1	1	1	1	1	1	1445297	1-18:1-lysophosphatidylethanolamine	1-18:1-lysophosphatidylethanolamine [ C23H46NO7P, tgt= ]	(484.2934, 21579.76)(485.2954, 1629.35)	4.095
1-18:2-2-16:0-monogalactosyldiacylglycerol	157062	166977	1554282	1829426	1753115	1570452	3224420	2928807	585368	180506	174564	163706	262013	270539	270589	1-18:2-2-16:0-monogalactosyldiacylglycerol	1-18:2-2-16:0-monogalactosyldiacylglycerol [ C43 H78 O10, tgt=37.66, overall=37.66 ]	(755.953, 6115.4565)(757.5704, 2011.4532)(739.6984, 4604.052)(742.4528, 2631.1377)(755.7404, 12241.716)(756.57666, 4293.8843)(741.05853, 1471.83)(741.55975, 7801.783)(742.56104, 1262.9701)(777.58856, 37200.52)(778.59094, 16486.402)(754.5786, 6021.62)(781.7748, 1277.07)(783.5896, 925.14)(764.9933, 3442.23)	22.0164
1-18:2-2-16:0-phosphatidylglycerol	1	1	1	1	1	1	1	1	1	2545052	2513248	2560231	1	1	1	1-18:2-2-16:0-phosphatidylglycerol	1-18:2-2-16:0-phosphatidylglycerol [ C40 H74 O10 P, tgt= ]	(746.53046, 25763.15)(747.5332, 6153.517)	15.6879
1-18:2-2-16:1-monogalactosyldiacylglycerol	1	1	1	419301	408937	1152021	1384016	1333886	1	460623	457657	1399803	1693004	1707252	1152574	1-18:2-2-16:1-monogalactosyldiacylglycerol	1-18:2-2-16:1-monogalactosyldiacylglycerol [ C43 H76 O10, tgt=59.74, overall=59.74 ]	(756.5635, 1080.1799)(734.7531, 3393.774)(736.5451, 1099.33)(740.5591, 1253.69)(754.5744, 2312.4675)(755.57837, 6043.3975)(756.57404, 3554.07)(757.5704, 449.995)(737.95056, 2335.9321)(740.4569, 6814.586)(741.5639, 9091.36)(770.5805, 7844.725)(771.58124, 2368.2717)(755.36786, 2674.4739)(755.5744, 13763.363)(756.5767, 3786.8665)(780.56793, 749.06757)	20.7572
1-18:2-2-16:1-phosphatidate	207447	208060	210829	84466	1	1	364967	381338	373811	1	1	1	707585	705542	705106	1-18:2-2-16:1-phosphatidate	1-18:2-2-16:1-phosphatidate [ C37 H65 O8 P, tgt=42.50, overall=42.50 ]	(669.4479, 2974.84)(654.4386, 2522.96)(656.4585, 2036.51)(686.4763, 19805.102)(687.47906, 3567.8955)	13.6168
1-18:2-2-16:2-monogalactosyldiacylglycerol	1	1	1	1655633	1	1	1	1	1	1	1	1	1	1	1	1-18:2-2-16:2-monogalactosyldiacylglycerol	1-18:2-2-16:2-monogalactosyldiacylglycerol [ C43 H74 O10, tgt=43.11, overall=43.11 ]	(736.5395, 2821.73)(770.5766, 3239.66)(771.5791, 601.46)(754.5683, 4246.05)(755.5724, 14949.09)(756.5747, 4154.98)	21.011
1-18:2-2-16:3-monogalactosyldiacylglycerol	1	1	1	1106836	1089986	1074897	3271995	3273342	3248119	510934	502684	507861	436333	433493	438460	1-18:2-2-16:3-monogalactosyldiacylglycerol	1-18:2-2-16:3-monogalactosyldiacylglycerol [ C43 H72 O10, tgt=55.97, overall=55.97 ]	(730.5014, 20189.295)(731.5041, 4207.8267)(732.5138, 71597.16)(733.5165, 20305.166)(734.5184, 4805.74)(776.0342, 7497.7964)(776.53436, 2784.557)	12.7782
1-18:2-2-18:1-phosphatidylcholine	117123	135234	1443360	1366971	1309681	1313704	1316287	1122096	160041	139542	1420174	128482	186723	195376	189752	1-18:2-2-18:1-phosphatidylcholine	1-18:2-2-18:1-phosphatidylcholine [ C44 H82 N O8 P, tgt=46.62, overall=46.62 ]	(785.4322, 4456.03)(786.58057, 6179.1523)(769.5779, 3569.1255)(771.1973, 4405.4688)(771.5799, 1755.782)(784.59937, 14827.82)(785.60156, 4828.35)(770.58386, 2305.805)(771.584, 834.38)(806.6078, 36409.285)(807.60925, 16289.045)(784.5913, 6255.1553)(793.0892, 3904.3713)(793.5944, 1155.02)	22.1454
1-18:2-2-18:2-monogalactosyldiacylglycerol	1100752	1157544	1084350	1	1743145	1844425	1264449	132406	1226839	1150596	1161946	1168724	1290618	1315562	1278335	1-18:2-2-18:2-monogalactosyldiacylglycerol	1-18:2-2-18:2-monogalactosyldiacylglycerol [ C45 H78 O10, tgt=56.06, overall=56.06 ]	(780.3707, 2337.2388)(782.24054, 1776.2667)(785.5857, 1196.95)(763.57477, 4134.6094)(764.5747, 1330.75)(798.8719, 2924.0781)(799.8752, 7538.895)(800.603, 3552.926)(778.59283, 24439.564)(785.0526, 10628.667)(784.5394, 268.655)	22.9246
1-18:2-2-18:2-sn-glycerol-3-phosphocholine	1	1	303040	344269	1225878	1192778	1423278	1399244	403398	372424	390201	398046	1	1	1	1-18:2-2-18:2-sn-glycerol-3-phosphocholine	1-18:2-2-18:2-sn-glycerol-3-phosphocholine [ C44 H80 N O8 P, tgt=63.86, overall=63.86 ]	(785.584, 1227.15)(786.5681, 1695.97)(764.2349, 3504.4583)(785.5866, 1234.25)(786.5697, 1676.23)(768.0715, 2971.6025)(770.5798, 9245.189)(799.59973, 6440.172)(800.60016, 2346.3076)(783.59125, 4127.16)(784.59534, 14896.764)(785.5974, 4687.836)(809.5872, 456.79004)	22.1746
1-18:2-2-18:3-monogalactosyldiacylglycerol	1	1	1	3425714	2778596	2245131	2717506	2678001	2651868	1	2480735	2477463	1	1	1	1-18:2-2-18:3-monogalactosyldiacylglycerol	1-18:2-2-18:3-monogalactosyldiacylglycerol [ C45 H76 O10, tgt=49.06, overall=49.06 ]	(765.5602, 246.46002)(799.3477, 6897.84)(800.3494, 4482.025)(800.6012, 3156.56)(777.5879, 44267.387)(778.58954, 17656.8)(780.5664, 795.6415)	20.8124
1-18:2-2-18:3-phosphatidylcholine	1	1	1	2834309	1167493	1	1	1	1	189568	1	1	1	1	1	1-18:2-2-18:3-phosphatidylcholine	1-18:2-2-18:3-phosphatidylcholine [ C44 H78 N O8 P, tgt=38.71, overall=38.71 ]	(765.5591, 2675.9849)(799.59644, 3022.385)(800.5984, 469.385)(785.5858, 5283.97)(784.25385, 4029.457)(784.59216, 13858.735)(785.5942, 4243.82)	20.391
1-18:2-2-trans-16:1-phosphatidylglycerol	1	1	1	1	1	1	1	420868	1	1	1	1	391311	414990	399656	1-18:2-2-trans-16:1-phosphatidylglycerol	1-18:2-2-trans-16:1-phosphatidylglycerol [ C40 H72 O10 P, tgt= ]	(762.52527, 21108.258)(763.528, 4607.2)	11.734
1-18:3-2-16:0-monogalactosyldiacylglycerol	1200508	1290480	1297561	419301	408937	1152021	1384016	1333886	1	460623	457657	1399803	1693004	1707252	1152574	1-18:3-2-16:0-monogalactosyldiacylglycerol	1-18:3-2-16:0-monogalactosyldiacylglycerol [ C43 H76 O10, tgt=59.74, overall=59.74 ]	(756.5635, 1080.1799)(735.4263, 2909.1174)(739.558, 1244.0275)(740.5591, 1253.69)(754.5744, 2312.4675)(755.57837, 6043.3975)(756.57404, 3554.07)(757.5704, 449.995)(737.5523, 2049.7278)(740.4569, 6814.586)(741.5639, 9091.36)(770.58167, 7491.596)(771.5824, 2239.625)(755.0713, 2469.71)(755.5777, 9928.813)(756.57684, 3682.875)(757.5751, 67.79)(780.56793, 749.06757)	22.1402
1-18:3-2-16:0-phosphatidylglycerol	197870	208479	198898	1	1	1	423949	420868	442714	1	1	1	391311	414990	399656	1-18:3-2-16:0-phosphatidylglycerol	1-18:3-2-16:0-phosphatidylglycerol [ C40 H72 O10 P, tgt= ]	(762.52637, 16981.395)(763.52924, 3475.01)(744.5122, 11599.54)(745.51495, 1937.27)	11.9983
1-18:3-2-16:1-monogalactosyldiacylglycerol	2518503	2601171	2585704	1655633	1359523	1337046	4358256	4360531	4320695	621467	615852	629616	4410496	4468736	4502520	1-18:3-2-16:1-monogalactosyldiacylglycerol	1-18:3-2-16:1-monogalactosyldiacylglycerol [ C43 H74 O10, tgt=43.11, overall=43.11 ]	(732.7843, 88060.4)(733.519, 27637.488)(734.5217, 4296.817)(770.5766, 3239.66)(771.5791, 601.46)(754.5683, 4246.05)(755.5724, 14949.09)(756.5747, 4154.98)(776.5396, 11364.673)(777.5435, 4235.671)	12.7797
1-18:3-2-16:2-monogalactosyldiacylglycerol	1	318125	333935	1106836	1089986	1074897	3271995	3273342	3248119	510934	502684	507861	436333	433493	438460	1-18:3-2-16:2-monogalactosyldiacylglycerol	1-18:3-2-16:2-monogalactosyldiacylglycerol [ C43 H72 O10, tgt=55.97, overall=55.97 ]	(748.51276, 9710.625)(749.5156, 679.375)(730.5014, 20189.295)(731.5041, 4207.8267)(732.5138, 71597.16)(733.5165, 20305.166)(734.5184, 4805.74)(776.0342, 7497.7964)(776.53436, 2784.557)	11.9354
1-18:3-2-16:3-monogalactosyldiacylglycerol	149826	1	151163	1	1	1	196804	202631	196280	2815907	2771149	2836456	328407	334786	330120	1-18:3-2-16:3-monogalactosyldiacylglycerol	1-18:3-2-16:3-monogalactosyldiacylglycerol [ C43 H70 O10, tgt= ]	(774.5213, 2740.9434)(730.4971, 11518.597)(731.4998, 1420.6832)(748.5122, 9234.09)(747.0259, 22125.867)(747.5332, 6351.733)	13.6595
1-18:3-2-16:4-monogalactosyldiacylglycerol	227629	245258	236050	1	1	1	547630	544732	551837	1	1	1	511819	549157	1158724	1-18:3-2-16:4-monogalactosyldiacylglycerol	1-18:3-2-16:4-monogalactosyldiacylglycerol [ C43 H68 O10, tgt= ]	(746.4945, 1002.45496)(762.5252, 16694.193)(763.528, 3529.0437)(744.5172, 25316.97)(745.5198, 6062.06)	12.7163
1-18:3-2-18:1-phosphatidylcholine	489203	488620	303040	344269	1225878	1192778	1423278	1399244	403398	372424	390201	398046	294342	286493	1	1-18:3-2-18:1-phosphatidylcholine	1-18:3-2-18:1-phosphatidylcholine [ C44 H80 N O8 P, tgt=63.86, overall=63.86 ]	(784.2391, 3412.1917)(786.5681, 1695.97)(764.2349, 3504.4583)(785.5866, 1234.25)(786.5697, 1676.23)(767.57056, 3290.644)(770.58093, 8004.849)(799.6005, 6146.066)(800.6014, 2071.2417)(783.59247, 4002.2773)(784.5966, 14147.47)(785.5987, 4452.9756)(809.9798, 406.21002)	21.6437
1-18:3-2-18:2-monogalactosyldiacylglycerol	657709	699332	1	3425714	2778596	2245131	2717506	2678001	2651868	1	2480735	2477463	808406	783225	819643	1-18:3-2-18:2-monogalactosyldiacylglycerol	1-18:3-2-18:2-monogalactosyldiacylglycerol [ C45 H76 O10, tgt=49.06, overall=49.06 ]	(776.5427, 15962.05)(777.5456, 3187.555)(758.5318, 31756.666)(759.5345, 8126.0103)(765.5602, 246.46002)(799.3477, 6897.84)(800.3494, 4482.025)(800.6012, 3156.56)(777.5879, 44267.387)(778.58954, 17656.8)(780.5664, 795.6415)(802.55585, 13268.083)(803.55853, 3201.1133)	18.7464
1-18:3-2-18:2-phosphatidylcholine	167102	187405	257373	2834309	1167493	1	518047	515503	523422	189568	807679	809056	472124	508346	483313	1-18:3-2-18:2-phosphatidylcholine	1-18:3-2-18:2-phosphatidylcholine [ C44 H78 N O8 P, tgt=38.71, overall=38.71 ]	(785.5858, 5283.97)(765.5591, 2675.9849)(784.36847, 73783.55)(783.541, 71244.69)(784.54346, 10779.83)(762.5242, 22196.475)(763.5269, 4955.6587)(799.2653, 2302.6199)(800.268, 3573.1797)(800.6072, 4247.85)(784.086, 4206.2285)(784.9253, 9832.267)(785.5942, 4243.82)(806.25824, 6537.466)(807.2611, 1244.0343)	18.7276
1-18:3-2-18:3-monogalactosyldiacylglycerol	155904	182691	1	1074602	96100	1	252834	232079	503769	144792	1494284	1436426	351291	629295	558278	1-18:3-2-18:3-monogalactosyldiacylglycerol	1-18:3-2-18:3-monogalactosyldiacylglycerol [ C45 H74 O10, tgt=34.21, overall=34.21 ]	(776.0349, 17216.38)(776.8711, 4842.9966)(758.5296, 8399.02)(779.22626, 2310.72)(758.5289, 15932.8125)(759.5313, 4097.15)(780.572, 504.63)(802.5526, 6257.09)(803.5579, 2848.61)(780.5196, 26342.525)(781.52246, 8030.6665)	16.9229
1-18:3-2-18:3-phosphatidylcholine	1	1	1	2249444	2188780	7428147	2633171	2583918	2555073	20664816	21704250	22180956	2594812	656674	1	1-18:3-2-18:3-phosphatidylcholine	1-18:3-2-18:3-phosphatidylcholine [ C44 H76 N O8 P, tgt=47.51, overall=47.51 ]	(759.5363, 11562.21)(782.53674, 112931.234)(783.5397, 43836.914)(784.5421, 5344.585)(765.5625, 151.66)(799.1637, 5799.8525)(800.4328, 4120.23)(800.6004, 3248.3)(780.27765, 1508.12)(779.5502, 1531.2)(804.51666, 12166.391)(805.5195, 2714.615)(788.5501, 394.45)	24.0229
11-dehydro-15-oxo spinosyn macrolactone	8949133	9210735	9090063	1	1	1702850	6369268	6588258	1620038	2298857	2193350	2148604	1779999	2131639	1835242	11-dehydro-15-oxo spinosyn macrolactone	11-dehydro-15-oxo spinosyn macrolactone [ C24H34O5, tgt= ]	(403.23486, 1159.13)(385.22806, 3902.3496)(388.25073, 990.50336)(403.2369, 2531.99)(386.2401, 18105.873)(387.44595, 1639.0879)(402.87018, 8225.813)(428.63803, 3276.4563)(429.24924, 13975.43)(430.25012, 3263.4102)(407.22052, 41982.773)(408.2215, 5216.752)(409.2327, 365.42)	3.1574
11-deoxoglycyrrhetinate	1	1	1	1	1	1	1	1	1	1	1	1	690296	653049	676649	11-deoxoglycyrrhetinate	11-deoxoglycyrrhetinate [ C30H48O3, tgt= ]	(462.33435, 29191.82)(463.33646, 804.31006)	14.1893
11-deoxycorticosterone	1	1	1	2687224	2660988	2715613	16831404	17310604	17402948	6954346	7133967	7073786	2641232	2673615	2716465	11-deoxycorticosterone	11-deoxycorticosterone [ C21 H30 O3, tgt=41.03, overall=41.03 ]	(330.22382, 99490.125)(331.2263, 9326.466)	5.0926
11-desoxycortisol	1182002	1193864	1215131	4489150	4465250	4408237	1	1281839	836343	918699	943734	951952	847970	830599	820296	11-desoxycortisol	11-desoxycortisol [ C21 H30 O4, tgt=50.39, overall=50.39 ]	(346.21744, 26066.117)(347.21872, 4436.6733)(328.20758, 5443.862)(330.44635, 75728.81)(331.22565, 9085.013)(367.25476, 15409.77)(346.2396, 55.42)(370.7794, 17733.588)(372.8503, 9636.016)(374.21045, 17813.502)	4.3448
11-icis/i-retinol	1	1	1	143126	1	1	1	1	1	1	1	1	1	1	1	11-icis/i-retinol	11-icis/i-retinol [ C20 H30 O, tgt=45.81, overall=45.81 ]	(309.2098, 8821.06)(292.2124, 319.25)	9.12
12,13&beta;-epoxy-16&beta;-hydroxy-&beta;-amyrin	1	1	1	1	1	1	1	1	1	1	1	1	1465962	1395187	1	12,13&beta;-epoxy-16&beta;-hydroxy-&beta;-amyrin	12,13&beta;-epoxy-16&beta;-hydroxy-&beta;-amyrin [ C30 H50 O3, tgt= ]	(482.38275, 22620.1)(483.386, 1410.6)(468.36963, 3805.37)	15.4043
12-demethyl-elloramycin	1	204428	205472	219637	1	1	294122	299472	296106	226080	219985	223539	343045	319142	323963	12-demethyl-elloramycin	12-demethyl-elloramycin [ C31 H34 O15, tgt=12.99, overall=12.99 ]	(669.1722, 11590.843)(670.17413, 1544.2816)	23.4862
13(S)-HPOTE	1	1	1	1	1	1	1	1	1	1	1	1	1	437734	427520	13(S)-HPOTE	13(S)-HPOTE [ C18H29O4, tgt= ]	(332.20404, 10161.09)(318.18945, 16848.39)	4.8952
13-[(iE/i)-2-methylcrotonoyl]oxylupanine	5268312	5373684	5255020	1298273	1274556	1294956	68698	15624716	15717499	434528	473085	455518	1048450	1679786	2673124	13-[(iE/i)-2-methylcrotonoyl]oxylupanine	13-[(iE/i)-2-methylcrotonoyl]oxylupanine [ C20 H31 N2 O3, tgt=45.06, overall=45.06 ]	(330.22418, 20404.393)(331.22723, 645.905)(330.22504, 108079.33)(331.22772, 12401.156)(348.25778, 38243.938)(349.26056, 2406.4375)(373.22858, 3465.0435)(353.21295, 52436.332)(354.2157, 4378.6)	5.32047
13-apo-&beta;-carotenone	3444231	3502150	3466487	1	1	1	1	1	1	1	1	1	1	1	1	13-apo-&beta;-carotenone	13-apo-&beta;-carotenone [ C18 H26 O, tgt=74.79, overall=74.79 ]	(265.18155, 1414539.6)(266.1846, 207324.92)(267.19006, 14747.113)	3.529
13-desoxypaxilline	1	517294	506674	310864	297533	304166	1	1	1	1630163	1688664	1688237	702753	721998	736544	13-desoxypaxilline	13-desoxypaxilline [ C27 H33 N O3, tgt=10.62, overall=10.62 ]	(419.24384, 700.83997)(403.23782, 17157.955)(440.16153, 10820.301)(442.16635, 11121.137)(442.7944, 12413.941)(443.29736, 4298.3237)(445.24637, 8039.6367)(446.24252, 2497.39)(427.23218, 27892.393)(426.21994, 4061.9333)	4.80379
13-hydroxylupanine	61574576	62402000	61647636	10612552	9859777	9771951	11178195	11647038	11618988	3176803	1	3142418	1	4643685	4628902	13-hydroxylupanine	13-hydroxylupanine [ C15 H25 N2 O2, tgt=35.89, overall=35.89 ]	(247.64314, 1125282.9)(250.19057, 815459.0)(251.1931, 55443.715)(252.1952, 332.37668)(288.52313, 49038.152)(289.19174, 7587.3)(273.4267, 5986.159)(274.1736, 6547.28)	2.81485
14,15-epoxyemindole-SB	244016	271772	255832	1	1	249706	1	1	1	631100	678500	634786	1	813119	1	14,15-epoxyemindole-SB	14,15-epoxyemindole-SB [ C28 H39 N O2, tgt=0.13, overall=0.13 ]	(421.311, 17753.69)(422.3139, 469.6)(445.2774, 4208.34)(427.27225, 12382.141)(428.94955, 20850.248)(429.62222, 85927.68)(430.2906, 17762.5)	6.11936
14-demethyllanosterol	1	1	1	1	1	1	1	1	1	961114	989793	986016	1	1	1	14-demethyllanosterol	14-demethyllanosterol [ C29 H46 O, tgt= ]	(438.36063, 43994.016)(439.36343, 5620.404)	15.1234
15,15'-dihydroxy-&beta;-carotene	1059244	1124909	1143211	994854	944264	920303	1	134056	136789	941358	907570	900400	211581	206670	197012	15,15'-dihydroxy-&beta;-carotene	15,15'-dihydroxy-&beta;-carotene [ C40 H58 O2, tgt=11.75, overall=11.75 ]	(574.6236, 5322.154)(575.455, 889.778)(559.44806, 14301.566)(588.4679, 38815.0)(589.4703, 6120.5957)(575.47595, 9882.854)(576.4805, 2262.9067)(580.45374, 2179.8582)(581.4573, 2151.2825)	21.9632
15,16-dihydrobiliverdin	1	1	1	622286	644783	621595	1	1	1	1	1	1	1	1	1	15,16-dihydrobiliverdin	15,16-dihydrobiliverdin [ C33 H34 N4 O6, tgt=40.42, overall=40.42 ]	(569.2635, 2094.82)(601.2891, 12040.097)(602.29193, 643.72)	3.571
15-demethoxy-aclacinomycin A	1	1	1	1	1	1	1	1	1	325274	336245	333280	1	1	1	15-demethoxy-aclacinomycin A	15-demethoxy-aclacinomycin A [ C41 H51 N O15, tgt= ]	(821.31, 17522.883)(822.3128, 4368.2563)	7.799
15-demethoxyaclacinomycin T	1	208907	168821	1209597	1086279	1	104659	109260	1	225172	225479	234052	1246325	1254101	1271277	15-demethoxyaclacinomycin T	15-demethoxyaclacinomycin T [ C29 H33 N O10, tgt=27.55, overall=27.55 ]	(539.2035, 6028.3)(559.208, 200904.58)(560.2105, 51402.855)(561.2124, 4523.22)(575.747, 25334.041)(576.7497, 4811.17)(562.24963, 22488.025)(556.7439, 28127.23)(558.2513, 12989.955)	9.50608
15-hydroxysolavetivone	985997	1073056	1016415	1	1	1	1	1	1	1	1	1	1	1	1	15-hydroxysolavetivone	15-hydroxysolavetivone [ C15 H22 O2, tgt=43.90, overall=43.90 ]	(235.17146, 31751.229)(236.17229, 1441.5967)(240.14326, 43475.87)	3.596
15-icis/i-phytoene	12511038	12533977	12072997	4132987	4044662	4188363	8268320	8246645	8086557	1850002	1790356	1849609	7825547	7727897	8246259	15-icis/i-phytoene	15-icis/i-phytoene [ C40 H64, tgt=35.47, overall=35.47 ]	(551.5267, 3961.3499)(563.5268, 191900.22)(564.5296, 61536.715)(565.5319, 6531.754)	16.631
16&alpha;, 17-epoxy gibberellin Asub12/sub	1059736	1122755	1048568	2191343	2085539	2174797	1000407	544057	788004	89522	4895232	4053483	505596	486380	414245	16&alpha;, 17-epoxy gibberellin Asub12/sub	16&alpha;, 17-epoxy gibberellin Asub12/sub [ C20 H26 O5, tgt=47.55, overall=47.55 ]	(350.19095, 4065.7556)(350.19217, 32968.375)(351.1964, 7522.4897)(364.20645, 25037.764)(365.2112, 4743.956)(348.71317, 27215.502)(348.2049, 402.84)(372.17325, 3572.7766)	4.8584
16&alpha;, 17-epoxy gibberellin Asub9/sub	1	1	1	3738038	3730627	3718065	6099014	6135181	5996166	2659010	2761748	2737157	3554838	3608398	3515516	16&alpha;, 17-epoxy gibberellin Asub9/sub	16&alpha;, 17-epoxy gibberellin Asub9/sub [ C19 H23 O5, tgt=55.03, overall=55.03 ]	(335.3378, 13285.5205)(313.14084, 91312.164)(314.1437, 9205.126)(336.17667, 100125.305)(337.1791, 11992.433)(350.19083, 13779.013)(351.1902, 125.925)(359.1527, 126.74)	5.4812
16&alpha;,17-epoxy gibberellin Asub4/sub	1422595	1499267	1398321	1	1	1	1	1	1	1	1	1	1	1	1	16&alpha;,17-epoxy gibberellin Asub4/sub	16&alpha;,17-epoxy gibberellin Asub4/sub [ C19H23O6, tgt= ]	(352.17258, 446.77)(329.13675, 21073.428)(330.1405, 961.2834)(331.15524, 130.025)(366.19565, 7031.9336)	2.7536
16, 17-dihydro-16&alpha;, 17-dihydroxy gibberellin Asub9/sub	1	212297	204912	366365	346503	296007	1324358	1374195	290422	1	1	1	178753	183947	185784	16, 17-dihydro-16&alpha;, 17-dihydroxy gibberellin Asub9/sub	16, 17-dihydro-16&alpha;, 17-dihydroxy gibberellin Asub9/sub [ C19 H25 O6, tgt=53.83, overall=53.83 ]	(375.1736, 5558.4)(336.17548, 57887.34)(337.17813, 10712.677)(351.59866, 5057.7217)(352.1721, 7599.33)(371.21017, 11690.192)(352.175, 4277.9897)(350.19003, 12128.668)	4.8074
16,17-dihydro-16&alpha;,17-dihydroxy gibberellin Asub12/sub	1107587	1192886	1103002	1097495	1132952	219875	1859360	1930391	1911149	238191	252474	236483	411372	422217	414245	16,17-dihydro-16&alpha;,17-dihydroxy gibberellin Asub12/sub	16,17-dihydro-16&alpha;,17-dihydroxy gibberellin Asub12/sub [ C20 H28 O6, tgt=50.02, overall=50.02 ]	(366.1881, 10276.334)(347.51868, 6380.197)(347.1759, 1308.52)(350.19165, 31754.17)(351.1964, 7586.393)(382.22623, 11028.117)(383.22864, 1646.2733)(364.208, 19061.826)(365.21243, 1391.8734)(389.17783, 694.584)(391.1789, 5555.1523)(392.19778, 5659.236)	3.94467
16,17-dihydro-16&alpha;,17-dihydroxy gibberellin Asub4/sub	241997	314024	298397	1517500	1193756	1145061	3081641	140463	231273	1	1	1	1	1	1	16,17-dihydro-16&alpha;,17-dihydroxy gibberellin Asub4/sub	16,17-dihydro-16&alpha;,17-dihydroxy gibberellin Asub4/sub [ C19 H25 O7, tgt=42.40, overall=42.40 ]	(350.15817, 1233.75)(352.16907, 800.17334)(371.1783, 186.87666)(350.1575, 1519.0599)(351.16266, 133.045)(365.8491, 47861.645)(366.85648, 4824.8994)	4.051
16-alpha-hydroxygypsogenate	108395	114472	107128	1	1	1	1	1	1	389733	397490	1	1	1	1	16-alpha-hydroxygypsogenate	16-alpha-hydroxygypsogenate [ C30 H44 O6, tgt= ]	(505.2785, 16489.045)(506.2793, 2918.2852)(502.33823, 7074.66)	6.19062
16-alpha-hydroxygypsogenate-28-beta-D-glucoside	1	1	1	6901421	6896744	6784178	1037421	1036078	1001721	245957	270367	268357	94881	95515	1	16-alpha-hydroxygypsogenate-28-beta-D-glucoside	16-alpha-hydroxygypsogenate-28-beta-D-glucoside [ C36 H55 O11, tgt=40.09, overall=40.09 ]	(645.3764, 236959.05)(646.3789, 73343.164)(647.3803, 7610.6167)(682.41895, 33920.9)(683.41614, 10502.288)(666.38654, 1159.0166)(668.4129, 3947.78)	10.4323
16-feruloyloxypalmitate	731001	697229	1079422	403671	377236	394356	981188	1037778	1015263	1160499	894440	1	595964	609972	610654	16-feruloyloxypalmitate	16-feruloyloxypalmitate [ C26 H39 O6, tgt=47.11, overall=47.11 ]	(447.27386, 28381.195)(448.27597, 2484.5447)(431.2646, 3818.57)(470.3142, 983.0633)(471.33505, 878.79)(472.13284, 7800.796)(456.2575, 5932.1724)(458.2829, 1523.995)	6.8544
16-hydroxypalmitate	1	1	1	1278366	1290957	1262797	2399847	2419697	2379830	362378	357459	332522	1	299037	1	16-hydroxypalmitate	16-hydroxypalmitate [ C16 H31 O3, tgt=37.01, overall=37.01 ]	(277.20413, 11913.426)(279.01703, 17538.176)(279.55383, 62896.66)(280.22308, 8866.715)	13.762
16-hydroxytabersonine	1655984	1076751	1715443	467289	442086	445990	2018708	1972431	693558	4265974	4442747	4339542	933377	962742	952781	16-hydroxytabersonine	16-hydroxytabersonine [ C21 H25 N2 O3, tgt=46.22, overall=46.22 ]	(356.20337, 2631.406)(357.1951, 202.61)(357.57758, 26658.613)(359.21384, 4201.588)(336.17734, 34364.68)(337.18002, 6128.487)(373.22806, 4802.302)(374.2186, 2388.88)(353.21356, 25398.475)(354.21625, 1026.21)(379.18387, 886.346)(360.4281, 27872.822)(361.17874, 4558.5034)	5.1944
16-methoxytabersonine	3504033	3586361	1	1	1	1	854007	2117908	2163114	281147	284588	292724	320283	323229	246201	16-methoxytabersonine	16-methoxytabersonine [ C22 H27 N2 O3, tgt=44.62, overall=44.62 ]	(350.19086, 14690.778)(351.18744, 371.22)(373.22736, 1483.982)(350.19272, 53336.207)(351.1962, 6882.74)(392.64862, 13552.356)(394.20874, 3506.3132)(375.1858, 187.38)	5.15525
16-sinapoyloxypalmitate	964256	950853	953191	4418091	1327650	1389688	2991113	4186791	4241568	11375794	11089861	11421713	666609	515613	661704	16-sinapoyloxypalmitate	16-sinapoyloxypalmitate [ C27 H41 O7, tgt=22.61, overall=22.61 ]	(477.28564, 53896.86)(478.28714, 8885.034)(496.6934, 141251.58)(497.3215, 30349.23)(498.3242, 4541.9233)(500.2819, 387.2)(483.26202, 1173.715)(487.28772, 659.735)	11.877
17-&alpha;-hydroxyprogesterone	5641265	5773209	5634841	2687224	2660988	2715613	16831404	17310604	17402948	6954346	7133967	7073786	2641232	2673615	2716465	17-&alpha;-hydroxyprogesterone	17-&alpha;-hydroxyprogesterone [ C21 H30 O3, tgt=41.03, overall=41.03 ]	(330.22427, 95086.75)(331.22675, 8701.758)	3.805
17&beta;-estradiol	4791494	5003424	4842924	1	1	1	1	1	1	3332767	197101	4471880	8417966	8490219	8278939	17&beta;-estradiol	17&beta;-estradiol [ C18 H24 O2, tgt= ]	(274.17603, 544.7734)(260.1863, 10971.568)(300.17953, 1546.8899)(278.71423, 44999.605)(280.16214, 6115.596)(281.1631, 181.81)	2.952
17-iO/i-acetylnorajmaline	1024945	1076751	1030309	1505671	1477581	1477081	729052	748183	694128	4629542	4761589	4613320	933377	962742	952781	17-iO/i-acetylnorajmaline	17-iO/i-acetylnorajmaline [ C21 H26 N2 O3, tgt=57.08, overall=57.08 ]	(356.20224, 3091.0422)(358.20374, 2449.3867)(359.21152, 3936.8867)(336.17725, 29009.555)(337.18002, 6572.0767)(342.1954, 768.03)(373.2277, 1670.6857)(379.5975, 35300.895)(381.20422, 9337.8)(360.68033, 25037.928)(361.1813, 10378.99)(363.19324, 1663.6967)	6.8188
17-O-acetylajmaline	4069720	424112	352141	1472048	1384233	1397570	5243168	5454922	5370077	2039669	1992198	3404199	399035	407040	392523	17-O-acetylajmaline	17-O-acetylajmaline [ C22 H29 N2 O3, tgt=47.38, overall=47.38 ]	(373.23184, 5648.745)(351.19644, 9036.359)(373.2263, 28623.287)(357.2344, 3379.85)(387.25266, 23819.184)(388.25635, 3268.61)(373.2623, 10913.014)(393.3892, 9428.059)(393.96146, 8056.4077)(395.21652, 527.0334)(374.44427, 4057.36)	3.26107
17-O-deacetylvindoline	1	431877	441843	1	753004	758515	2069578	2134220	2108540	281831	263557	277266	1	1	1	17-O-deacetylvindoline	17-O-deacetylvindoline [ C23 H31 N2 O5, tgt=0.86, overall=0.86 ]	(415.66043, 9157.404)(416.8273, 6148.604)(401.22226, 6119.967)(399.21652, 60503.734)(400.2185, 5099.4966)(434.0008, 8713.61)(436.25305, 3004.9866)(415.2353, 18535.94)(416.2397, 4480.24)(442.21075, 1366.55)(420.21094, 26231.44)(421.2142, 183.99)	4.56192
17-oxosparteine	525136064	1	1	1	1	1	1	1	1	1	1	1	1	1	1	17-oxosparteine	17-oxosparteine [ C15 H25 N2 O, tgt=47.54, overall=47.54 ]	(233.192, 4262.54)	3.963
18'-hydroxy-&chi;,&chi;-caroten-18-oate	45779076	45628088	45031808	301771	291621	317225	5962658	5906727	5759491	281730	309741	307919	6678516	6675331	6668738	18'-hydroxy-&chi;,&chi;-caroten-18-oate	18'-hydroxy-&chi;,&chi;-caroten-18-oate [ C40 H45 O3, tgt=28.82, overall=28.82 ]	(574.3352, 6050.11)(575.33765, 937.92993)(555.3257, 54881.01)(556.3255, 10906.059)(557.3259, 1204.0433)(574.3324, 9506.48)(575.3349, 1200.6799)(556.3472, 592834.25)(557.3501, 169465.08)(558.352, 23101.174)(559.35614, 2022.0566)(576.3656, 233.83)(599.34644, 177244.56)(600.34863, 43081.523)(601.3497, 4226.1567)(578.3263, 9645.043)(579.33136, 1035.3365)	6.0758
18-hydroxyoleate	1	1	3711600	15676750	15432733	15592384	1	1	1	1	1	1	1	1	1	18-hydroxyoleate	18-hydroxyoleate [ C18 H33 O3, tgt=8.13, overall=8.13 ]	(297.24765, 2407.41)(298.2643, 39414.52)(299.2671, 3703.31)(320.2408, 4844.8765)	13.553
18-hydroxyrenierapurpurin	1340246	119085	109381	1	1	1	1	1	3959647	423842	262122	1	434263	409419	429656	18-hydroxyrenierapurpurin	18-hydroxyrenierapurpurin [ C40 H48 O, tgt=12.01, overall=12.01 ]	(547.09576, 26001.828)(549.1435, 4553.2676)(527.1966, 13240.11)(527.9663, 2807.116)(544.3806, 44472.08)(545.3835, 12909.43)(551.85223, 2396.2925)	11.0624
18-oxo-oleate	1	15862836	1	4459806	1	5690611	5155897	5295111	5159823	1	1	1	5802391	5738919	1	18-oxo-oleate	18-oxo-oleate [ C18 H31 O3, tgt=59.33, overall=59.33 ]	(318.72733, 4178.655)(319.2288, 56.62)(279.2197, 32414.385)(280.22275, 9214.97)(295.23303, 6262.265)(296.2439, 437.55)(316.27075, 1044.965)(296.5339, 46534.555)(297.53662, 4630.1313)(298.26138, 2473.24)(299.2657, 287.34)	14.0406
19-iO/i-&beta;-glucopyranosyl-steviol	1828391	1853759	1829783	221532	227035	217694	1	1	1	1	1	1	207285	360204	339552	19-iO/i-&beta;-glucopyranosyl-steviol	19-iO/i-&beta;-glucopyranosyl-steviol [ C26 H40 O8, tgt=48.64, overall=48.64 ]	(484.7864, 2620.07)(487.2905, 1065.29)(498.30777, 9749.544)(504.71033, 21079.867)(506.2627, 7040.8716)(507.26968, 2487.3865)	5.8104
1-butenesulfenate	821819	908765	882643	1001397	984729	1013290	1056211	1110455	1129194	984871	941824	932813	954479	983916	938690	1-butenesulfenate	1-butenesulfenate [ C4 H8 O S, tgt=46.88, overall=46.88 ]	(127.01884, 57175.316)(111.00556, 64837.05)	2.0036
1-deoxy-11-oxopentalenate	520141	338390	173472	1	1	1	1	1	1	1	1	1	1	1	1	1-deoxy-11-oxopentalenate	1-deoxy-11-oxopentalenate [ C15 H19 O3, tgt=48.68, overall=48.68 ]	(247.13611, 2596.63)(249.15002, 5491.31)(233.14128, 143286.55)(234.14374, 7700.7134)(270.18234, 33951.844)(253.11188, 17807.096)(255.12634, 1325.315)	2.563
1-iO/i-caffeoyl-&beta;-iD/i-glucose	786725	834521	796577	1	1	1	1	1	1	1	1	1	1	1	1	1-iO/i-caffeoyl-&beta;-iD/i-glucose	1-iO/i-caffeoyl-&beta;-iD/i-glucose [ C15 H18 O9, tgt= ]	(365.09195, 38056.75)(366.09497, 1313.71)	2.18325
1-kestotriose	1	1	1	1	1	1	1	1	1	215200	223534	218856	1	1	1	1-kestotriose	1-kestotriose [ C18 H32 O16, tgt= ]	(522.1939, 13239.421)(523.19684, 1247.8467)	8.316
1-methylpyrrolidine-2-acetyl-CoA	234436	249774	1053904	1360273	1302677	1317325	1631152	1593826	260015	1473048	1488586	280505	302340	1933521	307356	1-methylpyrrolidine-2-acetyl-CoA	1-methylpyrrolidine-2-acetyl-CoA [ C28 H44 N8 O17 P3 S, tgt=31.72, overall=31.72 ]	(894.1686, 7151.9873)(895.1691, 682.76337)(872.1633, 3662.66)(872.15454, 6341.095)(908.4374, 26934.635)(909.1893, 4508.1504)(916.17786, 499.2525)	23.0578
1-monopalmitoylethylene glycol	1	1	1	142193760	142588144	142636528	197175424	198321216	195998384	69245504	67154488	1	1	1	1	1-monopalmitoylethylene glycol	1-monopalmitoylethylene glycol [ C18 H36 O3, tgt=17.52, overall=17.52 ]	(283.27045, 423905.2)(284.2729, 26497.46)	16.512
1-naphthol glucoside	1	1	1	160497	161964	158772	1	1	1	475413	468194	482957	238305	239248	252508	1-naphthol glucoside	1-naphthol glucoside [ C16 H18 O6, tgt=15.41, overall=15.41 ]	(292.11584, 4453.9155)(306.131, 9217.547)	3.4972
1-octadecanoyl-sn-glycerol 3-phosphate	1	1	1	882894	859428	883199	3033679	3073025	2932870	968945	1040297	127900	338087	329414	330604	1-octadecanoyl-sn-glycerol 3-phosphate	1-octadecanoyl-sn-glycerol 3-phosphate [ C21 H41 O7 P, tgt=9.90, overall=9.90 ]	(436.2542, 27457.045)(437.25497, 2444.9033)(459.29602, 9790.286)(439.4852, 1773.5219)(441.28427, 12912.527)(459.75168, 9967.96)(460.25302, 880.97003)(444.5754, 5547.769)(446.24353, 2359.785)	4.1958
1-oleoyl-2-lyso-glycerone phosphate	365951	396608	371856	285928	299417	301298	1653704	1709787	1698141	771377	796566	83353	388173	399819	388118	1-oleoyl-2-lyso-glycerone phosphate	1-oleoyl-2-lyso-glycerone phosphate [ C21 H37 O7 P, tgt=14.23, overall=14.23 ]	(433.22403, 9000.513)(434.7325, 4005.0037)(435.2412, 3178.0833)(416.21945, 6626.472)(418.21774, 277.86334)(417.53555, 13533.443)(416.23853, 3772.64)(450.26065, 15521.141)(433.3745, 17900.797)(436.25314, 4413.457)(437.2547, 82.41)(457.2336, 1330.7799)(442.21307, 6991.91)	5.79073
1-oleyl-2-lyso-phosphatidate	1	1	1	1	1	1	16852162	17251262	16811122	3170297	3039954	3039791	3136585	3073386	2990184	1-oleyl-2-lyso-phosphatidate	1-oleyl-2-lyso-phosphatidate [ C21H39O7P, tgt= ]	(435.25092, 196444.52)(436.2533, 34505.996)(437.25497, 2027.7267)(419.569, 893.56665)(435.25214, 36813.234)(436.2544, 3923.548)(417.24982, 279.27145)(459.84326, 2650.4722)(458.2511, 59.84)	4.2452
1-palmitoleylglycerol 3-phosphate	1	1	1	1	1	1	1	1	1	1	5805254	5514532	1	1	1	1-palmitoleylglycerol 3-phosphate	1-palmitoleylglycerol 3-phosphate [ C19H37O7P, tgt= ]	(408.2315, 70374.84)(409.2335, 8738.745)(395.2185, 296.05)(427.27203, 11038.48)(428.27448, 125.795)(431.2648, 2871.775)(413.2566, 4767.995)(433.2207, 27553.59)(434.228, 2269.7349)(416.21222, 4598.9746)(417.21225, 2336.73)	4.3336
1-palmitoyl-2-linoleoyl-phosphatidylcholine	560456	585838	394035	826813	511521	498740	735203	681973	664433	307274	885036	910836	361474	866397	336484	1-palmitoyl-2-linoleoyl-phosphatidylcholine	1-palmitoyl-2-linoleoyl-phosphatidylcholine [ C42 H80 N O8 P, tgt=70.67, overall=70.67 ]	(763.57446, 6083.6855)(740.55804, 2188.4106)(741.5621, 12962.624)(742.5632, 3509.7998)(763.5731, 8622.502)(764.5747, 2435.1323)(777.5899, 28132.496)(778.5888, 12892.974)(757.56793, 635.63)(782.8838, 2790.189)(786.57605, 3572.1802)	22.0174
1-palmitoyl-2-vernoloyl-phosphatidylcholine	3798138	3953701	3974551	4044623	3930199	3824663	4517187	4424265	4352299	182434	178050	296830	440141	4428826	4372205	1-palmitoyl-2-vernoloyl-phosphatidylcholine	1-palmitoyl-2-vernoloyl-phosphatidylcholine [ C42 H80 N O9 P, tgt=26.87, overall=26.87 ]	(777.58514, 8459.446)(778.58734, 2541.3135)(756.56604, 1472.79)(760.27356, 45466.152)(757.5706, 1053.47)(791.86884, 49400.195)(792.8708, 20419.021)(777.5905, 16375.823)(778.5923, 6450.0884)	22.843
1-palmitoylglycerol 3-phosphate	939397	993141	972255	839399	785666	773764	2345116	2405446	2321782	1	5805254	5514532	660377	670555	667473	1-palmitoylglycerol 3-phosphate	1-palmitoylglycerol 3-phosphate [ C19 H37 O7 P, tgt=58.79, overall=58.79 ]	(408.2282, 25012.22)(409.2321, 4401.77)(395.2185, 296.05)(413.25513, 17722.725)(414.25735, 1377.0349)(391.23367, 25700.1)(427.27203, 11038.48)(428.27448, 125.795)(431.2648, 2871.775)(413.25632, 5389.5923)(433.22162, 12096.035)(434.22736, 1164.5399)(417.2196, 12627.681)(417.21225, 2336.73)	4.8442
1-palmitoylglycerone 3-phosphate	8327916	8548554	1	356061	338779	348487	1	1	1	1	1	1	1	1	1	1-palmitoylglycerone 3-phosphate	1-palmitoylglycerone 3-phosphate [ C19 H35 O7 P, tgt=49.51, overall=49.51 ]	(407.20908, 10266.304)(389.2129, 10405.41)(392.2054, 4930.2)(393.2076, 43322.688)(407.2226, 112904.87)(408.22467, 14333.301)(429.25, 23945.41)(407.2411, 3092.9934)(433.202, 2482.395)	4.6612
1-phenyl-7-(3,4-dihydroxyphenyl)-hepta-1,3-dien-5-one	260052	295698	279952	3796993	3734410	206161	5411118	5346299	5310450	8647893	8954458	8897062	365828	371904	339720	1-phenyl-7-(3,4-dihydroxyphenyl)-hepta-1,3-dien-5-one	1-phenyl-7-(3,4-dihydroxyphenyl)-hepta-1,3-dien-5-one [ C19 H18 O3, tgt=64.48, overall=64.48 ]	(294.79837, 164267.61)(296.134, 32571.709)(297.13733, 739.6767)(279.12616, 14302.646)(280.1197, 3135.846)(281.1375, 4592.69)(279.1253, 14879.7295)(281.1375, 24339.28)(282.13574, 1076.045)(316.1742, 7147.6953)(317.1688, 7886.47)(295.15356, 56162.617)(296.15625, 4058.237)	5.3348
1-phenylpropane-1,2-dione	207436	219855	226607	1	1	1	1	1	1	1	1	1	202101	1	1	1-phenylpropane-1,2-dione	1-phenylpropane-1,2-dione [ C9 H8 O2, tgt= ]	(130.04462, 334.02335)(169.0912, 1674.72)(153.02771, 10322.553)	2.023
1-pyrroline-4-hydroxy-2-carboxylate	2623748	2652183	2667486	2890741	2741887	2594255	2755941	2748515	2858685	2499763	2693777	2665433	2493810	2492386	2669879	1-pyrroline-4-hydroxy-2-carboxylate	1-pyrroline-4-hydroxy-2-carboxylate [ C5 H6 N O3, tgt=32.11, overall=32.11 ]	(130.0444, 264.99)(151.897, 33811.35)(152.89398, 12055.498)(153.02554, 13474.2)(138.02226, 8233.37)	2.013
2&alpha;, 7&beta;-dihydroxytaxusin	168626	673806	614312	884786	884188	846147	230132	245496	228411	3476239	3405007	281334	361478	350732	309589	2&alpha;, 7&beta;-dihydroxytaxusin	2&alpha;, 7&beta;-dihydroxytaxusin [ C28 H40 O10, tgt=47.00, overall=47.00 ]	(538.76086, 379.025)(518.244, 9394.411)(519.2428, 948.135)(542.02966, 5274.926)(540.266, 2876.7598)(555.9355, 5370.2334)(538.3051, 41854.574)(539.30524, 8373.46)(562.2668, 30047.637)(563.2665, 33721.99)(564.269, 3859.29)(545.0128, 451.41998)(546.26855, 1895.77)	5.1848
2&beta;,3&beta;-dihydroxy-12,15-cassadiene-11-one	1	1	1	1	1	1	1003722	1079363	1112371	1	1	1	1	1	1	2&beta;,3&beta;-dihydroxy-12,15-cassadiene-11-one	2&beta;,3&beta;-dihydroxy-12,15-cassadiene-11-one [ C20H30O3, tgt= ]	(318.2261, 23392.643)(319.2291, 321.3)(320.24155, 3699.0535)	14.0547
2-&omega;-hydroxy-C22:0-LPA	1	1	1	820208	822074	1062344	834921	805444	745357	9569797	10056461	9969848	800359	537864	839419	2-&omega;-hydroxy-C22:0-LPA	2-&omega;-hydroxy-C22:0-LPA [ C25 H49 O8 P, tgt=57.11, overall=57.11 ]	(513.32697, 3393.6416)(491.30176, 23641.38)(492.30463, 2592.435)(512.3184, 16261.804)(513.321, 1904.4901)(532.73193, 6722.997)(533.303, 2352.32)(514.2996, 166817.64)(515.3037, 68332.195)(516.30255, 6600.8066)	6.04846
2-(2-methylpyridin-3-yl)ethanol	8691283	11775848	7515011	4264632	5317612	5442971	1	1	1	5061446	5025180	4893695	1	1	1	2-(2-methylpyridin-3-yl)ethanol	2-(2-methylpyridin-3-yl)ethanol [ C8 H11 N O, tgt=63.57, overall=63.57 ]	(120.07555, 86009.38)(121.07844, 1501.5768)(144.0731, 3396.48)	3.8818
2-(4-amino-4-carboxybutyl)aziridine-2-carboxylate	1300222	1425285	1390608	3304737	3838358	3900171	961612	1010032	1016309	1	1	1	1	1	1	2-(4-amino-4-carboxybutyl)aziridine-2-carboxylate	2-(4-amino-4-carboxybutyl)aziridine-2-carboxylate [ C8 H13 N2 O4, tgt=55.99, overall=55.99 ]	(203.09435, 805.5617)(219.12428, 29666.295)(220.12636, 1161.1901)	2.51733
2-(4'-methylthio)butylmalate	1	1	1	1	1	1	1	1	1	1	1	1	1194083	1178191	1185628	2-(4'-methylthio)butylmalate	2-(4'-methylthio)butylmalate [ C9 H14 O5 S, tgt= ]	(252.08484, 40565.582)(253.08636, 949.98)	5.5282
2-(6'-methylthio)hexylmalate	1	1	1	277045	272220	274830	397892	409697	398254	1	1	1	1	1	1	2-(6'-methylthio)hexylmalate	2-(6'-methylthio)hexylmalate [ C11 H18 O5 S, tgt=26.28, overall=26.28 ]	(269.09915, 2753.9866)(280.11624, 9989.019)(267.12143, 108964.94)	4.15225
2-(7'-methylthio)heptylmalate	1119798	1203350	1166222	1	381634	1	2015681	2087105	1	1	1	1	1	1	1	2-(7'-methylthio)heptylmalate	2-(7'-methylthio)heptylmalate [ C12 H20 O5 S, tgt=42.56, overall=42.56 ]	(277.1051, 22633.354)(278.10794, 227.44)(280.11932, 6923.05)(294.1356, 6385.313)(278.37494, 11885.682)(281.4614, 2452.9434)(281.1383, 7871.67)(282.1329, 281.08)	3.657
2,2,6,9-tetramethyl-3,6-dihydro-2H-1-benzoxocine-3,8-diol	8392858	8647739	8580862	1	1	206850	1551536	1602239	1601136	1583305	1568532	1541330	750647	750873	713470	2,2,6,9-tetramethyl-3,6-dihydro-2H-1-benzoxocine-3,8-diol	2,2,6,9-tetramethyl-3,6-dihydro-2H-1-benzoxocine-3,8-diol [ C15 H20 O3, tgt= ]	(233.13684, 46982.79)(249.14986, 469.16)(233.64392, 36444.26)(234.14305, 2052.555)(270.1809, 20089.158)(271.18298, 642.91003)(251.16594, 2546.72)(255.87775, 7583.873)(258.13388, 1273.6832)	2.7252
2',3,4,4',6'-pentahydroxychalcone	1	1	1	1	1	1	1	1	1	4107353	4194490	4286045	1	1	1	2',3,4,4',6'-pentahydroxychalcone	2',3,4,4',6'-pentahydroxychalcone [ C15 H12 O6, tgt= ]	(271.04932, 125649.4)(272.05197, 9997.133)	9.4118
2',3',4'-iO/i-methyl-rhamnosyl tetracyclic spinosyn pseudoaglycone	497175	494669	487747	645375	641129	677916	277119	285318	273150	5610470	6061618	4315817	1	1	1	2',3',4'-iO/i-methyl-rhamnosyl tetracyclic spinosyn pseudoaglycone	2',3',4'-iO/i-methyl-rhamnosyl tetracyclic spinosyn pseudoaglycone [ C33 H50 O9, tgt=36.15, overall=36.15 ]	(592.35187, 35617.78)(594.0205, 10551.602)(596.01874, 4171.8135)(596.3526, 372.99)(574.33673, 23369.545)(575.3392, 3976.4033)(574.3322, 14010.817)(575.33466, 1507.0468)(576.3656, 283.06)(598.3388, 84823.26)(600.34863, 40781.75)(601.3497, 4013.9167)	6.41825
2,3-bis[(3iR/i)-3-hydroxymyristoyl]-&alpha;-D-glucosaminyl 1-phosphate	1	1	1	815966	812350	811384	1	1	1	2200305	2237455	2223681	1	1	1	2,3-bis[(3iR/i)-3-hydroxymyristoyl]-&alpha;-D-glucosaminyl 1-phosphate	2,3-bis[(3iR/i)-3-hydroxymyristoyl]-&alpha;-D-glucosaminyl 1-phosphate [ C34 H64 N O12 P, tgt=20.39, overall=20.39 ]	(693.39844, 87586.56)(694.4007, 23674.4)(695.40186, 1491.7833)(732.3919, 34616.68)(733.39404, 9446.587)	6.2534
2,3-bis-iO/i-(geranylgeranyl)glycerol 1-phosphate	2409005	2475518	1	607879	634081	626276	2848246	2816137	1	639212	2595807	2602554	2597880	2579538	2531433	2,3-bis-iO/i-(geranylgeranyl)glycerol 1-phosphate	2,3-bis-iO/i-(geranylgeranyl)glycerol 1-phosphate [ C43 H71 O6 P, tgt=25.98, overall=25.98 ]	(715.4956, 12879.883)(716.4982, 1773.32)(736.3457, 4280.6064)(735.5557, 1610.09)(719.1471, 1554.855)(719.551, 25004.94)(720.55, 10652.38)(742.5049, 1696.3)	18.0201
2,3-dihydroxybenzoate	12682387	9627767	1	16980954	7099436	10672721	9311550	7993176	5072610	7991604	4221399	1	6434687	6269427	7026084	2,3-dihydroxybenzoate	2,3-dihydroxybenzoate [ C7 H5 O4, tgt=47.54, overall=47.54 ]	(138.02159, 604.6715)(157.99664, 79276.805)	0.359538
2,3-dimethyl-6-geranylgeranyl-1,4-benzoquinol	1	1	1	1	1	1	1	1	1	1	1	1	337609	1	325460	2,3-dimethyl-6-geranylgeranyl-1,4-benzoquinol	2,3-dimethyl-6-geranylgeranyl-1,4-benzoquinol [ C28 H42 O2, tgt= ]	(433.31433, 14991.346)(416.2883, 1774.9651)	13.166
2,3-dimethyl-6-phytyl-1,4-benzoquinol	1	1	1	1	1	1	1	1	1	344456	355581	376596	1	1	1	2,3-dimethyl-6-phytyl-1,4-benzoquinol	2,3-dimethyl-6-phytyl-1,4-benzoquinol [ C28 H48 O2, tgt= ]	(439.36343, 7760.3867)(421.33408, 4876.0703)	15.22
2,3-dioctanoylglyceramide	2674495	2817437	2427215	12598220	12408351	12252089	1692105	1672757	1654466	2122533	2100649	2158005	1	1	1186868	2,3-dioctanoylglyceramide	2,3-dioctanoylglyceramide [ C19 H35 N O5, tgt=78.23, overall=78.23 ]	(358.25415, 127397.54)(359.25644, 17073.242)(360.25705, 271.10333)(358.2561, 59190.16)(359.259, 9340.96)(384.2629, 2304.76)	5.62008
2',3'-iO/i-methyl-rhamnosyl tetracyclic spinosyn pseudoaglycone	407508	407083	404074	931662	938049	936738	258546	268583	239063	2227251	2332614	2309991	693805	678396	669983	2',3'-iO/i-methyl-rhamnosyl tetracyclic spinosyn pseudoaglycone	2',3'-iO/i-methyl-rhamnosyl tetracyclic spinosyn pseudoaglycone [ C32 H48 O9, tgt=59.03, overall=59.03 ]	(578.0438, 8258.937)(579.33136, 1212.0167)(560.3199, 102473.4)(561.3223, 22729.14)(562.32367, 1130.2567)(582.3512, 7486.0366)(583.356, 4064.4568)(595.36646, 12432.883)(596.36896, 1151.4667)(599.82526, 16741.33)(601.3211, 7219.1772)	6.8034
2',4,4',6'-tetrahydroxychalcone	1	1	1	1	1	1494283	1	1	1	16047517	16141532	15942973	1	1	1	2',4,4',6'-tetrahydroxychalcone	2',4,4',6'-tetrahydroxychalcone [ C15 H12 O5, tgt= ]	(255.0547, 330717.3)(256.05756, 37128.504)(257.0599, 1386.2201)	7.89243
2,4',5,7-tetrahydroxyisoflavanone	1	1	1	1	1	1	1	1	1	4107353	4194490	4286045	1	1	1	2,4',5,7-tetrahydroxyisoflavanone	2,4',5,7-tetrahydroxyisoflavanone [ C15 H12 O6, tgt= ]	(271.04932, 125649.4)(272.05197, 9997.133)	9.4118
2,4',7-trihydroxyisoflavanone	1	1	1	1	1	1494283	1	1	1	16047517	16141532	15942973	1	1	1	2,4',7-trihydroxyisoflavanone	2,4',7-trihydroxyisoflavanone [ C15 H12 O5, tgt= ]	(255.0547, 330717.3)(256.05756, 37128.504)(257.0599, 1386.2201)	7.89243
2,4-diacetamido-2,4,6-trideoxy-&alpha;-D-mannopyranose	3243594	3147010	3537185	3444244	3283424	3318343	1012645	1105644	1725597	2979843	3032507	3035398	1486449	1515277	1500592	2,4-diacetamido-2,4,6-trideoxy-&alpha;-D-mannopyranose	2,4-diacetamido-2,4,6-trideoxy-&alpha;-D-mannopyranose [ C10 H18 N2 O5, tgt=47.62, overall=47.62 ]	(247.11906, 6256.304)(251.13853, 1718.4166)(248.47026, 4351.331)(248.1487, 237.89)(248.74944, 2171.438)(269.10306, 1997.9067)(252.30373, 10670.46)	2.4806
2,4-diamino-6-ethyl-5,3'-(2-cyclohexylphenoxy)prop-1'-yloxypyrimidine	6078551	6251301	6066373	6980861	6981564	6990540	17778326	18248462	17785872	2746260	2781150	2702029	3280776	133925	3378099	2,4-diamino-6-ethyl-5,3'-(2-cyclohexylphenoxy)prop-1'-yloxypyrimidine	2,4-diamino-6-ethyl-5,3'-(2-cyclohexylphenoxy)prop-1'-yloxypyrimidine [ C23 H32 N4 O3, tgt=77.03, overall=77.03 ]	(413.25708, 47325.277)(415.4572, 13184.607)(415.266, 335.18)(399.24142, 34124.71)(413.2564, 106550.69)(414.25876, 14041.737)(415.26517, 1323.76)(430.29037, 7884.297)(415.2716, 11667.705)(416.277, 1283.87)(436.12576, 3995.6016)(418.55923, 5280.9004)(418.22406, 1802.45)	4.641
2,4-diamino-6-ethyl-5,3'-(2-trifluoromethyl-4-sulphonamidophenoxy)prop-1'-yloxypyrimidine	1	1	1	1	1	1	1	1	1	4653577	4612534	4646103	1	1	1	2,4-diamino-6-ethyl-5,3'-(2-trifluoromethyl-4-sulphonamidophenoxy)prop-1'-yloxypyrimidine	2,4-diamino-6-ethyl-5,3'-(2-trifluoromethyl-4-sulphonamidophenoxy)prop-1'-yloxypyrimidine [ C16 H20 F3 N5 O4 S, tgt= ]	(440.10928, 135031.89)(441.11182, 20757.85)	9.6982
2,4-diamino-6-methyl-5,3'-(3-nitrophenoxy)prop-1'-yloxypyrimidine	664778	736360	771880	852270	819292	799924	1	1	1	358931	353790	361788	4218850	4234085	2480260	2,4-diamino-6-methyl-5,3'-(3-nitrophenoxy)prop-1'-yloxypyrimidine	2,4-diamino-6-methyl-5,3'-(3-nitrophenoxy)prop-1'-yloxypyrimidine [ C14 H19 N5 O4, tgt=71.43, overall=71.43 ]	(321.14658, 3962.8733)(303.6781, 15025.022)(304.13593, 1934.8566)(342.32748, 2884.3728)(343.1848, 407.60336)(322.17093, 35610.312)(323.17535, 3961.0232)(329.13583, 5952.1333)	2.9675
2,4-dihydroxybenzoate	12682387	9627767	1	16980954	7099436	10672721	9311550	7993176	5072610	7991604	4221399	1	6434687	6269427	7026084	2,4-dihydroxybenzoate	2,4-dihydroxybenzoate [ C7 H5 O4, tgt=47.54, overall=47.54 ]	(138.02159, 604.6715)(157.99664, 79276.805)	0.359538
2,4-pyridinedicarboxylate	1	92616	1	1	1	1	1	1	1	1	1	1	1	1	1	2,4-pyridinedicarboxylate	2,4-pyridinedicarboxylate [ C7 H3 N O4, tgt=43.60, overall=43.60 ]	(183.0435, 6523.6)(170.042, 730.37)	2.092
2,5,7-trihydroxyflavanone dibenzoylmethane tautomer	1	1	1	1	1	1494283	1	1	1	16047517	16141532	15942973	1	1	1	2,5,7-trihydroxyflavanone dibenzoylmethane tautomer	2,5,7-trihydroxyflavanone dibenzoylmethane tautomer [ C15 H12 O5, tgt= ]	(255.0547, 330717.3)(256.05756, 37128.504)(257.0599, 1386.2201)	7.89243
2,6,7,4'-tetrahydroxyisoflavanone	1	1	1	1	1	1	1	1	1	4107353	4194490	4286045	1	1	1	2,6,7,4'-tetrahydroxyisoflavanone	2,6,7,4'-tetrahydroxyisoflavanone [ C15 H12 O6, tgt= ]	(271.04932, 125649.4)(272.05197, 9997.133)	9.4118
2,6-dihydroxypseudooxynicotine	4621290	4819592	3305273	3065736	3033696	3003585	356129	362502	348121	203972	200632	211634	2479349	2468822	2518411	2,6-dihydroxypseudooxynicotine	2,6-dihydroxypseudooxynicotine [ C10 H15 N2 O3, tgt=67.39, overall=67.39 ]	(215.12866, 886.99335)(229.14476, 48342.418)(230.1482, 3158.8967)(235.0974, 3163.08)	5.2818
2,7-dihydroxycadalene	610558	653144	661239	1	1	261392	1551536	1602239	1601136	1707458	1680587	1668678	750647	750873	713470	2,7-dihydroxycadalene	2,7-dihydroxycadalene [ C15 H18 O2, tgt= ]	(256.6306, 3408.7222)(258.134, 1351.9266)(215.1297, 7906.4277)(217.41866, 13567.493)(218.14557, 354.125)(233.13942, 90449.805)(234.14325, 5344.1226)(234.34822, 22506.535)(234.1425, 1581.995)(236.65085, 30430.404)(238.54942, 2195.733)(231.16112, 289312.28)(232.16376, 21524.195)	2.7056
22-hydroxydocosanoate	1	1	1	864818	804021	811669	2034614	2093275	1891664	1084397	1020732	1	1	1	1	22-hydroxydocosanoate	22-hydroxydocosanoate [ C22 H43 O3, tgt=17.11, overall=17.11 ]	(338.32642, 47711.445)(339.32935, 5446.792)	18.8396
24-alkyl sterol 2	1	1	1	1	1	1	1	1	1	1849636	1851794	1919229	1	1	1	24-alkyl sterol 2	24-alkyl sterol 2 [ C28 H46 O2, tgt= ]	(421.33408, 3225.7869)(424.34506, 1638.4467)	15.2282
24-alkyl sterol 3	1	1	1	1	1	1	1	1	1	1849636	1851794	1919229	1	1	1	24-alkyl sterol 3	24-alkyl sterol 3 [ C28 H46 O2, tgt= ]	(421.33408, 3225.7869)(424.34506, 1638.4467)	15.2282
24-epicathasterone-22-O-sulfate	577206	1	953634	116151	93778	117901	1611621	1624115	1568292	2030621	2275315	2253085	1	1	1	24-epicathasterone-22-O-sulfate	24-epicathasterone-22-O-sulfate [ C28 H47 O6 S, tgt=47.61, overall=47.61 ]	(512.31616, 6890.8906)(513.6482, 36804.832)(514.3017, 112696.52)(515.304, 24826.531)(516.303, 2391.175)(498.3112, 6057.37)(512.3183, 25533.209)(513.321, 2834.4102)(498.98236, 1506.8501)(514.0076, 8746.327)(513.3252, 886.95)(514.3495, 13095.67)(534.3123, 1422.0634)(520.2998, 3553.98)	5.30746
26-degluco-protodioscin	1	1	1	3591847	3537634	3504263	2686712	2636769	2581547	1	1	1	112413	109318	111510	26-degluco-protodioscin	26-degluco-protodioscin [ C45 H74 O17, tgt=39.39, overall=39.39 ]	(868.4736, 106615.16)(869.47614, 40537.234)(870.47784, 5845.215)(892.4664, 7000.063)(893.46893, 1332.0533)	8.92475
26-hydroxybrassinolide	1	1	1	3859919	4336133	5170289	1	1	1	34542120	34059708	34438612	724363	537136	738189	26-hydroxybrassinolide	26-hydroxybrassinolide [ C28 H48 O7, tgt=13.58, overall=13.58 ]	(521.6607, 313404.53)(522.6637, 78882.22)(523.33154, 12336.095)	16.3064
27-iO/i-demethyl-rifamycin SV	1	1	1	247486	219450	215483	1	1	1	1	1	1	1	1	1	27-iO/i-demethyl-rifamycin SV	27-iO/i-demethyl-rifamycin SV [ C36 H44 N O12, tgt=12.18, overall=12.18 ]	(701.33795, 12727.77)(702.3408, 1187.9033)	7.0115
2-acetamido-4-iO/i-(2-amino-2-deoxy-&beta;-D-glucopyranosyl)-2-deoxy-D-glucose	1	1	1	1	1	1	541402	562238	551816	1	1	1	1	1	1	2-acetamido-4-iO/i-(2-amino-2-deoxy-&beta;-D-glucopyranosyl)-2-deoxy-D-glucose	2-acetamido-4-iO/i-(2-amino-2-deoxy-&beta;-D-glucopyranosyl)-2-deoxy-D-glucose [ C14 H27 N2 O10, tgt= ]	(384.17368, 25655.836)(385.17648, 1830.2799)	5.7684
2-amino-3,7-dideoxy-D-threo-hept-6-ulosonate	1	1	1	1	1	209504	1	1	1	1	1	1	1	1	1	2-amino-3,7-dideoxy-D-threo-hept-6-ulosonate	2-amino-3,7-dideoxy-D-threo-hept-6-ulosonate [ C7 H13 N O5, tgt=43.96, overall=43.96 ]	(177.0786, 302.8)	2.43985
2-amino-4-carboxypyrimidine	1238776	1043895	1068093	1979234	1470587	266549	1214825	875477	1231006	1	180257	172425	462505	419833	447480	2-amino-4-carboxypyrimidine	2-amino-4-carboxypyrimidine [ C5 H4 N3 O2, tgt=51.03, overall=51.03 ]	(123.02628, 6961.724)(123.60695, 6519.495)(124.60566, 1120.5107)(125.032, 1180.7)(161.02275, 19291.338)(162.02422, 982.89996)(163.02037, 617.92163)(146.0137, 6354.973)	1.8654
2-aminomalonate-semialdehyde	115063	123956	129808	110274	104794	105082	107659	108666	115851	106488	104526	105455	111283	111939	105211	2-aminomalonate-semialdehyde	2-aminomalonate-semialdehyde [ C3 H4 N O3, tgt=56.94, overall=56.94 ]	(102.01768, 6713.4497)(128.01457, 142570.48)(129.01572, 19614.785)(110.004616, 587872.56)(111.00556, 66790.42)	2.0124
2-C22:0-DCA-LPA	1	1	1	181662	1930080	1963766	6198853	6308020	6332446	348539	360430	392744	1209711	1193112	1234924	2-C22:0-DCA-LPA	2-C22:0-DCA-LPA [ C25 H46 O9 P, tgt=28.97, overall=28.97 ]	(506.2792, 2886.07)(526.54944, 111359.734)(528.3002, 36025.03)(505.948, 10936.987)(506.2793, 2779.315)(507.28668, 2285.705)(542.1851, 7307.003)(521.91376, 23600.715)(522.3197, 3762.3599)(546.26886, 1563.7733)(529.53577, 3658.0676)	7.844
2'-deamino-2'-hydroxyparomamine	1	246287	241876	451242	461874	468721	1	1	1	1	142516	625646	1	1	1	2'-deamino-2'-hydroxyparomamine	2'-deamino-2'-hydroxyparomamine [ C12 H26 N2 O8, tgt=42.48, overall=42.48 ]	(330.18698, 565.8075)(330.1891, 10431.25)(309.1688, 7406.635)(346.209, 71000.266)(347.6136, 4697.434)(349.21634, 4484.5864)(328.20602, 4472.983)(350.16122, 2797.92)(352.16907, 809.8733)(331.14505, 7613.15)	5.089
2-dehydro-3-deoxy-D-arabinonate	285271	310576	317494	372200	348378	342970	349253	351874	349825	295557	295452	297556	299773	304025	307785	2-dehydro-3-deoxy-D-arabinonate	2-dehydro-3-deoxy-D-arabinonate [ C5 H7 O5, tgt=2.58, overall=2.58 ]	(129.01572, 19187.004)(130.01166, 10378.608)(154.0081, 662.72)	2.0116
2-dehydrolubimin	985997	1073056	1016415	1	1	1	1	1	1	1	1	1	1	1	1	2-dehydrolubimin	2-dehydrolubimin [ C15 H22 O2, tgt=43.90, overall=43.90 ]	(235.17146, 31751.229)(236.17229, 1441.5967)(240.14326, 43475.87)	3.596
2-dehydropantoate	355957	377436	352721	504116	477929	489794	504513	518310	524257	432036	432244	407891	403190	415685	395140	2-dehydropantoate	2-dehydropantoate [ C6 H9 O4, tgt=59.53, overall=59.53 ]	(168.11029, 23722.033)(169.04456, 1697.6423)(170.04137, 610.2955)(151.02937, 147969.86)(152.03055, 16903.568)	2.0036
2'-deoxyadenosine	1	1	1	1620624	113221	1681935	436169	443485	427966	110693	1	1	1	1	1	2'-deoxyadenosine	2'-deoxyadenosine [ C10 H13 N5 O3, tgt=47.46, overall=47.46 ]	(252.53346, 11785.593)(234.09769, 240.945)(253.10704, 22920.334)(237.1122, 24896.262)(255.13371, 3839.9539)	2.3494
2-deoxy-D-glucose 6-phosphate	299186	318449	308998	441246	441748	421648	487713	485010	495431	359290	363455	359198	331691	331445	323138	2-deoxy-D-glucose 6-phosphate	2-deoxy-D-glucose 6-phosphate [ C6 H11 O8 P, tgt=13.54, overall=13.54 ]	(264.06622, 4503.716)(265.00504, 28990.889)(266.00616, 5806.993)	1.997
2'-deoxyguanosine	2726968	2915079	2893056	4108518	4053013	4009113	10898675	11301575	11424758	5810263	5781298	5733465	2463385	2478716	2411176	2'-deoxyguanosine	2'-deoxyguanosine [ C10 H13 N5 O4, tgt=62.53, overall=62.53 ]	(269.1004, 1176.9546)(251.09514, 1001.35333)(251.094, 498.57666)(253.10667, 15317.574)(285.43436, 16395.562)(286.12936, 1925.1232)(267.1225, 51909.055)(268.12332, 4355.6846)	2.8406
2'-deoxymugineate	678489	744014	785652	742659	755317	736357	1	1	1	2425791	1415462	191678	213588	209000	215510	2'-deoxymugineate	2'-deoxymugineate [ C12 H19 N2 O7, tgt=13.75, overall=13.75 ]	(306.13132, 4671.6367)(305.46545, 5895.5913)(321.14993, 7675.453)(303.43048, 9806.033)(304.13913, 821.33)(313.1067, 1364.1849)	2.83125
2-deoxystreptamine	1	1	1	513865	1062598	524513	1	1	1	1	1	1	1	1	1	2-deoxystreptamine	2-deoxystreptamine [ C6 H16 N2 O3, tgt=28.23, overall=28.23 ]	(147.1059, 483.18668)(189.11414, 23497.588)	2.733
2-docosanoyl-glycerol 3-phosphate	129943	141414	1	317875	329099	325332	1863029	1	1876646	1	1	818841	1	1	1	2-docosanoyl-glycerol 3-phosphate	2-docosanoyl-glycerol 3-phosphate [ C25 H49 O7 P, tgt=42.17, overall=42.17 ]	(514.35614, 1650.7)(492.34406, 4459.815)(515.2995, 3930.83)(498.30374, 14616.867)(499.30673, 1150.0267)	7.09254
2-furoate	1108172	1163825	1192689	1219537	1166680	1149952	1204259	1228461	1238543	1050446	1040173	1030437	1029345	1047269	1079386	2-furoate	2-furoate [ C5 H3 O3, tgt=9.90, overall=9.90 ]	(111.00556, 64837.05)(112.001724, 61834.266)(133.99506, 1663.226)	2.013
2-heptyl-3-hydroxy-4(1iH/i)-quinolone	1	1	501868	1	1	1	1	1	1	1	1	1	1011907	1033562	1108755	2-heptyl-3-hydroxy-4(1iH/i)-quinolone	2-heptyl-3-hydroxy-4(1iH/i)-quinolone [ C16H21NO2, tgt= ]	(259.15466, 13563.394)(246.1715, 18743.31)(260.18628, 27866.863)(261.1906, 7441.45)(286.1644, 1441.2734)(287.15982, 11826.603)(265.3877, 6521.8276)	2.9826
2-heptyl-4(1iH/i)-quinolone	354937	379328	339264	1092717	1103197	1085428	1023857	1081384	1083699	689093	705583	694774	915126	941035	937840	2-heptyl-4(1iH/i)-quinolone	2-heptyl-4(1iH/i)-quinolone [ C16 H21 N O, tgt=82.77, overall=82.77 ]	(245.17603, 934829.25)(246.17868, 103074.43)(247.17947, 3993.9495)(227.16626, 3919.3398)(266.14642, 16848.125)(249.14998, 3365.8035)	3.2072
2'-hydroxy 3,6,7,3',4'-pentamethylquercetagetin	645958	681766	644561	1	1	1	1	1	1	13073579	12923515	12767846	2367293	2342419	2389529	2'-hydroxy 3,6,7,3',4'-pentamethylquercetagetin	2'-hydroxy 3,6,7,3',4'-pentamethylquercetagetin [ C20 H20 O9, tgt=50.21, overall=50.21 ]	(422.15466, 185099.98)(423.15732, 38055.58)(424.1588, 6857.27)	12.4177
2'-hydroxy 3,7,3',4'-tetramethylquercetin	1	1	1	1	1	1	1	1	1	1	1	1	755991	670143	759146	2'-hydroxy 3,7,3',4'-tetramethylquercetin	2'-hydroxy 3,7,3',4'-tetramethylquercetin [ C19 H18 O8, tgt= ]	(392.14493, 29005.033)(393.14755, 2646.57)	10.7715
2-hydroxy-1,4-benzoquinone	1569845	1599651	1655025	1728735	1610458	1503635	1662818	1545014	1642015	1480902	1550412	1544018	1428606	1411379	1465718	2-hydroxy-1,4-benzoquinone	2-hydroxy-1,4-benzoquinone [ C6 H3 O3, tgt=48.45, overall=48.45 ]	(127.01883, 50296.39)(104.998764, 2476.5576)(123.6359, 35192.367)(124.57291, 6377.278)(125.03186, 6270.9233)(130.99219, 3848.255)	2.0138
2-hydroxy-4-methylthiobutanoate	1	1	1	102314	93983	88074	1	1	1	1	1	1	1	1	1	2-hydroxy-4-methylthiobutanoate	2-hydroxy-4-methylthiobutanoate [ C5 H9 O3 S, tgt=73.48, overall=73.48 ]	(151.0281, 179679.16)(152.0297, 20384.074)(153.02554, 15969.125)(152.03, 20348.92)(154.0058, 6676.777)(155.0055, 369.335)	2.077
2-hydroxy-5-methylquinone	1	1	1	1981379	1471589	1257730	1103052	1	1	1	1	1	1	1	1	2-hydroxy-5-methylquinone	2-hydroxy-5-methylquinone [ C7 H5 O3, tgt=44.37, overall=44.37 ]	(120.017975, 13004.707)(147.01648, 7916.4795)	0.9304
2-hydroxy-6-oxo-6-(2,3-dihydroxyphenyl)-hexa-2,4-dienoate	426518	442642	461394	1	1	1	1	1	1	1	1	1	1	1	1	2-hydroxy-6-oxo-6-(2,3-dihydroxyphenyl)-hexa-2,4-dienoate	2-hydroxy-6-oxo-6-(2,3-dihydroxyphenyl)-hexa-2,4-dienoate [ C12 H9 O6, tgt= ]	(249.0368, 26655.75)(250.03839, 1917.77)	2.11133
2-hydroxy-6-oxo-6-(2-hydroxyphenyl)-hexa-2,4-dienoate	1	1	1	1	1	1	1	1	1	1	1	1	12696404	12721595	12833544	2-hydroxy-6-oxo-6-(2-hydroxyphenyl)-hexa-2,4-dienoate	2-hydroxy-6-oxo-6-(2-hydroxyphenyl)-hexa-2,4-dienoate [ C12 H9 O5, tgt= ]	(251.08203, 354110.47)(252.08484, 34928.754)(253.08636, 799.1167)	6.314
2-hydroxy-cyclohexane-1-carbonyl-CoA	1262820	1343574	1044904	262960	244238	241365	1631152	1593826	1591569	1473048	1488586	1476181	1875931	1933521	1909250	2-hydroxy-cyclohexane-1-carbonyl-CoA	2-hydroxy-cyclohexane-1-carbonyl-CoA [ C28 H42 N7 O18 P3 S, tgt=35.30, overall=35.30 ]	(894.1684, 5270.271)(895.1619, 438.86)(872.1578, 6138.666)(908.1862, 31063.12)(909.1875, 4056.1865)(910.16626, 777.2933)	23.2296
2'-hydroxydaidzein	1	1	1	1	1	1	1	1	1	4107353	4194490	4286045	1	1	1	2'-hydroxydaidzein	2'-hydroxydaidzein [ C15 H10 O5, tgt= ]	(271.04932, 125649.4)(272.05197, 9997.133)(255.05412, 1694.7401)	9.4118
2'-hydroxydihydrodaidzein	1	1	1	1	1	1494283	1	1	1	16047517	16141532	15942973	1	1	1	2'-hydroxydihydrodaidzein	2'-hydroxydihydrodaidzein [ C15 H12 O5, tgt= ]	(255.0547, 330717.3)(256.05756, 37128.504)(257.0599, 1386.2201)	7.89243
2-hydroxyformononetin	1	1	1	1	1	1	1	1	1	2859638	2884991	2933708	1	1	1	2-hydroxyformononetin	2-hydroxyformononetin [ C16 H12 O5, tgt= ]	(285.06412, 101108.93)(286.06693, 8111.5034)	8.3818
2'-hydroxygenistein	1	1	1	1	1	1	1	1	1	2859638	2884991	2933708	1	1	1	2'-hydroxygenistein	2'-hydroxygenistein [ C15 H9 O6, tgt= ]	(285.06412, 101108.93)(286.06693, 8111.5034)	8.37675
2-hydroxyglutarate	2431818	2560629	2562131	2955193	2822487	2817475	2953255	3027339	3045514	2621162	2633130	2579227	2551931	2547150	2541294	2-hydroxyglutarate	2-hydroxyglutarate [ C5 H6 O5, tgt=58.66, overall=58.66 ]	(151.02965, 143840.2)(128.014, 141645.3)(129.0148, 19930.479)(130.01068, 10283.287)(129.01605, 17283.137)(130.01202, 9524.754)(154.00682, 3311.9846)(155.0055, 295.825)	2.0036
2-hydroxyhexadecanoate	1	1	1	1278366	1290957	1262797	2399847	2419697	2379830	362378	357459	332522	1	299037	1	2-hydroxyhexadecanoate	2-hydroxyhexadecanoate [ C16 H31 O3, tgt=37.01, overall=37.01 ]	(277.20413, 11913.426)(279.01703, 17538.176)(279.55383, 62896.66)(280.22308, 8866.715)	13.762
2-hydroxylaminobenzoate	285106	290172	282818	1	305234	302158	328021	316678	335655	281018	297674	285887	268226	268510	283561	2-hydroxylaminobenzoate	2-hydroxylaminobenzoate [ C7 H6 N O3, tgt=36.20, overall=36.20 ]	(152.03061, 17336.566)(153.02686, 12543.956)(161.02274, 5870.4644)(162.02435, 466.495)	2.00536
2-icis/i,4-itrans/i-xanthoxin	1	1	1	265451	249109	243583	1	1	1	1	1	1	1	1	1	2-icis/i,4-itrans/i-xanthoxin	2-icis/i,4-itrans/i-xanthoxin [ C15 H22 O3, tgt=18.93, overall=18.93 ]	(276.14688, 4885.1567)(255.13257, 10689.946)	2.3042
2-icis/i-abscisate	1	1	1	1	1	1	5635540	5232178	5318758	7587899	8475866	1	1	1	6868740	2-icis/i-abscisate	2-icis/i-abscisate [ C15H19O4, tgt= ]	(263.1299, 45961.81)(264.13245, 1694.98)(247.11871, 1981.04)(249.80432, 1743.8434)(281.16342, 983.01)	3.3812
2-iN/i-acetamidomethylphosphonate	285106	300541	282818	622384	587521	580954	604213	590329	440832	313984	341054	324628	295898	296872	317131	2-iN/i-acetamidomethylphosphonate	2-iN/i-acetamidomethylphosphonate [ C3 H7 N O4 P, tgt=21.19, overall=21.19 ]	(170.04137, 625.57544)(152.03065, 17079.293)(153.02695, 12286.724)(157.9965, 16892.545)	2.0162
2'-iN/i-acetylparomamine	3532617	3617355	3489057	417079	411298	350602	4718973	3952482	3770830	799456	838716	806763	320283	323229	307318	2'-iN/i-acetylparomamine	2'-iN/i-acetylparomamine [ C14 H29 N3 O8, tgt=44.26, overall=44.26 ]	(371.20996, 13059.267)(350.19058, 5216.27)(350.19397, 66178.586)(351.19638, 6744.5366)(386.23236, 37306.24)(386.2305, 4364.533)(392.19247, 19814.217)(392.90207, 6465.6846)	5.02133
2'-iO/i-methylisoliquiritigenin	1	1	1	1	1	1	1	1	1	1	1	1	1225860	1203696	1209268	2'-iO/i-methylisoliquiritigenin	2'-iO/i-methylisoliquiritigenin [ C16 H14 O4, tgt= ]	(252.08484, 40955.496)(253.08636, 963.79663)	6.298
2'-iO/i-methyl-rhamnosyl tetracyclic spinosyn pseudoaglycone	861343	959285	880434	276841	281515	281587	1	1	1	318412	2109841	2125961	195797	193368	189671	2'-iO/i-methyl-rhamnosyl tetracyclic spinosyn pseudoaglycone	2'-iO/i-methyl-rhamnosyl tetracyclic spinosyn pseudoaglycone [ C31 H46 O9, tgt=46.87, overall=46.87 ]	(562.2986, 880.8)(544.8042, 13938.178)(547.3099, 6704.13)(548.3271, 700.63)(565.4718, 15798.565)(567.3345, 13408.75)(546.3016, 15082.6)(547.3043, 1375.87)(582.7775, 6527.7583)(582.34375, 1623.605)(587.55, 3197.8374)(571.3077, 37716.2)(572.81213, 13358.652)	5.70333
2-iR/i-hydroperoxy-linolenate	1	1	1	1	328125	333147	1	1	1	1	1	1	1	1	1	2-iR/i-hydroperoxy-linolenate	2-iR/i-hydroperoxy-linolenate [ C18 H30 O4, tgt= ]	(335.2031, 2571.855)(295.21265, 11426.59)	11.213
2-isopropylmaleate	1059102	1133389	1157466	1	1	268756	1013075	1055186	1046478	1	1	1	462505	473007	447480	2-isopropylmaleate	2-isopropylmaleate [ C7 H8 O4, tgt=41.14, overall=41.14 ]	(177.0786, 213.08)(183.04347, 2190.0984)(161.02278, 24829.629)(162.02422, 1206.3517)(163.02037, 760.9483)	2.2241
2-itrans/i,-6-itrans/i-farnesyl monophosphate	401325	465516	451486	2283643	2238210	2222831	585596	638365	607734	397298	403792	392331	1350927	1372527	1336951	2-itrans/i,-6-itrans/i-farnesyl monophosphate	2-itrans/i,-6-itrans/i-farnesyl monophosphate [ C15 H25 O4 P, tgt=47.50, overall=47.50 ]	(303.151, 168.05666)(304.16348, 13967.977)(284.64914, 1677.9116)(303.91556, 11122.63)(304.66553, 13352.878)(305.16504, 951.54004)(286.1623, 6362.4155)(318.18817, 7855.378)(300.17844, 6569.462)(301.17953, 298.54666)(306.1309, 303.35498)	2.7618
2-itrans/i-abscisate	1	1	1	1	1	1	5635540	5232178	5318758	7587899	8475866	1	1	1	6868740	2-itrans/i-abscisate	2-itrans/i-abscisate [ C15H19O4, tgt= ]	(263.1299, 45961.81)(264.13245, 1694.98)(247.11871, 1981.04)(249.80432, 1743.8434)(281.16342, 983.01)	3.3812
2-itrans/i-dodecenoyl-CoA	1	1	1	355241	1	338729	491787	493115	485379	426430	430255	437148	665899	705338	681486	2-itrans/i-dodecenoyl-CoA	2-itrans/i-dodecenoyl-CoA [ C33 H52 N7 O17 P3 S, tgt=34.56, overall=34.56 ]	(966.2227, 20821.992)(967.22424, 2007.7928)	23.387
2-ketocyclohexane-1-carbonyl-CoA	121614	106805	111290	108158	104903	92140	122619	107640	108050	107136	94528	104574	108314	114357	178295	2-ketocyclohexane-1-carbonyl-CoA	2-ketocyclohexane-1-carbonyl-CoA [ C28 H40 N7 O18 P3 S, tgt=4.02, overall=4.02 ]	(887.15845, 3712.9788)(870.71185, 3480.2673)(894.1679, 7412.355)(872.15607, 3967.1328)(908.1883, 23658.52)(909.1897, 3391.55)(910.1658, 735.055)(887.16473, 2727.115)(898.12964, 564.525)	22.2209
2-methoxy-6-(iall-trans/i-octaprenyl)phenol	1	1	1	1	1	1	1	1	1	747787	727701	347809	380686	489619	487917	2-methoxy-6-(iall-trans/i-octaprenyl)phenol	2-methoxy-6-(iall-trans/i-octaprenyl)phenol [ C47 H72 O2, tgt=3.69, overall=3.69 ]	(691.53394, 10870.36)(675.5269, 26401.49)(676.5304, 10454.893)	21.861
2-methoxy-6-iall trans/i-nonaprenyl-2-methoxy-1,4-benzoquinol	801536	826409	1	1	772371	768169	437298	413985	448708	838308	831186	836445	896965	883227	869736	2-methoxy-6-iall trans/i-nonaprenyl-2-methoxy-1,4-benzoquinol	2-methoxy-6-iall trans/i-nonaprenyl-2-methoxy-1,4-benzoquinol [ C52 H80 O3, tgt=12.66, overall=12.66 ]	(752.6276, 14183.261)(753.63055, 3205.8533)(777.5892, 15030.925)(778.5914, 4628.169)(762.58704, 88324.36)(763.58954, 33585.1)	21.8603
2-methoxy-6-iall trans/i-octaprenyl-2-methoxy-1,4-benzoquinol	1130298	1189361	2075833	1996406	1926688	1898221	2657697	2626059	2593775	2222653	1041752	1049239	1191838	1179855	1146097	2-methoxy-6-iall trans/i-octaprenyl-2-methoxy-1,4-benzoquinol	2-methoxy-6-iall trans/i-octaprenyl-2-methoxy-1,4-benzoquinol [ C47 H72 O3, tgt=52.09, overall=52.09 ]	(684.5299, 3140.32)(709.6653, 3548.2358)(712.5415, 16207.425)(713.5424, 4287.04)(690.5314, 52372.434)(691.5334, 15341.966)	21.9662
2-methyl-3-hydroxybutyryl-CoA	404054	423881	396619	283106	246364	254570	307277	266200	254193	286537	248596	470664	478595	477262	470731	2-methyl-3-hydroxybutyryl-CoA	2-methyl-3-hydroxybutyryl-CoA [ C26 H40 N7 O18 P3 S, tgt=52.83, overall=52.83 ]	(865.14734, 10142.582)(866.1515, 2436.0)(851.1375, 1607.14)(850.5692, 27822.5)(851.1445, 6136.759)(852.1206, 1700.585)(887.16034, 1691.8542)(865.1525, 21580.457)(866.1508, 2990.1501)	22.7288
2-methyl-6-geranylgeranyl-1,4-benzoquinol	5043313	5112005	5255959	752137	740217	727439	1	1	1	1	1	1	1	1	1	2-methyl-6-geranylgeranyl-1,4-benzoquinol	2-methyl-6-geranylgeranyl-1,4-benzoquinol [ C27 H40 O2, tgt=12.34, overall=12.34 ]	(424.3061, 216.55)(401.27173, 163146.67)(402.27396, 21008.102)(398.32202, 26068.465)(399.3249, 2395.475)	7.84775
2-methylacetoacetyl-CoA	1777115	1879973	1902226	1945399	1855536	1850724	2284448	2250657	2203113	2025692	2043717	2016346	2493064	2549873	2495973	2-methylacetoacetyl-CoA	2-methylacetoacetyl-CoA [ C26 H38 N7 O18 P3 S, tgt=36.18, overall=36.18 ]	(865.14514, 4578.7827)(843.1334, 8342.265)(850.14557, 56714.63)(879.16547, 45408.293)(880.16693, 5761.7544)(865.1506, 4763.934)	23.1464
2-methylaspartate	2623748	2652183	2667486	2890741	2741887	2594255	2755941	2748515	2858685	2499763	2693777	2665433	2493810	2492386	2669879	2-methylaspartate	2-methylaspartate [ C5 H8 N O4, tgt=32.11, overall=32.11 ]	(130.0444, 264.99)(169.0912, 1876.9801)(170.04137, 576.0361)(151.897, 33811.35)(152.89398, 12055.498)(153.02554, 13474.2)	2.013
2-methylbutanoyl-CoA	975626	956901	1060678	963076	923417	896223	1055102	919457	1040527	1006945	241178	100829	1119006	1145641	1110827	2-methylbutanoyl-CoA	2-methylbutanoyl-CoA [ C26 H40 N7 O17 P3 S, tgt=43.77, overall=43.77 ]	(850.29034, 24413.436)(851.147, 5065.9517)(852.1262, 1686.4883)(853.1279, 296.585)(829.1219, 4305.41)(850.1436, 27820.95)(851.141, 4789.5425)(836.1302, 15457.846)(865.1528, 11683.113)(866.1512, 1076.3516)(871.2964, 2570.411)(853.12335, 887.57495)	22.5706
2-methyl-Icis/I-dienelactone	12682387	9627767	1	16980954	7099436	10672721	9311550	7993176	5072610	7991604	4221399	1	6434687	6269427	7026084	2-methyl-Icis/I-dienelactone	2-methyl-Icis/I-dienelactone [ C7 H5 O4, tgt=47.54, overall=47.54 ]	(138.02159, 604.6715)(157.99664, 79276.805)	0.359538
2-methyl-itrans/i-dienelactone	12682387	9627767	1	16980954	7099436	10672721	9311550	7993176	5072610	7991604	4221399	1	6434687	6269427	7026084	2-methyl-itrans/i-dienelactone	2-methyl-itrans/i-dienelactone [ C7 H5 O4, tgt=47.54, overall=47.54 ]	(138.02159, 604.6715)(157.99664, 79276.805)	0.359538
2-naphthol glucoside	1	1	1	160497	161964	158772	1	1	1	475413	468194	482957	238305	239248	252508	2-naphthol glucoside	2-naphthol glucoside [ C16 H18 O6, tgt=15.41, overall=15.41 ]	(292.11584, 4453.9155)(306.131, 9217.547)	3.4972
2-nonaprenyl-6-hydroxyphenol	1	1	1	1	1	1	1	1	1	1	1	1	121944	122389	118926	2-nonaprenyl-6-hydroxyphenol	2-nonaprenyl-6-hydroxyphenol [ C51 H78 O2, tgt= ]	(724.5984, 6896.0703)	21.3215
2-octaprenylphenol	2803115	2939242	2967636	1	1	1	1	1	1	1	2892195	2884584	3961969	3961510	3937185	2-octaprenylphenol	2-octaprenylphenol [ C46 H70 O, tgt= ]	(661.5142, 71806.445)(662.51624, 19136.805)	21.7982
2-oxo-10-methylthiodecanoate	190048	201637	205951	1	1	1	1	1	1	1	1	1	1	1	1	2-oxo-10-methylthiodecanoate	2-oxo-10-methylthiodecanoate [ C11 H19 O3 S, tgt=34.12, overall=34.12 ]	(237.1144, 26631.908)(258.1, 14229.917)	2.878
2-oxo-4-methylthiobutanoate	1713157	176658	3351271	129548	104920	169197	1	2471378	3262530	3444199	2828713	2468484	210490	2001069	2446900	2-oxo-4-methylthiobutanoate	2-oxo-4-methylthiobutanoate [ C5 H7 O3 S, tgt=42.72, overall=42.72 ]	(130.00275, 16873.717)(153.02563, 14472.55)(130.01125, 6158.399)(168.0436, 12419.116)(169.04471, 991.6949)(151.0301, 65192.54)	1.01464
2-oxo-5-chloro-4-pentenoate	1	1	1	1	1	79384	1	1	1	1	1	1	1	1	1	2-oxo-5-chloro-4-pentenoate	2-oxo-5-chloro-4-pentenoate [ C5H4ClO3, tgt= ]	(155.0057, 392.29)(169.9693, 6021.71)	2.037
2-oxo-5-methylthiopentanoate	1090468	1165300	1191259	1	1	268756	1013075	1055186	1046478	211991	198443	204357	462505	473007	447480	2-oxo-5-methylthiopentanoate	2-oxo-5-methylthiopentanoate [ C6 H9 O3 S, tgt=44.80, overall=44.80 ]	(161.02274, 20779.75)(162.02422, 1198.9917)(163.02037, 756.59)(143.0136, 1051.6666)(145.02881, 2293.2793)	2.219
2-oxo-6-methylthiohexanoate	1	1	1	1	1	1	327851	342109	328745	1	1	1	1	1	1	2-oxo-6-methylthiohexanoate	2-oxo-6-methylthiohexanoate [ C7 H11 O3 S, tgt= ]	(175.03743, 15388.863)(159.04253, 494.85666)	2.296
2-oxobutanoate	126234	130866	136447	135439	125597	127770	136667	134155	227743	131302	123314	120662	123138	129936	123943	2-oxobutanoate	2-oxobutanoate [ C4 H5 O3, tgt=18.64, overall=18.64 ]	(101.02159, 7525.1147)(102.01768, 6374.6016)(127.01884, 55787.168)	2.0132
2-oxoglutaramate	1	1	175890	1	1	1	1	1	1	1	1	1	1	1	1	2-oxoglutaramate	2-oxoglutaramate [ C5 H6 N O4, tgt= ]	(145.0298, 12161.93)(127.0195, 53818.72)	2.001
2-oxohexa-4,5-cyclopropyl-5-enoate	3420731	2786778	2658081	5946950	4393980	3540015	3144742	1303150	1288482	2660741	2293051	2056837	1908222	1821732	1	2-oxohexa-4,5-cyclopropyl-5-enoate	2-oxohexa-4,5-cyclopropyl-5-enoate [ C6 H5 O3, tgt=47.62, overall=47.62 ]	(153.02664, 312.95358)(130.00247, 26244.002)	0.358429
2-oxopenta-3,4-dienoate	1108172	1163825	1192689	1219537	1166680	1149952	1204259	1228461	1238543	1050446	1040173	1030437	1029345	1047269	1079386	2-oxopenta-3,4-dienoate	2-oxopenta-3,4-dienoate [ C5 H3 O3, tgt=9.90, overall=9.90 ]	(111.00556, 64837.05)(112.001724, 61834.266)(133.99506, 1663.226)	2.013
2-oxosuccinamate	1191818	1262937	1222690	1323919	1277149	1259501	1334507	1347317	1386686	1182252	1168056	1150143	1146612	1150993	1145034	2-oxosuccinamate	2-oxosuccinamate [ C4 H4 N O4, tgt=80.70, overall=80.70 ]	(130.01166, 10255.182)(112.001724, 61834.266)(154.00682, 3490.7212)(155.0055, 313.53497)	2.0122
2-phenylacetamide	1	1	1	1	1	1	1	1	1	1	1	1	666618	360258	355333	2-phenylacetamide	2-phenylacetamide [ C8 H9 N O, tgt= ]	(136.06963, 1001.8333)(118.0601, 5031.017)	4.353
2-phenylethyl &beta;-iD/i-glucopyranoside	2726048	2913175	2893425	4108518	4053013	4009113	10898675	11301575	11424758	5810263	5781298	5733465	2463385	2478716	2411176	2-phenylethyl &beta;-iD/i-glucopyranoside	2-phenylethyl &beta;-iD/i-glucopyranoside [ C14 H20 O6, tgt=43.90, overall=43.90 ]	(285.1222, 21922.553)(286.13022, 1514.2374)(267.1212, 30282.885)(268.12366, 762.55664)(267.12286, 57315.598)(268.12326, 5253.9663)(304.1655, 14698.213)(305.16574, 816.36334)(286.43433, 6227.8433)(287.15762, 1744.84)(310.12573, 375.02002)(292.11584, 1137.5356)	2.8444
2-phenylethyl 6-iO/i-&beta;-iD/i-xylopyranosyl-&beta;-iD/i-glucopyranoside	405651	436539	1	675919	641995	619033	1	1	1	1	168577	161832	1	1	170949	2-phenylethyl 6-iO/i-&beta;-iD/i-xylopyranosyl-&beta;-iD/i-glucopyranoside	2-phenylethyl 6-iO/i-&beta;-iD/i-xylopyranosyl-&beta;-iD/i-glucopyranoside [ C19 H28 O10, tgt=57.18, overall=57.18 ]	(416.16473, 13610.189)(399.16208, 27438.955)(400.16507, 1116.8567)(417.40326, 10210.158)(420.21405, 630.115)(422.15366, 1924.4634)(423.15607, 320.98)	10.6559
2-trans-hexadecenal	86394544	86940040	84737648	49816488	49189688	49425496	59148472	58095320	59161832	30483678	29804324	29738204	60615896	59903048	61197076	2-trans-hexadecenal	2-trans-hexadecenal [ C16 H30 O, tgt=39.10, overall=39.10 ]	(242.23749, 2978.219)(242.2395, 6727.85)(263.22586, 6298.43)(245.21675, 467.90335)	16.3372
3&beta;-Hydroxy-9&beta;-pimara-7,15-diene-19,6&beta;-olide	1048856	1082488	2843483	453836	566271	539732	587555	537227	500978	1	2083742	2036708	2727275	607047	2764905	3&beta;-Hydroxy-9&beta;-pimara-7,15-diene-19,6&beta;-olide	3&beta;-Hydroxy-9&beta;-pimara-7,15-diene-19,6&beta;-olide [ C20 H28 O3, tgt=50.02, overall=50.02 ]	(316.20938, 21977.889)(317.21225, 1252.865)(317.2173, 11057.57)(299.19537, 3262.94)(334.2367, 21746.877)(335.2411, 1337.3049)(317.11374, 8587.026)(319.9888, 6263.225)(320.2451, 21520.35)(321.2484, 1157.71)(341.2014, 826.87)(323.1809, 1174.53)	10.7926
3&beta;-hydroxy-9&beta;-pimara-7,15-diene-19,6&beta;-olide	1	1082488	1	1	1	1	1	1	1	1	1	1	1	1	1	3&beta;-hydroxy-9&beta;-pimara-7,15-diene-19,6&beta;-olide	3&beta;-hydroxy-9&beta;-pimara-7,15-diene-19,6&beta;-olide [ C20 H28 O3, tgt=60.51, overall=60.51 ]	(334.2381, 27933.15)(335.241, 1548.11)(316.2217, 6398.31)	14.523
3&beta;-hydroxy-9&beta;-pimara-7,15-diene-19,6&beta;-olide nullnullnull 14.467	1	1	1	1	1	1	1	1	1	1	1	1	1	607047	1	3&beta;-hydroxy-9&beta;-pimara-7,15-diene-19,6&beta;-olide	3&beta;-hydroxy-9&beta;-pimara-7,15-diene-19,6&beta;-olide [ C20 H28 O3, tgt=47.24, overall=47.24 ]	(334.2373, 20866.04)(316.2262, 1959.72)	14.467
3&beta;-hydroxy-9&beta;-pimara-7,15-diene-19,6&beta;-olide nullnullnull 14.467 :1	1	1	1	453836	1	1	1	1	1	1	1	1	1	1	1	3&beta;-hydroxy-9&beta;-pimara-7,15-diene-19,6&beta;-olide	3&beta;-hydroxy-9&beta;-pimara-7,15-diene-19,6&beta;-olide [ C20 H28 O3, tgt=50.02, overall=50.02 ]	(334.2347, 18009.52)(318.2245, 1483.6)(320.2406, 7946.67)	14.467
3&beta;-hydroxy-9&beta;-pimara-7,15-diene-19,6&beta;-olide nullnullnull 14.467 :2	1	1	1	1	1	539732	1	1	1	1	1	1	1	1	1	3&beta;-hydroxy-9&beta;-pimara-7,15-diene-19,6&beta;-olide	3&beta;-hydroxy-9&beta;-pimara-7,15-diene-19,6&beta;-olide [ C20 H28 O3, tgt=50.04, overall=50.04 ]	(316.21, 10896.33)(318.2255, 1583.15)(320.2411, 5750.31)	14.467
3&beta;-hydroxy-9&beta;-pimara-7,15-diene-19,6&beta;-olide nullnullnull 14.467 :3	1	1	1	1	566271	1	1	1	1	1	1	1	1	1	1	3&beta;-hydroxy-9&beta;-pimara-7,15-diene-19,6&beta;-olide	3&beta;-hydroxy-9&beta;-pimara-7,15-diene-19,6&beta;-olide [ C20 H28 O3, tgt=50.03, overall=50.03 ]	(316.2099, 11670.8)(318.2253, 1612.01)(320.2409, 6351.07)	14.467
3&beta;-hydroxy-9&beta;-pimara-7,15-diene-19,6&beta;-olide nullnullnull 14.467 :4	1	1	1	1	1	1	1	537227	1	1	1	1	1	1	1	3&beta;-hydroxy-9&beta;-pimara-7,15-diene-19,6&beta;-olide	3&beta;-hydroxy-9&beta;-pimara-7,15-diene-19,6&beta;-olide [ C20 H28 O3, tgt=38.07, overall=38.07 ]	(334.2358, 19137.54)(316.2247, 1039.23)	14.467
3&beta;-hydroxy-9&beta;-pimara-7,15-diene-19,6&beta;-olide nullnullnull 14.467 :5	1	1	1	1	1	1	1	1	500978	1	1	1	1	1	1	3&beta;-hydroxy-9&beta;-pimara-7,15-diene-19,6&beta;-olide	3&beta;-hydroxy-9&beta;-pimara-7,15-diene-19,6&beta;-olide [ C20 H28 O3, tgt=38.86, overall=38.86 ]	(334.2359, 18583.49)(316.2246, 216.35)	14.467
3&beta;-hydroxy-9&beta;-pimara-7,15-diene-19,6&beta;-olide nullnullnull 14.523	1048856	1	1	1	1	1	1	1	1	1	1	1	1	1	1	3&beta;-hydroxy-9&beta;-pimara-7,15-diene-19,6&beta;-olide	3&beta;-hydroxy-9&beta;-pimara-7,15-diene-19,6&beta;-olide [ C20 H28 O3, tgt=59.10, overall=59.10 ]	(334.2383, 25951.53)(335.2412, 1126.5)(316.2213, 6300.47)	14.523
3&beta;-hydroxy-9&beta;-pimara-7,15-diene-19,6&beta;-olide nullnullnull 14.523 :0	1	1	2843483	1	1	1	1	1	1	1	1	1	1	1	1	3&beta;-hydroxy-9&beta;-pimara-7,15-diene-19,6&beta;-olide	3&beta;-hydroxy-9&beta;-pimara-7,15-diene-19,6&beta;-olide [ C20 H28 O3, tgt=58.71, overall=58.71 ]	(317.2173, 11057.57)(318.2297, 56690.39)(319.2326, 5004.85)(320.2451, 21520.35)(321.2484, 1157.71)	14.523
3&beta;-hydroxycostunolide	8392858	8647739	8580862	1	1	206850	1551536	1602239	1601136	1583305	1568532	1541330	750647	750873	713470	3&beta;-hydroxycostunolide	3&beta;-hydroxycostunolide [ C15 H20 O3, tgt= ]	(233.13684, 46982.79)(249.14986, 469.16)(233.64392, 36444.26)(234.14305, 2052.555)(270.1809, 20089.158)(271.18298, 642.91003)(251.16594, 2546.72)(255.87775, 7583.873)(258.13388, 1273.6832)	2.7252
3&beta;-hydroxyparthenolide	1	1	1	14839510	14524781	14278668	12766376	13144110	13346178	9069664	9248635	9109613	11016858	11192076	11398338	3&beta;-hydroxyparthenolide	3&beta;-hydroxyparthenolide [ C15 H20 O4, tgt=61.62, overall=61.62 ]	(264.13245, 3314.2708)(251.1386, 2781.0945)(265.14313, 166457.38)(266.14587, 14790.005)	3.6936
3-(4'-methylthio)butylmalate	1	1	1	1	1	1	1	1	1	1	1	1	1194083	1178191	1185628	3-(4'-methylthio)butylmalate	3-(4'-methylthio)butylmalate [ C9 H14 O5 S, tgt= ]	(252.08484, 40565.582)(253.08636, 949.98)	5.5282
3-(6'-methylthio)hexylmalate	288976	330228	319374	277045	272220	274830	397892	409697	398254	1	1	1	1	1	1	3-(6'-methylthio)hexylmalate	3-(6'-methylthio)hexylmalate [ C11 H18 O5 S, tgt=26.28, overall=26.28 ]	(269.1004, 2169.6868)(280.1173, 9805.261)(267.12143, 108964.94)	2.748
3-(7'-methylthio)heptylmalate	1119798	1203350	1166222	1	381634	1	2015681	2087105	1	1	1	1	2365226	2360661	2285529	3-(7'-methylthio)heptylmalate	3-(7'-methylthio)heptylmalate [ C12 H20 O5 S, tgt=42.56, overall=42.56 ]	(277.3555, 16994.393)(278.10794, 227.44)(279.11267, 3497.355)(294.1343, 5497.0396)(278.6968, 10468.282)(281.12607, 2138.1824)(281.13815, 5339.5947)(282.1329, 281.08)	3.14933
3-(iall-trans/i-octaprenyl)benzene-1,2-diol	443674	482103	488746	1	1	1	1	1	1	108134	384773	467117	689327	675670	701622	3-(iall-trans/i-octaprenyl)benzene-1,2-diol	3-(iall-trans/i-octaprenyl)benzene-1,2-diol [ C46 H70 O2, tgt= ]	(654.57184, 2025.3633)(677.52014, 2565.5723)(661.514, 47453.953)(662.51575, 13262.457)	21.608
3-(iO/i-geranylgeranyl)-isn/i-glycerol 1-phosphate	547539	594240	602212	289252	998952	1002008	843236	894118	871766	609820	846682	894799	659991	1174179	648595	3-(iO/i-geranylgeranyl)-isn/i-glycerol 1-phosphate	3-(iO/i-geranylgeranyl)-isn/i-glycerol 1-phosphate [ C23 H39 O6 P, tgt=47.55, overall=47.55 ]	(443.3578, 7353.2915)(427.75146, 3573.5586)(429.25034, 2881.2642)(445.78094, 949.215)(466.12955, 9867.498)(468.23566, 211.79001)(448.96042, 6004.7207)(448.24124, 735.17334)	4.67433
3-(methylthio)propanoate	4719139	3764504	3421675	162782	369493	378375	198665	192421	889530	3780867	3341955	3070726	2803927	2732123	2820820	3-(methylthio)propanoate	3-(methylthio)propanoate [ C4 H7 O2 S, tgt=47.44, overall=47.44 ]	(120.018364, 6856.002)(102.00863, 20877.477)(140.04973, 1259.7461)(123.03573, 18610.107)(124.0369, 957.7)	0.773267
3,3',4',5'-tetramethylmyricetin	1	1	1	1	1	1	1	1	1	1	1	1	755991	670143	759146	3,3',4',5'-tetramethylmyricetin	3,3',4',5'-tetramethylmyricetin [ C19 H18 O8, tgt= ]	(392.14493, 29005.033)(393.14755, 2646.57)	10.7715
3,3'-diindolylmethane	498985	588090	572161	81539	512674	1	354257	346884	325570	442626	446325	426151	1	1	1	3,3'-diindolylmethane	3,3'-diindolylmethane [ C17 H14 N2, tgt=18.64, overall=18.64 ]	(247.11858, 6893.7866)(250.1262, 20135.143)(247.11963, 9117.416)(248.1129, 1847.41)(265.145, 7063.88)(266.1482, 290.9)(269.10107, 4106.2983)	2.48761
3,3'-dimethylmyricetin	124308	119333	127248	1	1	1	1	1	1	1	1	1	1	1	1	3,3'-dimethylmyricetin	3,3'-dimethylmyricetin [ C17 H13 O8, tgt=14.05, overall=14.05 ]	(365.09207, 17401.56)(366.09506, 801.2134)(345.0903, 8127.6304)	2.05
3,4,3',4'-tetradehydroisozeaxanthin	1	1	1	1	1	1	1	1	1	1	1	1	522422	487778	1	3,4,3',4'-tetradehydroisozeaxanthin	3,4,3',4'-tetradehydroisozeaxanthin [ C40H52O2, tgt= ]	(570.42957, 585.175)(549.3932, 32756.219)(550.39545, 3473.665)(593.4165, 4377.68)	14.6337
3,4,-dihydroxybutylphosphonate	1	1	1	374713	355848	354438	379868	361770	392958	311411	333183	309131	234494	171136	1	3,4,-dihydroxybutylphosphonate	3,4,-dihydroxybutylphosphonate [ C4 H10 O5 P, tgt=39.04, overall=39.04 ]	(153.02637, 12775.702)(169.04506, 1335.7725)(170.0419, 450.81253)(175.01076, 3009.3025)	1.998
3,4-didehydrorhodopin	1	1	1	1	1	1	121567	96901	120136	1	1	1	1	105999	1	3,4-didehydrorhodopin	3,4-didehydrorhodopin [ C40 H56 O, tgt= ]	(552.4383, 3785.8467)(559.4467, 3239.9976)(552.4406, 3753.1)(581.45795, 2710.2632)	21.1446
3,4-dihydroxy-5-iall-trans/i-hexaprenylbenzoate	620437	651169	631333	1	139333	133280	1	1863735	1	211921	219780	209338	323053	333468	307704	3,4-dihydroxy-5-iall-trans/i-hexaprenylbenzoate	3,4-dihydroxy-5-iall-trans/i-hexaprenylbenzoate [ C37 H53 O4, tgt=20.44, overall=20.44 ]	(588.40533, 862.64667)(589.407, 346.59)(544.3814, 24540.154)(545.3861, 6575.04)(562.39954, 9235.453)(584.42865, 18321.604)	11.1058
3,4-dihydroxy-5-iall-trans/i-nonaprenylbenzoate	770864	812583	2511520	2405015	2307374	2275995	111232	2934745	112722	2589356	2550221	2558239	4442042	4555165	4421318	3,4-dihydroxy-5-iall-trans/i-nonaprenylbenzoate	3,4-dihydroxy-5-iall-trans/i-nonaprenylbenzoate [ C52 H77 O4, tgt=42.04, overall=42.04 ]	(768.03394, 2660.5823)(770.5808, 11487.197)(771.582, 4018.4612)(749.065, 3620.3826)(769.57886, 1061.0634)(770.5832, 9126.31)(771.58417, 2626.72)(748.5704, 60350.547)(749.5721, 22442.94)(783.5947, 3077.526)(792.90234, 8016.724)(793.5951, 1152.6774)(794.5849, 997.86005)(771.569, 1843.13)	22.2378
3',4'-dimethylmyricetin	124308	119333	127248	1	1	1	1	1	1	1	1	1	1	1	1	3',4'-dimethylmyricetin	3',4'-dimethylmyricetin [ C17 H13 O8, tgt=14.05, overall=14.05 ]	(365.09207, 17401.56)(366.09506, 801.2134)(345.0903, 8127.6304)	2.05
3,5-dihydroxyanisole	221611	241711	255650	347344	319670	310535	316377	321766	325377	286711	274056	270780	277627	284104	270097	3,5-dihydroxyanisole	3,5-dihydroxyanisole [ C7 H8 O3, tgt=38.92, overall=38.92 ]	(140.04967, 4192.5356)(123.03616, 86680.586)(168.04443, 22424.01)(145.02872, 13646.869)	2.0106
3,5-dihydroxybenzoate	12682387	9627767	1	16980954	7099436	10672721	9311550	7993176	5072610	7991604	4221399	1	6434687	6269427	7026084	3,5-dihydroxybenzoate	3,5-dihydroxybenzoate [ C7 H5 O4, tgt=47.54, overall=47.54 ]	(138.02159, 604.6715)(157.99664, 79276.805)	0.359538
3,6,7,2',4'-pentamethylquercetagetin	645958	681766	644561	1	1	1	1	1	1	13073579	12923515	12767846	2367293	2342419	2389529	3,6,7,2',4'-pentamethylquercetagetin	3,6,7,2',4'-pentamethylquercetagetin [ C20 H20 O9, tgt=50.21, overall=50.21 ]	(422.15466, 185099.98)(423.15732, 38055.58)(424.1588, 6857.27)	12.4177
3,6,7,2',4'-pentamethylquercetagetin 3'-iO/i-&beta;-iD/i-glucoside	1	1	1	1	1	1	1	1	1	1164111	1151380	1170597	1106387	1103189	1138996	3,6,7,2',4'-pentamethylquercetagetin 3'-iO/i-&beta;-iD/i-glucoside	3,6,7,2',4'-pentamethylquercetagetin 3'-iO/i-&beta;-iD/i-glucoside [ C26 H30 O14, tgt= ]	(585.21027, 44334.48)(586.2129, 9488.059)	12.055
3,6,7,3'-tetramethylquercetagetin	1	1	1	1	1	1	1	1	1	1	1	1	755991	670143	759146	3,6,7,3'-tetramethylquercetagetin	3,6,7,3'-tetramethylquercetagetin [ C19 H18 O8, tgt= ]	(392.14493, 29005.033)(393.14755, 2646.57)	10.7715
3,6,7,4'-tetramethylquercetagetin	1	1	1	1	1	1	1	1	1	1	1	1	755991	670143	759146	3,6,7,4'-tetramethylquercetagetin	3,6,7,4'-tetramethylquercetagetin [ C19 H18 O8, tgt= ]	(392.14493, 29005.033)(393.14755, 2646.57)	10.7715
3,6-dihydronicotinate	425135	454480	459790	533872	500797	486314	504972	501623	508930	440385	438546	439355	427780	431652	438796	3,6-dihydronicotinate	3,6-dihydronicotinate [ C6 H6 N O2, tgt=2.46, overall=2.46 ]	(124.036415, 8431.588)(125.03252, 6359.3003)(129.0158, 18611.62)(130.01176, 10076.499)	2.0138
3,7,3',4'-tetramethylquercetin 2'-iO/i-&beta;-iD/i-glucoside	1	1	1	1	1	1	1	1	1	3105311	2723787	2716553	121048	130145	127157	3,7,3',4'-tetramethylquercetin 2'-iO/i-&beta;-iD/i-glucoside	3,7,3',4'-tetramethylquercetin 2'-iO/i-&beta;-iD/i-glucoside [ C25 H28 O13, tgt= ]	(523.1606, 3101.7834)(523.1613, 3542.36)(559.208, 61098.348)(560.2105, 14690.427)(536.85077, 30370.479)(537.19214, 16659.69)	12.0455
3,7,3',5'-tetramethylmyricetin	1	1	1	1	1	1	1	1	1	1	1	1	755991	670143	759146	3,7,3',5'-tetramethylmyricetin	3,7,3',5'-tetramethylmyricetin [ C19 H18 O8, tgt= ]	(392.14493, 29005.033)(393.14755, 2646.57)	10.7715
3,7,4'-trimethylquercetin 2'-iO/i-&beta;-iD/i-glucoside	1	1	1	1	1	1	1	1	1	352782	1	1	1	1	1	3,7,4'-trimethylquercetin 2'-iO/i-&beta;-iD/i-glucoside	3,7,4'-trimethylquercetin 2'-iO/i-&beta;-iD/i-glucoside [ C24 H26 O13, tgt= ]	(522.175, 6132.66)(523.16, 2930.74)	6.349
3,9-dihydroxypterocarp-6a-en	1	1	1	1	1	1494283	1	1	1	16047517	16141532	15942973	1	1	1	3,9-dihydroxypterocarp-6a-en	3,9-dihydroxypterocarp-6a-en [ C15 H10 O4, tgt= ]	(255.0547, 330717.3)(256.05756, 37128.504)(257.0599, 1386.2201)	7.89243
3-[(3aiS/i,4iS/i,7aiS/i)-7a-methyl-1,5-dioxo-octahydro-1iH/i-inden-4-yl]propanoate	816526	872393	873514	1224598	1184405	1179708	6806588	7004529	7082794	2358992	2380930	2246068	1583959	1602216	1596053	3-[(3aiS/i,4iS/i,7aiS/i)-7a-methyl-1,5-dioxo-octahydro-1iH/i-inden-4-yl]propanoate	3-[(3aiS/i,4iS/i,7aiS/i)-7a-methyl-1,5-dioxo-octahydro-1iH/i-inden-4-yl]propanoate [ C13 H17 O4, tgt=46.69, overall=46.69 ]	(237.1132, 36705.707)(238.11594, 2360.047)(259.15466, 9993.853)(240.14198, 37234.605)(241.14568, 1286.4567)(245.10268, 2500.6343)	2.8056
3-[(8Z,11E,13Z)-pentadeca-8,11,13-trien-1-yl] )catechol	1	1	1	1	1	1	2555363	2541164	2537445	898433	906278	911248	1	1	1	3-[(8Z,11E,13Z)-pentadeca-8,11,13-trien-1-yl] )catechol	3-[(8Z,11E,13Z)-pentadeca-8,11,13-trien-1-yl] )catechol [ C21H30O2, tgt= ]	(315.2391, 5223.555)(297.2296, 22379.074)(298.23227, 1399.7666)(337.22043, 44830.13)(338.2234, 3011.6348)	11.9543
30-hydroxy-11-oxo-&beta;-amyrin	1	1	1	1	1	1	1	1	1	1	1	1	690296	653049	676649	30-hydroxy-11-oxo-&beta;-amyrin	30-hydroxy-11-oxo-&beta;-amyrin [ C30H48O3, tgt= ]	(462.33435, 29191.82)(463.33646, 804.31006)	14.1893
3-acetamidopropanal	203685	220135	218996	1	1	1	1	1	1	626005	615028	608171	1	1	1	3-acetamidopropanal	3-acetamidopropanal [ C5 H9 N O2, tgt=42.40, overall=42.40 ]	(118.070915, 54864.254)(120.07617, 97216.875)(121.0792, 2736.7668)(138.049, 11173.055)	2.63467
3-amino-5-hydroxybenzoate	285106	290172	282818	1	305234	302158	328021	316678	335655	281018	297674	285887	268226	268510	283561	3-amino-5-hydroxybenzoate	3-amino-5-hydroxybenzoate [ C7 H6 N O3, tgt=36.20, overall=36.20 ]	(152.03061, 17336.566)(153.02686, 12543.956)(161.02274, 5870.4644)(162.02435, 466.495)	2.00536
3-carboxy-4-methoxy-N-methyl-2-pyridone	1	1	93788	1	1	1	1	1	1	1	1	1	1	1	1	3-carboxy-4-methoxy-N-methyl-2-pyridone	3-carboxy-4-methoxy-N-methyl-2-pyridone [ C8 H8 N O4, tgt= ]	(183.0439, 6606.39)(168.0447, 23099.06)(169.0459, 2078.02)	2.083
3-dehydrosphinganine	256477312	255713600	292361152	1	1	1	1	1	1	1	1	1	183885824	183521024	187993840	3-dehydrosphinganine	3-dehydrosphinganine [ C18 H38 N O2, tgt= ]	(284.78256, 39799.004)(285.28766, 3676.6033)(286.28995, 87.884995)(285.2866, 811.0933)(308.28235, 2129.6416)	16.6398
3-demethylubiquinol-i8/i	872560	932247	2828480	2357705	2282233	2242098	1062882	974337	973405	954549	940396	961126	933438	942034	933572	3-demethylubiquinol-i8/i	3-demethylubiquinol-i8/i [ C48 H74 O4, tgt=56.53, overall=56.53 ]	(719.5554, 1998.38)(696.53436, 1291.9408)(697.5427, 4744.73)(698.5444, 479.07)(697.5385, 21951.115)(698.54065, 5546.033)(740.6248, 980.552)(741.5616, 12416.752)(742.56335, 2195.9636)(719.5501, 37121.7)(720.5521, 11324.469)	22.1994
3'-deoxyadenosine	1	1	1	1620624	113221	1681935	436169	443485	427966	110693	1	1	1	1	1	3'-deoxyadenosine	3'-deoxyadenosine [ C10 H13 N5 O3, tgt=47.46, overall=47.46 ]	(252.53346, 11785.593)(234.09769, 240.945)(253.10704, 22920.334)(237.1122, 24896.262)(255.13371, 3839.9539)	2.3494
3-dimethylallyl-4-hydroxybenzoate	1	1	1	1	1	1	1	1	1	1	1	1	163039	185883	152523	3-dimethylallyl-4-hydroxybenzoate	3-dimethylallyl-4-hydroxybenzoate [ C12 H13 O3, tgt= ]	(191.09514, 6532.877)(205.11015, 6586.4165)	2.228
3-geranyl-4-hydroxybenzoate	1	1	1	265451	249109	243583	1	1	1	1188556	1236852	1212514	1	1	1	3-geranyl-4-hydroxybenzoate	3-geranyl-4-hydroxybenzoate [ C17 H21 O3, tgt=32.89, overall=32.89 ]	(255.13257, 10689.946)(274.17374, 18947.436)(296.1351, 53514.03)(297.13733, 830.36005)(279.12357, 5372.154)(281.1361, 18730.336)	5.905
3-hydroxy-&beta;-ionone	594122	633282	604340	1	1	1	1	1	1	1	1	1	1	1	1	3-hydroxy-&beta;-ionone	3-hydroxy-&beta;-ionone [ C13 H20 O2, tgt=46.09, overall=46.09 ]	(209.15657, 18618.057)(233.14113, 15147.37)	3.142
3-hydroxy-16-methoxy-2,3-dihydrotabersonine	181480	232395	339729	213321	207885	213619	1431729	1511280	5033601	324332	341774	811576	367810	373805	260068	3-hydroxy-16-methoxy-2,3-dihydrotabersonine	3-hydroxy-16-methoxy-2,3-dihydrotabersonine [ C22 H29 N2 O4, tgt=45.36, overall=45.36 ]	(389.212, 61.49)(369.7081, 7799.064)(373.2262, 3674.725)(404.2503, 2757.6301)(385.22775, 10900.205)(386.2307, 4390.6)(409.49878, 7373.3335)(392.6146, 11284.448)(393.35068, 44679.477)(394.46216, 7262.0225)	4.818
3-hydroxy-3-phenylpropanoyl-CoA	1	1	1	123156	120115	1	1	1	1	1	1	1	1	1	1	3-hydroxy-3-phenylpropanoyl-CoA	3-hydroxy-3-phenylpropanoyl-CoA [ C30 H40 N7 O18 P3 S, tgt=12.96, overall=12.96 ]	(916.17505, 791.07996)	22.9767
3-hydroxy-9-apo-&delta;-caroten-9-one	594122	633282	604340	1	1	1	1	1	1	1	1	1	1	1	1	3-hydroxy-9-apo-&delta;-caroten-9-one	3-hydroxy-9-apo-&delta;-caroten-9-one [ C13 H20 O2, tgt=46.09, overall=46.09 ]	(209.15657, 18618.057)(233.14113, 15147.37)	3.142
3-hydroxyanthranilate	285106	290172	282818	1	305234	302158	328021	316678	335655	281018	297674	285887	268226	268510	283561	3-hydroxyanthranilate	3-hydroxyanthranilate [ C7 H6 N O3, tgt=36.20, overall=36.20 ]	(152.03061, 17336.566)(153.02686, 12543.956)(161.02274, 5870.4644)(162.02435, 466.495)	2.00536
3-hydroxyaspartate	169770	182752	193510	198234	169939	175605	185380	184365	192712	166556	168967	167559	176049	174670	176726	3-hydroxyaspartate	3-hydroxyaspartate [ C4 H6 N O5, tgt=80.70, overall=80.70 ]	(151.02939, 157661.25)(152.03055, 18119.223)(130.01166, 10768.614)(154.0068, 3465.3142)(155.0055, 323.16998)	2.0044
3-hydroxybenzaldehyde	991229	1092639	1079974	1265681	1230485	1247575	1295514	1357577	1377094	1199857	1148840	1138801	1169377	1204434	1152928	3-hydroxybenzaldehyde	3-hydroxybenzaldehyde [ C7 H6 O2, tgt=38.92, overall=38.92 ]	(123.03616, 84014.69)(145.02872, 12991.059)(127.21799, 72651.85)	2.0036
3-hydroxybenzoate	1	1	1	1981379	1471589	1257730	1103052	1	1	1	1	1	1	1	1	3-hydroxybenzoate	3-hydroxybenzoate [ C7 H5 O3, tgt=44.37, overall=44.37 ]	(120.017975, 13004.707)(147.01648, 7916.4795)	0.9304
3-hydroxybutanoyl-CoA	3625851	3784500	3768140	4154916	3967554	3901978	4528236	4398879	4315831	3973977	4006274	3957527	4790650	4856599	4759511	3-hydroxybutanoyl-CoA	3-hydroxybutanoyl-CoA [ C25 H38 N7 O18 P3 S, tgt=36.11, overall=36.11 ]	(836.1292, 1253.4802)(850.15063, 67913.164)(851.1519, 8287.34)(871.35364, 5963.2944)(872.16016, 9647.937)(850.145, 75763.9)(851.14624, 9194.139)(852.1237, 2826.806)	23.0594
3-hydroxy-D-aspartate	169770	182752	193510	198234	169939	175605	185380	184365	192712	166556	168967	167559	176049	174670	176726	3-hydroxy-D-aspartate	3-hydroxy-D-aspartate [ C4 H6 N O5, tgt=80.70, overall=80.70 ]	(151.02939, 157661.25)(152.03055, 18119.223)(130.01166, 10768.614)(154.0068, 3465.3142)(155.0055, 323.16998)	2.0044
3-hydroxy-decanoyl-CoA	1	1	1	1	1	1	1	1	1	1	1	1	248621	256650	249328	3-hydroxy-decanoyl-CoA	3-hydroxy-decanoyl-CoA [ C31 H50 N7 O18 P3 S, tgt= ]	(937.2066, 19040.979)(938.2078, 2734.5598)(916.1821, 704.81006)(959.21704, 1511.25)	23.375
3-hydroxyechinenone	1	1	1	208817	672520	662561	633085	652369	605891	108584	111541	1	1248312	1180635	1236168	3-hydroxyechinenone	3-hydroxyechinenone [ C40 H54 O2, tgt=37.61, overall=37.61 ]	(549.3898, 23583.316)(550.39246, 1121.53)(549.3934, 34875.547)(550.3957, 3579.3533)(589.4562, 4971.9)(567.1096, 4953.3965)(593.41437, 2804.2864)(571.40173, 8189.3555)	16.9673
3''-hydroxy-geranylhydroquinone	3514699	3617069	3576802	1	1	1	1	1	1	1	1	2734492	1	1	1	3''-hydroxy-geranylhydroquinone	3''-hydroxy-geranylhydroquinone [ C16 H22 O3, tgt=41.32, overall=41.32 ]	(263.16562, 92552.336)(264.16736, 8843.28)(265.18155, 1354030.6)(266.1846, 197350.25)(267.19067, 15165.266)(290.1587, 83.77)(269.1498, 1939.5)	3.33375
3-hydroxy-isobutanoyl-CoA	3625851	3784500	3768140	4154916	3967554	3901978	4528236	4398879	4315831	3973977	4006274	3957527	4790650	4856599	4759511	3-hydroxy-isobutanoyl-CoA	3-hydroxy-isobutanoyl-CoA [ C25 H38 N7 O18 P3 S, tgt=36.11, overall=36.11 ]	(836.1292, 1253.4802)(850.15063, 67913.164)(851.1519, 8287.34)(871.35364, 5963.2944)(872.16016, 9647.937)(850.145, 75763.9)(851.14624, 9194.139)(852.1237, 2826.806)	23.0594
3-hydroxy-L-aspartate	169770	182752	193510	198234	169939	175605	185380	184365	192712	166556	168967	167559	176049	174670	176726	3-hydroxy-L-aspartate	3-hydroxy-L-aspartate [ C4 H6 N O5, tgt=80.70, overall=80.70 ]	(151.02939, 157661.25)(152.03055, 18119.223)(130.01166, 10768.614)(154.0068, 3465.3142)(155.0055, 323.16998)	2.0044
3-hydroxylubimin	985997	1073056	1016415	1	1	1	1	1	1	1	1	1	1	1	1	3-hydroxylubimin	3-hydroxylubimin [ C15 H24 O3, tgt=16.11, overall=16.11 ]	(235.17146, 31751.229)(236.17229, 1441.5967)	3.596
3'-hydroxy-N-methyl-(S)-coclaurine	1	1	1	872134	845220	862675	1113816	1155240	1098903	137168	137164	144208	1	1	1	3'-hydroxy-N-methyl-(S)-coclaurine	3'-hydroxy-N-methyl-(S)-coclaurine [ C18 H22 N O4, tgt=36.72, overall=36.72 ]	(319.49768, 3588.5488)(303.151, 279.80334)(317.66824, 4129.48)(304.16733, 13064.782)(316.17236, 7674.3555)(317.16833, 4593.283)(321.14087, 38958.31)	3.2194
3-hydroxypropanoyl-CoA	488992	519410	515110	1425878	1383975	1324121	1548612	1497232	1506590	1472142	1480115	1497463	1543810	1557690	546285	3-hydroxypropanoyl-CoA	3-hydroxypropanoyl-CoA [ C24 H36 N7 O18 P3 S, tgt=32.34, overall=32.34 ]	(822.26587, 2678.6277)(836.13403, 13096.403)(821.6295, 29451.596)(822.6179, 4931.335)(823.60596, 1762.985)(858.14136, 3373.2664)(836.1292, 29207.727)(837.1277, 4196.5684)	22.5148
3-hydroxyquinine	397826	1	426816	7020225	801026	785923	1510990	1526215	1479993	686776	3557498	6110827	447241	435459	418765	3-hydroxyquinine	3-hydroxyquinine [ C20 H25 N2 O3, tgt=47.62, overall=47.62 ]	(343.69467, 4088.2524)(343.1848, 676.0234)(323.1772, 4293.2334)(345.20493, 9276.716)(346.21442, 5373.515)(359.2165, 24559.688)(360.21426, 6575.017)(344.8865, 30174.186)(343.2243, 14485.66)(365.9113, 9101.08)(366.68756, 1472.095)(347.506, 1120.0667)	3.1498
3-hydroxytetradecanoyl-CoA	1	1	1	1	1	1	1	1	1	1	1	1	353459	371841	372364	3-hydroxytetradecanoyl-CoA	3-hydroxytetradecanoyl-CoA [ C35 H58 N7 O18 P3 S, tgt=13.41, overall=13.41 ]	(995.2452, 16651.75)(996.24664, 1403.1)	23.479
3-icis/i-dodecenoyl-CoA	1	347725	356157	355241	1	338729	491787	493115	485379	426430	430255	437148	665899	705338	681486	3-icis/i-dodecenoyl-CoA	3-icis/i-dodecenoyl-CoA [ C33 H52 N7 O17 P3 S, tgt=34.56, overall=34.56 ]	(966.2237, 20138.262)(967.2252, 1848.8708)	23.3958
3-iO/i-&beta;-D-glucosyl-&beta;-sitosterol	435648	431818	424888	464902	439728	423420	805649	818074	808044	1	488854	1	1572023	1591067	1580832	3-iO/i-&beta;-D-glucosyl-&beta;-sitosterol	3-iO/i-&beta;-D-glucosyl-&beta;-sitosterol [ C35 H60 O6, tgt=49.33, overall=49.33 ]	(580.4535, 1706.2175)(581.4574, 5164.2646)(559.4458, 20140.648)(560.4482, 2158.8052)(599.476, 567.76)(599.43115, 39413.65)(600.4338, 3594.0757)(581.4024, 3638.26)	15.3697
3'-iO/i-demethyl-staurosporine	1	1	1	18264088	21376672	20728936	1	1	1	1	1	1	142937	134592	1	3'-iO/i-demethyl-staurosporine	3'-iO/i-demethyl-staurosporine [ C27 H25 N4 O3, tgt=80.55, overall=80.55 ]	(454.79443, 4972.4795)(441.2038, 11921.025)(456.00375, 4830.916)(441.808, 7403.1704)(471.2247, 205487.36)(472.23056, 76819.586)(473.23508, 8183.03)(455.22015, 6309.535)(476.1942, 259.73)	7.67922
3-keto-indole-3-butyryl-CoA	1	374259	356157	710482	1	677457	983573	986230	970759	852860	860510	874295	1287240	1410676	967344	3-keto-indole-3-butyryl-CoA	3-keto-indole-3-butyryl-CoA [ C33 H45 N8 O18 P3 S, tgt=12.16, overall=12.16 ]	(988.2366, 818.8833)(966.2237, 19999.898)(967.2252, 1830.1415)	23.3958
3'-ketolactose	124308	119333	127248	1	1	1	1	1	1	1	1	1	1	1	1	3'-ketolactose	3'-ketolactose [ C12 H20 O11, tgt=48.21, overall=48.21 ]	(365.09207, 17401.56)(366.09506, 801.2134)	2.05
3-mercaptopropionate	1530354	1559050	1613440	1728735	1610458	1503635	1574083	1527895	1555253	1480902	1550412	1544018	1428606	1411379	1465718	3-mercaptopropionate	3-mercaptopropionate [ C3 H5 O2 S, tgt=86.17, overall=86.17 ]	(104.998764, 2495.222)(110.0046, 511731.28)(123.035446, 76314.086)(124.036415, 7495.519)(125.03252, 5657.151)(130.99219, 3868.2532)(131.99068, 469.30713)(112.98174, 3581.6335)	2.0138
3-methoxy-4-hydroxy-5-iall-trans/i-hexaprenylbenzoate	3692780	3810331	3742122	118260	109876	102819	7924903	7882734	7864622	149549	144987	141224	6033735	6055837	6057840	3-methoxy-4-hydroxy-5-iall-trans/i-hexaprenylbenzoate	3-methoxy-4-hydroxy-5-iall-trans/i-hexaprenylbenzoate [ C38 H55 O4, tgt=28.89, overall=28.89 ]	(558.39856, 208159.45)(559.4013, 46300.72)(560.4031, 3919.6182)(595.45966, 1614.9066)(596.46356, 10465.271)(597.46356, 1702.3818)(602.42206, 8581.0)(603.4248, 1438.7689)	14.5178
3-methylcrotonyl-CoA	137407	164509	162853	2069672	1978459	131094	183029	165857	176945	165052	142636	149814	183971	194145	178936	3-methylcrotonyl-CoA	3-methylcrotonyl-CoA [ C26 H38 N7 O17 P3 S, tgt=52.86, overall=52.86 ]	(851.1345, 2504.6675)(829.1224, 6775.6846)(850.7383, 31388.229)(851.14276, 8775.405)(852.1185, 2149.065)(829.12335, 6983.997)(865.1486, 6640.899)(866.1472, 2738.5024)(851.1362, 2972.7)(851.1323, 2626.34)	22.5946
3-nitrobenzaldehyde	2908853	2942354	2950304	3212128	3047121	2896412	3083962	3065193	3194340	2780781	2991451	2951319	2762036	2760896	2953441	3-nitrobenzaldehyde	3-nitrobenzaldehyde [ C7 H5 N O3, tgt=65.15, overall=65.15 ]	(151.02937, 140705.56)(152.03055, 15918.399)(153.02676, 11601.092)(161.02222, 8371.808)	2.013
3-nonaprenyl-4-hydroxybenzoate	1127904	1208080	3354902	3239206	3153885	527170	701320	687482	677692	615473	629222	1087854	1306935	1428632	1380686	3-nonaprenyl-4-hydroxybenzoate	3-nonaprenyl-4-hydroxybenzoate [ C52 H77 O3, tgt=41.12, overall=41.12 ]	(749.5723, 22124.135)(733.5619, 95759.61)(734.5647, 31228.46)(733.5716, 87430.76)(734.5741, 30193.81)(777.58997, 42981.797)(778.5916, 17736.74)(756.1676, 2039.1881)	22.1892
3-O-&beta;-D-glucoside digitoxigenin	360126	390262	360329	2986207	3100918	3107935	8098970	8442595	8282503	4645369	4668775	2619233	3788924	3725140	3666722	3-O-&beta;-D-glucoside digitoxigenin	3-O-&beta;-D-glucoside digitoxigenin [ C29 H44 O9, tgt=17.05, overall=17.05 ]	(541.82324, 1916.82)(519.0499, 81090.984)(519.30334, 22472.729)(520.3075, 1224.05)(520.2988, 8690.513)(555.3354, 60112.02)(556.33966, 25045.912)(562.29877, 395.63333)(542.54205, 83055.03)(543.5398, 18214.102)(544.79395, 1229.4425)	8.50627
3-O-&beta;-D-glucosyl-brassicasterol	1	1	1	1	1	1	117604	114164	734582	264722	275038	269493	1	364913	1242340	3-O-&beta;-D-glucosyl-brassicasterol	3-O-&beta;-D-glucosyl-brassicasterol [ C34 H56 O6, tgt=47.35, overall=47.35 ]	(542.38806, 4913.1626)(585.03424, 15952.488)(585.41455, 3853.646)(570.4123, 5188.6)	13.0367
3-oxalomalate	1	1	1	521523	516080	502549	538922	549472	553814	454564	457490	1	1	1	1	3-oxalomalate	3-oxalomalate [ C6 H3 O8, tgt=39.93, overall=39.93 ]	(202.98761, 6595.9683)(225.97781, 25822.102)(226.9784, 1709.9685)	2.01
3-oxo-2-(cis-2'-pentenyl)-cyclopentane-1-octanoate	7174679	7414453	7318749	2500215	2415936	2063807	2329480	2286008	2270406	618581	1	605350	3747465	3644194	3818412	3-oxo-2-(cis-2'-pentenyl)-cyclopentane-1-octanoate	3-oxo-2-(cis-2'-pentenyl)-cyclopentane-1-octanoate [ C18 H29 O3, tgt=65.39, overall=65.39 ]	(295.2136, 744.37)(277.20508, 12684.405)(279.0937, 4794.89)(295.2306, 4919.54)(278.5476, 231951.31)(279.55063, 27139.814)(279.2193, 59504.49)(280.2232, 5714.38)(294.6627, 91270.93)(295.69968, 11860.707)(296.24652, 64168.305)(297.25037, 9766.179)(316.2098, 11751.653)	13.772
3-oxo-dodecanoate	446410	502784	1	145580	142027	383144	1	653203	1	1	1	1	1	1	1	3-oxo-dodecanoate	3-oxo-dodecanoate [ C12 H21 O3, tgt=47.51, overall=47.51 ]	(213.14978, 10495.115)(233.19199, 8440.555)(218.12819, 2097.285)	4.804
3-oxohexanoyl-CoA	560396	597191	587211	333446	340638	318906	558387	537804	614933	378754	590267	606894	619652	646735	684666	3-oxohexanoyl-CoA	3-oxohexanoyl-CoA [ C27 H40 N7 O18 P3 S, tgt=15.94, overall=15.94 ]	(880.1505, 215.4)(858.14014, 3142.2073)(879.167, 22903.117)(880.16797, 3265.7483)(881.14435, 1007.70996)(858.1424, 2646.435)(894.16876, 8802.674)(895.167, 381.73)	22.698
3-oxo-myristate	1	1	326284	1	1	1	1	1	1	1	1	1	1	1	1	3-oxo-myristate	3-oxo-myristate [ C14 H25 O3, tgt= ]	(264.1677, 12375.22)(251.1662, 4723.1)	2.4472
3-oxooctanoyl-CoA	1033623	1089254	228199	1131341	1084078	1106156	1382495	1361206	1354475	1241685	1253985	1237665	1621150	1675159	1657621	3-oxooctanoyl-CoA	3-oxooctanoyl-CoA [ C29 H44 N7 O18 P3 S, tgt=11.48, overall=11.48 ]	(908.1878, 47625.5)(909.1891, 6373.2666)(910.16565, 950.87)(923.1874, 1839.7086)(908.1838, 43786.75)(909.18494, 5523.1006)	23.2392
3-oxo-palmitate	659155	764442	1	1	1	1	1	1	1	1	1	1	1	1	1	3-oxo-palmitate	3-oxo-palmitate [ C16 H29 O3, tgt= ]	(251.19336, 8285.575)(292.20093, 15279.449)	10.7843
3-phenylpropanoyl-CoA	1350168	1416205	1424337	1486984	1416516	1408624	1759410	1741960	1705219	1560274	1578304	1550657	1933194	1973750	1938414	3-phenylpropanoyl-CoA	3-phenylpropanoyl-CoA [ C30 H40 N7 O17 P3 S, tgt=43.24, overall=43.24 ]	(881.14624, 2343.4668)(901.17816, 6685.236)(879.9564, 36955.434)(880.3816, 6075.4473)(881.14026, 1305.1729)(916.17975, 520.2793)(901.176, 6511.3936)	23.1464
3S,3'S-astaxanthin	1	1	1	1	1	1	1	1	1	1	1	1	649787	623781	650245	3S,3'S-astaxanthin	3S,3'S-astaxanthin [ C40H52O4, tgt= ]	(614.4225, 21232.41)(615.4273, 10835.036)	15.884
3-sulfinoalanine	285106	300541	282818	368284	349723	352038	371260	1	1	1	341054	324628	295898	296872	317131	3-sulfinoalanine	3-sulfinoalanine [ C3 H6 N O4 S, tgt=37.31, overall=37.31 ]	(155.0055, 304.15997)(133.99435, 1883.14)(154.00745, 2201.2126)(170.0403, 629.565)(153.02689, 12388.562)	2.016
3-undecyl-2-hydroxyl-1,4-naphthoquinone	488520	509288	491646	1585119	1585998	1560297	953192	993025	928391	1	1	1	397560	395034	379419	3-undecyl-2-hydroxyl-1,4-naphthoquinone	3-undecyl-2-hydroxyl-1,4-naphthoquinone [ C22 H30 O2, tgt=32.46, overall=32.46 ]	(309.2149, 8757.456)(309.2134, 11049.708)(349.21667, 15906.474)(331.49692, 7701.7695)	5.3646
4&alpha;,14&alpha;-dimethyl-9&beta;,19-cyclo-5&alpha;-cholest-24-en-3-one	1	1	1	1	1	1	1	1	1	961114	989793	986016	1	1	1	4&alpha;,14&alpha;-dimethyl-9&beta;,19-cyclo-5&alpha;-cholest-24-en-3-one	4&alpha;,14&alpha;-dimethyl-9&beta;,19-cyclo-5&alpha;-cholest-24-en-3-one [ C29 H46 O, tgt= ]	(438.36063, 43994.016)(439.36343, 5620.404)	15.1234
4&alpha;-carboxy,4&beta;,14&alpha;-dimethyl-9&beta;,19-cyclo-5&alpha;-cholest-24-en-3&beta;-ol	1	1	1	1	1	1	1	1	1	2063079	2071264	2147325	339027	316584	335090	4&alpha;-carboxy,4&beta;,14&alpha;-dimethyl-9&beta;,19-cyclo-5&alpha;-cholest-24-en-3&beta;-ol	4&alpha;-carboxy,4&beta;,14&alpha;-dimethyl-9&beta;,19-cyclo-5&alpha;-cholest-24-en-3&beta;-ol [ C30 H47 O3, tgt= ]	(438.36063, 27097.83)(439.36343, 5258.7104)(482.34924, 10537.696)(483.35226, 1206.9667)	15.276
4&alpha;-carboxy-4&beta;,14&alpha;-dimethyl-9&beta;,19-cyclo-5&alpha;-ergost-24(24sup1/sup)-en-3&beta;-ol	1	1	1	1	1	1	1	1	1	1	1	1	320713	310616	312503	4&alpha;-carboxy-4&beta;,14&alpha;-dimethyl-9&beta;,19-cyclo-5&alpha;-ergost-24(24sup1/sup)-en-3&beta;-ol	4&alpha;-carboxy-4&beta;,14&alpha;-dimethyl-9&beta;,19-cyclo-5&alpha;-ergost-24(24sup1/sup)-en-3&beta;-ol [ C31 H49 O3, tgt= ]	(496.3638, 42685.12)(497.36618, 5955.25)(474.33688, 3219.9934)	15.517
4&alpha;-carboxy-5&alpha;-cholesta-7,24-dien-3&beta;-ol	138904	151199	1	108328	1	1	252242	255366	259495	1	1	1	301890	289779	290979	4&alpha;-carboxy-5&alpha;-cholesta-7,24-dien-3&beta;-ol	4&alpha;-carboxy-5&alpha;-cholesta-7,24-dien-3&beta;-ol [ C28 H43 O3, tgt=18.95, overall=18.95 ]	(455.32498, 4396.5605)(433.3133, 11507.496)	13.1734
4&alpha;-carboxy-5&alpha;-cholesta-8,24-dien-3&beta;-ol	138904	151199	1	108328	1	1	252242	255366	259495	1	1	1	301890	289779	290979	4&alpha;-carboxy-5&alpha;-cholesta-8,24-dien-3&beta;-ol	4&alpha;-carboxy-5&alpha;-cholesta-8,24-dien-3&beta;-ol [ C28 H43 O3, tgt=18.95, overall=18.95 ]	(455.32498, 4396.5605)(433.3133, 11507.496)	13.1734
4&alpha;-carboxy-ergosta-7,24(24sup1/sup)-dien-3&beta;-ol	1	1	1	1	1	1	1	1	1	1	365275	377664	414415	390292	391488	4&alpha;-carboxy-ergosta-7,24(24sup1/sup)-dien-3&beta;-ol	4&alpha;-carboxy-ergosta-7,24(24sup1/sup)-dien-3&beta;-ol [ C29 H45 O3, tgt= ]	(424.34464, 8253.1)(468.33438, 5173.5117)(446.32138, 5277.967)	13.6585
4&alpha;-carboxy-stigmasta-7,24(24sup1/sup)-dien-3&beta;-ol	1	1	1	1	1	1	1	1	1	2063079	2071264	2147325	339027	316584	335090	4&alpha;-carboxy-stigmasta-7,24(24sup1/sup)-dien-3&beta;-ol	4&alpha;-carboxy-stigmasta-7,24(24sup1/sup)-dien-3&beta;-ol [ C30 H47 O3, tgt= ]	(438.36063, 27097.83)(439.36343, 5258.7104)(482.34924, 10537.696)(483.35226, 1206.9667)	15.276
4&alpha;-formyl,4&beta;,14&alpha;-dimethyl-9&beta;,19-cyclo-5&alpha;-ergost-24(24sup1/sup)-en-3&beta;-ol	1	1	1	1	1	1	1	1	1	1844287	1846485	1919229	339027	316584	335090	4&alpha;-formyl,4&beta;,14&alpha;-dimethyl-9&beta;,19-cyclo-5&alpha;-ergost-24(24sup1/sup)-en-3&beta;-ol	4&alpha;-formyl,4&beta;,14&alpha;-dimethyl-9&beta;,19-cyclo-5&alpha;-ergost-24(24sup1/sup)-en-3&beta;-ol [ C31 H50 O2, tgt= ]	(482.38382, 40158.74)(483.38705, 4929.8936)	15.276
4&alpha;-formyl-5&alpha;-cholesta-7,24-dien-3&beta;-ol	1	1	1	1	1	1	1	1	1	1005202	1027198	1034438	1	1	1	4&alpha;-formyl-5&alpha;-cholesta-7,24-dien-3&beta;-ol	4&alpha;-formyl-5&alpha;-cholesta-7,24-dien-3&beta;-ol [ C28 H44 O2, tgt= ]	(395.33926, 857.3034)(421.33408, 3503.03)	15.1234
4&alpha;-formyl-5&alpha;-cholesta-8,24-dien-3&beta;-ol	1	1	1	1	1	1	1	1	1	1005202	1027198	1034438	1	1	1	4&alpha;-formyl-5&alpha;-cholesta-8,24-dien-3&beta;-ol	4&alpha;-formyl-5&alpha;-cholesta-8,24-dien-3&beta;-ol [ C28 H44 O2, tgt= ]	(395.33926, 857.3034)(421.33408, 3503.03)	15.1234
4&alpha;-hydroxymethyl-5&alpha;-cholesta-7,24-dien-3&beta;-ol	1	1	1	1	1	1	1	1	1	1849636	1851794	1919229	1	1	1	4&alpha;-hydroxymethyl-5&alpha;-cholesta-7,24-dien-3&beta;-ol	4&alpha;-hydroxymethyl-5&alpha;-cholesta-7,24-dien-3&beta;-ol [ C28 H46 O2, tgt= ]	(421.33408, 3225.7869)(424.34506, 1638.4467)	15.2282
4&alpha;-hydroxymethyl-5&alpha;-cholesta-8,24-dien-3&beta;-ol	1	1	1	1	1	1	1	1	1	1849636	1851794	1919229	1	1	1	4&alpha;-hydroxymethyl-5&alpha;-cholesta-8,24-dien-3&beta;-ol	4&alpha;-hydroxymethyl-5&alpha;-cholesta-8,24-dien-3&beta;-ol [ C28 H46 O2, tgt= ]	(421.33408, 3225.7869)(424.34506, 1638.4467)	15.2282
4&alpha;-hydroxy-tetrahydrobiopterin	1	1	1	137835	1	1	1	1	1	850239	827829	795140	5791005	5783951	5851207	4&alpha;-hydroxy-tetrahydrobiopterin	4&alpha;-hydroxy-tetrahydrobiopterin [ C9 H15 N5 O4, tgt=47.47, overall=47.47 ]	(262.62997, 20054.016)(263.1295, 156990.83)(243.87206, 1140.87)(276.90253, 7012.8604)(279.15872, 132645.02)(280.1613, 13754.816)(257.88684, 20875.855)(280.85992, 175278.6)(282.1129, 20949.387)	4.6796
4&alpha;-methyl-5&alpha;-ergosta-8,14,24(28)-trien-3&beta;-ol	1	1	1	1	1	1	1	1	1	961114	989793	986016	1	1	1	4&alpha;-methyl-5&alpha;-ergosta-8,14,24(28)-trien-3&beta;-ol	4&alpha;-methyl-5&alpha;-ergosta-8,14,24(28)-trien-3&beta;-ol [ C29 H46 O, tgt= ]	(438.36063, 43994.016)(439.36343, 5620.404)	15.1234
4-(&gamma;-glutamylamino)butanal	385489	428243	418305	1	1	1	1	1	1	275509	285864	284531	1	1	1	4-(&gamma;-glutamylamino)butanal	4-(&gamma;-glutamylamino)butanal [ C9 H16 N2 O4, tgt= ]	(219.12518, 48262.56)(234.14326, 8675.37)(218.14536, 2280.575)(222.09267, 10146.224)	2.526
4-(1-methyl-2-pyrrolidinyl)-3-oxobutanoate	4696530	4956123	4912130	4114171	4426507	1	1	1	1	5630401	5752754	5636059	4269675	4291957	4228912	4-(1-methyl-2-pyrrolidinyl)-3-oxobutanoate	4-(1-methyl-2-pyrrolidinyl)-3-oxobutanoate [ C9 H15 N O3, tgt=47.01, overall=47.01 ]	(209.59505, 161.91)(189.11562, 13860.674)(188.93515, 170.92)	2.547
4-(1-methyl-2-pyrrolidinyl)-3-oxobutanoate methyl ester	1	1	1	1	1	1	1	1	1	1	1	1	1	1	201161	4-(1-methyl-2-pyrrolidinyl)-3-oxobutanoate methyl ester	4-(1-methyl-2-pyrrolidinyl)-3-oxobutanoate methyl ester [ C10 H18 N O3, tgt= ]	(203.1303, 245.81)(201.1388, 8265.41)	4.046
4-(1-methyl-2-pyrrolidinyl)-3-oxobutanoyl-CoA	559866	598411	587501	620069	577420	581256	758767	757877	754304	679981	695581	691270	960311	998659	974580	4-(1-methyl-2-pyrrolidinyl)-3-oxobutanoyl-CoA	4-(1-methyl-2-pyrrolidinyl)-3-oxobutanoyl-CoA [ C30 H46 N8 O18 P3 S, tgt=57.52, overall=57.52 ]	(937.2081, 24822.14)(938.2095, 2715.83)(937.1997, 25929.236)(938.201, 2911.0833)(952.2067, 628.99646)(937.20526, 31309.943)(959.20996, 1600.3232)	23.3222
4-(3-methylbut-2-enyl)-L-abrine	3945707	4167861	4063187	957224	946019	962617	1	1	1	1	1	1	1	1	1	4-(3-methylbut-2-enyl)-L-abrine	4-(3-methylbut-2-enyl)-L-abrine [ C17 H22 N2 O2, tgt=18.53, overall=18.53 ]	(286.1637, 42666.145)(287.1676, 4797.94)(274.17145, 451.75998)(288.59158, 30316.275)(289.19412, 1957.1768)(295.15262, 83934.15)(296.15518, 6451.715)	2.818
4,21-dehydrogeissoschizine	1181607	1191439	1214323	3745006	3756610	3744299	590627	618071	587969	465979	488833	471781	1	1	1	4,21-dehydrogeissoschizine	4,21-dehydrogeissoschizine [ C21 H23 N2 O3, tgt=41.04, overall=41.04 ]	(352.16907, 1006.6367)(337.17126, 1054.6816)(352.17526, 13224.886)(334.1599, 66047.414)(335.16232, 5733.9897)(370.70834, 17637.139)(372.88174, 7169.8315)(374.21082, 14317.472)(379.17834, 969.97)	4.3914
4,4'-diapolycopenedial	1	1	1	1	1	1	1144659	1159775	1115872	9436737	10060872	9627198	1	1	403452	4,4'-diapolycopenedial	4,4'-diapolycopenedial [ C30 H36 O2, tgt=13.75, overall=13.75 ]	(428.94873, 8089.0605)(415.27026, 1196.2567)(429.28806, 103703.46)(430.29037, 14734.808)(435.2504, 28838.053)(436.25308, 1917.4327)	4.582
4,5&beta;-dihydrocortisone	1	1	1	795939	1	1	1	1	1	714828	1	441188	801308	814640	774989	4,5&beta;-dihydrocortisone	4,5&beta;-dihydrocortisone [ C21 H30 O5, tgt=47.17, overall=47.17 ]	(345.2029, 13277.81)(346.2132, 1560.01)(347.2111, 2024.88)(345.20065, 9988.428)(346.2162, 1574.6234)(385.20383, 4275.612)(371.2099, 13557.6)	3.7184
4,8,13-trimethylhexadeca-heptaenedial	2583743	2704817	3161148	268861	267218	277118	282767	303987	290343	1	1	1	283326	286578	292066	4,8,13-trimethylhexadeca-heptaenedial	4,8,13-trimethylhexadeca-heptaenedial [ C19 H22 O2, tgt=37.04, overall=37.04 ]	(286.16522, 50090.746)(287.1678, 4202.33)(264.1503, 5018.393)(286.85263, 8434.961)(288.19022, 4606.7065)(270.17957, 7299.0527)(302.1943, 15914.11)(306.66138, 11523.434)(287.14365, 4087.36)	4.1292
4,8-sphingadienine	572958	595254	606542	1	1	1	263627	272008	234090	1388473	1320202	1365121	230535	225956	229332	4,8-sphingadienine	4,8-sphingadienine [ C18 H36 N O2, tgt=41.83, overall=41.83 ]	(282.2682, 174764.61)(283.27097, 20827.236)(284.2837, 149478.73)(285.2865, 16596.033)(300.2771, 1804.4767)(298.2982, 12962.914)	17.5837
4,9,13-trimethyltetradeca-2,4,6,8,10,12-hexaene-1,14-dial	1	1	1	1544880	1470517	1491579	1095254	1112053	1082872	1060679	1037478	1027481	1839620	920504	1823431	4,9,13-trimethyltetradeca-2,4,6,8,10,12-hexaene-1,14-dial	4,9,13-trimethyltetradeca-2,4,6,8,10,12-hexaene-1,14-dial [ C17 H20 O2, tgt=61.94, overall=61.94 ]	(259.55286, 24436.744)(260.1505, 21176.713)(240.1404, 2133.3235)(240.14192, 8785.01)(274.17502, 8716.804)(260.18555, 53132.312)(261.1886, 4110.6587)(281.13644, 11203.249)(282.13846, 756.46674)(262.63126, 41630.316)(264.13306, 2904.3855)(265.14313, 34631.195)(266.14594, 2928.5208)	2.43669
4,9-dimethyldodeca-2,4,6,8,10-pentaene-1,12-dial	385489	428243	418305	1	1	1	1	1	1	275509	285864	284531	1	1	1	4,9-dimethyldodeca-2,4,6,8,10-pentaene-1,12-dial	4,9-dimethyldodeca-2,4,6,8,10-pentaene-1,12-dial [ C14 H16 O2, tgt= ]	(219.12518, 48262.56)(234.14326, 8675.37)(217.14607, 55106.734)(218.14668, 2648.1682)(244.12128, 5636.9253)(223.09862, 11165.423)	2.526
4-aminobenzoate	771970	847204	794172	1	1	1	1	1	1	1	1	1	1	1	1	4-aminobenzoate	4-aminobenzoate [ C7 H6 N O2, tgt= ]	(137.0403, 2385.8267)(138.04926, 2579.1233)	2.6076
4-coumaroyl-3-hydroxyagmatine	174639	250507	233938	666302	629028	638255	1	1	1	368850	362655	378352	1	1	1	4-coumaroyl-3-hydroxyagmatine	4-coumaroyl-3-hydroxyagmatine [ C14 H21 N4 O3, tgt=45.73, overall=45.73 ]	(294.16693, 7693.4136)(276.15808, 3890.525)(294.1685, 5968.0835)(277.44247, 13690.491)(314.53516, 6544.401)(320.163, 2492.7217)(303.151, 309.99002)	3.0018
4-coumaroylagmatine	1789201	1907217	1893742	1	1	1	134992	148419	142062	1	1	2315236	1017137	1073669	1095487	4-coumaroylagmatine	4-coumaroylagmatine [ C14H21N4O2, tgt= ]	(259.72397, 35773.465)(278.17075, 7360.8364)(303.86514, 3119.4263)(304.16794, 1023.72675)(287.1587, 12360.288)	3.21347
4-coumaroylhexanoylmethane	997885	1113466	3357722	6189064	6173871	6175621	738935	741926	744068	3459693	3371206	3620397	1	1	1955212	4-coumaroylhexanoylmethane	4-coumaroylhexanoylmethane [ C16 H20 O3, tgt=44.00, overall=44.00 ]	(261.00067, 79104.44)(262.15002, 14120.039)(246.1366, 28420.707)(261.15054, 1995.984)(265.18143, 127288.71)(286.13632, 3138.6384)(267.12286, 58817.57)(268.12363, 5392.2627)	3.33
4-dihydrocoumaroyl-CoA	1	1	1	123156	120115	1	1	1	1	1	1	1	1	1	1	4-dihydrocoumaroyl-CoA	4-dihydrocoumaroyl-CoA [ C30 H40 N7 O18 P3 S, tgt=12.96, overall=12.96 ]	(916.17505, 791.07996)	22.9767
4-hydroxy-5-methyl-2-methylene-3(2H)-furanone	3420731	2786778	2658081	5946950	4393980	3540015	3144742	1303150	1288482	2660741	2293051	2056837	1908222	1821732	1	4-hydroxy-5-methyl-2-methylene-3(2H)-furanone	4-hydroxy-5-methyl-2-methylene-3(2H)-furanone [ C6 H5 O3, tgt=47.62, overall=47.62 ]	(153.02664, 312.95358)(130.00247, 26244.002)	0.358429
4-hydroxybenzaldehyde	991229	1092639	1079974	1265681	1230485	1247575	1295514	1357577	1377094	1199857	1148840	1138801	1169377	1204434	1152928	4-hydroxybenzaldehyde	4-hydroxybenzaldehyde [ C7 H6 O2, tgt=38.92, overall=38.92 ]	(123.03616, 84014.69)(145.02872, 12991.059)(127.21799, 72651.85)	2.0036
4-hydroxybenzoate	1	1	1	1981379	1471589	1257730	1103052	1	1	1	1	1	1	1	1	4-hydroxybenzoate	4-hydroxybenzoate [ C7 H5 O3, tgt=44.37, overall=44.37 ]	(120.017975, 13004.707)(147.01648, 7916.4795)	0.9304
4-hydroxybenzoyl-acetate	1098067	1185853	1197950	1	1	1	1045405	1087842	1078573	1	1	1	462505	473007	447480	4-hydroxybenzoyl-acetate	4-hydroxybenzoyl-acetate [ C9 H7 O4, tgt=73.41, overall=73.41 ]	(183.04347, 2190.0984)(161.02287, 26742.764)(162.02422, 1221.4618)(163.02037, 771.74506)(165.043, 337.85)	2.223
4-hydroxymandelate	355957	377436	352721	504116	477929	489794	504513	518310	524257	432036	432244	407891	403190	415685	395140	4-hydroxymandelate	4-hydroxymandelate [ C8 H7 O4, tgt=88.85, overall=88.85 ]	(151.02907, 146297.6)(152.0303, 16936.002)(168.04353, 24971.963)(169.04465, 1698.5535)(170.04137, 610.2955)(151.03026, 152568.56)	2.0036
4-hydroxyphenylpyruvate	1098067	1185853	1197950	1	1	1	1045405	1087842	1078573	1	1	1	462505	473007	447480	4-hydroxyphenylpyruvate	4-hydroxyphenylpyruvate [ C9 H7 O4, tgt=73.41, overall=73.41 ]	(183.04347, 2190.0984)(161.02287, 26742.764)(162.02422, 1221.4618)(163.02037, 771.74506)(165.043, 337.85)	2.223
4'-methoxyisoflavan-2',4,7-triol	1	1	1	160497	161964	158772	1	1	1	475413	468194	482957	238305	239248	252508	4'-methoxyisoflavan-2',4,7-triol	4'-methoxyisoflavan-2',4,7-triol [ C16 H16 O5, tgt=15.41, overall=15.41 ]	(292.11584, 4453.9155)(306.131, 9217.547)	3.706
4-methyl-5-(2-phosphonooxyethyl)thiazole	1	1	1	547152	534517	521104	558556	568098	572719	460172	1	1	1	1	1	4-methyl-5-(2-phosphonooxyethyl)thiazole	4-methyl-5-(2-phosphonooxyethyl)thiazole [ C6 H8 N O4 P S, tgt=4.50, overall=4.50 ]	(207.9765, 398.12)(243.98679, 1137.5986)(226.97824, 1776.6755)	1.995
4-methyl-5-nitrocatechol	2915074	2964618	2950304	3265454	3097734	2948693	3135809	3110285	3251643	2811174	3026959	2974563	2785718	2790744	2964076	4-methyl-5-nitrocatechol	4-methyl-5-nitrocatechol [ C7 H7 N O4, tgt=65.15, overall=65.15 ]	(170.0401, 611.83)(151.02937, 141167.84)(152.03055, 15982.922)(153.02676, 11647.928)(170.04147, 578.32996)	2.005
4-methylaminobutanoate	1	1	1	1	1	1	27812862	28524112	28479840	1	1	1	1	1	1	4-methylaminobutanoate	4-methylaminobutanoate [ C5 H11 N O2, tgt= ]	(118.08096, 360782.84)(119.08407, 9395.76)	2.6322
4-methylthiobutylhydroximate	1	1	1	1247346	1	1	1	1	1	1	1	1	1	1	1	4-methylthiobutylhydroximate	4-methylthiobutylhydroximate [ C5 H11 N O S2, tgt=45.81, overall=45.81 ]	(147.0161, 10755.47)(169.0435, 49.71)	0.113
4-methylthiobutylhydroximoyl-glutathione	1	1	1	1	1	1	254328	254230	244047	1405250	1379330	1395749	1	1	1	4-methylthiobutylhydroximoyl-glutathione	4-methylthiobutylhydroximoyl-glutathione [ C15 H25 N4 O7 S2, tgt=35.49, overall=35.49 ]	(441.11377, 4260.3022)(442.11935, 7031.697)(457.13892, 7335.5864)	12.453
4-nitrobenzaldehyde	2908853	2942354	2950304	3212128	3047121	2896412	3083962	3065193	3194340	2780781	2991451	2951319	2762036	2760896	2953441	4-nitrobenzaldehyde	4-nitrobenzaldehyde [ C7 H5 N O3, tgt=65.15, overall=65.15 ]	(151.02937, 140705.56)(152.03055, 15918.399)(153.02676, 11601.092)(161.02222, 8371.808)	2.013
4-nitrophenol	1	1	1	213495	197203	196549	198192	184367	184130	141639	153597	144130	141141	152091	150535	4-nitrophenol	4-nitrophenol [ C6 H4 N O3, tgt=42.93, overall=42.93 ]	(138.02141, 9782.212)(143.03345, 915.673)(140.04955, 4331.6934)(142.99927, 1215.3014)	2.015
4-pregnen-20,21-diol-3-one	1	1	1	1	1	1	1856763	1842962	1842272	592956	602911	598560	1	1	1	4-pregnen-20,21-diol-3-one	4-pregnen-20,21-diol-3-one [ C21 H32 O3, tgt=19.71, overall=19.71 ]	(315.2391, 5393.4297)(337.22043, 45958.08)(338.2234, 3109.0498)	11.914
4-prenylphlorisobutyrophenone	1	1	1	1	1	1	5635540	5232178	5318758	7587899	8475866	1	1	1	6868740	4-prenylphlorisobutyrophenone	4-prenylphlorisobutyrophenone [ C15H19O4, tgt= ]	(263.1299, 45961.81)(264.13245, 1694.98)(247.11871, 1981.04)(249.80432, 1743.8434)(281.16342, 983.01)	3.3812
4-prenylphlorisovalerophenone	1789201	1907217	1893742	3063359	2858572	2890274	738935	747240	744068	590645	587549	592832	1724405	1735594	1710760	4-prenylphlorisovalerophenone	4-prenylphlorisovalerophenone [ C16 H21 O4, tgt=13.77, overall=13.77 ]	(279.156, 627.77)(261.13385, 9146.466)(262.1403, 1000.74)(279.15872, 120127.03)(280.16135, 13164.977)(281.1631, 83.45)(260.77124, 18246.875)(262.14056, 995.2999)(303.1384, 11502.395)(304.13913, 701.4566)(285.12714, 1341.136)(285.12375, 2005.1602)(286.1403, 1982.5499)	2.5416
5-&alpha;-dihydrotestosterone	1	1	1	549411	512987	515777	1	1	1	1	1	1	1	1	1	5-&alpha;-dihydrotestosterone	5-&alpha;-dihydrotestosterone [ C19 H30 O2, tgt=29.23, overall=29.23 ]	(294.22845, 181.53)(296.24448, 20105.018)(318.22507, 2972.4734)	11.1238
5-&alpha;-pregnane-3,20-dione	1	121950	139923	1	1	1	1	1	1	1	1	165122	120836	125960	115800	5-&alpha;-pregnane-3,20-dione	5-&alpha;-pregnane-3,20-dione [ C21 H32 O2, tgt= ]	(320.24368, 35689.914)(321.24774, 6712.9697)(316.27216, 8503.49)	13.8409
5-&beta;-pregnan-3,20 dione	1	121950	139923	1	1	1	1	1	1	1	1	165122	120836	125960	115800	5-&beta;-pregnan-3,20 dione	5-&beta;-pregnan-3,20 dione [ C21 H32 O2, tgt= ]	(320.24368, 35689.914)(321.24774, 6712.9697)(316.27216, 8503.49)	13.8409
5,10-methylenetetrahydropteroyl tri-L-glutamate	1	1	1	1	1	1	1	1	1	251737	248188	242103	1	1	1	5,10-methylenetetrahydropteroyl tri-L-glutamate	5,10-methylenetetrahydropteroyl tri-L-glutamate [ C30 H33 N9 O12, tgt= ]	(694.216, 12291.19)(695.2182, 1529.43)	7.4228
5',5'''-diadenosine triphosphate	271896	303252	289411	146381	134239	131115	333176	322685	313278	281210	167529	167504	280498	357439	348859	5',5'''-diadenosine triphosphate	5',5'''-diadenosine triphosphate [ C20 H24 N10 O16 P3, tgt=38.46, overall=38.46 ]	(757.06665, 3510.7722)(735.0562, 5537.012)(740.85956, 4549.893)(741.95325, 10281.893)(742.0655, 13568.01)(771.1834, 9185.32)(757.07074, 553.2625)(779.82135, 2469.5342)(764.07227, 3830.6602)	22.0282
5,6-dihydrothymine	218752	252099	227575	1	1	1	1	1	1	1	1	1	1	1	1	5,6-dihydrothymine	5,6-dihydrothymine [ C5 H8 N2 O2, tgt= ]	(130.0598, 2970.13)(146.09038, 7168.27)	2.7945
5,6-epoxy-3-hydroxy-12'-apo-&beta;-caroten-12'-al	1	1	1	7326755	7323624	7319192	1	1	1	3783799	3990227	5438244	1	1	349198	5,6-epoxy-3-hydroxy-12'-apo-&beta;-caroten-12'-al	5,6-epoxy-3-hydroxy-12'-apo-&beta;-caroten-12'-al [ C27 H36 O3, tgt=27.00, overall=27.00 ]	(426.2917, 5167.06)(431.2469, 114460.45)(432.24942, 25833.438)(413.25552, 142173.33)(414.25778, 19776.537)(415.26517, 1676.1998)	6.743
5,6-epoxy-3-hydroxy-9-apo-&beta;-caroten-9-one	1	1	1	654534	616574	600110	1	1	1	903046	995903	1012219	309583	314953	379556	5,6-epoxy-3-hydroxy-9-apo-&beta;-caroten-9-one	5,6-epoxy-3-hydroxy-9-apo-&beta;-caroten-9-one [ C13 H20 O3, tgt=46.66, overall=46.66 ]	(226.14552, 2016.1967)(242.17606, 8100.2656)(248.47, 7898.268)(234.1408, 4656.26)	3.2162
5,8,11,14-eicosatetraynoate	882153	943523	3839539	13510798	13262568	13168458	134992	148419	142062	3264776	3344230	3192771	3458655	3526186	3515673	5,8,11,14-eicosatetraynoate	5,8,11,14-eicosatetraynoate [ C20 H23 O2, tgt=23.36, overall=23.36 ]	(298.5571, 2869.7676)(300.17648, 446.00333)(279.1586, 143124.08)(280.16107, 18984.518)(297.43365, 2330.9624)(278.1718, 10184.546)(316.2085, 10322.379)(297.19724, 10522.104)(319.8361, 69194.64)(320.2631, 10327.931)(304.1608, 4009.6033)	4.2854
5-[[4-methoxy-3-(phenylmethoxy)phenyl]methyl]-2,4-pyrimidinediamine	1024945	1076751	1030309	8619889	8540788	8494063	341047	165403	183133	5175730	5333149	5174544	1160866	814258	692809	5-[[4-methoxy-3-(phenylmethoxy)phenyl]methyl]-2,4-pyrimidinediamine	5-[[4-methoxy-3-(phenylmethoxy)phenyl]methyl]-2,4-pyrimidinediamine [ C19 H20 N4 O2, tgt=20.17, overall=20.17 ]	(340.6824, 638.54834)(322.1699, 221.31667)(356.20154, 2902.6287)(359.21152, 3816.3682)(336.17688, 47180.727)(337.17908, 8906.329)(359.1527, 519.62)	5.1424
5-amino-6-(D-ribitylamino)uracil	1119798	1203350	1166222	1864772	2028737	2029570	1030095	1044022	1000227	2697387	2687676	2666865	414937	399905	454639	5-amino-6-(D-ribitylamino)uracil	5-amino-6-(D-ribitylamino)uracil [ C9 H16 N4 O6, tgt=50.00, overall=50.00 ]	(278.11002, 5601.6694)(280.11636, 6719.31)(258.09897, 24835.719)(259.10217, 392.06998)(279.1249, 12131.073)(280.11783, 6772.7637)(294.81277, 51573.043)(296.1538, 6082.926)(280.1338, 12210.531)	2.8984
5-aminolevulinyl-CoA	1350168	1416205	1424337	1641556	1561204	1550686	1931394	1910616	1873490	1718746	1710083	1565791	1933194	1973750	1938414	5-aminolevulinyl-CoA	5-aminolevulinyl-CoA [ C26 H40 N8 O18 P3 S, tgt=44.85, overall=44.85 ]	(865.14874, 1116.2775)(879.169, 59759.516)(880.1702, 7781.0864)(881.14624, 2343.4668)(901.176, 6536.4204)(879.16327, 60587.91)(880.1647, 7501.462)(881.1428, 1524.635)	23.1464
5-aminopentanoate	1	1	1	1	1	1	27812862	28524112	28479840	1	1	1	1	1	1	5-aminopentanoate	5-aminopentanoate [ C5 H11 N O2, tgt= ]	(118.08096, 360782.84)(119.08407, 9395.76)	2.6322
5-androstene-3,17-dione	1	246287	241876	1	1	1	1	1	1	1	1	1	1	1	1	5-androstene-3,17-dione	5-androstene-3,17-dione [ C19 H26 O2, tgt= ]	(288.19183, 69373.055)(289.1942, 3269.26)(270.18237, 43941.67)(295.18875, 12264.925)	6.3618
5-dehydroavenasterol	1	1	1	1	1	1	1	1	1	961114	989793	986016	1	1	1	5-dehydroavenasterol	5-dehydroavenasterol [ C29 H46 O, tgt= ]	(438.36063, 43994.016)(439.36343, 5620.404)	15.1234
5'-demethoxy-6-methoxypodophyllotoxin 7-glucoside	1	1	1	1	1	1	1	1	1	2832919	2833269	2803188	1	1	1	5'-demethoxy-6-methoxypodophyllotoxin 7-glucoside	5'-demethoxy-6-methoxypodophyllotoxin 7-glucoside [ C28 H32 O13, tgt= ]	(576.22107, 78351.18)(577.22363, 16663.822)(578.2441, 4083.9932)(579.249, 190.17)	11.565
5'-deoxyadenosine	1	1	1	1620624	113221	1681935	436169	443485	427966	110693	1	1	1	1	1	5'-deoxyadenosine	5'-deoxyadenosine [ C10 H13 N5 O3, tgt=47.46, overall=47.46 ]	(252.53346, 11785.593)(234.09769, 240.945)(253.10704, 22920.334)(237.1122, 24896.262)(255.13371, 3839.9539)	2.3494
5-fluorocytosine	1	1	1	333345	316474	324298	328021	316678	335655	335473	270511	1	1	1	1	5-fluorocytosine	5-fluorocytosine [ C4 H4 F N3 O, tgt=47.14, overall=47.14 ]	(130.04398, 874.38)(117.03423, 2401.3684)(153.02603, 11673.259)(138.02097, 8359.658)	2.0954
5-hydroxy-L-tryptophan	1	1	1	1	1	1	306098	315825	316115	1	1	1	1	1	1	5-hydroxy-L-tryptophan	5-hydroxy-L-tryptophan [ C11 H12 N2 O3, tgt= ]	(223.09721, 16497.49)(238.11534, 8894.21)	2.788
5-hydroxymethyluracil	103469	1	109855	167398	131424	128462	1	1	1	115971	106463	103975	1	1	1	5-hydroxymethyluracil	5-hydroxymethyluracil [ C5 H6 N2 O3, tgt=47.33, overall=47.33 ]	(125.032455, 6347.9365)(170.04109, 562.4683)(148.02026, 38020.06)(152.03064, 16925.1)	1.2452
5-isobutylthioribose	1190074	1266358	1225630	228188	236191	241259	670639	684313	789514	300306	302380	292674	714878	731477	686281	5-isobutylthioribose	5-isobutylthioribose [ C9 H18 O4 S, tgt=16.54, overall=16.54 ]	(243.12347, 18169.473)(244.12186, 4830.123)(223.09775, 11211.742)	2.7886
5-methyl-DL-tryptophan	1	1	1	3726449	3389604	1	698547	1	1	1	1	1	1	1	1	5-methyl-DL-tryptophan	5-methyl-DL-tryptophan [ C12 H14 N2 O2, tgt=47.45, overall=47.45 ]	(245.1021, 2007.5933)(205.1086, 1242.84)(218.1029, 319.69998)	2.39607
5-methyl-tetrahydropteroyl-&alpha;-glutamylglutamate	1	1	1	1	1	1	1	1	1	2814668	2784956	2832162	2669079	2677686	2756123	5-methyl-tetrahydropteroyl-&alpha;-glutamylglutamate	5-methyl-tetrahydropteroyl-&alpha;-glutamylglutamate [ C25 H29 N8 O9, tgt= ]	(585.20996, 45850.887)(586.2126, 9893.68)(588.5612, 17908.637)(586.2143, 10249.78)	12.055
5-methylthiopentanonitrile oxide	355957	377436	352721	504116	477929	489794	504513	518310	524257	432036	432244	407891	403190	415685	395140	5-methylthiopentanonitrile oxide	5-methylthiopentanonitrile oxide [ C6 H11 N O S, tgt=62.91, overall=62.91 ]	(168.04353, 24971.963)(169.04465, 1698.5535)(170.04137, 610.2955)(152.03055, 16903.568)	2.0036
5-methylthiopentylhydroximoyl-glutathione	1	1	1	1334743	639680	1	1	1	1	1	1	1	1	1	1	5-methylthiopentylhydroximoyl-glutathione	5-methylthiopentylhydroximoyl-glutathione [ C16 H27 N4 O7 S2, tgt=48.83, overall=48.83 ]	(456.1336, 76413.54)(457.13626, 12367.21)	12.392
5-oxoproline	2623748	2652183	2667486	2890741	2741887	2594255	2755941	2748515	2858685	2499763	2693777	2665433	2493810	2492386	2669879	5-oxoproline	5-oxoproline [ C5 H6 N O3, tgt=32.11, overall=32.11 ]	(130.0444, 264.99)(151.897, 33811.35)(152.89398, 12055.498)(153.02554, 13474.2)(138.02226, 8233.37)	2.013
5-pentadecatrienyl resorcinol	1	1	1	1	1	1	2555363	2541164	2537445	898433	906278	911248	1	1	1	5-pentadecatrienyl resorcinol	5-pentadecatrienyl resorcinol [ C21H30O2, tgt= ]	(315.2391, 5223.555)(297.2296, 22379.074)(298.23227, 1399.7666)(337.22043, 44830.13)(338.2234, 3011.6348)	11.9543
6&alpha;-hydroxy-castasterone	1	1	1	1	1	1008010	1	1	1	506510	100541	102782	125294	126875	131198	6&alpha;-hydroxy-castasterone	6&alpha;-hydroxy-castasterone [ C28 H50 O5, tgt= ]	(490.3442, 854.11)(468.36954, 8176.215)(471.3309, 39919.66)(472.3334, 5110.34)	11.6385
6&alpha;-hydroxy-germacra-1(10),4,11(13)-trien-12-oate	626964	694574	214302	1	1	1	1	1	1	1	1	1	1	1	1	6&alpha;-hydroxy-germacra-1(10),4,11(13)-trien-12-oate	6&alpha;-hydroxy-germacra-1(10),4,11(13)-trien-12-oate [ C15 H21 O3, tgt=40.08, overall=40.08 ]	(249.15002, 7033.3633)(233.14124, 83597.055)(234.14363, 3254.4368)(236.16264, 4889.0767)	2.878
6-&beta;-hydroxylithocholate	842806	1166175	1	1	1	1	1	1	1	1	1	249378	1	1	1	6-&beta;-hydroxylithocholate	6-&beta;-hydroxylithocholate [ C24H39O4, tgt= ]	(373.264, 7232.8)(414.2619, 21168.145)(415.266, 253.2)(401.2697, 69183.58)	3.3086
6,7,4'-trihydroxyflavanone	1	1	1	1	1	1494283	1	1	1	16047517	16141532	15942973	1	1	1	6,7,4'-trihydroxyflavanone	6,7,4'-trihydroxyflavanone [ C15 H12 O5, tgt= ]	(255.0547, 330717.3)(256.05756, 37128.504)(257.0599, 1386.2201)	7.89243
6,7,4'-trihydroxyisoflavone	1	1	1	1	1	1	1	1	1	4107353	4194490	4286045	1	1	1	6,7,4'-trihydroxyisoflavone	6,7,4'-trihydroxyisoflavone [ C15 H10 O5, tgt= ]	(271.04932, 125649.4)(272.05197, 9997.133)(255.05412, 1694.7401)	9.4118
6-aminohexanoate	1142502	1269798	1256763	1	1	1	1	1	1	1	1	1	1	1	1	6-aminohexanoate	6-aminohexanoate [ C6 H13 N O2, tgt=45.17, overall=45.17 ]	(132.09666, 11970.487)(136.0696, 5090.2866)	2.58
6-aminohexanoate linear dimer	1351981	1280251	22696178	88273192	88208904	86696576	65229608	66587616	68142936	42175760	42671748	41277976	39848224	40447380	39025424	6-aminohexanoate linear dimer	6-aminohexanoate linear dimer [ C12 H24 N2 O3, tgt=38.32, overall=38.32 ]	(245.71062, 637718.44)(246.17845, 71669.07)(247.17998, 2052.5627)(227.16667, 34164.87)(228.1696, 1443.025)(270.18045, 19046.342)(271.1822, 365.21286)(249.1503, 5817.53)	3.617
6-decylubiquinone	601265	630383	640933	869003	805589	810589	1	1	1	358090	343409	731033	631525	637336	632031	6-decylubiquinone	6-decylubiquinone [ C19 H30 O4, tgt=43.49, overall=43.49 ]	(345.2014, 10676.6045)(346.216, 1872.3379)(331.5375, 10450.254)(332.20135, 21072.41)	2.4478
6-deoxy-6-sulfo-D-fructose	1	1	1	1	1	1	103664	97089	99263	73654	74661	1	1	1	1	6-deoxy-6-sulfo-D-fructose	6-deoxy-6-sulfo-D-fructose [ C6 H11 O8 S, tgt=40.29, overall=40.29 ]	(249.03491, 1772.884)(266.00568, 7055.486)	1.995
6-deoxyerythronolide B	1	1	1	1	1	1	1	1	1	1	1	1484449	1	1	212012	6-deoxyerythronolide B	6-deoxyerythronolide B [ C21 H38 O6, tgt= ]	(373.26453, 1202.6499)	2.562
6G-di-&beta;-D-fructofuranosylsucrose	4445448	4544488	4374094	1	1	1	1	1	1	1	1	1	1	1	1	6G-di-&beta;-D-fructofuranosylsucrose	6G-di-&beta;-D-fructofuranosylsucrose [ C24 H42 O21, tgt= ]	(667.26715, 108654.96)(668.2696, 26087.703)(669.2715, 1920.0668)	5.6596
6-gingerol	1	1	1	1	1	1	1	1	1	345459	344596	1	1	1	1	6-gingerol	6-gingerol [ C17 H26 O4, tgt= ]	(317.16934, 2733.725)(304.16785, 10323.845)	2.482
6-hydroxy-indole-3-acetyl-valine	1	1	1	1	1	1	1575234	1609520	1553384	1	1	1	1	1	1	6-hydroxy-indole-3-acetyl-valine	6-hydroxy-indole-3-acetyl-valine [ C15 H17 N2 O4, tgt= ]	(316.11435, 31509.873)(317.11722, 1133.46)	4.5808
6-hydroxynicotinate	169069	166286	177694	213495	197203	196549	198192	184367	184130	141639	153597	144130	141141	152091	150535	6-hydroxynicotinate	6-hydroxynicotinate [ C6 H4 N O3, tgt=42.93, overall=42.93 ]	(124.019966, 2555.42)(138.02156, 9909.901)(143.0337, 918.10846)(142.99927, 1215.3014)(140.04967, 4172.952)	2.0164
6-hydroxypseudooxynicotine	1	1	1	316887	326128	328915	1	1	1	1	1	1	1	1	1	6-hydroxypseudooxynicotine	6-hydroxypseudooxynicotine [ C10 H15 N2 O2, tgt=47.48, overall=47.48 ]	(197.11836, 387.52332)(213.14891, 8712.733)	4.781
6-kestotriose	1	1	1	1	1	1	1	1	1	215200	223534	218856	1	1	1	6-kestotriose	6-kestotriose [ C18 H32 O16, tgt= ]	(522.1939, 13239.421)(523.19684, 1247.8467)	8.316
6-methoxy-3-methyl-2-iall-trans/i-octaprenyl-1,4-benzoquinol	2529732	2594184	2564346	2603912	2538484	2460757	2900119	2862020	2840617	2655536	2664660	2650387	2574827	2561922	2531207	6-methoxy-3-methyl-2-iall-trans/i-octaprenyl-1,4-benzoquinol	6-methoxy-3-methyl-2-iall-trans/i-octaprenyl-1,4-benzoquinol [ C48 H74 O3, tgt=45.26, overall=45.26 ]	(698.5439, 3093.66)(725.5534, 6467.4004)(726.55743, 17915.65)(727.5596, 4379.377)(704.5465, 95898.33)(705.5488, 28821.586)	22.5424
6-methoxypodophyllotoxin 7-glucoside	3711106	1	3659846	1	1	1	1	1	1	1	1	1	1	1	1	6-methoxypodophyllotoxin 7-glucoside	6-methoxypodophyllotoxin 7-glucoside [ C29H34O14, tgt= ]	(607.21655, 70050.72)(608.2192, 16205.055)(609.2218, 234.99)	6.8545
6-methyloctanoyl-CoA	1033623	1090095	1096265	1132025	1083464	1106427	1383371	1361716	1355089	1241685	1255168	1236793	1621150	1673876	1656990	6-methyloctanoyl-CoA	6-methyloctanoyl-CoA [ C30 H48 N7 O17 P3 S, tgt=50.98, overall=50.98 ]	(908.1919, 42446.34)(909.1932, 5467.88)(930.19543, 4000.9858)(908.1846, 45792.133)(909.1857, 5922.6665)(910.16547, 1006.6925)	23.2376
6-O-&beta;-D-glucosyl-6-hydroxyflavone	1	1	1	1	1	1	1	1	1	1	1	1	1	544875	547831	6-O-&beta;-D-glucosyl-6-hydroxyflavone	6-O-&beta;-D-glucosyl-6-hydroxyflavone [ C21 H20 O8, tgt= ]	(401.107, 29559.34)(402.10968, 2247.1948)	9.35
6-O-methyl-N-deacetylisoipecoside	814902	1002000	528946	97549	1	101558	714798	717038	657987	782930	817188	798762	2208650	2134898	2177367	6-O-methyl-N-deacetylisoipecoside	6-O-methyl-N-deacetylisoipecoside [ C26 H36 N O11, tgt=42.97, overall=42.97 ]	(538.2308, 4204.376)(521.2166, 62200.188)(522.2195, 11457.399)(521.2406, 1025.13)(558.4638, 2085.956)(539.759, 34375.797)(540.7609, 7253.16)	7.22907
6-O-methyl-N-deacetylisoipecoside aglycon	413966	446628	437748	6426700	6294233	6272418	3473490	3623731	3581504	1784370	1831901	1831083	9388182	9418474	9514932	6-O-methyl-N-deacetylisoipecoside aglycon	6-O-methyl-N-deacetylisoipecoside aglycon [ C20 H26 N O6, tgt=65.86, overall=65.86 ]	(378.18668, 2512.9617)(380.20224, 6880.6304)(360.51352, 26237.863)(361.68396, 2645.0334)(394.21182, 59460.938)(395.2151, 8512.628)(396.20712, 2631.64)(378.20395, 129681.336)(377.21118, 42422.773)(399.16208, 26528.541)(400.16507, 1070.32)	5.8764
6-O-methylnorlaudanosoline	1457916	1561894	635131	1	1	289389	317093	326762	303786	3288340	3243316	3505434	223996	213867	213370	6-O-methylnorlaudanosoline	6-O-methylnorlaudanosoline [ C17 H20 N O4, tgt= ]	(302.70627, 9356.21)(285.5263, 14876.547)(286.129, 149.195)(303.9026, 3347.7798)(287.47644, 5732.473)(321.57156, 13225.239)(323.18054, 11019.776)(304.0662, 11124.988)(305.1664, 879.5967)(329.1363, 11303.166)(310.12573, 382.06998)	3.59247
6-oxocampestanol	1	1	1	1	1	1	1	1	1	344456	355581	376596	1	1	1	6-oxocampestanol	6-oxocampestanol [ C28 H48 O2, tgt= ]	(439.36343, 7760.3867)(421.33408, 4876.0703)	15.22
6-pyruvoyl tetrahydropterin	1	1	1	202558	177143	1	6499588	6688214	6765499	2298967	2315130	2185731	1598576	1606130	1	6-pyruvoyl tetrahydropterin	6-pyruvoyl tetrahydropterin [ C9 H11 N5 O3, tgt=47.13, overall=47.13 ]	(221.08565, 1880.2949)(237.0805, 306.28)(258.13336, 582.518)(237.11311, 50944.47)(238.11594, 2286.7556)	2.796
6subG/sub,6-kestotetraose	4445448	4544488	4374094	1	1	1	1	1	1	1	1	1	1	1	1	6subG/sub,6-kestotetraose	6subG/sub,6-kestotetraose [ C24 H42 O21, tgt= ]	(667.26715, 108654.96)(668.2696, 26087.703)(669.2715, 1920.0668)	5.6596
6subG/sub-kestotriose	1	1	1	1	1	1	1	1	1	215200	223534	218856	1	1	1	6subG/sub-kestotriose	6subG/sub-kestotriose [ C18 H32 O16, tgt= ]	(522.1939, 13239.421)(523.19684, 1247.8467)	8.316
6-tuliposide A	1	1	1	1	1	1	1	1	1	1188556	1236852	1212514	1	1	1	6-tuliposide A	6-tuliposide A [ C11 H18 O8, tgt=62.74, overall=62.74 ]	(296.1351, 53514.03)(297.13733, 830.36005)	7.698
7&beta;-hydroxytaxusin	1213384	1227904	1174558	388116	369858	253411	1456920	1461513	1442939	817570	866525	858882	1035321	1017228	1058492	7&beta;-hydroxytaxusin	7&beta;-hydroxytaxusin [ C28 H40 O9, tgt=47.62, overall=47.62 ]	(505.6399, 4666.093)(505.2662, 662.72003)(507.27036, 3825.6436)(521.2732, 5951.6)(507.10645, 3660.8386)(540.177, 33122.766)(539.80133, 8227.105)(520.2938, 6589.947)(521.3042, 339.99)(544.54254, 18837.068)(545.25665, 6778.473)(546.26886, 1506.1068)(526.05676, 18959.355)(526.2526, 4799.123)	7.098
7,2'-dihydroxy-4'-methoxy-isoflavanol carbocation intermediate 2	1	246287	241876	1	1	1	1	1	1	169990	219222	262122	1	1	1	7,2'-dihydroxy-4'-methoxy-isoflavanol carbocation intermediate 2	7,2'-dihydroxy-4'-methoxy-isoflavanol carbocation intermediate 2 [ C16 H19 O5, tgt= ]	(294.1355, 3492.28)(276.12216, 5672.57)(277.32382, 8042.6235)(295.153, 50007.938)(296.1568, 7662.83)(297.11356, 4433.08)	3.4034
7,3',4',5'-tetramethylmyricetin	1	1	1	1	1	1	1	1	1	1	1	1	755991	670143	759146	7,3',4',5'-tetramethylmyricetin	7,3',4',5'-tetramethylmyricetin [ C19 H18 O8, tgt= ]	(392.14493, 29005.033)(393.14755, 2646.57)	10.7715
7,4'-dihydroxy, 8-methoxyflavone	1	1	1	1	1	1	1	1	1	2859638	2884991	2933708	1	1	1	7,4'-dihydroxy, 8-methoxyflavone	7,4'-dihydroxy, 8-methoxyflavone [ C16 H12 O5, tgt= ]	(285.06412, 101108.93)(286.06693, 8111.5034)	8.3818
7,8,4'-trihydroxyflavone	1	1	1	1	1	1	1	1	1	4107353	4194490	4286045	1	1	1	7,8,4'-trihydroxyflavone	7,8,4'-trihydroxyflavone [ C15 H10 O5, tgt= ]	(271.04932, 125649.4)(272.05197, 9997.133)(255.05412, 1694.7401)	9.4118
7,8-dihydrobiopterin	1	1	1	1	1	1	1	1	1	850239	827829	795140	1	1	1	7,8-dihydrobiopterin	7,8-dihydrobiopterin [ C9 H13 N5 O3, tgt= ]	(244.12213, 846.76337)(257.13333, 19870.92)	3.645
7,8-dihydropteroate	1	1	1	1314699	1295182	1305496	573564	577153	533460	193289	204573	216265	307812	320447	309599	7,8-dihydropteroate	7,8-dihydropteroate [ C14 H14 N6 O3, tgt=23.52, overall=23.52 ]	(316.11505, 13443.277)(317.11722, 1196.8833)(297.11197, 24314.734)(298.11505, 154.015)(334.1599, 65774.89)(335.16232, 5698.487)(314.14417, 12820.402)	4.719
7-deoxyloganin	748244	749351	774072	741158	734563	701377	1	1	1	3443342	3409966	3441527	1	1	1	7-deoxyloganin	7-deoxyloganin [ C17 H26 O9, tgt=60.75, overall=60.75 ]	(357.156, 5698.91)(380.1673, 6497.77)(357.16, 3902.4849)(393.19333, 23892.492)(393.19882, 3801.92)(375.1738, 6783.85)(379.19238, 3634.8333)(397.14566, 762.66504)	6.281
7-hydroxy-4'5'-dimethoxyisoflavone	1	1	1	1	1	1	1492152	1482834	1389209	1	1	1	1	1	1	7-hydroxy-4'5'-dimethoxyisoflavone	7-hydroxy-4'5'-dimethoxyisoflavone [ C17 H14 O5, tgt= ]	(316.11435, 27660.078)(317.11722, 747.5867)	4.6038
7-iO/i-acetylsalutaridinol	354805	401129	394717	552017	543510	554720	1	1	1	1	1	1	1	1	1	7-iO/i-acetylsalutaridinol	7-iO/i-acetylsalutaridinol [ C21 H26 N O5, tgt=49.52, overall=49.52 ]	(373.19028, 12721.75)(374.19125, 3264.1667)(358.6962, 9399.795)(360.1993, 21369.646)(374.70816, 9635.52)(375.21042, 8321.434)	2.5982
7-methylthioheptylhydroximoyl-cysteinylglycine	1	1	1	514976	512922	513066	1	1	1	1	1	1	1	1	1	7-methylthioheptylhydroximoyl-cysteinylglycine	7-methylthioheptylhydroximoyl-cysteinylglycine [ C13 H25 N3 O4 S2, tgt=16.12, overall=16.12 ]	(335.1222, 6525.2065)(352.14798, 21512.96)(353.15088, 903.7134)	5.463
7-methylthioheptylhydroximoyl-glutathione	1	1	1	1	1	1	2041698	2082339	2009724	1	1	1	1	1	1	7-methylthioheptylhydroximoyl-glutathione	7-methylthioheptylhydroximoyl-glutathione [ C18 H31 N4 O7 S2, tgt= ]	(479.17062, 37769.33)(480.17325, 5166.96)	12.122
7-O-&beta;-D-glucosyl-7-hydroxyflavone	1	1	1	1	1	1	1	1	1	1	1	1	1	544875	547831	7-O-&beta;-D-glucosyl-7-hydroxyflavone	7-O-&beta;-D-glucosyl-7-hydroxyflavone [ C21 H20 O8, tgt= ]	(401.107, 29559.34)(402.10968, 2247.1948)	9.35
7''-O-phosphohygromycin B	1	380538	375631	1	1	1	1	1	1	1	1	1	1	1	1	7''-O-phosphohygromycin B	7''-O-phosphohygromycin B [ C20 H39 N3 O16 P, tgt=12.54, overall=12.54 ]	(608.2192, 19350.012)(609.22156, 273.05)	6.214
7sup1/sup-hydroxychlorophyllide ia/i	1	1	1	1	1	1	1	1	1	252121	253363	253798	1	1	1	7sup1/sup-hydroxychlorophyllide ia/i	7sup1/sup-hydroxychlorophyllide ia/i [ C35 H33 Mg N4 O6, tgt= ]	(634.1976, 9022.29)(635.1902, 4113.533)	5.2895
8&beta;-hydroxy-germacra-1(10),4,11(13)-trien-12-oate	626964	694574	214302	1	1	1	1	1	1	1	1	1	1	1	1	8&beta;-hydroxy-germacra-1(10),4,11(13)-trien-12-oate	8&beta;-hydroxy-germacra-1(10),4,11(13)-trien-12-oate [ C15 H21 O3, tgt=40.08, overall=40.08 ]	(249.15002, 7033.3633)(233.14124, 83597.055)(234.14363, 3254.4368)(236.16264, 4889.0767)	2.878
8C-glucosyl-2,5,7-trihydroxyflavanone	1	1	1	1	1	1	269563	1	247039	1	1	1	1	1	1	8C-glucosyl-2,5,7-trihydroxyflavanone	8C-glucosyl-2,5,7-trihydroxyflavanone [ C21 H21 O10, tgt= ]	(437.12494, 379.63)	9.717
8-hydroxyquinoline	355957	377436	352721	504116	477929	489794	504513	518310	524257	432036	432244	407891	403190	415685	395140	8-hydroxyquinoline	8-hydroxyquinoline [ C9 H7 N O, tgt=88.62, overall=88.62 ]	(168.04353, 24971.963)(169.04465, 1698.5535)(170.04137, 610.2955)(151.03026, 152568.56)	2.0036
8-methylthiooctanaldoxime	855725	935215	925723	1176355	1120425	1126116	1406797	1452894	1464850	1032822	1045822	1000491	292798	1378143	1339868	8-methylthiooctanaldoxime	8-methylthiooctanaldoxime [ C9 H19 N O S, tgt=26.99, overall=26.99 ]	(189.1151, 17041.236)(175.11122, 2555.8328)	2.5126
8-methylthiooctanonitrile oxide	1	1520721	1510047	1	466427	476984	1330884	1400622	1385356	808018	815405	840237	1	1	1	8-methylthiooctanonitrile oxide	8-methylthiooctanonitrile oxide [ C9H17NOS, tgt= ]	(187.0994, 13955.303)(189.11484, 11391.823)(192.13065, 1492.96)	2.7446
8-methylthiooctyl glucosinolate	1	1	1	1	1	1	1	1	1	3761559	3707790	3710603	1	1	1	8-methylthiooctyl glucosinolate	8-methylthiooctyl glucosinolate [ C16 H30 N O9 S3, tgt= ]	(495.14584, 117174.77)(496.14844, 25037.893)(497.15054, 682.55)	12.3442
8-methylthiooctyldesulfoglucosinolate	2353496	2519868	2543039	1149869	1125853	1107747	2346537	2367017	2340473	1337600	1331721	1344251	1375380	1407703	1428318	8-methylthiooctyldesulfoglucosinolate	8-methylthiooctyldesulfoglucosinolate [ C16 H31 N O6 S2, tgt=56.48, overall=56.48 ]	(415.19412, 71149.836)(416.1969, 10477.387)(422.15363, 7113.1094)(423.1567, 1958.8583)(408.1397, 242.85)	12.115
8-methylthiooctylhydroximate	1	1	1	1	1	1	194429	210560	179610	1	1	1	1	1	1	8-methylthiooctylhydroximate	8-methylthiooctylhydroximate [ C9 H19 N O S2, tgt= ]	(244.11774, 3448.68)(245.1179, 2593.7935)(221.1176, 7579.7905)	4.7634
8-methylthiooctylhydroximoyl-cysteinylglycine	241997	314024	298397	1	1	1	1	1	1	1	1	1	1	1	1	8-methylthiooctylhydroximoyl-cysteinylglycine	8-methylthiooctylhydroximoyl-cysteinylglycine [ C14 H27 N3 O4 S2, tgt= ]	(365.1774, 7380.9126)(366.1953, 396.18997)	5.77975
8-methylthiooctylhydroximoyl-glutathione	151384	172285	153463	1	1	1	2743729	2742851	2687576	142844	147008	138671	334145	355259	350526	8-methylthiooctylhydroximoyl-glutathione	8-methylthiooctylhydroximoyl-glutathione [ C19 H33 N4 O7 S2, tgt= ]	(494.68518, 19057.451)(494.18826, 8842.601)(479.1731, 1276.7433)(499.1785, 8453.297)	10.7102
8-oxoguanine	355957	377436	352721	1	1	1	1	1	279840	333063	432244	407891	403190	415685	395140	8-oxoguanine	8-oxoguanine [ C5 H5 N5 O2, tgt= ]	(168.0439, 24442.729)(169.04514, 1609.331)	2.0124
9&beta;-pimara-7,15-diene	319766	360653	330787	1	1	1	1	1	1	1	1	1	1	1	1	9&beta;-pimara-7,15-diene	9&beta;-pimara-7,15-diene [ C20 H32, tgt= ]	(295.23553, 21282.799)(296.24646, 684.85333)	13.4055
9&beta;-stemod-13(17)-en-19-al	1	1	1	143126	1	1	1	1	1	1	1	1	1	1	1	9&beta;-stemod-13(17)-en-19-al	9&beta;-stemod-13(17)-en-19-al [ C20 H30 O, tgt=45.81, overall=45.81 ]	(309.2098, 8821.06)(292.2124, 319.25)	9.12
9&beta;-stemod-13(17)-ene	319766	360653	330787	1	1	1	1	1	1	1	1	1	1	1	1	9&beta;-stemod-13(17)-ene	9&beta;-stemod-13(17)-ene [ C20 H32, tgt= ]	(295.23553, 21282.799)(296.24646, 684.85333)	13.4055
9(iR/i)-HPOTE	1	1	1	1	1	1	1	1	1	1	1	1	1	437734	427520	9(iR/i)-HPOTE	9(iR/i)-HPOTE [ C18H29O4, tgt= ]	(332.20404, 10161.09)(318.18945, 16848.39)	4.8952
9(iS/i)-HPOTE	1	1	1	1	3842166	3929914	1	1852725	1830846	3090450	1	3072012	1	437734	427520	9(iS/i)-HPOTE	9(iS/i)-HPOTE [ C18H29O4, tgt= ]	(332.20288, 20762.94)(333.2064, 152.36)(317.94205, 6458.415)	4.3437
9,10-12,13-diepoxyoctadecanoate	1	1	1	2159558	2095579	2063807	7867520	8242557	8303754	1	1	1	2426623	2441842	1	9,10-12,13-diepoxyoctadecanoate	9,10-12,13-diepoxyoctadecanoate [ C18 H31 O4, tgt=17.60, overall=17.60 ]	(295.2136, 1114.3301)(295.23056, 5258.0)(316.20923, 49807.492)(317.21143, 5862.0205)	7.88
9,10-epoxy-10,12Z-octadecadienoate	7174679	7414453	7318749	2500215	2415936	2063807	2329480	2286008	2270406	618581	1	605350	3747465	3644194	3818412	9,10-epoxy-10,12Z-octadecadienoate	9,10-epoxy-10,12Z-octadecadienoate [ C18 H29 O3, tgt=65.39, overall=65.39 ]	(295.2136, 744.37)(277.20508, 12684.405)(279.0937, 4794.89)(295.2306, 4919.54)(278.5476, 231951.31)(279.55063, 27139.814)(279.2193, 59504.49)(280.2232, 5714.38)(294.6627, 91270.93)(295.69968, 11860.707)(296.24652, 64168.305)(297.25037, 9766.179)(316.2098, 11751.653)	13.772
9,10-epoxy-12-cis-octadecenoate	1	15862836	1	4459806	1	5690611	5155897	5295111	5159823	1	1	1	5802391	5738919	1	9,10-epoxy-12-cis-octadecenoate	9,10-epoxy-12-cis-octadecenoate [ C18 H31 O3, tgt=59.33, overall=59.33 ]	(318.72733, 4178.655)(319.2288, 56.62)(279.2197, 32414.385)(280.22275, 9214.97)(295.23303, 6262.265)(296.2439, 437.55)(316.27075, 1044.965)(296.5339, 46534.555)(297.53662, 4630.1313)(298.26138, 2473.24)(299.2657, 287.34)	14.0406
9,10-epoxy-18-hydroxystearate	793089	764799	822664	3722330	3587153	3543908	221073	241488	246270	455659	454012	487573	175269	166360	184097	9,10-epoxy-18-hydroxystearate	9,10-epoxy-18-hydroxystearate [ C18 H33 O4, tgt=43.30, overall=43.30 ]	(295.23178, 3705.1165)(331.27045, 6303.709)(313.86258, 14348.565)(314.26495, 2428.7834)(336.232, 945.06665)(318.22525, 5569.8633)	15.933
9,10-epoxystearate	1	1	3711600	15676750	15432733	15592384	1	1	1	1	1	1	1	1	1	9,10-epoxystearate	9,10-epoxystearate [ C18 H33 O3, tgt=8.13, overall=8.13 ]	(297.24765, 2407.41)(298.2643, 39414.52)(299.2671, 3703.31)(320.2408, 4844.8765)	13.553
9,12,15-cis-hexadecatrienoyl-CoA	311889	350972	338569	171310	160208	163178	344231	419589	477616	412213	421336	424456	764486	802731	813186	9,12,15-cis-hexadecatrienoyl-CoA	9,12,15-cis-hexadecatrienoyl-CoA [ C37 H56 N7 O17 P3 S, tgt=14.51, overall=14.51 ]	(995.24286, 11783.62)(996.24664, 1448.46)(1024.2622, 5178.873)	23.4876
9,15,9'-tri-icis/i-&zeta;-carotene	396960	427008	421958	1	1	1	1	1	1	1	1	1	1	1	1	9,15,9'-tri-icis/i-&zeta;-carotene	9,15,9'-tri-icis/i-&zeta;-carotene [ C40 H60, tgt= ]	(547.49835, 7346.6235)(559.4981, 15961.6455)(560.501, 2705.2832)	15.8428
9,9'-di-icis/i-&zeta;-carotene	396960	427008	421958	1	1	1	1	1	1	1	1	1	1	1	1	9,9'-di-icis/i-&zeta;-carotene	9,9'-di-icis/i-&zeta;-carotene [ C40 H60, tgt= ]	(547.49835, 7346.6235)(559.4981, 15961.6455)(560.501, 2705.2832)	15.8428
9H-purine-2,6,8-triol	2979705	3029619	3020208	2932900	2781962	2630106	2783761	2770158	3158802	2832826	3126021	3073323	2897000	2908071	3065020	9H-purine-2,6,8-triol	9H-purine-2,6,8-triol [ C5 H4 N4 O3, tgt=47.44, overall=47.44 ]	(170.04137, 580.90686)(151.49649, 83630.82)(152.4956, 13921.738)(153.02603, 12446.609)(175.01096, 2894.805)	2.005
9-icis/i-10'-apo-&beta;-carotenal	1	1	1	1	1	1	1	1	1	1	1	2398740	1	1	1	9-icis/i-10'-apo-&beta;-carotenal	9-icis/i-10'-apo-&beta;-carotenal [ C27 H36 O, tgt= ]	(358.2548, 72886.88)(359.2571, 8152.76)	8.969
9'-icis/i-neoxanthin	1	1	1	1	1	1	1395278	1385964	1393240	1	1	1	1110413	1115783	1110582	9'-icis/i-neoxanthin	9'-icis/i-neoxanthin [ C40H56O4, tgt= ]	(602.42145, 60223.89)(603.4242, 11368.238)	11.2642
9-icis/i-violaxanthin	1	1	1	1	1	1	1395278	1385964	1393240	1	1	1	1110413	1115783	1110582	9-icis/i-violaxanthin	9-icis/i-violaxanthin [ C40H56O4, tgt= ]	(602.42145, 60223.89)(603.4242, 11368.238)	11.2642
9-mercaptodethiobiotin	921172	1075646	914938	6920212	6798001	6815931	4337879	4464802	4548422	5528752	5569480	5498633	5475460	5180725	5576013	9-mercaptodethiobiotin	9-mercaptodethiobiotin [ C10 H17 N2 O3 S, tgt=66.30, overall=66.30 ]	(245.1018, 3892.3835)(263.1298, 52828.754)(264.13235, 2160.7578)(247.11877, 2160.471)(249.11491, 2958.9075)(250.12495, 9178.905)	3.6344
9-methylthiononanaldoxime	4839043	5106564	5070735	4657581	4625487	5136380	4684388	4859429	4941376	5807003	5506286	5329085	4307851	4319566	4261187	9-methylthiononanaldoxime	9-methylthiononanaldoxime [ C10 H21 N O S, tgt=47.59, overall=47.59 ]	(203.13042, 64270.152)(204.13313, 1672.0154)(185.1199, 132.19)(188.63503, 216.05334)	2.5472
9-methylthiononanonitrile oxide	1	1	1	180541	1	1	944182	961376	912590	600033	616588	631191	1	1	201161	9-methylthiononanonitrile oxide	9-methylthiononanonitrile oxide [ C10 H19 N O S, tgt=29.23, overall=29.23 ]	(201.11398, 17701.379)(203.87752, 421.78754)(201.1388, 8265.41)(229.10774, 818.5184)	4.8884
9-methylthiononylhydroximate	859746	907652	886626	1918086	1927880	1898230	796935	801543	781614	2815589	2811642	2820815	2067102	2047111	2028489	9-methylthiononylhydroximate	9-methylthiononylhydroximate [ C10 H21 N O S2, tgt=37.66, overall=37.66 ]	(235.10857, 2343.4033)(222.23524, 5783.1133)(237.11322, 39035.434)(238.11594, 2782.4614)(223.09813, 10948.239)(255.24843, 2443.644)(258.09903, 28895.137)	2.6254
9-methylthiononylhydroximoyl-cysteinylglycine	1	1	1	172412	188244	155216	4559652	4638042	4495685	434713	410431	419063	4304856	4281593	4169742	9-methylthiononylhydroximoyl-cysteinylglycine	9-methylthiononylhydroximoyl-cysteinylglycine [ C15 H29 N3 O4 S2, tgt=33.04, overall=33.04 ]	(380.16504, 2401.08)(364.14548, 1100.82)(380.17618, 14790.519)(381.17944, 1007.5733)(367.16275, 2182.0334)(399.69144, 9814.324)(401.6948, 2350.2083)(379.1793, 1864.6301)(405.1605, 636.82996)	3.8108
9-methylthiononylhydroximoyl-glutathione	1018282	1132105	1044890	390601	428161	397926	2251704	2373235	2379722	1	381228	1	546702	550938	546997	9-methylthiononylhydroximoyl-glutathione	9-methylthiononylhydroximoyl-glutathione [ C20 H35 N4 O7 S2, tgt=4.03, overall=4.03 ]	(508.8985, 56131.816)(510.18393, 11159.165)(491.18298, 1037.7433)(493.187, 23467.44)(494.1896, 3148.62)(508.2175, 8146.392)(511.20923, 2787.6936)	7.98046
a 1-acyl-sn-glycero-3-phosphoethanolamine (n-C14:1)	1	1007595	959439	1744848	670724	678726	1	130523	1	756432	800689	796359	2345016	2197400	1876266	a 1-acyl-sn-glycero-3-phosphoethanolamine (n-C14:1)	a 1-acyl-sn-glycero-3-phosphoethanolamine (n-C14:1) [ C19 H38 N O7 P, tgt=20.78, overall=20.78 ]	(407.50208, 8947.677)(408.6046, 4701.7876)(409.2289, 4304.31)(428.25034, 23525.9)(429.2477, 1533.63)(408.23026, 13704.224)(442.56976, 8846.787)(443.28476, 1175.9601)(427.27112, 1156.615)(447.03564, 20321.645)(447.73248, 9641.165)(433.22534, 11187.312)	5.7804
a 1-acyl-sn-glycero-3-phosphoethanolamine (n-C16:1)	1	1	1	11467557	11468472	11472708	1	1	1	1	1	1	1	1	1	a 1-acyl-sn-glycero-3-phosphoethanolamine (n-C16:1)	a 1-acyl-sn-glycero-3-phosphoethanolamine (n-C16:1) [ C21 H42 N O7 P, tgt=46.65, overall=46.65 ]	(474.26028, 585.1434)(456.25925, 197507.73)(457.2609, 34931.215)(458.26627, 3062.3398)	5.2578
a 1-acyl-sn-glycero-3-phosphoethanolamine (n-C18:1)	1	1	1	1	1	1	1	1	1	1	1	1	1	1	1445297	a 1-acyl-sn-glycero-3-phosphoethanolamine (n-C18:1)	a 1-acyl-sn-glycero-3-phosphoethanolamine (n-C18:1) [ C23H46NO7P, tgt= ]	(484.2934, 21579.76)(485.2954, 1629.35)	4.095
a 1-acyl-sn-glycero-3-phosphoglycerol (n-C14:1)	1	1	1	1238321	1249601	1270276	12955511	13027517	13031917	1	1	1	1	1	1	a 1-acyl-sn-glycero-3-phosphoglycerol (n-C14:1)	a 1-acyl-sn-glycero-3-phosphoglycerol (n-C14:1) [ C20 H38 O9 P, tgt=85.24, overall=85.24 ]	(437.21652, 204.14)(459.257, 5087.3184)(473.27225, 1244.4249)(474.25723, 646.93335)(475.27026, 1295.7733)(456.25925, 211358.05)(457.26102, 37529.52)(458.26627, 3570.843)(478.22525, 158773.45)(479.2228, 35691.094)(478.23257, 5136.3633)(463.23053, 1048.265)	4.6248
a 1-acyl-sn-glycero-3-phosphoglycerol (n-C16:1)	1	1	1	317736	1	330215	1	1	1	1	1	1	1	1	1	a 1-acyl-sn-glycero-3-phosphoglycerol (n-C16:1)	a 1-acyl-sn-glycero-3-phosphoglycerol (n-C16:1) [ C22 H42 O9 P, tgt=46.50, overall=46.50 ]	(483.26175, 2732.885)(463.23224, 11750.14)(507.25964, 2309.475)	5.262
a 1-hexadec-9-enoyl-sn-glycerol 3-phosphate	8327916	8548554	1	356061	338779	348487	182193	190486	185499	3062137	3106072	3073208	1663046	1677989	1689383	a 1-hexadec-9-enoyl-sn-glycerol 3-phosphate	a 1-hexadec-9-enoyl-sn-glycerol 3-phosphate [ C19 H35 O7 P, tgt=49.51, overall=49.51 ]	(407.21085, 11806.273)(408.22284, 9168.558)(392.0815, 9663.487)(392.5387, 6775.5234)(393.2076, 43322.688)(407.22144, 48624.277)(408.22095, 5655.7007)(389.2173, 4435.993)(429.2494, 15777.574)(407.2411, 3092.9934)(433.21048, 3428.4363)(434.227, 76.76)	4.1076
a 1-octadec-11-enoyl-sn-glycerol 3-phosphate	415544	471087	496734	4786335	4837729	4829806	16852162	17251262	16811122	3170297	3039954	3039791	3136585	3073386	2990184	a 1-octadec-11-enoyl-sn-glycerol 3-phosphate	a 1-octadec-11-enoyl-sn-glycerol 3-phosphate [ C21 H39 O7 P, tgt=36.91, overall=36.91 ]	(418.39975, 5370.928)(459.99692, 2932.4224)(458.2511, 59.84)(417.24982, 279.27145)(456.275, 11972.054)(435.25092, 27368.371)(436.25388, 3289.6067)(444.22324, 1654.8833)	3.598
a 2-acyl-sn-glycero-3-phosphoethanolamine (n-C14:1)	1	1007595	959439	1744848	670724	678726	647607	130523	634701	756432	800689	796359	2345016	2197400	1876266	a 2-acyl-sn-glycero-3-phosphoethanolamine (n-C14:1)	a 2-acyl-sn-glycero-3-phosphoethanolamine (n-C14:1) [ C19 H38 N O7 P, tgt=20.78, overall=20.78 ]	(407.50208, 8947.677)(408.6046, 4701.7876)(409.2289, 4304.31)(428.49976, 22815.748)(429.2477, 1533.63)(408.23026, 13704.224)(442.94772, 9891.377)(443.7812, 932.77)(427.27112, 1156.615)(447.03564, 20321.645)(447.73248, 9641.165)(431.97638, 11517.415)(429.2179, 7175.39)	5.37733
a 2-acyl-sn-glycero-3-phosphoethanolamine (n-C16:1)	439199	500073	462031	11467557	11468472	11472708	1	1	1	4086509	1	4277237	819219	771123	792036	a 2-acyl-sn-glycero-3-phosphoethanolamine (n-C16:1)	a 2-acyl-sn-glycero-3-phosphoethanolamine (n-C16:1) [ C21 H42 N O7 P, tgt=46.65, overall=46.65 ]	(435.2528, 20531.258)(436.25513, 2010.9033)(470.31442, 25728.727)(471.3175, 2860.9065)(476.54346, 24717.637)(456.50928, 83728.0)(457.39972, 16371.874)(458.51492, 3523.045)(460.2593, 1198.17)	3.86292
a 2-acyl-sn-glycero-3-phosphoethanolamine (n-C18:1)	1	1	1	1	1	1	1	1	1	1	1	1	1	1	1445297	a 2-acyl-sn-glycero-3-phosphoethanolamine (n-C18:1)	a 2-acyl-sn-glycero-3-phosphoethanolamine (n-C18:1) [ C23 H46 N O7 P, tgt=12.26, overall=12.26 ]	(484.2934, 21579.76)(485.2954, 1629.35)	4.095
a 2-acyl-sn-glycero-3-phosphoglycerol (n-C14:1)	1	1	1	1238321	1249601	1270276	12955511	13027517	13031917	253216	260962	267933	296466	280056	296788	a 2-acyl-sn-glycero-3-phosphoglycerol (n-C14:1)	a 2-acyl-sn-glycero-3-phosphoglycerol (n-C14:1) [ C20 H38 O9 P, tgt=85.24, overall=85.24 ]	(457.24622, 22062.559)(458.25006, 170.205)(436.21054, 4248.93)(458.96967, 7582.336)(458.2514, 850.8)(459.258, 889.09)(473.27365, 2740.2554)(474.26273, 1685.0616)(475.27026, 1295.7733)(456.26074, 112976.54)(457.25894, 18887.834)(458.26627, 3570.843)(478.64246, 79857.086)(479.67188, 24000.9)(478.98465, 3940.8025)(460.21436, 3016.3882)	4.1768
a 2-acyl-sn-glycero-3-phosphoglycerol (n-C16:1)	1	1	1	317736	1	330215	1515733	1612846	1480141	724141	729047	707195	1359581	1355306	1347359	a 2-acyl-sn-glycero-3-phosphoglycerol (n-C16:1)	a 2-acyl-sn-glycero-3-phosphoglycerol (n-C16:1) [ C22 H42 O9 P, tgt=46.50, overall=46.50 ]	(483.59116, 5985.5547)(485.59888, 1643.8099)(463.23276, 6623.546)(486.2709, 10857.63)(487.277, 2286.69)(464.75754, 2478.3)(501.29123, 6408.375)(501.287, 143.47)(484.29068, 11392.047)(486.29114, 2341.0718)(505.00018, 11696.034)(505.24844, 1864.0533)(488.2411, 121328.46)(489.24017, 36669.45)(490.2358, 6511.7266)	4.40025
a 2-acyl-sn-glycero-3-phosphoglycerol (n-C18:1)	242867	247710	229134	259120	1227651	280479	1	1	1	915175	249446	282122	1	1	717242	a 2-acyl-sn-glycero-3-phosphoglycerol (n-C18:1)	a 2-acyl-sn-glycero-3-phosphoglycerol (n-C18:1) [ C24 H46 O9 P, tgt=45.52, overall=45.52 ]	(493.28326, 4458.957)(494.78278, 1485.8201)(528.3124, 5016.52)(512.3218, 18355.633)(513.32355, 970.3119)(535.7864, 4998.6826)(533.288, 1942.73)(514.27167, 6583.55)	6.1822
a 4' hydroxyflavanone	1	1	1	1	1	1	1	1	1	1	607746	1866057	1	1	1	a 4' hydroxyflavanone	a 4' hydroxyflavanone [ C15 H12 O3, tgt= ]	(245.1036, 917.87)(263.1316, 53421.04)(244.12, 6505.2803)	2.677
a 4'-methoxyisoflavone	1	1	1	1	1	1	1	1	1	1	1	1	1225860	1203696	1209268	a 4'-methoxyisoflavone	a 4'-methoxyisoflavone [ C16 H12 O3, tgt= ]	(252.08484, 40955.496)(253.08636, 963.79663)	6.6242
a bacteriochlorin	1	1	1	307662	314109	316229	573564	577153	533460	193202	204902	215781	307749	320385	309599	a bacteriochlorin	a bacteriochlorin [ C20 H18 N4, tgt=62.20, overall=62.20 ]	(315.82022, 88304.18)(319.16867, 22785.34)(318.16782, 82949.266)(319.17023, 7967.1245)	4.5406
a biopterin	1	1	1	202558	177143	1	6499588	6688214	6765499	2298967	2315130	2185731	1598576	1606130	1	a biopterin	a biopterin [ C9 H11 N5 O3, tgt=47.13, overall=47.13 ]	(221.08565, 1880.2949)(237.0805, 306.28)(258.13336, 582.518)(237.11311, 50944.47)(238.11594, 2286.7556)	2.796
a bulgecin	1	1	1	1	1	1	715565	714814	685489	1	1	1	1	1	1	a bulgecin	a bulgecin [ C15 H26 N2 O11 S, tgt= ]	(442.11954, 24025.12)(443.12216, 2284.3066)	10.99
a butirosin	1	1	1	376012	1	320265	1572822	1678728	1654596	4386983	4193923	4302136	10355864	10279924	10597932	a butirosin	a butirosin [ C21 H45 N5 O12, tgt=38.96, overall=38.96 ]	(542.29755, 54322.152)(543.2979, 9466.871)(560.32184, 401903.28)(561.3246, 118649.02)(562.32654, 13153.083)(583.3062, 14196.531)(585.3138, 5412.0366)	10.4904
a carvone	1	959772	951568	1	1	1	1	1	1	1	1	1	1	1	1	a carvone	a carvone [ C10 H14 O, tgt= ]	(132.0967, 10475.06)(133.09595, 895.05005)	2.58386
a chlorin	959684	1163899	1097585	603615	593404	602768	5607275	5645813	5537829	2465727	2557170	2520648	3241116	3288329	3205917	a chlorin	a chlorin [ C20 H16 N4, tgt=43.44, overall=43.44 ]	(312.97287, 71716.04)(314.14496, 8701.427)(313.14264, 22048.55)(314.15305, 3216.09)(331.18234, 350.94336)(333.1749, 876.9267)	4.6006
a cinnamoyl-CoA	326732	442687	242592	252111	483091	477230	559881	537064	509125	550521	538394	557958	601908	627921	608184	a cinnamoyl-CoA	a cinnamoyl-CoA [ C30 H38 N7 O17 P3 S, tgt=12.96, overall=12.96 ]	(881.1375, 577.32)(880.397, 335.57)(916.1742, 1137.2)(894.1688, 12128.443)(895.1674, 745.0258)	22.688
a D,L-carnitine	1308457	1406650	1347953	1	1	1	4429074	4525388	4583368	1	1	1082180	1	1	1	a D,L-carnitine	a D,L-carnitine [ C7 H15 N O3, tgt=51.75, overall=51.75 ]	(144.0952, 38215.426)(145.0977, 291.5)(187.09973, 15970.976)(166.0795, 17309.531)	2.733
a farnesoate	2945378	3200988	2835450	1771934	1694349	1715845	1086309	1096274	1116044	2183624	2363202	2878221	2494750	2537288	2548685	a farnesoate	a farnesoate [ C15 H20 O2, tgt=18.93, overall=18.93 ]	(258.67883, 15676.399)(260.1504, 15797.135)(217.14514, 28365.78)(218.14827, 1578.3734)(235.40616, 1583.81)(236.16255, 3846.14)(239.73526, 2034.7441)(232.16411, 23367.041)	2.7638
a flavanone 7-O-[&alpha;-L-rhamnosyl-(1&rarr;2)-&beta;-D-glucoside]	1	1	1	160022	160353	147479	1	1	1	306590	314130	316355	582945	579685	583236	a flavanone 7-O-[&alpha;-L-rhamnosyl-(1&rarr;2)-&beta;-D-glucoside]	a flavanone 7-O-[&alpha;-L-rhamnosyl-(1&rarr;2)-&beta;-D-glucoside] [ C27 H32 O12, tgt=41.07, overall=41.07 ]	(536.1909, 15942.237)(550.2054, 16952.898)(551.19775, 30976.322)(552.19507, 11016.474)(571.2514, 10517.153)(550.2029, 8201.035)	11.26
a flavonol 3-iO/i-galactoside	1	1	1	1	1	1	1	1	1	1	1	1	1	544875	547831	a flavonol 3-iO/i-galactoside	a flavonol 3-iO/i-galactoside [ C21 H20 O8, tgt= ]	(401.107, 29559.34)(402.10968, 2247.1948)	9.35
a glutamate	2623748	2652183	2667486	2890741	2741887	2594255	2755941	2748515	2858685	2499763	2693777	2665433	2493810	2492386	2669879	a glutamate	a glutamate [ C5 H8 N O4, tgt=32.11, overall=32.11 ]	(130.0444, 264.99)(169.0912, 1876.9801)(170.04137, 576.0361)(151.897, 33811.35)(152.89398, 12055.498)(153.02554, 13474.2)	2.013
a hexose 1-phosphate	299186	318449	308998	441246	441748	421648	487713	485010	495431	359290	363455	359198	331691	331445	323138	a hexose 1-phosphate	a hexose 1-phosphate [ C6 H13 O9 P, tgt=13.54, overall=13.54 ]	(264.06622, 4503.716)(265.00504, 28990.889)(266.00616, 5806.993)	1.997
a jasmonoyl-1-aminocyclopropane-1 carboxylate	174639	250507	233938	637462	608059	625982	1	1	1	368850	362655	378352	1	1	1	a jasmonoyl-1-aminocyclopropane-1 carboxylate	a jasmonoyl-1-aminocyclopropane-1 carboxylate [ C16 H23 N O4, tgt=43.13, overall=43.13 ]	(294.16693, 8686.319)(276.15808, 3890.525)(294.1685, 5968.0835)(277.44266, 13834.971)(314.53516, 6784.438)(320.163, 2565.17)(303.151, 350.1067)	3.0018
a jasmonoyl-glutamine	1	1	1	1	1	1	1	372919	1	1	1	1	276130	286150	291788	a jasmonoyl-glutamine	a jasmonoyl-glutamine [ C17H26N2O5, tgt= ]	(342.1952, 1357.08)(341.21408, 36585.484)(342.22153, 7652.42)(361.17923, 6282.2246)	6.40838
a jasmonoyl-leucine	1	1	1	1159159	812987	459610	1	1	1	268780	275418	1	1	1	1	a jasmonoyl-leucine	a jasmonoyl-leucine [ C18 H29 N O4, tgt=50.03, overall=50.03 ]	(330.18683, 5417.3267)(332.20206, 28349.672)	6.36121
a jasmonoyl-phenylalanine	1	790399	721137	375239	1088272	1080338	9844639	9384580	9008552	603933	560238	604862	2181724	2193126	2106854	a jasmonoyl-phenylalanine	a jasmonoyl-phenylalanine [ C21 H27 N O4, tgt=58.66, overall=58.66 ]	(357.50406, 3325.4507)(360.19775, 1595.34)(339.4285, 712.3725)(359.75977, 18283.55)(360.5336, 3434.415)(342.79306, 2329.41)(345.2012, 9137.746)(375.21725, 5013.8867)(359.21594, 8474.97)(380.17618, 12835.102)(381.17944, 955.4733)(365.3936, 16419.684)(366.5216, 6563.605)	4.49567
a jasmonoyl-valine	1	1	1	143126	134036	132320	1	1	1	1	1	1	1	1	1	a jasmonoyl-valine	a jasmonoyl-valine [ C17 H27 N O4, tgt=0.84, overall=0.84 ]	(293.1968, 4105.783)(309.21008, 8593.56)	9.12
a mannan oligosaccharide	4445448	4544488	4374094	1	1	1	1	1	1	1	1	1	1	1	1	a mannan oligosaccharide	a mannan oligosaccharide [ C24 H42 O21, tgt= ]	(667.26715, 108654.96)(668.2696, 26087.703)(669.2715, 1920.0668)	5.6596
a methyl farnesoate	92202344	94428008	92672336	1	1	1	1	1	1	1	1	1	1	1	1	a methyl farnesoate	a methyl farnesoate [ C16 H26 O2, tgt= ]	(250.19057, 941135.3)(251.19316, 65455.94)(252.19534, 622.59503)(233.19215, 4059.8533)	10.6598
a methyl jasmonate	1	1	1	654534	616574	600110	1	1	1	903046	995903	1012219	309583	314953	379556	a methyl jasmonate	a methyl jasmonate [ C13 H20 O3, tgt=46.66, overall=46.66 ]	(226.14552, 2016.1967)(242.17606, 8100.2656)(248.47, 7898.268)(234.1408, 4656.26)	3.2162
a methylhexadecanoic acid	13963022	13997018	14079843	6212046	5944021	6025103	8473370	8668045	8479264	2885066	2867639	1	9454266	9331395	9574911	a methylhexadecanoic acid	a methylhexadecanoic acid [ C17 H34 O2, tgt=17.87, overall=17.87 ]	(256.25266, 68828.66)(257.2553, 5422.321)(271.2701, 17433.846)(256.2547, 114490.8)(257.2577, 10889.21)(280.2524, 2817.5134)	16.9346
a phenolic steroid	20028984	20569658	20287800	1	1	1	866309	18141566	59189012	1	1	1	1	1	1	a phenolic steroid	a phenolic steroid [ C18 H24 O, tgt= ]	(242.18567, 4106.473)(263.1655, 12058.081)(264.1659, 1161.5333)(265.1815, 143210.33)(266.18433, 15654.617)	4.36025
a phycocyanobilin	1	1	1	373199	370552	388003	2570340	2670536	2573851	1	1	1	1032039	1015399	1012635	a phycocyanobilin	a phycocyanobilin [ C33 H36 N4 O6, tgt=52.04, overall=52.04 ]	(566.2561, 18821.15)(567.25055, 5369.277)(573.27966, 149550.16)(603.28754, 1572.32)(604.3034, 12285.47)(605.30615, 1820.8566)(606.3087, 666.4667)(585.79266, 8414.931)(587.29803, 1930.3334)(608.27026, 5890.6167)(609.2663, 1158.39)	6.4335
a phytochromobilin	1	1	1	622286	644783	621595	1	1	1	1	1	1	1	1	1	a phytochromobilin	a phytochromobilin [ C33 H34 N4 O6, tgt=40.42, overall=40.42 ]	(569.2635, 2094.82)(601.2891, 12040.097)(602.29193, 643.72)	3.571
a plastoquinone	157809	161283	158545	1	1	1	1	1	1	1	1	1	1	1	1	a plastoquinone	a plastoquinone [ C53 H80 O2, tgt= ]	(754.57697, 8880.837)(755.58105, 15594.532)(756.5832, 4173.273)	22.56
a porphyrin	1461545	1492079	1444795	1132091	1083431	1064675	1	1	1	1	1	1	1	1	1	a porphyrin	a porphyrin [ C20 H14 N4, tgt=61.26, overall=61.26 ]	(311.1255, 37220.387)(312.12833, 2587.92)(313.1388, 5197.3735)	5.573
a radical of luteolin-7-iO/i-diglucuronide	1	1	1	1	1	1	1	1	1	1	1	1	171167	168803	179184	a radical of luteolin-7-iO/i-diglucuronide	a radical of luteolin-7-iO/i-diglucuronide [ C27 H23 O18, tgt= ]	(618.10114, 940.67334)(653.126, 3125.6067)(639.1197, 1340.3066)	18.3842
a retinol	1	1	1	143126	1	1	1	1	1	1	1	1	1	1	1	a retinol	a retinol [ C20 H30 O, tgt=45.81, overall=45.81 ]	(309.2098, 8821.06)(292.2124, 319.25)	9.12
a rotenoid	1	1	1	1	1	1	1	1	1	1	1	1	1225860	1203696	1209268	a rotenoid	a rotenoid [ C16 H12 O3, tgt= ]	(252.08484, 40955.496)(253.08636, 963.79663)	6.6242
a sphinga-4,8-dienine-18:0-ceramide	34005328	34011340	32882624	10287806	10406619	10873104	22086416	21900248	21364324	4667224	4518556	4686353	20696152	20393290	21890264	a sphinga-4,8-dienine-18:0-ceramide	a sphinga-4,8-dienine-18:0-ceramide [ C36 H69 N O3, tgt=66.90, overall=66.90 ]	(563.5268, 197018.06)(564.5296, 63252.402)(565.5319, 6754.557)(551.5267, 3944.2847)	16.6386
a sphinganine	53720996	53525280	61119712	22783388	22984096	22998064	38071856	38387916	37413656	1	1	1	37512352	37452472	37844836	a sphinganine	a sphinganine [ C18 H40 N O2, tgt=63.22, overall=63.22 ]	(310.2976, 86176.93)(311.3004, 11515.0625)	17.6103
a tetradecenoate(n-C14:1)	1	1	7604037	1	1	1	1	1	1	1	1	1	1	1	1	a tetradecenoate(n-C14:1)	a tetradecenoate(n-C14:1) [ C14 H25 O2, tgt=47.43, overall=47.43 ]	(248.1749, 103534.43)(231.1652, 152.55)	4.296
a tetradecenoyl-CoA (n-C14:1CoA)	1	1	1	1	1	1	1	1	1	1	1	1	353459	371841	372364	a tetradecenoyl-CoA (n-C14:1CoA)	a tetradecenoyl-CoA (n-C14:1CoA) [ C35 H56 N7 O17 P3 S, tgt=13.41, overall=13.41 ]	(995.2452, 16651.75)(996.24664, 1403.1)	23.479
a thiopurine	1	1	1	1	1	1	1	1	1	1	84349	241138	83466	88905	1	a thiopurine	a thiopurine [ C5H4N4S, tgt= ]	(154.00722, 1988.7524)(153.02718, 13231.985)	2.69417
a vaccenate	215010224	255907440	1	120543232	120944848	120876248	166628576	167584464	165638384	59428980	57757856	57973104	184009824	183608944	188123344	a vaccenate	a vaccenate [ C18 H33 O2, tgt=38.66, overall=38.66 ]	(281.25458, 436.43503)(265.24155, 61293.82)(266.24435, 7195.0625)(268.25186, 1658.2899)(282.26785, 2494932.0)(283.27115, 472294.84)(284.2747, 36927.24)(285.28674, 1772.51)(286.2897, 93.27)	16.6468
a1-tetradec-7-enoyl-sn-glycerol 3-phosphate	1	1	1	4696942	1	4525169	4468074	4538171	4546287	7761230	7995031	1213288	2382283	2386809	2387161	a1-tetradec-7-enoyl-sn-glycerol 3-phosphate	a1-tetradec-7-enoyl-sn-glycerol 3-phosphate [ C17 H31 O7 P, tgt=14.93, overall=14.93 ]	(360.67917, 19646.264)(361.17874, 5154.447)(405.18265, 1270.19)(366.1962, 6883.46)(380.2009, 5362.634)	5.75207
abieta-7,13-diene	319766	360653	330787	1	1	1	1	1	1	1	1	1	1	1	1	abieta-7,13-diene	abieta-7,13-diene [ C20 H32, tgt= ]	(295.23553, 21282.799)(296.24646, 684.85333)	13.4055
abieta-7,13-diene-18-al	1	1	1	143126	1	1	1	1	1	1	1	1	1	1	1	abieta-7,13-diene-18-al	abieta-7,13-diene-18-al [ C20 H30 O, tgt=45.81, overall=45.81 ]	(309.2098, 8821.06)(292.2124, 319.25)	9.12
acenaphthenequinone	88085	92616	93788	1	1	1	1	1	1	1	1	1	1	1	1	acenaphthenequinone	acenaphthenequinone [ C12 H6 O2, tgt=59.19, overall=59.19 ]	(183.04366, 6306.937)(168.04439, 23476.502)(169.0456, 1753.0801)	2.092
acetoacetate	126234	130866	136447	135439	125597	127770	136667	134155	227743	131302	123314	120662	123138	129936	123943	acetoacetate	acetoacetate [ C4 H5 O3, tgt=18.64, overall=18.64 ]	(101.02159, 7525.1147)(102.01768, 6374.6016)(127.01884, 55787.168)	2.0132
acetoacetyl-CoA	930722	646865	906003	963076	923417	896223	1055102	1026941	1040527	1006945	1000132	1011466	1108140	724949	1094063	acetoacetyl-CoA	acetoacetyl-CoA [ C25 H36 N7 O18 P3 S, tgt=36.08, overall=36.08 ]	(829.11786, 4035.4368)(836.12976, 18900.613)(865.1495, 12683.05)(866.1481, 1243.8247)(850.2779, 18545.627)(851.142, 4222.269)(852.1226, 975.477)	22.5674
acetyl-CoA	935082	988708	883580	979145	963558	937877	1148897	1116598	1111102	1025116	1037144	1029423	1	1147533	1	acetyl-CoA	acetyl-CoA [ C23 H34 N7 O17 P3 S, tgt=47.23, overall=47.23 ]	(793.0946, 2981.9312)(829.12195, 5376.372)(807.1109, 41664.652)(808.1096, 5653.119)	22.3392
aclacinomycin A	1	1	1	1	1	1	1	1	1	1	1	102355	1	1	1	aclacinomycin A	aclacinomycin A [ C42 H54 N O15, tgt= ]	(812.3937, 5989.95)(813.3957, 318.43)	6.29593
aclacinomycin T	1	566585	555721	1	1	1	252923	585191	536800	2361391	2370031	2347289	1	1	1	aclacinomycin T	aclacinomycin T [ C30 H36 N O10, tgt=34.40, overall=34.40 ]	(554.9058, 3404.7634)(556.23926, 194.25499)(573.2797, 164859.86)(574.282, 39023.07)(575.28033, 7228.52)(576.2859, 8259.713)(595.2225, 1213.7999)(576.22107, 74708.9)(577.22363, 15732.577)	8.59383
acryloyl-CoA	1279851	1354804	1183161	1212118	1180093	1146388	368095	1312489	962926	1262885	1365477	901108	1427549	1451513	1435463	acryloyl-CoA	acryloyl-CoA [ C24 H34 N7 O17 P3 S, tgt=29.17, overall=29.17 ]	(800.1026, 4157.862)(822.114, 2265.81)(836.1302, 18369.586)(837.39575, 2004.8501)(840.30585, 305.11273)(841.1343, 467.04)(821.12555, 31668.781)(822.1225, 5582.722)(823.102, 1522.691)(821.1293, 41222.44)(822.12683, 6463.39)(823.107, 2442.8567)	22.4888
adenosine	2726968	2915079	2893056	4108518	4053013	4009113	10898675	11301575	11424758	5810263	5781298	5733465	2463385	2478716	2411176	adenosine	adenosine [ C10 H13 N5 O4, tgt=62.53, overall=62.53 ]	(269.1004, 1176.9546)(251.09514, 1001.35333)(251.094, 498.57666)(253.10667, 15317.574)(285.43436, 16395.562)(286.12936, 1925.1232)(267.1225, 51909.055)(268.12332, 4355.6846)	2.8406
adenosine 5'-carboxamide	288976	330228	319374	277045	272220	274830	397953	409758	398254	447156	456029	1	5953103	5941673	6015029	adenosine 5'-carboxamide	adenosine 5'-carboxamide [ C10 H12 N6 O4, tgt=46.63, overall=46.63 ]	(281.10126, 1098.575)(303.13235, 9645.969)(280.1154, 58596.758)(281.11038, 7017.33)	4.4038
adenosine tetraphosphate	118108	123566	118528	1	1	1	254390	246974	270906	175416	147701	1	236623	229485	241362	adenosine tetraphosphate	adenosine tetraphosphate [ C10 H13 N5 O16 P4, tgt= ]	(565.9382, 5707.8535)(565.9415, 7584.2246)(603.9756, 36416.082)(604.97614, 1403.8837)	21.3764
adhyperforin	1	1	1	681963	640303	626021	609702	998612	875834	147579	147142	149853	1816926	1731267	1819049	adhyperforin	adhyperforin [ C36 H53 O4, tgt=26.95, overall=26.95 ]	(549.39105, 22007.719)(550.3932, 2016.1055)(556.4178, 16090.218)(578.40625, 237.49333)	14.906
adonirubin	2324735	2333363	2330113	1088176	1064322	1051906	3952497	4001115	3972144	2019299	2005633	1981009	7051095	7151774	7037262	adonirubin	adonirubin [ C40 H52 O3, tgt=52.08, overall=52.08 ]	(581.401, 2923.247)(598.4273, 114416.4)(599.42993, 27037.113)(600.4338, 3332.0488)(603.3823, 4849.4224)(604.3866, 249.71)	12.4924
adonixanthin	396906	406421	401952	109275	101455	106768	697315	685771	681935	431651	428741	269493	1091185	1112782	1125081	adonixanthin	adonixanthin [ C40 H54 O3, tgt=11.83, overall=11.83 ]	(584.4116, 28558.363)(585.41547, 6097.426)(570.4321, 1277.45)(584.40796, 6671.8335)(570.4327, 1204.83)(600.4419, 13433.176)(601.4446, 251.405)	12.3129
ADT	1	1	1	1	311233	307877	1	1	1	1	1	1	1	1	1	ADT	ADT [ C4 H9 N2 S, tgt=12.02, overall=12.02 ]	(117.05145, 1212.335)(118.05915, 9087.21)	4.35909
afrormosin	1	1	1	1	1	1	1492152	1482834	1389209	1	1	1	1	1	1	afrormosin	afrormosin [ C17 H14 O5, tgt= ]	(316.11435, 27660.078)(317.11722, 747.5867)	4.6038
afrormosin-7-O-glucoside	1	1	1	1	1	1	715565	714814	685489	1	1	1	1	1	1	afrormosin-7-O-glucoside	afrormosin-7-O-glucoside [ C23 H24 O10, tgt= ]	(442.11954, 24025.12)(443.12216, 2284.3066)(479.1707, 20830.29)(480.17334, 3121.1497)	12.168
agaropentaose	1	1	1	1	1	1	1	1	1	1	1	1	327525	325059	302832	agaropentaose	agaropentaose [ C30 H48 O24, tgt= ]	(817.24054, 995.1233)(798.2288, 4518.6997)	19.825
ajmaline	1798133	3695203	3526674	5381399	5579145	5343679	10394730	10667323	10677328	2066003	2854269	4887224	898931	934417	1964260	ajmaline	ajmaline [ C20 H27 N2 O2, tgt=38.48, overall=38.48 ]	(327.60107, 1834.2279)(330.22217, 13818.375)(331.2225, 987.525)(309.68427, 2492.935)(328.8795, 7237.8335)(330.2222, 10035.58)(331.2246, 559.56)(344.5065, 64588.547)(345.24158, 9981.589)(346.23938, 134.925)(330.2249, 5862.95)(350.1916, 14371.182)(351.19638, 5170.513)	4.53907
alanopine	88085	92616	93788	1	1	1	1	1	1	1	1	1	1	1	1	alanopine	alanopine [ C6 H10 N O4, tgt=55.33, overall=55.33 ]	(168.04439, 23476.502)(169.0456, 1753.0801)	2.092
albendazole s-oxide	1	1	1	1	1	1	1	1	1	1	1	1	326758	333919	331233	albendazole s-oxide	albendazole s-oxide [ C12 H15 N3 O3 S, tgt= ]	(263.071, 7833.453)(281.11038, 7713.1797)	9.27767
allantoate	1	1	1	1	1	1	1	228799	250098	1	1	1	1	1	1	allantoate	allantoate [ C4 H7 N4 O4, tgt= ]	(203.04375, 1052.585)(159.04254, 516.85)	2.295
all-itrans/i-geranyl-geranyl monophosphate	3868788	3986385	1	552017	543510	554720	1520329	1647265	1528546	231679	243416	235253	320283	323229	406437	all-itrans/i-geranyl-geranyl monophosphate	all-itrans/i-geranyl-geranyl monophosphate [ C20 H33 O4 P, tgt=73.23, overall=73.23 ]	(372.89148, 1848.2968)(350.1924, 26468.871)(351.1962, 7021.75)(373.2263, 14986.336)(387.25195, 19894.107)(393.40073, 6460.6133)(394.21008, 5694.9165)(375.27524, 13851.826)(376.60828, 8740.529)	4.4352
all-itrans/i-heptaprenyl diphosphate	233647	276012	235916	1	1	1	124753	133527	122151	1129806	1108677	1596807	1	1	1	all-itrans/i-heptaprenyl diphosphate	all-itrans/i-heptaprenyl diphosphate [ C35 H57 O7 P2, tgt=45.73, overall=45.73 ]	(653.366, 2184.1868)(656.36743, 8169.3267)(640.3714, 6091.857)(669.3725, 60846.21)(670.3742, 16228.59)(671.373, 1994.71)(674.743, 25549.105)(676.344, 12312.475)	6.40425
all-itrans/i-nonaprenyl diphosphate	1	1	1	1	1	1	1	1	1	207832	210718	212053	1	1	1	all-itrans/i-nonaprenyl diphosphate	all-itrans/i-nonaprenyl diphosphate [ C45 H73 O7 P2, tgt= ]	(811.4556, 12704.017)(812.4578, 2901.0134)	7.3638
all-itrans/i-octaprenyl diphosphate	1	1	1	301003	301787	312233	1	1	1	2601500	2362444	2369185	1	1	1	all-itrans/i-octaprenyl diphosphate	all-itrans/i-octaprenyl diphosphate [ C40 H65 O7 P2, tgt=47.49, overall=47.49 ]	(725.4228, 4352.567)(738.4412, 54870.76)(739.44305, 16825.383)(740.44775, 3316.1965)(742.41113, 824.38336)	8.132
allocryptopine	1	1	1	514976	512922	513066	1478142	1495365	1460171	1	1	1	755991	670143	759146	allocryptopine	allocryptopine [ C21 H23 N O5, tgt=47.75, overall=47.75 ]	(352.14798, 21512.96)(353.15088, 903.7134)(392.14493, 29005.033)(393.14755, 2646.57)(374.17496, 1343.4233)	6.43575
aloesone	1	1	1	1	1	1	1	1	1	1	1	15942973	1	1	1	aloesone	aloesone [ C13 H12 O4, tgt= ]	(255.0556, 414680.1)(256.0584, 47618.7)(257.0604, 1191.22)	7.9488
aminoethoxyvinylglycine	546168	547563	1	1	1	1	1	1	1	1	1	1	1	1	1	aminoethoxyvinylglycine	aminoethoxyvinylglycine [ C6 H13 N2 O3, tgt= ]	(164.10005, 750.70496)	2.8045
ancymidol	1	1	1	370795	354066	357855	498234	504355	495693	850239	827829	795140	1	1	1	ancymidol	ancymidol [ C15 H16 N2 O2, tgt=43.03, overall=43.03 ]	(261.13278, 10967.164)(240.61876, 5962.33)(257.13333, 19870.92)(243.12297, 16863.805)(276.15344, 7840.1763)(260.14847, 23125.57)(280.11627, 8266.02)(283.11493, 5470.547)(262.10706, 1900.0566)	3.0366
androst-4-ene-3,17-dione	1	246287	241876	1	1	1	1	1	1	1	1	1	1	1	1	androst-4-ene-3,17-dione	androst-4-ene-3,17-dione [ C19 H26 O2, tgt= ]	(288.19183, 69373.055)(289.1942, 3269.26)(270.18237, 43941.67)(295.18875, 12264.925)	6.3618
antheraxanthin	1	1	1	1477596	1402424	1376639	1	1	1	104500	107781	174400	1	1	1	antheraxanthin	antheraxanthin [ C40 H56 O3, tgt=13.88, overall=13.88 ]	(589.4575, 6059.245)(603.47064, 31785.941)(604.4721, 6030.067)(589.12775, 6061.3237)(589.4704, 411.54)	21.3936
anthranilate	771970	847204	794172	1	1	1	1	1	1	1	1	1	1	1	1	anthranilate	anthranilate [ C7 H6 N O2, tgt= ]	(137.0403, 2385.8267)(138.04926, 2579.1233)	2.6076
anthraniloyl-CoA	1	1	1	493265	178712	456194	197821	515793	192279	503069	1	357992	1	1	412576	anthraniloyl-CoA	anthraniloyl-CoA [ C28 H37 N8 O17 P3 S, tgt=30.67, overall=30.67 ]	(887.1574, 1841.4685)(866.14435, 2556.51)(901.1776, 5452.99)(887.1585, 1831.921)	22.788
apigenin-7,4'-dimethyl ether	1	1	1	1	1	1	1492152	1482834	1389209	1	1	1	1	1	1	apigenin-7,4'-dimethyl ether	apigenin-7,4'-dimethyl ether [ C17 H14 O5, tgt= ]	(316.11435, 27660.078)(317.11722, 747.5867)	4.6038
apigeninidin	1	1	1	1	1	1494283	1	1	1	16047517	16141532	15942973	1	1	1	apigeninidin	apigeninidin [ C15 H10 O4, tgt= ]	(255.0547, 330717.3)(256.05756, 37128.504)(257.0599, 1386.2201)	7.89243
arachidate	859842	890286	925803	1	1	1	294104	305006	264247	1	1	1	1	1	1	arachidate	arachidate [ C20 H39 O2, tgt=22.68, overall=22.68 ]	(311.301, 22885.352)(298.298, 2810.1848)(298.29932, 4868.4766)	17.808
arachidonate	1	1	1	1470839	1455199	1432913	363756	1	355705	1	1	1	1	1	1	arachidonate	arachidonate [ C20 H31 O2, tgt=34.31, overall=34.31 ]	(308.20776, 52493.49)(309.21042, 4378.3896)	7.88136
astaxanthin	1	1	1	909567	2314255	2295881	388858	395791	390019	396381	934311	1	649787	623781	650245	astaxanthin	astaxanthin [ C40 H52 O4, tgt=21.85, overall=21.85 ]	(614.4207, 20473.492)(615.4246, 6916.7603)(598.42584, 59439.266)(599.42847, 12555.637)(602.8716, 33858.156)(603.3644, 15112.439)	12.473
atropine	4791494	5003424	4842924	1470839	1455199	1432913	363756	350594	355705	4195526	4252132	4130768	8417966	8490219	8278939	atropine	atropine [ C17 H24 N O3, tgt=56.01, overall=56.01 ]	(295.1883, 11296.6)(273.31366, 591.7914)(293.99356, 7373.628)(274.17535, 813.464)(308.20786, 47345.87)(309.21042, 4378.3896)(294.713, 12095.571)(316.17523, 530.412)(317.16956, 778.3333)(318.1879, 2838.24)(295.15344, 68786.875)(296.15573, 5327.642)	5.4112
aurachin C	1	182164	187701	1	1	1	1	1	1	1	1	1	1	1	1	aurachin C	aurachin C [ C25 H33 N O2, tgt= ]	(402.22998, 8897.91)(385.22876, 800.71497)	2.40957
aurachin C epoxide	5690428	5940268	14082165	1	1	1	450909	469492	444609	351404	314856	499276	4761600	4714664	4853887	aurachin C epoxide	aurachin C epoxide [ C25 H33 N O3, tgt= ]	(377.22876, 5214.197)(401.26648, 19590.764)(383.261, 3971.343)(415.2743, 3878.17)(420.23352, 39223.844)(419.22696, 2512.4834)(400.62003, 8377.124)(403.23438, 772.695)	3.9356
aureusidin	1	1	1	1	1	1	1	1	1	2859638	2884991	2933708	1	1	1	aureusidin	aureusidin [ C15 H9 O6, tgt= ]	(285.06412, 101108.93)(286.06693, 8111.5034)	8.37675
avenastenone	1	1	1	1	1	1	1	1	1	961114	989793	986016	1	1	1	avenastenone	avenastenone [ C29 H46 O, tgt= ]	(438.36063, 43994.016)(439.36343, 5620.404)	15.1234
azaguanine	1	1	1	1	1	1	327851	342109	328745	1	1	1	1	1	1	azaguanine	azaguanine [ C4 H4 N6 O, tgt= ]	(175.03743, 15388.863)(161.0223, 38649.855)(162.02364, 1324.14)	2.296
azelate	1409901	1520721	1510047	561715	568773	585838	1	1	1	917327	872232	860833	1	1	1	azelate	azelate [ C9 H14 O4, tgt=37.75, overall=37.75 ]	(187.09946, 14075.922)(204.12573, 4080.8533)(189.1155, 10725.22)	3.17925
azetidine-2-carboxylate	1	1	1	161672	152419	143344	1	1	1	144828	143095	141799	128007	127627	131011	azetidine-2-carboxylate	azetidine-2-carboxylate [ C4 H7 N O2, tgt=5.77, overall=5.77 ]	(124.03635, 8209.902)(125.03244, 6188.123)	2.015
baccatin III	1	1	1	1115460	1158164	1133819	325072	332808	295130	1	1	1	1	1	1	baccatin III	baccatin III [ C31 H38 O11, tgt=45.02, overall=45.02 ]	(604.2687, 10965.453)(605.2712, 1227.9299)(590.29, 278617.3)(591.2924, 79930.76)(592.29425, 10094.681)	6.25138
barbaloin	1	1	1	1	1	1	1	1	1	659182	663652	676162	1	1	1	barbaloin	barbaloin [ C21 H22 O9, tgt= ]	(441.11182, 23765.977)(442.1094, 2546.1733)	9.803
benzoyl-CoA	335779	297330	1	2071224	1977421	1955252	2361238	2318751	2276913	2095844	2110859	2084511	108314	114357	117066	benzoyl-CoA	benzoyl-CoA [ C28 H36 N7 O17 P3 S, tgt=8.05, overall=8.05 ]	(852.12146, 2807.6199)(853.1266, 660.07)(887.15906, 1334.068)(869.1106, 6443.26)(871.35974, 8390.14)(872.1604, 3359.34)	22.045
benzyl-6-hydroxy-2-cyclohexene-on-oyl	1	1	1	299282	299724	308633	1	1	1	1	1	1	1	1	1	benzyl-6-hydroxy-2-cyclohexene-on-oyl	benzyl-6-hydroxy-2-cyclohexene-on-oyl [ C14 H14 O4, tgt=44.85, overall=44.85 ]	(247.11858, 4127.6636)(249.11383, 3666.3801)(250.12395, 3134.75)	2.962
benzyladenine	648336	691852	666067	1	1	1	1	1	1	1	1	1	1589392	1589698	1607087	benzyladenine	benzyladenine [ C12 H11 N5, tgt= ]	(246.13603, 32313.547)(253.10878, 10275.425)	3.2762
benzyladenine-7-iN/i-glucoside	1	1	1	384626	391588	386552	1	1	1	1	1	1	1	1	1	benzyladenine-7-iN/i-glucoside	benzyladenine-7-iN/i-glucoside [ C18 H21 N5 O5, tgt=19.08, overall=19.08 ]	(405.1925, 9248.684)(391.5178, 2204.0833)(392.19733, 6312.01)	3.801
benzyladenine-9-iN/i-glucoside	1	1	1	384626	391588	386552	170950	176725	172833	383406	404218	387672	1	670143	1	benzyladenine-9-iN/i-glucoside	benzyladenine-9-iN/i-glucoside [ C18 H21 N5 O5, tgt=19.08, overall=19.08 ]	(370.1509, 8856.977)(405.19394, 12672.794)(390.629, 7292.778)(392.19733, 6312.01)(392.1446, 27016.04)(393.1472, 2421.39)	5.545
berbamunine	1	1	1	1	1	1	1	1	1	679438	708954	693512	1	1	1	berbamunine	berbamunine [ C36H42N2O6, tgt= ]	(603.32306, 513.75)(604.3064, 632.69)(599.3475, 2190.3235)(603.3241, 816.69)(621.2868, 16823.596)(622.28644, 3041.7666)	6.0108
bestatin	1002956	1053349	992779	3364943	3339537	3325020	5676706	5718713	5600311	2465721	2557175	2520892	3241116	3288329	3205917	bestatin	bestatin [ C16 H24 N2 O4, tgt=47.35, overall=47.35 ]	(311.18945, 5422.487)(330.22256, 868.75665)(336.17688, 55167.73)(317.2969, 99569.695)(316.83035, 6552.7134)	5.0464
betulinate	1	1	1	1	1	1	1	1	1	1	1	1	690296	653049	676649	betulinate	betulinate [ C30H48O3, tgt= ]	(462.33435, 29191.82)(463.33646, 804.31006)	14.1893
bilirubin	1	1	1	622286	644783	621595	82452	94846	1	281799	305391	305561	748708	732206	734932	bilirubin	bilirubin [ C33 H34 N4 O6, tgt=40.42, overall=40.42 ]	(582.2634, 3597.28)(566.74786, 9033.423)(565.23444, 1997.6034)(566.2478, 28286.717)(567.25055, 4741.1865)(601.2891, 12040.097)(602.29193, 643.72)(584.533, 3060.0273)(610.2578, 3513.06)	5.987
biliverdin-IX-&alpha;	1	1	1	1	1	1	1	1	1	1407334	1392478	1416081	1334540	1338843	1378062	biliverdin-IX-&alpha;	biliverdin-IX-&alpha; [ C33 H32 N4 O6, tgt= ]	(585.21027, 46079.363)(586.2129, 9953.03)	12.055
bis(&beta;-D-glucosyl) crocetin	1	1	1	108149	1	1	385801	391773	360942	299858	304333	316804	1	1	1	bis(&beta;-D-glucosyl) crocetin	bis(&beta;-D-glucosyl) crocetin [ C32 H44 O14, tgt=17.59, overall=17.59 ]	(656.2749, 37668.48)(657.2772, 6273.41)(635.26996, 15172.786)(636.2725, 3002.99)(676.2715, 12620.653)(677.27124, 2222.1965)	5.55013
bisdemalonylsalvianin	1	128752	123374	1	1	1	349529	356567	336371	1	1	1	623084	616657	609382	bisdemalonylsalvianin	bisdemalonylsalvianin [ C36 H36 O18, tgt= ]	(740.19305, 5534.1396)(784.2132, 1058.19)(740.1895, 7927.8086)(759.20105, 3989.8499)(760.2039, 1504.9733)(774.92444, 1858.2415)(759.20483, 1799.52)	19.4188
bisdemethoxycurcumin	1	1	1	1	1	1	1	1	1	701597	662610	666178	1	1	1	bisdemethoxycurcumin	bisdemethoxycurcumin [ C19 H16 O4, tgt= ]	(311.12537, 7743.3267)(313.14026, 1175.7301)	5.614
bixin	5291718	5573333	5397873	4245109	4173637	4174377	1	4452236	3617479	2593590	2623423	3877958	463983	476323	428662	bixin	bixin [ C25 H29 O4, tgt=63.01, overall=63.01 ]	(393.41855, 55171.785)(394.71024, 14128.005)(396.20712, 2597.6467)(376.1986, 4894.8765)(380.2005, 58609.35)(396.09592, 16505.55)(395.21774, 1674.22)(376.2068, 1449.23)(414.37695, 2209.4363)(417.24976, 78.32)(416.208, 37.94)(402.6312, 1034.0842)	5.378
bixin aldehyde	783535	1	830228	1691041	1585998	1560297	1257315	1494621	1445246	592172	595410	598842	1480483	1486678	1732823	bixin aldehyde	bixin aldehyde [ C24 H28 O2, tgt=55.80, overall=55.80 ]	(348.20557, 5527.0)(331.56174, 8421.483)(349.21674, 37623.953)(332.20297, 19355.264)(348.2219, 58864.8)(349.2166, 2733.15)(373.2796, 29853.172)(374.8096, 1972.4951)(356.5331, 2008.4302)	3.96647
bixin dimethyl ester	379949	1	410514	3254317	3419274	3419961	2504422	2568562	2465728	7302525	7649089	7292409	1	672032	665943	bixin dimethyl ester	bixin dimethyl ester [ C26 H32 O4, tgt=52.16, overall=52.16 ]	(408.2296, 30604.008)(409.2322, 4324.586)(413.25415, 940.245)(391.2338, 24520.496)(428.27832, 7551.7563)(428.27448, 98.02)(413.25653, 2331.4539)(432.42505, 9201.471)(434.37433, 2161.7886)(435.2411, 2441.415)(416.8839, 14882.706)(418.01562, 1326.5281)	6.63153
brassinolide	2097038	2121953	2154879	707251	1	685342	3920818	3894773	3893201	1503332	1520079	1506298	4731084	4769502	4712084	brassinolide	brassinolide [ C28 H48 O6, tgt=23.13, overall=23.13 ]	(482.34863, 122804.26)(483.3514, 21387.824)(484.35403, 2433.5784)	11.2098
brassinolide-23-O-glucoside	1	1	1	1	1	1	1466974	1	1	1	160494	172709	1	1	1	brassinolide-23-O-glucoside	brassinolide-23-O-glucoside [ C34 H58 O11, tgt= ]	(643.73553, 4647.74)(662.43896, 550.47)(644.4277, 2614.08)	11.6113
butanoyl-CoA	289414	321378	325831	210366	198988	217933	304948	304072	312872	280897	280394	274236	331411	341742	330520	butanoyl-CoA	butanoyl-CoA [ C25 H38 N7 O17 P3 S, tgt=30.24, overall=30.24 ]	(836.12866, 919.2912)(821.12665, 91900.29)(822.12805, 10399.183)(851.1474, 11695.011)(836.12976, 1189.09)(841.1284, 2357.3591)(843.1338, 10360.209)	23.0536
butein	1	1	1	1	1	1494283	1	1	1	16047517	16141532	15942973	1	1	1	butein	butein [ C15 H12 O5, tgt= ]	(255.0547, 330717.3)(256.05756, 37128.504)(257.0599, 1386.2201)	7.89243
buthionine sulfoximine	4800171	5080107	5132739	1	1	1	1	1	1	1	1	1	1	1	1	buthionine sulfoximine	buthionine sulfoximine [ C8 H18 N2 O3 S, tgt= ]	(223.0994, 15873.44)(240.1435, 77654.42)(241.14568, 970.13995)	3.04
C-13sup2/sup-carboxypyropheophorbide ia/i	1	1	1	1	1	1	632777	649153	595595	4385506	4396396	4397375	7715638	7702986	7801808	C-13sup2/sup-carboxypyropheophorbide ia/i	C-13sup2/sup-carboxypyropheophorbide ia/i [ C34 H33 N4 O5, tgt= ]	(578.2482, 46636.594)(579.25073, 9432.642)(577.2802, 17118.613)(578.2761, 1684.7734)	9.8858
caffeate	1098067	1185853	1197950	1	1	1	1045405	1087842	1078573	1	1	1	462505	473007	447480	caffeate	caffeate [ C9 H7 O4, tgt=73.41, overall=73.41 ]	(183.04347, 2190.0984)(161.02287, 26742.764)(162.02422, 1221.4618)(163.02037, 771.74506)(165.043, 337.85)	2.223
calcitetrol	838632	836192	810715	1	1	1	14702823	14885906	14781176	1	1	1	1745256	1755416	1795448	calcitetrol	calcitetrol [ C27H44O4, tgt= ]	(455.30338, 136122.61)(456.30588, 26116.773)	6.80131
calcitriol	1	1	1	814990	813401	802557	1	1	1	1	1	1	1	1	1	calcitriol	calcitriol [ C27 H44 O3, tgt=33.03, overall=33.03 ]	(398.32217, 25771.635)(399.32507, 2478.8135)	10.2618
calendate	553562	1458059	1017108	4874325	4958712	5460669	944515	985092	948512	1	1	1	437726	434888	440306	calendate	calendate [ C18 H29 O2, tgt=66.05, overall=66.05 ]	(279.2196, 5947.326)(280.2228, 655.64)(263.22504, 1864.6234)(262.93875, 1911.9344)(263.2272, 2269.38)(296.44696, 42786.23)(297.2497, 4962.6553)(279.24423, 41896.777)(280.83633, 10936.888)(281.00525, 12929.75)(281.2565, 4983.89)	13.1692
caloxanthin	1	1	1	1477596	1402424	1376639	1	1	1	104500	107781	174400	1	1	1	caloxanthin	caloxanthin [ C40 H56 O3, tgt=13.88, overall=13.88 ]	(589.4575, 6059.245)(603.47064, 31785.941)(604.4721, 6030.067)(589.12775, 6061.3237)(589.4704, 411.54)	21.363
calycosin	1	1	1	1	1	1	1	1	1	2859638	2884991	2933708	1	1	1	calycosin	calycosin [ C16 H12 O5, tgt= ]	(285.06412, 101108.93)(286.06693, 8111.5034)	8.3818
cannabichromenate	1	1	1	318469	306431	328189	10160162	10111662	9953015	1	1	869718	1	1	1	cannabichromenate	cannabichromenate [ C22 H29 O4, tgt=41.10, overall=41.10 ]	(359.21194, 6485.8096)(342.19516, 616.89667)(359.2106, 18055.42)(380.19943, 55156.375)(381.20288, 14671.78)(362.1906, 10976.734)(363.19327, 1435.4501)	4.9416
cannabichromene	1	1	1	1	1	1	2555363	2541164	2537445	898433	906278	911248	1	1	1	cannabichromene	cannabichromene [ C21H30O2, tgt= ]	(315.2391, 5223.555)(297.2296, 22379.074)(298.23227, 1399.7666)(337.22043, 44830.13)(338.2234, 3011.6348)	11.9543
cannabidiol	1	1	1	1	1	1	2555363	2541164	2537445	898433	906278	911248	1	1	1	cannabidiol	cannabidiol [ C21H30O2, tgt= ]	(315.2391, 5223.555)(297.2296, 22379.074)(298.23227, 1399.7666)(337.22043, 44830.13)(338.2234, 3011.6348)	11.9543
cannabidiolate	1	1	1	318469	306431	328189	10160162	10111662	9953015	1	1	869718	1	1	1	cannabidiolate	cannabidiolate [ C22 H29 O4, tgt=41.10, overall=41.10 ]	(359.21194, 6485.8096)(342.19516, 616.89667)(359.2106, 18055.42)(380.19943, 55156.375)(381.20288, 14671.78)(362.1906, 10976.734)(363.19327, 1435.4501)	4.9416
cannabigerolate	1	1	1	1	1	1	1	1	1	4520403	4576101	1	838348	823141	816519	cannabigerolate	cannabigerolate [ C22H31O4, tgt= ]	(359.21304, 8422.546)(360.20178, 1336.255)(342.2232, 9458.424)(346.21893, 31660.332)(384.8244, 1671.3099)(364.20642, 70497.7)(365.20905, 7563.575)	4.1578
cannabinerolate	1	4897674	5001449	2325472	2211197	2768269	1223210	1261670	1216201	4520403	4576101	1023045	838348	823141	816519	cannabinerolate	cannabinerolate [ C22 H31 O4, tgt=59.22, overall=59.22 ]	(359.50458, 15880.029)(360.21573, 1080.47)(342.8888, 7932.518)(346.21893, 31660.332)(361.22617, 246.73334)(342.2265, 203921.53)(343.229, 26184.01)(359.24646, 16232.813)(360.2488, 185.97)(384.976, 28122.879)(386.2307, 7892.1665)(364.70508, 36151.145)(365.20905, 7563.575)	3.74347
canthaxanthin	1	1	1	1	1	1	1	1	1	1	1	1	522422	487778	1	canthaxanthin	canthaxanthin [ C40 H52 O2, tgt=17.44, overall=17.44 ]	(570.42957, 585.175)(549.3932, 32756.219)(550.39545, 3473.665)(593.4165, 4377.68)	14.638
capsaicin	10919024	11384158	11744546	7653762	7975176	7878519	9691875	10067092	10064187	6539935	6428733	6649848	3901229	3905117	3886067	capsaicin	capsaicin [ C18 H27 N O3, tgt=49.38, overall=49.38 ]	(288.19095, 162950.06)(289.19354, 12222.871)(330.18777, 3564.905)(332.20303, 9062.692)	2.3554
capsanthin	500435	522775	522267	1477596	1402424	1376639	945540	927073	924575	104500	107781	174400	2580231	2478854	2564710	capsanthin	capsanthin [ C40 H56 O3, tgt=13.88, overall=13.88 ]	(584.4126, 41066.336)(585.4153, 7691.085)(589.4575, 6059.245)(570.4324, 28699.312)(571.43475, 4221.277)(603.47064, 31785.941)(604.4721, 6030.067)(589.12775, 6061.3237)(589.4704, 411.54)(592.4089, 1549.7167)	16.4444
capsiconiate	1	1	1	713234	707738	1	1	1	1	1	1	1	2059485	408773	2042246	capsiconiate	capsiconiate [ C20 H28 O4, tgt=47.09, overall=47.09 ]	(332.20273, 10758.844)(316.20667, 2607.22)(358.69653, 361.4925)(360.1928, 12933.455)(340.18488, 6513.93)	4.5762
capsorubin	1	1	1	1	1	1	1395278	1385964	1393240	1	1	1	1110413	1115783	1110582	capsorubin	capsorubin [ C40H56O4, tgt= ]	(602.42145, 60223.89)(603.4242, 11368.238)	11.2642
carbidopa	240377	1	1	1	1	1	1	1	1	1	1	1	1	1	1	carbidopa	carbidopa [ C10 H14 N2 O4, tgt= ]	(211.0973, 288.52)(244.1225, 6584.43)	2.2971
carboxin	1	1	1	1	1	1	1	1	1	1	1	1	750647	750873	713470	carboxin	carboxin [ C12 H13 N O2 S, tgt=15.25, overall=15.25 ]	(237.0805, 541.235)(254.77217, 20203.213)(237.0812, 316.64)	2.696
carboxymethyl-CoA	2102318	2156609	2015301	4379640	4269211	4225000	5077940	4973347	2954785	2683118	2428458	2386825	2692471	110757	2643223	carboxymethyl-CoA	carboxymethyl-CoA [ C23 H33 N7 O18 P3 S, tgt=12.68, overall=12.68 ]	(823.1089, 6053.21)(807.10516, 1096.33)(841.3294, 1901.7708)(843.1371, 11333.248)(821.19666, 75002.54)(822.2773, 8496.266)(823.2562, 2958.5063)	22.9552
carlactone	1	1	1	753101	750757	749280	1735502	1765594	1707201	744269	1374320	1330528	1	1	1	carlactone	carlactone [ C19 H26 O3, tgt=21.06, overall=21.06 ]	(302.19293, 9349.475)(288.18954, 83666.71)(289.1926, 5276.515)(328.51498, 3578.1912)(307.16623, 38851.617)	3.83275
carlactone carboxylate	1	1	1	3738038	3730627	3718065	6099014	6135181	5996166	2659010	2761748	2737157	3554838	3608398	3515516	carlactone carboxylate	carlactone carboxylate [ C19 H23 O5, tgt=55.03, overall=55.03 ]	(335.3378, 13285.5205)(313.14084, 91312.164)(314.1437, 9205.126)(336.17667, 100125.305)(337.1791, 11992.433)(350.19083, 13779.013)(351.1902, 125.925)(359.1527, 126.74)	5.4812
carthamidin-7-methyl ether	1	1	1	1	1	1	1	1	1	2859638	2884991	2933708	1	1	1	carthamidin-7-methyl ether	carthamidin-7-methyl ether [ C16 H14 O6, tgt= ]	(285.06412, 101108.93)(286.06693, 8111.5034)	8.3818
casbene	319766	360653	330787	1	1	1	1	1	1	1	1	1	1	1	1	casbene	casbene [ C20 H32, tgt= ]	(295.23553, 21282.799)(296.24646, 684.85333)	13.4055
castasterone	154735	163050	165297	1	1	1	1	137037	132688	3366315	3335354	3425587	848484	804900	847642	castasterone	castasterone [ C28 H48 O5, tgt=25.43, overall=25.43 ]	(468.36984, 3205.3503)(468.36923, 1607.4701)(482.38388, 31397.775)(483.38705, 3487.6982)(488.59256, 2716.1914)(471.14645, 3105.5383)(475.34094, 2606.41)	13.0504
castasterone-23-O-glucoside	245345	250743	253090	103491	86171	88120	443678	442426	442533	1	1	1	1189340	1149559	1185889	castasterone-23-O-glucoside	castasterone-23-O-glucoside [ C34 H58 O10, tgt=1.08, overall=1.08 ]	(627.3894, 3511.89)(628.43677, 25336.79)(629.43994, 7239.0444)(630.4438, 976.52)(651.41, 892.98334)	12.0445
CDP-1-18:1(9Z)-2-16:0-glycerol	1	1	1	4154897	4212457	4300125	1	1	1	126528	131711	125550	1	1	1	CDP-1-18:1(9Z)-2-16:0-glycerol	CDP-1-18:1(9Z)-2-16:0-glycerol [ C46 H81 N3 O15 P2, tgt=44.46, overall=44.46 ]	(960.502, 94996.414)(961.5051, 44156.934)(963.529, 16067.203)(964.5312, 230.32)	8.545
celosianin I	229172	156619	236711	1	120927	118492	150197	138089	254512	138475	138374	142410	161058	172202	164757	celosianin I	celosianin I [ C39 H38 N2 O21, tgt=0.00, overall=0.00 ]	(894.1688, 8363.338)(895.1686, 260.795)(879.1656, 30068.32)(880.1678, 4293.3447)	22.9331
celosianin II	359931	403021	377758	382701	352251	348447	422110	411610	409771	390291	392743	396226	492218	524839	486423	celosianin II	celosianin II [ C40 H40 N2 O22, tgt=11.25, overall=11.25 ]	(923.18774, 3951.428)(908.185, 31952.38)(909.1864, 4494.2256)	23.106
cerulenin	1	1	1	1	1	1	1	1	1	1	1	1	163039	185883	152523	cerulenin	cerulenin [ C12 H17 N O3, tgt= ]	(205.11015, 6586.4165)(246.17073, 6508.2266)(247.11961, 6043.5103)(248.11537, 1004.69336)(249.11711, 557.41)	2.4242
chanoclavine-I	161755	159478	1919483	396050	405692	377731	9641544	9807694	9727460	4704452	4771998	4495892	3878778	3909689	3819874	chanoclavine-I	chanoclavine-I [ C16 H21 N2 O, tgt=54.22, overall=54.22 ]	(245.17584, 161883.58)(277.2031, 12428.077)(278.20587, 1107.6967)(280.16168, 71939.87)(281.1634, 2999.752)(264.64832, 1766.6567)	5.1312
CHAPS	261184	258800	255350	83417	1267169	1257390	777716	791582	780038	1	1	1	557816	556172	565384	CHAPS	CHAPS [ C32 H58 N2 O7 S, tgt=46.37, overall=46.37 ]	(633.14734, 17828.146)(633.4354, 3016.4219)(615.258, 30683.373)(616.22766, 6546.0938)(621.3873, 1320.96)	10.9772
chitobiose	2797627	2986806	2890407	727320	729095	736146	1776007	1874036	1795602	356548	366733	790344	905391	922530	761724	chitobiose	chitobiose [ C12 H26 N2 O9, tgt=47.55, overall=47.55 ]	(346.1809, 7492.6885)(347.17612, 1711.61)(346.1854, 4864.524)(347.17813, 587.3433)(360.19882, 21374.031)(361.2002, 5887.623)(342.85443, 3435.365)(344.3374, 6739.8594)(350.15726, 2121.5466)	3.57373
cholesteryl-&beta;-D-glucoside	1	1	200413	1	1	1	258391	249455	267937	1	1	1	411646	395502	1	cholesteryl-&beta;-D-glucoside	cholesteryl-&beta;-D-glucoside [ C33 H56 O6, tgt=38.78, overall=38.78 ]	(537.4218, 981.5266)(566.4416, 2449.9133)(577.4299, 689.10004)	20.369
chrysophanol	1	1	1	1	1	1494283	1	1	1	16047517	16141532	15942973	1	1	1	chrysophanol	chrysophanol [ C15 H10 O4, tgt= ]	(255.0547, 330717.3)(256.05756, 37128.504)(257.0599, 1386.2201)	7.89243
chrysophanol anthrone	1	1	1	1	1	1	1	1	1	1	607746	1866057	1	1	1	chrysophanol anthrone	chrysophanol anthrone [ C15 H12 O3, tgt= ]	(245.1036, 917.87)(263.1316, 53421.04)(244.12, 6505.2803)	2.677
ciceritol	1	1	1	1	1	1	1	1	1	1918697	1855078	1	1	1	1	ciceritol	ciceritol [ C19 H34 O16, tgt= ]	(537.2376, 6014.185)(521.2157, 200.69)	7.86422
cinchonidine	311736	336348	312929	13509851	13261934	1	1250304	1251193	1212003	5638891	5810467	5637823	3458655	3526186	3515673	cinchonidine	cinchonidine [ C19 H23 N2 O, tgt=33.96, overall=33.96 ]	(298.00543, 8127.959)(298.1818, 744.44)(278.17285, 13008.257)(318.16763, 68860.18)(319.16965, 8446.404)	5.242
cinchonine	311736	336348	312929	13509851	13261934	1	1250304	1251193	1212003	5638891	5810467	5637823	3458655	3526186	3515673	cinchonine	cinchonine [ C19 H23 N2 O, tgt=33.96, overall=33.96 ]	(298.00543, 8127.959)(298.1818, 744.44)(278.17285, 13008.257)(318.16763, 68860.18)(319.16965, 8446.404)	5.242
cinnamoylserotonin	1	1	1	2653663	2669436	2763519	370339	371891	408054	1	1	1	964582	957044	1	cinnamoylserotonin	cinnamoylserotonin [ C19 H18 N2 O2, tgt=16.73, overall=16.73 ]	(306.1305, 3492.388)(329.1872, 2816.88)(307.16574, 626.6167)(329.13434, 30113.453)(330.13638, 2801.7734)(311.12415, 13070.051)	3.98746
cinnamoyltyramine	1549542	1653235	1628541	2398610	2363683	2387327	11713907	12155719	12310411	4438211	4445360	4384712	2721717	2744868	2792869	cinnamoyltyramine	cinnamoyltyramine [ C17 H17 N O2, tgt=43.60, overall=43.60 ]	(267.1225, 52591.312)(268.12332, 4432.6455)(249.11494, 4160.465)(272.1495, 147.21333)(250.12498, 11941.128)(251.13916, 3132.0898)(286.16342, 16772.41)(287.16168, 3007.923)(269.14917, 7798.0537)(270.82266, 523.19336)(293.03296, 1958.93)(294.13297, 4080.2136)(276.1232, 121.525)	2.817
citramalate	2431818	2560629	2562131	2955193	2822487	2817475	2953255	3027339	3045514	2621162	2633130	2579227	2551931	2547150	2541294	citramalate	citramalate [ C5 H6 O5, tgt=58.66, overall=58.66 ]	(151.02965, 143840.2)(128.014, 141645.3)(129.0148, 19930.479)(130.01068, 10283.287)(129.01605, 17283.137)(130.01202, 9524.754)(154.00682, 3311.9846)(155.0055, 295.825)	2.0036
cocaine	1247386	255340	244169	1146044	4034604	4150017	545546	135388	1	1	1	1	4039613	3954597	3877745	cocaine	cocaine [ C17 H22 N O4, tgt=38.97, overall=38.97 ]	(304.53238, 54605.223)(305.15576, 6319.54)(287.8132, 3396.0166)(309.1686, 4311.34)(287.15903, 9566.645)(323.1836, 16519.994)(331.152, 3094.5635)(313.1405, 62637.02)(314.1431, 5970.35)	3.793
codeine	401325	465516	451486	304463	310507	301860	585596	638365	607734	397298	403792	1206107	1350927	1157314	1124476	codeine	codeine [ C18 H22 N O3, tgt=59.34, overall=59.34 ]	(302.70157, 8369.643)(303.2901, 10300.2)(305.16504, 951.54004)(286.16315, 2538.2)(287.15976, 3276.0598)(304.1693, 2533.26)(286.1654, 80240.914)(287.1676, 6233.453)(318.18854, 8439.259)(300.17883, 6350.9727)(301.1818, 2161.41)(306.14252, 565.5375)	3.78413
codeinone	1	1	1	3171248	3053478	3067028	607969	613159	615900	668999	675147	680074	294289	284225	292159	codeinone	codeinone [ C18 H20 N O3, tgt=36.72, overall=36.72 ]	(303.151, 270.16666)(303.91565, 10497.948)(304.1648, 26618.18)(281.13638, 13308.691)(282.13846, 769.8867)(317.1804, 10070.996)(317.16833, 4439.967)(300.1781, 8168.139)(301.17953, 480.70667)(303.13113, 8901.792)	3.0398
coenzyme A	4917718	5087652	5146240	5139689	4968269	4869528	5678020	5568855	5427335	5113324	5062680	5102827	5385450	5361708	5310885	coenzyme A	coenzyme A [ C21 H32 N7 O16 P3 S, tgt=59.22, overall=59.22 ]	(763.08527, 90726.0)(764.08655, 8460.027)(749.07056, 1012.2987)(784.84955, 13714.731)(784.0993, 1267.33)(785.104, 15605.03)(763.0881, 92556.76)(764.0893, 8850.712)(792.103, 79645.805)(771.0861, 218.04)	22.7592
coenzyme-A-group	4917718	5087652	5146240	5139689	4968269	4869528	5678020	5568855	5427335	5113324	5062680	5102827	5385450	5361708	5310885	coenzyme-A-group	coenzyme-A-group [ C21 H32 N7 O16 P3 S, tgt=59.22, overall=59.22 ]	(763.08527, 90726.0)(764.08655, 8460.027)(749.07056, 1012.2987)(784.84955, 13714.731)(784.0993, 1267.33)(785.104, 15605.03)(763.0881, 92556.76)(764.0893, 8850.712)(792.103, 79645.805)(771.0861, 218.04)	22.7592
cohumulone	4033842	4067604	4036734	635850	1110790	654177	1336462	1305316	1307365	653567	5071732	657732	251887	268684	242119	cohumulone	cohumulone [ C20 H27 O5, tgt=58.65, overall=58.65 ]	(349.3695, 3365.781)(350.1929, 4797.4775)(330.4115, 6449.212)(331.1825, 1514.2999)(365.20935, 8745.37)(347.64444, 29550.025)(348.2055, 7017.26)(372.93283, 3546.667)(374.19116, 1822.13)(352.16998, 14403.748)(353.1735, 326.31332)	3.99007
colchicine	645958	681766	644561	242872	235410	222868	1674208	1	1	13073579	12923515	12767846	2367293	2342419	2389529	colchicine	colchicine [ C22 H25 N O6, tgt=70.51, overall=70.51 ]	(405.1894, 2453.4)(418.7099, 21003.53)(419.71225, 1960.385)(421.22195, 1075.6166)(422.15466, 185099.98)(423.15732, 38055.58)(424.1588, 6857.27)	10.0949
colneleate	7174679	7414453	7318749	2500215	2415936	2063807	2329480	2286008	2270406	618581	1	605350	3747465	3644194	3818412	colneleate	colneleate [ C18 H29 O3, tgt=65.39, overall=65.39 ]	(295.2136, 744.37)(277.20508, 12684.405)(279.0937, 4794.89)(295.2306, 4919.54)(278.5476, 231951.31)(279.55063, 27139.814)(279.2193, 59504.49)(280.2232, 5714.38)(294.6627, 91270.93)(295.69968, 11860.707)(296.24652, 64168.305)(297.25037, 9766.179)(316.2098, 11751.653)	13.772
colnelenate	1	500904	472836	1	1	1	1	1	1	1	1	1	1	1	1	colnelenate	colnelenate [ C18 H27 O3, tgt= ]	(292.20117, 16760.17)(317.188, 1048.77)	7.30267
columbamine	1	1	1	1	1	1	1113822	1	1	1	1	1	1	1	1	columbamine	columbamine [ C20 H20 N O4, tgt=10.96, overall=10.96 ]	(321.1405, 39485.84)	3.0142
coniferin	1	1	1	1	1	1	173788	183346	171356	1	1	1	1	1	1	coniferin	coniferin [ C16 H22 O8, tgt=47.58, overall=47.58 ]	(329.13388, 7245.0835)	4.60467
coniferonate	1	1	1	1	1	377731	1	1	1	1	1	1	1	1	1	coniferonate	coniferonate [ C18 H27 O2, tgt= ]	(277.2034, 11865.63)(278.206, 1039.09)	8.711
coniferyl acetate	1190074	1266358	1225630	1	1	1	1	1	1	1	1	1	714878	731477	686281	coniferyl acetate	coniferyl acetate [ C12 H14 O4, tgt=32.94, overall=32.94 ]	(223.09888, 20236.08)(243.12445, 23221.188)	2.803
copal-8-ol-diphosphate	1	1	1	1	1	1	413738	437576	406922	1	1	1	652036	687529	658405	copal-8-ol-diphosphate	copal-8-ol-diphosphate [ C20 H35 O8 P2, tgt= ]	(451.19717, 14669.944)(452.2002, 953.77325)(485.72885, 374133.25)(465.1985, 14839.106)(466.20035, 277.04666)	4.3025
coproporphyrin I	1076793	1141381	1087247	1	1	1	1	1	1	1	1	1	1	1	1	coproporphyrin I	coproporphyrin I [ C36H34N4O8, tgt= ]	(668.2696, 28778.033)(669.2715, 2161.77)	5.7428
coproporphyrin III	1076793	1141381	1087247	1	1	1	1	1	1	1	1	1	1	1	1	coproporphyrin III	coproporphyrin III [ C36 H34 N4 O8, tgt=52.17, overall=52.17 ]	(668.2696, 28778.033)(669.2715, 2161.77)	5.314
coproporphyrinogen III	1	1	1	781220	717072	744886	290647	302707	264369	1102756	1096501	1	1	1	1	coproporphyrinogen III	coproporphyrinogen III [ C36 H40 N4 O8, tgt=32.38, overall=32.38 ]	(656.2743, 2538.0667)(638.7729, 13399.992)(640.2791, 2364.8484)(663.3171, 728.7934)(675.33887, 25074.506)(676.344, 12928.095)	6.14793
coronatine	311736	336348	312929	292036	310507	246759	1322012	1325426	1270153	3596659	3685436	3523468	2368701	2378010	2470147	coronatine	coronatine [ C18 H24 N O4, tgt=59.34, overall=59.34 ]	(319.17273, 46463.137)(319.16995, 5681.213)(300.1593, 4844.99)(301.16467, 1322.11)(341.21396, 19556.135)(320.19418, 1640.6934)	5.5122
cortisol	1065164	1087978	1041703	795939	1	1	246229	1495647	1561096	714828	1	441188	801308	814640	774989	cortisol	cortisol [ C21 H30 O5, tgt=47.17, overall=47.17 ]	(364.20535, 8100.325)(345.2029, 13277.81)(346.2132, 1560.01)(347.2111, 2024.88)(346.02878, 35909.77)(347.21933, 7375.9116)(386.0011, 13558.203)(386.20044, 4380.023)(368.19302, 9676.742)	3.78785
cortisone	4224479	4242662	4054593	1068039	1157784	3934056	1439995	1443203	1461278	1201279	1211088	790344	3558402	3535060	3768381	cortisone	cortisone [ C21 H28 O5, tgt=47.06, overall=47.06 ]	(361.28503, 8844.517)(362.99557, 2997.4563)(365.2094, 104.565)(342.18762, 3311.1938)(343.1845, 172.855)(362.8706, 915.48663)(364.2072, 2609.705)(345.69855, 1083.3575)(378.22202, 63424.082)(379.2242, 7720.934)(363.2192, 340.72665)(385.69388, 13455.672)(386.20044, 2203.0632)(368.18317, 9782.37)(367.1864, 192.51)	5.41227
corynantheal	311736	336348	312929	13509851	13261934	1	1250304	1251193	1212003	5638891	5810467	5637823	3458655	3526186	3515673	corynantheal	corynantheal [ C19 H23 N2 O, tgt=33.96, overall=33.96 ]	(298.00543, 8127.959)(298.1818, 744.44)(278.17285, 13008.257)(318.16763, 68860.18)(319.16965, 8446.404)	5.242
coumaraldehyde	207436	219855	226607	1	1	1	1	1	1	1	1	1	202101	1	1	coumaraldehyde	coumaraldehyde [ C9 H8 O2, tgt= ]	(130.04462, 334.02335)(169.0912, 1674.72)(153.02771, 10322.553)	2.023
crepenynate	553562	1458059	1017108	4874325	4958712	5460669	944515	985092	948512	1	1	1	437726	434888	440306	crepenynate	crepenynate [ C18 H29 O2, tgt=66.05, overall=66.05 ]	(279.2196, 5947.326)(280.2228, 655.64)(263.22504, 1864.6234)(262.93875, 1911.9344)(263.2272, 2269.38)(296.44696, 42786.23)(297.2497, 4962.6553)(279.24423, 41896.777)(280.83633, 10936.888)(281.00525, 12929.75)(281.2565, 4983.89)	13.1692
crocetin	1	1	1	1	1	1	1	1	1	701597	662610	666178	1	1	1	crocetin	crocetin [ C20 H22 O4, tgt= ]	(326.15195, 23734.576)(347.2037, 152321.2)(348.20557, 6729.7534)(330.18765, 7274.133)	5.1185
crocetin dialdehyde	1	1	1	703321	654811	655219	134992	148419	142062	2074162	2130531	2157568	884750	882696	6955382	crocetin dialdehyde	crocetin dialdehyde [ C20 H24 O2, tgt=47.53, overall=47.53 ]	(297.5834, 6264.4443)(278.17087, 11289.921)(300.0461, 23251.494)(298.1818, 958.7233)(316.2104, 38320.84)(317.2124, 609.0)(299.20575, 2552.125)(319.98782, 10965.515)(323.179, 1384.8365)(304.16287, 5707.61)	4.86975
crotonyl-CoA	2027587	2114395	2119412	2421695	2341791	2308808	2749549	2702326	2661692	2466371	2470349	2332148	2644163	2685488	2611409	crotonyl-CoA	crotonyl-CoA [ C25 H36 N7 O17 P3 S, tgt=33.46, overall=33.46 ]	(836.12964, 6363.644)(813.78296, 5724.274)(814.12067, 9329.33)(850.1461, 48913.355)(851.1463, 6433.315)(852.1247, 2287.651)(853.1279, 483.23)	23.0536
curcumin 4'-O-&beta;-D-gentiobioside	328647	356788	335607	1	1	1	1	1	1	1	1	1	1	1	1	curcumin 4'-O-&beta;-D-gentiobioside	curcumin 4'-O-&beta;-D-gentiobioside [ C33 H40 O16, tgt=12.92, overall=12.92 ]	(711.28076, 13604.992)(712.28143, 2737.6367)	5.297
curcumin diglucoside	328647	356788	335607	1	1	1	1	1	1	1	1	1	1	1	1	curcumin diglucoside	curcumin diglucoside [ C33 H40 O16, tgt=12.92, overall=12.92 ]	(711.28076, 13604.992)(712.28143, 2737.6367)	5.297
curcumin monoglucoside	1	1	1	1	1	1	1	1	1	1	1	1	1167374	1179325	1180842	curcumin monoglucoside	curcumin monoglucoside [ C27H30O11, tgt= ]	(530.2009, 16747.908)(531.2027, 2089.0732)(539.1736, 632.07)	12.252
cyanidin	1	1	1	1	1	1	1	1	1	2859638	2884991	2933708	1	1	1	cyanidin	cyanidin [ C15 H9 O6, tgt= ]	(285.06412, 101108.93)(286.06693, 8111.5034)	8.37675
cyanidin 3-iO/i-&beta;-(2-iO/i-&beta;-D-glucuronosyl)-&beta;-D-glucoside	1	1	1	1	1	1	1	360670	1	1	1	1	554431	533031	537351	cyanidin 3-iO/i-&beta;-(2-iO/i-&beta;-D-glucuronosyl)-&beta;-D-glucoside	cyanidin 3-iO/i-&beta;-(2-iO/i-&beta;-D-glucuronosyl)-&beta;-D-glucoside [ C27 H27 O17, tgt= ]	(624.11127, 9322.649)(605.098, 1924.7075)(634.11304, 1329.2975)	18.424
cyanidin 3-iO/i-(3'',6''-iO/i-dimalonyl-&beta;-glucopyranoside)	1	1	1	1	1	1	1	1	1	1	1	1	187045	191240	215043	cyanidin 3-iO/i-(3'',6''-iO/i-dimalonyl-&beta;-glucopyranoside)	cyanidin 3-iO/i-(3'',6''-iO/i-dimalonyl-&beta;-glucopyranoside) [ C27 H22 O17, tgt= ]	(618.10114, 789.4766)(600.0921, 334.75)(619.10455, 2341.4434)(605.09875, 1891.2734)(639.1197, 1147.3267)	18.2016
cyanidin 3-iO/i-[2\-iO/i-xylosyl) 6\	1	1	1	1	1	1	185628	174625	176508	141927	131653	130870	309420	298465	316116	cyanidin 3-iO/i-[2\-iO/i-xylosyl) 6\	cyanidin 3-iO/i-[2\-iO/i-xylosyl) 6\ [ C35 H35 O17, tgt=43.13, overall=43.13 ]	(747.2258, 2322.0078)(727.211, 5825.1025)(728.21454, 917.0633)	23.697
cyanidin 3-iO/i-glucoside-7-iO/i-(6-iO/i-(4-iO/i-(6-iO/i-(p-hydroxybenzoyl)-glucosyl)-oxybenzoyl)-glucoside)	155944	175486	169284	171310	160208	163178	237815	244970	238808	206106	210668	212228	382243	401365	406593	cyanidin 3-iO/i-glucoside-7-iO/i-(6-iO/i-(4-iO/i-(6-iO/i-(p-hydroxybenzoyl)-glucosyl)-oxybenzoyl)-glucoside)	cyanidin 3-iO/i-glucoside-7-iO/i-(6-iO/i-(4-iO/i-(6-iO/i-(p-hydroxybenzoyl)-glucosyl)-oxybenzoyl)-glucoside) [ C47 H48 O25, tgt=15.98, overall=15.98 ]	(995.24164, 11377.625)(995.24286, 11606.089)(996.24664, 1448.46)(1024.2622, 5151.1567)	23.4876
cyanidin 3-iO/i-glucoside-7-iO/i-(6-iO/i-(p-hydroxybenzoyl)-glucoside)	1	1	1	1	1	1	1	1	1	1	1	1	276364	248299	261030	cyanidin 3-iO/i-glucoside-7-iO/i-(6-iO/i-(p-hydroxybenzoyl)-glucoside)	cyanidin 3-iO/i-glucoside-7-iO/i-(6-iO/i-(p-hydroxybenzoyl)-glucoside) [ C34 H34 O18, tgt= ]	(731.1799, 2019.7734)(735.18304, 4473.0166)(715.1675, 1745.58)(716.1713, 5951.9272)(750.1923, 3604.487)	19.0346
cyanidin-3-iO/i-rutinoside-5-iO/i-&beta;-D-glucoside	1	128752	151698	1	1	1	244955	286893	267388	1	1	1	623084	616657	609382	cyanidin-3-iO/i-rutinoside-5-iO/i-&beta;-D-glucoside	cyanidin-3-iO/i-rutinoside-5-iO/i-&beta;-D-glucoside [ C33 H40 O20, tgt= ]	(759.2011, 4219.455)(760.2039, 1504.9733)(740.1865, 10475.547)(740.19116, 7974.618)(779.2179, 2723.5083)	19.4188
cyclo-acetoacetyl-iL/i-tryptophan	1	1	1	1	1	1	1	1	1	1	1	1	13890488	13844103	14019172	cyclo-acetoacetyl-iL/i-tryptophan	cyclo-acetoacetyl-iL/i-tryptophan [ C15 H13 N2 O3, tgt= ]	(251.08203, 359705.5)(252.08484, 35523.438)(253.08636, 815.93335)	3.5952
cyclohex-1-ene-1-carbonyl-CoA	234529	623658	545666	263036	244324	534144	650503	274344	260110	602941	271243	606618	715508	729804	307443	cyclohex-1-ene-1-carbonyl-CoA	cyclohex-1-ene-1-carbonyl-CoA [ C28 H40 N7 O17 P3 S, tgt=47.49, overall=47.49 ]	(857.42426, 2279.6335)(872.1577, 10685.7)(858.1452, 1264.5133)(894.1686, 9488.897)(895.1659, 599.62714)(881.03345, 1553.1123)	22.8312
cycloheximide	1	1	1	4009145	4028686	4143484	603195	252462	595222	478873	489045	439510	3768874	3795402	3726375	cycloheximide	cycloheximide [ C15 H23 N O4, tgt=65.39, overall=65.39 ]	(281.16293, 4302.1704)(264.15024, 2981.6301)(284.18005, 832.10004)(299.19528, 3237.9167)(304.15298, 36091.26)(305.1553, 5363.9165)(287.1439, 1819.71)	4.19477
cyclooctatin	1	1	1	1	1	1	1336778	1368951	1	1	1	1	1	1	1	cyclooctatin	cyclooctatin [ C20 H34 O3, tgt= ]	(345.2409, 18490.828)(346.23938, 108.44501)	4.619
cytosine	160567	176354	177714	1	1	1	1	1	1	1	1	1	1	1	1	cytosine	cytosine [ C4 H5 N3 O, tgt=38.88, overall=38.88 ]	(112.046104, 7249.0435)(130.08113, 10021.489)(137.0404, 805.5833)	2.328
D,L-5-fluorotryptophan	258954	244666	1	1	1	1	670639	684313	706032	300306	302380	292674	714878	731477	246523	D,L-5-fluorotryptophan	D,L-5-fluorotryptophan [ C11 H11 F N2 O2, tgt=68.10, overall=68.10 ]	(243.12367, 23176.86)(244.1214, 4659.7417)	2.76225
D,L-malic semialdehyde	79793	188303	1	1574771	1479388	1449575	1496647	1526603	1517508	1389990	1348390	1297794	630989	607822	193837	D,L-malic semialdehyde	D,L-malic semialdehyde [ C4 H5 O4, tgt=35.23, overall=35.23 ]	(102.017555, 5723.7275)(123.03555, 74728.68)(101.23507, 6552.1626)(102.01769, 5658.3276)(143.01355, 2616.26)	2.034
daidzein	1	1	1	1	1	1494283	1	1	1	16047517	16141532	15942973	1	1	1	daidzein	daidzein [ C15 H10 O4, tgt= ]	(255.0547, 330717.3)(256.05756, 37128.504)(257.0599, 1386.2201)	7.89243
dalcochinin-8'-O-&beta;-glucoside	1	1	1	175255	171610	178931	184093	182141	1	2429229	2435618	2411439	1	1	1	dalcochinin-8'-O-&beta;-glucoside	dalcochinin-8'-O-&beta;-glucoside [ C29 H34 O12, tgt=47.03, overall=47.03 ]	(598.2009, 2565.9402)(592.2479, 10945.301)(593.2511, 340.66998)(576.21686, 8941.67)(576.2202, 59381.67)(577.22363, 16089.211)(578.2441, 3943.1667)(579.249, 183.61)	11.2532
dalnigrein 7-O-&beta;-D-apiofuranosyl-(1-6)-&beta;-D-glucopyranoside	1	1	1	1	1	1	281252	265667	267338	1	1	1	1	1	1	dalnigrein 7-O-&beta;-D-apiofuranosyl-(1-6)-&beta;-D-glucopyranoside	dalnigrein 7-O-&beta;-D-apiofuranosyl-(1-6)-&beta;-D-glucopyranoside [ C30 H38 O16, tgt= ]	(636.2111, 13027.609)(637.2122, 1841.6766)	7.7268
daphnetin	1059102	1133389	1157466	1	1	1	1013075	1055186	1046478	1	1	1	462505	473007	447480	daphnetin	daphnetin [ C9 H6 O4, tgt=49.62, overall=49.62 ]	(161.0223, 30440.688)(162.02364, 966.97675)(163.01958, 691.01)(183.04347, 2190.0984)(161.02318, 24526.416)(162.0248, 1445.7267)(163.02116, 830.8867)	2.22567
deacetylcolchicine	1	1	1	1465205	1439894	1436045	1	1	1	1545170	1330388	1462523	9388182	9418474	9514932	deacetylcolchicine	deacetylcolchicine [ C20 H24 N O5, tgt=37.69, overall=37.69 ]	(359.6744, 35610.49)(360.17468, 4971.3364)(341.16696, 17902.799)(342.184, 1139.89)(376.20834, 257171.94)(377.21118, 42422.773)(360.20364, 12620.536)(362.19434, 14179.594)	6.2718
decoyinine	1	1	1	647840	626287	627177	590027	598228	577831	1	1	1	641004	642157	623652	decoyinine	decoyinine [ C11 H13 N5 O4, tgt=23.87, overall=23.87 ]	(284.45297, 6384.862)(285.12085, 31136.701)(279.12427, 8706.514)(280.11972, 1624.6034)	2.695
decylglucoside	2222507	2208312	2267658	1707211	1726626	1751956	1	235697	876018	1	310856	575627	1	1	1	decylglucoside	decylglucoside [ C16 H32 O6, tgt=56.62, overall=56.62 ]	(320.24463, 61423.574)(321.2476, 5639.437)(346.21722, 29919.893)(347.21967, 1526.2639)(327.9184, 2314.6458)(330.2216, 9422.76)	8.07008
deferoxamine	119354	114030	1	1	1	1	125423	140341	530658	1	1	1	267211	1	284931	deferoxamine	deferoxamine [ C25 H49 N6 O8, tgt=22.18, overall=22.18 ]	(562.3634, 15890.375)(564.3534, 3772.28)(545.34296, 10043.194)(546.3464, 282.61)(545.34467, 10905.68)(546.3477, 568.31)(584.4132, 12414.399)(585.4159, 1941.9141)(588.85754, 14011.73)(589.3496, 5227.54)(569.3379, 8115.8)	10.9992
dehydroabietadienol	1	1	1	143126	1	1	1	1	1	1	1	1	1	1	1	dehydroabietadienol	dehydroabietadienol [ C20 H30 O, tgt=45.81, overall=45.81 ]	(309.2098, 8821.06)(292.2124, 319.25)	9.12
dehydro-D-arabinono-1,4-lactone	2431818	2560629	2562131	2955193	2822487	2817475	2953255	3027339	3045514	2621162	2633130	2579227	2551931	2547150	2541294	dehydro-D-arabinono-1,4-lactone	dehydro-D-arabinono-1,4-lactone [ C5 H6 O5, tgt=58.66, overall=58.66 ]	(151.02965, 143840.2)(128.014, 141645.3)(129.0148, 19930.479)(130.01068, 10283.287)(129.01605, 17283.137)(130.01202, 9524.754)(154.00682, 3311.9846)(155.0055, 295.825)	2.0036
dehydroscoulerine	1	1	1	1	1	1	173788	183346	171356	1	1	1	1	1	1	dehydroscoulerine	dehydroscoulerine [ C19 H18 N O4, tgt= ]	(324.1307, 6948.693)(329.13388, 7245.0835)	3.2502
dehypoxanthine futalosine	1	1	1	1	1	1	290425	295499	290640	1	1	1	1	1	1	dehypoxanthine futalosine	dehypoxanthine futalosine [ C14 H15 O7, tgt= ]	(313.10666, 3873.8665)(297.11252, 4592.39)	2.863
delphinidin 3,5-di-iO/i-&beta;-D-glucoside	1	1	1	383093	338991	338632	469920	470564	459998	1	1	1	473151	437478	433971	delphinidin 3,5-di-iO/i-&beta;-D-glucoside	delphinidin 3,5-di-iO/i-&beta;-D-glucoside [ C27 H30 O17, tgt=0.03, overall=0.03 ]	(630.0337, 3754.1345)(611.1312, 3946.4678)(631.14874, 4588.5864)(611.1336, 3391.21)(650.1576, 12369.995)(631.14545, 5334.635)	23.364
delphinidin 3,7-di iO/i-&beta;-iD/i-glucoside	1	1	1	383093	338991	338632	469920	470564	459998	1	1	1	473151	437478	433971	delphinidin 3,7-di iO/i-&beta;-iD/i-glucoside	delphinidin 3,7-di iO/i-&beta;-iD/i-glucoside [ C27 H30 O17, tgt=0.03, overall=0.03 ]	(630.0337, 3754.1345)(611.1312, 3946.4678)(631.14874, 4588.5864)(611.1336, 3391.21)(650.1576, 12369.995)(631.14545, 5334.635)	23.364
delphinidin 3-iO/i-rutinoside-7-iO/i-glucoside	1	1	1	1	1	1	1	1	1	1	1	1	179960	181841	179645	delphinidin 3-iO/i-rutinoside-7-iO/i-glucoside	delphinidin 3-iO/i-rutinoside-7-iO/i-glucoside [ C33 H40 O21, tgt= ]	(755.1982, 3008.9133)(759.2016, 7519.867)(760.2039, 2062.9202)(774.21045, 4025.91)(779.2163, 1725.7933)	19.49
delphinidin 3-iO/i-sophoroside	1	1	1	383093	338991	338632	469920	470564	459998	1	1	1	473151	437478	433971	delphinidin 3-iO/i-sophoroside	delphinidin 3-iO/i-sophoroside [ C27 H30 O17, tgt=0.03, overall=0.03 ]	(630.0337, 3754.1345)(611.1312, 3946.4678)(631.14874, 4588.5864)(611.1336, 3391.21)(650.1576, 12369.995)(631.14545, 5334.635)	23.364
demecolcine	354805	401129	394717	552017	543510	554720	1055281	1067718	876268	622370	654501	664059	1	1	1	demecolcine	demecolcine [ C21 H26 N O5, tgt=49.52, overall=49.52 ]	(373.19028, 12721.75)(374.19125, 3264.1667)(358.91132, 8085.181)(360.1993, 21369.646)(374.29208, 13610.129)(375.42957, 4212.432)(375.2161, 7029.125)(376.20605, 3259.115)(397.85507, 7265.8765)	3.74273
demethylmenaquinol-7	682018	717426	568294	528355	497751	476131	701074	692976	548411	584425	525933	550565	349720	1836135	1784457	demethylmenaquinol-7	demethylmenaquinol-7 [ C45 H64 O2, tgt=41.49, overall=41.49 ]	(638.6605, 4335.3516)(639.4978, 8014.49)(640.4985, 1432.3745)(618.4875, 8263.504)(619.48004, 877.48)(638.4977, 5178.395)(639.5006, 10739.37)(640.5039, 1295.875)(654.5062, 6028.1006)(655.5054, 1795.59)(664.3098, 1437.4429)(647.2033, 20173.264)(647.50555, 10537.187)	22.1592
demethylphylloquinone	1925354	2027926	1929747	1	1	1	4534046	4427491	4365450	1	1	1	1555190	1545892	1	demethylphylloquinone	demethylphylloquinone [ C30 H44 O2, tgt=72.32, overall=72.32 ]	(442.31903, 117162.3)(443.3217, 16373.896)(444.32144, 801.8333)	8.119
deoxycholate	842806	1166175	1	1	1	1	1	1	1	1	1	249378	1	1	1	deoxycholate	deoxycholate [ C24H39O4, tgt= ]	(373.264, 7232.8)(414.2619, 21168.145)(415.266, 253.2)(401.2697, 69183.58)	3.3086
deoxypodophyllotoxin	405651	436539	401759	675919	641995	619033	1	1	1	1	1	1	1	1	1	deoxypodophyllotoxin	deoxypodophyllotoxin [ C22 H22 O7, tgt=55.79, overall=55.79 ]	(386.1555, 8730.764)(416.16492, 13333.466)(399.16208, 27438.955)(400.16507, 1116.8567)	11.421
deoxypumiloside	1	1	1	1	120121	116698	531732	557645	521655	1	1	956167	1	1	1	deoxypumiloside	deoxypumiloside [ C26 H28 N2 O8, tgt= ]	(516.21716, 12885.305)(515.21844, 1041.43)(497.21594, 13696.09)(498.2209, 4706.14)	5.2389
desacetoxyvindoline	523771	608530	561588	912496	898368	903912	3117682	1020438	994495	3653757	3794688	3762690	1199060	391698	242613	desacetoxyvindoline	desacetoxyvindoline [ C23 H31 N2 O4, tgt=47.36, overall=47.36 ]	(400.33615, 6839.8438)(382.2273, 789.095)(403.23303, 151.27)(382.72595, 7152.3164)(383.2284, 1762.49)(417.2518, 437.03)(400.25253, 65776.836)(401.3665, 10009.054)(422.71585, 4498.797)(407.43384, 13112.138)(408.5987, 1987.975)	4.10407
desacetylmycothiol	1	1	1	1	1	1	288034	318807	294401	1	1	1	1	1	1	desacetylmycothiol	desacetylmycothiol [ C15 H29 N2 O11 S, tgt= ]	(463.17627, 15061.211)(464.17908, 382.235)(456.13388, 2592.1765)	12.952
des-acyl avenacin A	1	1	1	302034	326151	10739369	1	1	1	4262473	4228439	4259051	226816	244520	239058	des-acyl avenacin A	des-acyl avenacin A [ C47 H76 O20, tgt=59.32, overall=59.32 ]	(961.6927, 7086.05)(963.5013, 3390.2168)(945.09503, 71505.945)(946.09766, 30373.4)(945.49164, 7892.9)(979.53107, 4381.205)(980.53357, 988.83)(961.5256, 186140.19)(962.5281, 88660.93)(963.5298, 16615.27)(964.5312, 230.32)(965.46564, 1017.2)	9.967
desferrioxamine B	433793	460358	462280	2430642	2389407	2343135	1083719	1089741	1054821	3669577	3713694	4353689	787981	821930	825437	desferrioxamine B	desferrioxamine B [ C25 H48 N6 O8, tgt=23.64, overall=23.64 ]	(560.3739, 17978.604)(561.37506, 3779.198)(588.3496, 9318.813)(589.35016, 4078.7136)(569.3383, 8249.617)	8.7484
desoxyhemigossypol	275755	305796	320260	1	1	1	1004131	1059963	972843	1	1	1	1	1	1	desoxyhemigossypol	desoxyhemigossypol [ C15 H16 O3, tgt=46.22, overall=46.22 ]	(245.11841, 3771.7852)(246.62012, 8878.002)(263.1454, 2584.105)(246.13684, 59801.51)(249.15007, 1627.3568)(269.10306, 2708.36)	4.03791
desoxyhemigossypol-6-methyl ether	1	1	1	297207	274320	277257	1	1	1	322081	334411	324633	1	1	1	desoxyhemigossypol-6-methyl ether	desoxyhemigossypol-6-methyl ether [ C16 H18 O3, tgt=45.30, overall=45.30 ]	(261.13376, 14238.523)(243.12294, 3189.1367)(246.13515, 47185.34)(276.15536, 5007.2715)(260.14914, 59696.113)(283.11588, 3138.375)(285.12173, 23432.604)(286.12924, 3490.2297)(267.12195, 37057.406)(268.12454, 1874.105)	2.53
dethiobiotin	27901628	29088668	29200888	21511080	20592744	20608204	17150630	17594856	17837652	15646844	15843740	15575683	1	15638256	15842761	dethiobiotin	dethiobiotin [ C10 H17 N2 O3, tgt=70.62, overall=70.62 ]	(215.13025, 6476.912)(197.1201, 156.48)(215.12878, 7017.877)(217.14447, 18595.764)(218.14331, 802.8467)(197.1189, 811.4067)(199.1341, 625.77)(231.1608, 243457.1)(232.16347, 17032.186)(237.11314, 31419.033)(238.41948, 1432.571)(218.10425, 74.035)	2.7034
D-fructosyl-L-lysine	1	132023	242139	305678	313529	315404	1	1	1	193289	204573	216265	674755	696071	669788	D-fructosyl-L-lysine	D-fructosyl-L-lysine [ C12 H25 N2 O7, tgt=28.24, overall=28.24 ]	(309.66644, 7154.635)(294.1683, 267.58)(311.17038, 31773.768)(296.75125, 6541.3384)(328.45126, 10753.6875)(314.54492, 8797.037)	4.42725
D-glucose 1-phosphate	299186	318449	308998	441246	441748	421648	487713	485010	495431	359290	363455	359198	331691	331445	323138	D-glucose 1-phosphate	D-glucose 1-phosphate [ C6 H13 O9 P, tgt=13.54, overall=13.54 ]	(264.06622, 4503.716)(265.00504, 28990.889)(266.00616, 5806.993)	1.997
D-glutamate	2623748	2652183	2667486	2890741	2741887	2594255	2755941	2748515	2858685	2499763	2693777	2665433	2493810	2492386	2669879	D-glutamate	D-glutamate [ C5 H8 N O4, tgt=32.11, overall=32.11 ]	(130.0444, 264.99)(169.0912, 1876.9801)(170.04137, 576.0361)(151.897, 33811.35)(152.89398, 12055.498)(153.02554, 13474.2)	2.013
D-glutamine	218752	252099	227575	1	1	1	1	1	1	1	1	1	1	1	1	D-glutamine	D-glutamine [ C5 H10 N2 O3, tgt=27.04, overall=27.04 ]	(130.0598, 2970.13)(146.09038, 7168.27)	4.296
D-glycerate	1	1	1	2582993	2474109	2474505	2604003	2675466	831443	126313	234563	79114	1	1	1	D-glycerate	D-glycerate [ C3 H5 O4, tgt=47.87, overall=47.87 ]	(129.45792, 13979.758)(130.01077, 10246.716)(112.00134, 53417.055)(115.006454, 4335.49)	1.995
dhurrin	1	1	1	1132091	1083431	1064675	1	1	1	1	1	1	1	1	1	dhurrin	dhurrin [ C14 H17 N O7, tgt=69.16, overall=69.16 ]	(311.1237, 33250.918)(312.12656, 2160.2266)	5.355
dialurate	991229	1092639	1079974	1265681	1230485	1247575	1295514	1357577	1377094	1199857	1148840	1138801	1169377	1204434	1152928	dialurate	dialurate [ C4 H4 N2 O4, tgt=41.55, overall=41.55 ]	(130.01251, 10364.77)(145.02792, 14156.089)(128.01457, 138737.55)(129.01572, 18968.252)(154.00682, 3490.7212)	2.0036
digitoxigenin	224272	397617	397232	347265	333099	475303	185157	187208	182315	1201515	1110451	1206811	371443	385278	374953	digitoxigenin	digitoxigenin [ C23 H34 O4, tgt=34.46, overall=34.46 ]	(357.23462, 5449.18)(359.24896, 1589.425)(358.2537, 72771.67)(359.25583, 16171.442)(400.15936, 36267.254)(400.24606, 8260.015)(401.258, 3339.005)(379.22385, 12952.977)	5.0984
digitoxigenin 3-O-&beta;-D-quinovoside	265349	287587	551338	1	711861	752356	1221981	1224800	1208838	87949240	86511184	87769872	14324033	12224458	14395545	digitoxigenin 3-O-&beta;-D-quinovoside	digitoxigenin 3-O-&beta;-D-quinovoside [ C29H44O8, tgt= ]	(520.29926, 5117.58)(505.31412, 3683.2234)(521.5772, 417756.22)(522.5802, 104676.9)(523.3314, 14425.336)(543.8066, 12892.164)(527.7892, 27226.82)(526.28534, 10136.363)	12.6831
dihydroconiferyl alcohol glucoside	1	1	1	1	1	1	1572353	1601890	1544051	1108256	1169481	1161371	1	1	1	dihydroconiferyl alcohol glucoside	dihydroconiferyl alcohol glucoside [ C16 H24 O8, tgt= ]	(329.13666, 2369.48)(364.1903, 22284.758)(363.19327, 1850.7601)(346.1836, 3084.843)(354.13132, 9103.569)	5.7042
dihydrocoumarin	207436	219855	226607	1	1	1	1	1	1	1	1	1	202101	1	1	dihydrocoumarin	dihydrocoumarin [ C9 H8 O2, tgt= ]	(130.04462, 334.02335)(169.0912, 1674.72)(153.02771, 10322.553)	2.023
dihydrocurcumin	1	1	1	1	1	1	170950	176725	172833	1	1	1	1	1	1	dihydrocurcumin	dihydrocurcumin [ C21 H22 O6, tgt= ]	(370.1509, 8856.977)(390.18375, 16568.906)	6.274
dihydrogeranylgeranyl-PP	510050	562602	502133	1	1	1	1	1	1	112676	121381	1	1	1	1	dihydrogeranylgeranyl-PP	dihydrogeranylgeranyl-PP [ C20 H35 O7 P2, tgt= ]	(451.20132, 9162.39)(431.17273, 4747.58)(472.23425, 32821.355)(449.2212, 14686.163)(450.22232, 411.81668)	6.2495
dihydroisopteroate	1	1	1	1	1	1	5607275	5645813	5537829	2465721	2557175	2520892	3241116	3288329	3205917	dihydroisopteroate	dihydroisopteroate [ C14 H13 N6 O3, tgt=43.52, overall=43.52 ]	(316.1154, 1175.6866)	5.115
dihydromethanophenazine	474741	508218	1	418961	397184	380799	565420	566908	559857	420238	404934	399973	478570	473954	463168	dihydromethanophenazine	dihydromethanophenazine [ C37 H52 N2 O, tgt=58.66, overall=58.66 ]	(559.44763, 22544.688)(560.45, 2475.0796)	21.9062
dihydropapaverine	599262	603617	600486	5978623	5979168	570757	9212584	9477200	9380251	7605036	7642531	7305978	330882	759161	712971	dihydropapaverine	dihydropapaverine [ C20 H23 N O4, tgt=47.57, overall=47.57 ]	(343.17404, 5933.359)(345.43286, 3060.4375)(347.1765, 1804.86)(360.00046, 17647.188)(363.70273, 3360.58)(364.2074, 2477.31)(342.94052, 2559.7434)(344.19162, 1724.5834)(345.19952, 1044.125)(364.1454, 201.99)(348.43646, 3960.9143)	4.8982
dihydrosorgoleone	1813860	1997174	1877148	7178950	7099368	7163794	11570894	11848592	11846667	2283030	2391443	2173760	7630262	7333322	7759312	dihydrosorgoleone	dihydrosorgoleone [ C22 H32 O3, tgt=49.93, overall=49.93 ]	(344.23926, 90546.29)(345.24167, 8683.211)(346.23938, 134.925)(349.21655, 17741.166)	4.5754
dihydrosterculate	3000118	3025315	3133093	668406	1	1	1	1235269	1109083	155626	150184	151179	1793956	1759970	1851742	dihydrosterculate	dihydrosterculate [ C19 H35 O2, tgt=30.91, overall=30.91 ]	(297.283, 1333.15)(282.26834, 810151.0)(283.27103, 142741.95)(296.28296, 55379.523)(297.2862, 8076.3716)	17.2402
dihydroxyferuloyl-sinapoyl spermidine	1	1	1	1	1	1	362758	1163454	319460	214273	354143	336388	1	1	1	dihydroxyferuloyl-sinapoyl spermidine	dihydroxyferuloyl-sinapoyl spermidine [ C38 H45 N3 O12, tgt= ]	(739.29395, 5815.59)(740.29736, 1101.9451)(739.295, 75120.72)(740.2978, 23756.74)(741.2997, 2615.29)(754.3174, 12429.38)(755.3184, 3419.42)(735.9275, 9146.483)(736.9303, 929.21405)	6.56067
dihydroxyphaseic acid	950986	1668810	1826598	2439252	2446018	2461482	4714664	4872579	4984046	304798	6906218	294682	4584596	4603282	6165069	dihydroxyphaseic acid	dihydroxyphaseic acid [ C15 H21 O5, tgt=60.35, overall=60.35 ]	(281.13693, 3589.1523)(282.13235, 617.22)(263.1292, 43771.668)(264.13162, 2659.42)(286.27472, 6984.848)(287.15994, 7296.5713)(265.14594, 44663.38)(266.14862, 4234.35)(269.15082, 4265.205)(300.17874, 9526.11)(301.18155, 2933.56)(281.164, 859.82495)(306.13205, 2612.77)	4.35947
dihydrozeatin	1	1	1	1	1	1	899367	935820	858094	370606	381370	391824	1	1	1	dihydrozeatin	dihydrozeatin [ C10 H15 N5 O, tgt= ]	(226.14552, 2133.8733)(244.11888, 12656.949)(245.11833, 3890.2998)	3.115
dihydrozeatin-7-iN/i-glucose	241199	226202	144653	2403644	1531097	2418874	2196561	1	1	1	1	1	786452	784442	776611	dihydrozeatin-7-iN/i-glucose	dihydrozeatin-7-iN/i-glucose [ C16 H25 N5 O6, tgt=2.47, overall=2.47 ]	(366.1858, 16647.244)(367.18692, 891.91)(403.2196, 5140.92)(407.84705, 11307.775)(408.1837, 2337.4001)(391.1777, 52.07)	3.6878
dihydrozeatin-9-iN/i-glucoside	241199	226202	144653	2403644	1531097	2418874	2196561	1	1	1	1	1	786452	784442	776611	dihydrozeatin-9-iN/i-glucoside	dihydrozeatin-9-iN/i-glucoside [ C16 H25 N5 O6, tgt=2.47, overall=2.47 ]	(366.1858, 16647.244)(367.18692, 891.91)(403.2196, 5140.92)(407.84705, 11307.775)(408.1837, 2337.4001)(391.1777, 52.07)	3.6878
dihydrozeatin-9-iN/i-glucoside-iO/i-glucoside	1	1	1	476020	491997	495756	236972	241256	228807	4606071	4761144	4674917	185610	186711	194828	dihydrozeatin-9-iN/i-glucoside-iO/i-glucoside	dihydrozeatin-9-iN/i-glucoside-iO/i-glucoside [ C22 H35 N5 O11, tgt=28.34, overall=28.34 ]	(547.2416, 329.035)(528.2205, 11434.82)(529.2137, 4786.563)(563.2641, 91641.086)(564.26697, 11383.474)(545.25665, 8999.67)(546.2685, 1540.7567)	6.704
dihydrozeatin-iO/i-glucoside	241199	226202	144653	2403644	1531097	2418874	2196561	4221785	4138837	2029581	2057553	1998547	786452	784442	776611	dihydrozeatin-iO/i-glucoside	dihydrozeatin-iO/i-glucoside [ C16 H25 N5 O6, tgt=2.47, overall=2.47 ]	(389.1997, 920.605)(366.1858, 28860.607)(367.18695, 3917.052)(401.7216, 2804.0698)(385.20792, 2033.3734)(387.20667, 1076.2633)(407.43033, 8595.417)(408.1837, 2337.4001)(391.1777, 52.07)	3.67807
dimeric urushiol	245345	250743	253090	1	1	1	443678	442426	442533	345059	351162	347750	636535	648637	1345162	dimeric urushiol	dimeric urushiol [ C42 H58 O4, tgt= ]	(628.4367, 22491.4)(629.4394, 3728.9475)(612.9515, 855.8)(628.4394, 23189.35)(629.442, 8520.08)(630.4445, 544.82)(614.4572, 3912.4575)(615.4605, 1624.38)(644.4659, 9231.457)	13.8194
dimeric urushiol peroxide	1	1	1	1	1	1	1035005	1032607	999290	1	1	1	836904	792318	794626	dimeric urushiol peroxide	dimeric urushiol peroxide [ C42 H58 O6, tgt=58.85, overall=58.85 ]	(658.4467, 16447.455)(659.45123, 6490.2534)(682.41815, 52492.535)(683.4189, 15160.399)	12.051
dimethyl sulfone	160567	176354	1	1	1	1	1	1	1	1	1	1	1	1	1	dimethyl sulfone	dimethyl sulfone [ C2 H6 O2 S, tgt=17.85, overall=17.85 ]	(100.02045, 8755.82)(112.046, 7222.64)	2.328
dimethylallyl diphosphate	382657	436305	384288	880219	861154	819024	922541	947195	965828	728679	725812	742515	708483	727619	372474	dimethylallyl diphosphate	dimethylallyl diphosphate [ C5 H9 O7 P2, tgt=59.45, overall=59.45 ]	(225.97932, 26611.625)(226.98026, 1545.8014)(243.987, 1238.3375)(225.97784, 30971.844)(226.97842, 2044.1588)	1.9988
dimethylsulfonioacetate	3220880	1	2521183	162782	163120	378375	198665	1	889530	3780867	3341955	3070726	2803927	2732123	581456	dimethylsulfonioacetate	dimethylsulfonioacetate [ C4 H8 O2 S, tgt=42.77, overall=42.77 ]	(124.020004, 429.945)(125.03252, 2473.2039)(145.68224, 2254.8982)(130.0026, 17173.086)	1.02829
dimorphecolate	1	15862836	1	4459806	1	5690611	5155897	5295111	5159823	1	1	1	5802391	5738919	1	dimorphecolate	dimorphecolate [ C18 H31 O3, tgt=59.33, overall=59.33 ]	(318.72733, 4178.655)(319.2288, 56.62)(279.2197, 32414.385)(280.22275, 9214.97)(295.23303, 6262.265)(296.2439, 437.55)(316.27075, 1044.965)(296.5339, 46534.555)(297.53662, 4630.1313)(298.26138, 2473.24)(299.2657, 287.34)	14.0406
dipalmitoyl phosphatidate	2257585	2381434	2390736	273644	2227513	2140849	517548	507796	508545	2246741	2262831	2263951	637100	625839	612877	dipalmitoyl phosphatidate	dipalmitoyl phosphatidate [ C35 H67 O8 P, tgt=45.69, overall=45.69 ]	(649.4829, 1756.5967)(628.4341, 24616.256)(629.4368, 4025.1233)(652.4983, 5595.955)(635.4721, 2379.36)(666.9249, 5412.6865)(668.51843, 16446.695)(669.5208, 2778.0925)(648.6026, 6753.927)(648.4994, 1626.7734)(672.45807, 6312.4297)(673.46075, 971.00665)	20.0121
dipicolinate	1	92616	1	1	1	1	1	1	1	1	1	1	1	1	1	dipicolinate	dipicolinate [ C7 H3 N O4, tgt=43.60, overall=43.60 ]	(183.0435, 6523.6)(170.042, 730.37)	2.092
diprenylphlorisobutyrophenone	1	857335	989222	1	6534887	6106015	551495	581667	523163	1	1	4685288	206499	214387	1	diprenylphlorisobutyrophenone	diprenylphlorisobutyrophenone [ C20H27O4, tgt= ]	(331.5719, 7326.9863)(317.18814, 1000.09)(332.20416, 329.695)(349.2167, 14972.982)(336.17667, 37479.17)(337.179, 11797.583)	5.2884
diprenylphlorisovalerophenone	349332	406003	417361	3499555	1	118741	5743038	5897360	5693764	5020671	5195796	235253	3410821	3441089	3429720	diprenylphlorisovalerophenone	diprenylphlorisovalerophenone [ C21 H29 O4, tgt=50.31, overall=50.31 ]	(345.45056, 3462.536)(349.217, 54914.49)(329.36832, 7838.0728)(332.2011, 35333.35)(346.21793, 19598.666)(347.21997, 4608.7866)(328.2091, 2590.8699)(345.90628, 1167.3134)(371.20786, 10490.355)(372.2056, 1008.92334)(350.1905, 7384.1436)(351.18723, 182.68666)	4.76293
DL-norvaline	1	1	1	1	1	1	27812862	28524112	28479840	1	1	1	1	1	1	DL-norvaline	DL-norvaline [ C5 H11 N O2, tgt= ]	(118.08096, 360782.84)(119.08407, 9395.76)	2.6322
D-mannitol 1-phosphate	299186	318449	308998	441246	441748	421648	487713	485010	495431	359290	363455	359198	331691	331445	323138	D-mannitol 1-phosphate	D-mannitol 1-phosphate [ C6 H13 O9 P, tgt=13.54, overall=13.54 ]	(264.06622, 4503.716)(265.00504, 28990.889)(266.00616, 5806.993)	1.997
d-NADH	1	1	1	1	1	1	1	1	1	1	1	1	1	1	574436	d-NADH	d-NADH [ C21 H25 N6 O15 P2, tgt= ]	(687.1469, 176.1)(664.1213, 163.83)	18.9096
D-nopaline	728681	811835	833729	742659	755317	736357	379239	389985	368974	3313863	3246347	3280671	213588	209000	215510	D-nopaline	D-nopaline [ C11 H19 N4 O6, tgt=80.24, overall=80.24 ]	(303.73236, 12593.489)(304.13913, 1047.3433)(285.12137, 26574.334)(286.12695, 3852.2598)(306.14572, 1300.38)(322.1713, 41887.336)(323.17477, 6823.971)(303.658, 9672.622)(305.1664, 1073.63)(329.1359, 17227.398)	2.7802
docosanedioate	1	1	1	1552419	1552381	1283082	1	1	1	1	1	1	1	1	1	docosanedioate	docosanedioate [ C22 H40 O4, tgt=12.42, overall=12.42 ]	(373.2612, 24932.357)(374.26392, 1337.1466)	2.855
D-octopine	2724821	2875983	2939931	2956272	2686716	2682888	1321510	1	1311107	2287279	2321826	2347181	1121331	1140137	1154909	D-octopine	D-octopine [ C9 H18 N4 O4, tgt=71.97, overall=71.97 ]	(246.1361, 29137.69)(247.13533, 1241.151)(248.1487, 210.13)(233.1396, 73160.445)(234.14275, 3353.7432)(253.11124, 17731.574)(255.12593, 1047.7134)	2.506
D-phenylalanine	1	1	1	1	1	1	1	1	1	2180118	2155583	2071979	1	1	1	D-phenylalanine	D-phenylalanine [ C9H11NO2, tgt= ]	(166.07869, 9554.236)(185.12013, 87.23)	2.845
D-proline	203685	220135	218996	1	1	1	1	1	1	626005	615028	608171	1	1	1	D-proline	D-proline [ C5 H9 N O2, tgt=42.40, overall=42.40 ]	(118.070915, 54864.254)(120.07617, 97216.875)(121.0792, 2736.7668)(138.049, 11173.055)	2.63467
D-sorbitol 6-phosphate	299186	318449	308998	441246	441748	421648	487713	485010	495431	359290	363455	359198	331691	331445	323138	D-sorbitol 6-phosphate	D-sorbitol 6-phosphate [ C6 H13 O9 P, tgt=13.54, overall=13.54 ]	(264.06622, 4503.716)(265.00504, 28990.889)(266.00616, 5806.993)	1.997
D-tartrate	1	1	1	106072	102671	112097	94480	92142	94175	97020	87707	89654	1	1	1	D-tartrate	D-tartrate [ C4 H4 O6, tgt=51.83, overall=51.83 ]	(130.99191, 7257.534)(132.56352, 1157.4598)(133.99516, 2141.7134)(168.04309, 32738.352)(169.0441, 2460.7444)(170.04108, 857.52454)(151.02888, 181127.97)(152.0302, 21325.96)(157.99557, 3122.0652)	2.066
ecdysone	2789288	2783711	2829092	789298	771309	759805	5027946	5004003	5028839	1792111	1828146	1809516	6292331	6352380	6307926	ecdysone	ecdysone [ C27 H44 O6, tgt=47.72, overall=47.72 ]	(465.3224, 4834.3525)(482.34842, 119578.25)(483.3512, 20733.56)(484.35403, 2479.0466)(487.30347, 9551.908)(488.30725, 581.48663)	10.9442
ecdysone 22-phosphate	107644	113572	811606	1517209	1526539	1596215	10819652	10551058	10182770	440482	388181	407754	1148485	1129544	1133218	ecdysone 22-phosphate	ecdysone 22-phosphate [ C27 H43 O9 P, tgt=45.56, overall=45.56 ]	(546.2764, 1904.88)(527.5176, 6987.3374)(526.253, 4175.79)(543.7802, 11462.828)(545.2849, 1939.3751)(530.27686, 2405.075)(531.2764, 108.06)(560.28284, 6059.5)(543.89825, 76056.664)(544.9005, 15514.389)(544.2963, 1331.63)(568.58673, 9644.03)(567.24884, 3382.3035)(547.23914, 501.035)	4.88307
ecgonine methyl ester	1	1	1	1	1	1	1	1	1	1	1	1	1	1	201161	ecgonine methyl ester	ecgonine methyl ester [ C10 H18 N O3, tgt= ]	(203.1303, 245.81)(201.1388, 8265.41)	4.046
echinatin	1	1	1	1	1	1	1	1	1	1	1	1	1225860	1203696	1209268	echinatin	echinatin [ C16 H14 O4, tgt= ]	(252.08484, 40955.496)(253.08636, 963.79663)	6.298
EDTA	1	1	1	1	1	1	1	1	1	4415309	4513101	4587086	1	1	1	EDTA	EDTA [ C10 H13 N2 O8, tgt= ]	(271.04932, 127867.836)(272.05197, 10226.36)	9.4118
EHNA	2702698	2839688	2867612	6627565	6629598	6569833	1	1056264	1	1780710	1770582	1810832	1549193	1550940	1445316	EHNA	EHNA [ C14 H23 N5 O, tgt=76.50, overall=76.50 ]	(260.18698, 43392.09)(261.18997, 1859.93)(295.23163, 6290.37)(279.21936, 76645.02)(280.22275, 11336.316)(300.17957, 19784.133)(301.18152, 3822.1602)	7.12
eicosatetraenoate	1	1	1	1470839	1455199	1432913	363756	1	355705	1	1	1	1	1	1	eicosatetraenoate	eicosatetraenoate [ C20 H31 O2, tgt=34.31, overall=34.31 ]	(308.20776, 52493.49)(309.21042, 4378.3896)	7.88136
emindole-SB	1	1	1	1	1	1	302619	304823	291004	1	4714508	4514204	1	1	1	emindole-SB	emindole-SB [ C28 H39 N O, tgt= ]	(428.69598, 49946.71)(430.2906, 14447.07)(411.27512, 3105.89)	5.562
enol-oxaloacetate	214203	224562	241962	304306	297975	364173	342467	340246	356930	333358	325317	333430	293052	295780	301379	enol-oxaloacetate	enol-oxaloacetate [ C4 H2 O5, tgt=37.63, overall=37.63 ]	(130.99219, 4466.563)(132.9932, 1013.78894)(133.99516, 1709.2533)(112.98228, 3503.9763)(151.02937, 154854.6)(152.03055, 17648.334)(130.01157, 10451.677)(157.99553, 19798.523)	2.0476
enterobactin	356931	408857	294136	439273	357483	358808	588245	598945	592212	452160	439970	447078	686090	638285	647926	enterobactin	enterobactin [ C30 H27 N3 O15, tgt=59.39, overall=59.39 ]	(689.1867, 6490.701)(669.1718, 11096.723)(670.17413, 1540.6758)	23.4876
epoxypseudoisoeugenol-2-methylbutyrate	1	1	1	14839510	14524781	14278668	12766376	13144110	13346178	9069664	9248635	9109613	11016858	11192076	11398338	epoxypseudoisoeugenol-2-methylbutyrate	epoxypseudoisoeugenol-2-methylbutyrate [ C15 H20 O4, tgt=61.62, overall=61.62 ]	(264.13245, 3314.2708)(251.1386, 2781.0945)(265.14313, 166457.38)(266.14587, 14790.005)	3.6936
ergothioneine	1	489907	1	1	1	1	1	1	1	1	1	1	1194083	1	1185628	ergothioneine	ergothioneine [ C9 H15 N3 O2 S, tgt=19.71, overall=19.71 ]	(234.0998, 503.32)(247.1206, 9312.48)(248.1154, 498.28)(252.0849, 40726.254)(253.08646, 975.845)	4.65133
erythromycin A	1	1	1	1	186846	1	579608	563686	582996	792111	807096	798143	513332	494043	477584	erythromycin A	erythromycin A [ C37 H68 N O13, tgt=45.57, overall=45.57 ]	(740.4864, 8773.85)(739.4465, 38905.883)(740.44775, 4395.5728)(734.4937, 13924.269)(735.4966, 2104.8267)	11.0039
erythromycin B	1008758	1054036	1040753	1420910	1295003	1222108	2160907	2213262	2190000	1	1	627251	1953167	720972	726013	erythromycin B	erythromycin B [ C37 H68 N O12, tgt=42.03, overall=42.03 ]	(702.4701, 311.63)(701.4903, 2189.9065)(737.8399, 14004.293)(737.50024, 4731.2827)(719.4262, 19518.875)(719.94995, 6240.708)(722.4951, 1029.74)(723.4527, 262.87)	14.9935
erythromycin C	1	1	1	1304945	1324385	1365941	366791	1	377667	360520	363323	362637	1	1	1	erythromycin C	erythromycin C [ C36 H66 N O13, tgt=18.36, overall=18.36 ]	(720.47656, 10636.66)(721.4791, 833.99)(725.4211, 35115.95)(726.4256, 10124.767)	8.171
erythromycin D	677209	681925	711809	1	1	1	1765598	1736060	1712000	1	1	1	1392258	1418504	1409872	erythromycin D	erythromycin D [ C36 H66 N O12, tgt=61.23, overall=61.23 ]	(704.4861, 26488.566)(705.4888, 5520.708)	11.1063
esculetin	1059102	1133389	1157466	1	1	1	1013075	1055186	1046478	1	1	1	462505	473007	447480	esculetin	esculetin [ C9 H6 O4, tgt=49.62, overall=49.62 ]	(161.0223, 30440.688)(162.02364, 966.97675)(163.01958, 691.01)(183.04347, 2190.0984)(161.02318, 24526.416)(162.0248, 1445.7267)(163.02116, 830.8867)	2.22567
estrone	12847309	13459380	13787065	10150649	9423197	9318447	10944012	11390460	1	5650982	5651063	5824567	3052188	3081820	3052930	estrone	estrone [ C18 H22 O2, tgt=47.60, overall=47.60 ]	(273.72836, 8707.812)(254.15044, 7354.25)(274.17603, 15019.181)(288.1911, 150698.78)(289.19357, 10950.453)(270.18088, 15022.125)(271.1815, 206.19)(295.15274, 36559.63)(296.15536, 3196.4993)(276.1518, 6183.55)	2.3916
etheroleate	7174679	7414453	7318749	2500215	2415936	2063807	2329480	2286008	2270406	618581	1	605350	3747465	3644194	3818412	etheroleate	etheroleate [ C18 H29 O3, tgt=65.39, overall=65.39 ]	(295.2136, 744.37)(277.20508, 12684.405)(279.0937, 4794.89)(295.2306, 4919.54)(278.5476, 231951.31)(279.55063, 27139.814)(279.2193, 59504.49)(280.2232, 5714.38)(294.6627, 91270.93)(295.69968, 11860.707)(296.24652, 64168.305)(297.25037, 9766.179)(316.2098, 11751.653)	13.772
ethyl-(2R)-methyl-(3S)-hydroxybutanoate	218752	251143	227575	1	1	1	1	1	1	1	1	1	1	1	1	ethyl-(2R)-methyl-(3S)-hydroxybutanoate	ethyl-(2R)-methyl-(3S)-hydroxybutanoate [ C7 H14 O3, tgt=73.63, overall=73.63 ]	(146.09038, 7168.27)(148.10652, 173226.11)(149.10927, 9650.081)	4.296
eudesmol, bisabolol, etc	1	1	146086	1	1	1	1	1	1	1	1	1	1	1	1	eudesmol, bisabolol, etc	eudesmol, bisabolol, etc [ C15 H26 O, tgt= ]	(226.2084, 10185.26)	14.9653
eugenyl 6-iO/i-&beta;-iD/i-xylopyranosyl-&beta;-iD/i-glucopyranoside	1	1	1	1	1	1	12955511	13027517	13031917	1	144554	1	1	1	1	eugenyl 6-iO/i-&beta;-iD/i-xylopyranosyl-&beta;-iD/i-glucopyranoside	eugenyl 6-iO/i-&beta;-iD/i-xylopyranosyl-&beta;-iD/i-glucopyranoside [ C21 H30 O11, tgt= ]	(443.1726, 1199.32)(479.97263, 90213.39)(480.89438, 25765.146)(481.2221, 141465.48)(482.2246, 34091.62)(459.2073, 5273.96)	8.219
eupatolitin	124308	119333	127248	1	1	1	1	1	1	1	1	1	1	1	1	eupatolitin	eupatolitin [ C17 H13 O8, tgt=14.05, overall=14.05 ]	(365.09207, 17401.56)(366.09506, 801.2134)(345.0903, 8127.6304)	2.05
FAD	193674	207785	305895	111904	158885	188688	225147	220312	225531	214714	204243	206477	216033	216589	213329	FAD	FAD [ C27 H30 N9 O15 P2, tgt=11.71, overall=11.71 ]	(807.11017, 13631.6)(792.10706, 79736.57)(793.1083, 8819.37)	22.7704
fagopyritol A2	1	1	1	1	1	1	1	1	1	215200	223534	218856	1	1	1	fagopyritol A2	fagopyritol A2 [ C18 H32 O16, tgt= ]	(522.1939, 13239.421)(523.19684, 1247.8467)	8.316
fagopyritol A3	4445448	4544488	4374094	1	1	1	1	1	1	1	1	1	1	1	1	fagopyritol A3	fagopyritol A3 [ C24 H42 O21, tgt= ]	(667.26715, 108654.96)(668.2696, 26087.703)(669.2715, 1920.0668)	5.6596
fagopyritol B2	1	1	1	1	1	1	1	1	1	215200	223534	218856	1	1	1	fagopyritol B2	fagopyritol B2 [ C18 H32 O16, tgt= ]	(522.1939, 13239.421)(523.19684, 1247.8467)	8.316
fagopyritol B3	4445448	4544488	4374094	1	1	1	1	1	1	1	1	1	1	1	1	fagopyritol B3	fagopyritol B3 [ C24 H42 O21, tgt= ]	(667.26715, 108654.96)(668.2696, 26087.703)(669.2715, 1920.0668)	5.6596
ferric (2,3-dihydroxybenzoylserine)sub3/sub	449687	492619	502353	370907	347746	346488	429771	418595	427116	412093	388764	414652	126006	438552	123471	ferric (2,3-dihydroxybenzoylserine)sub3/sub	ferric (2,3-dihydroxybenzoylserine)sub3/sub [ C30 H23 Fe N3 O16, tgt=39.44, overall=39.44 ]	(737.2762, 5910.7134)(736.2922, 4175.85)(720.51654, 2643.4233)(725.0512, 9150.668)(743.0547, 2121.41)(720.7139, 4490.8433)(754.071, 5611.299)(755.15106, 2380.56)(735.28577, 8201.8125)(738.71924, 848.8467)(765.06244, 4314.8516)(766.0678, 1665.505)	22.4717
ferric enterobactin complex	3048608	3159000	687076	3033877	2933570	2844193	3853714	3841102	3751491	3336327	3278447	3278507	3950442	4013514	3975388	ferric enterobactin complex	ferric enterobactin complex [ C30 H21 Fe N3 O15, tgt=45.91, overall=45.91 ]	(705.0351, 2045.1102)(706.03766, 2851.875)(720.0529, 64023.36)(721.0522, 6415.2783)(705.0534, 33037.78)(706.0549, 2331.1)(707.0288, 3412.66)(708.0301, 298.7)(735.0563, 4248.339)(740.05646, 4091.0383)(741.997, 10047.38)(742.0654, 14199.26)	22.0212
ferruginol	1	1	1	143126	1	1	1	1	1	1	1	1	1	1	1	ferruginol	ferruginol [ C20 H30 O, tgt=45.81, overall=45.81 ]	(309.2098, 8821.06)(292.2124, 319.25)	9.12
ferulate	1	1	1	1	1	1	327851	342109	328745	1	1	1	1	1	1	ferulate	ferulate [ C10 H9 O4, tgt= ]	(175.03743, 15388.863)(203.04353, 921.5967)	2.296
feruloylagmatine	1	1	1	542090	536351	535036	1	1682420	1615865	1	1	1	1	1	1	feruloylagmatine	feruloylagmatine [ C15 H23 N4 O3, tgt=42.34, overall=42.34 ]	(307.1711, 1484.7933)(290.1742, 1963.2451)(308.17923, 9564.316)(330.22244, 15425.158)	4.07
feruloylserotonin	1	1	1	531433	534366	686793	1523600	1562948	1557413	465979	488833	471781	1	1	1	feruloylserotonin	feruloylserotonin [ C20 H20 N2 O4, tgt=17.68, overall=17.68 ]	(354.65637, 11891.241)(353.15088, 920.43335)(338.15555, 2387.0134)(352.17093, 14196.188)(353.1735, 260.17)	4.8352
FK-506	1	1	1	1	1	1299247	1	1	1	3721782	771622	3453113	1	1	1	FK-506	FK-506 [ C44 H69 N O12, tgt=34.68, overall=34.68 ]	(804.51654, 13852.373)(805.51935, 3122.0947)	26.9717
FMNHSUB2/SUB	1367976	1472526	1326854	3409298	3387250	3362081	254328	254230	244047	1405250	1379330	1395749	1060795	1036234	1083906	FMNHSUB2/SUB	FMNHSUB2/SUB [ C17 H21 N4 O9 P, tgt=45.28, overall=45.28 ]	(440.1082, 1488.9066)(442.11935, 7031.697)(456.13596, 49783.12)(457.13907, 9733.6045)	12.4634
formyl-CoA	4386056	4535614	4615291	4786832	4643044	4575048	5427593	5297008	5233362	4915126	4875389	4896641	5329338	5295011	5223084	formyl-CoA	formyl-CoA [ C22 H32 N7 O17 P3 S, tgt=53.40, overall=53.40 ]	(794.0809, 4549.18)(778.09015, 1268.704)(792.1072, 91763.49)(793.1085, 9517.966)(812.1101, 3672.2217)(813.78296, 9151.037)(814.12067, 13504.114)(792.1066, 87642.26)(793.108, 9141.63)(794.0871, 7007.3867)(795.0882, 1661.7866)	22.873
fumarate	1	1	1	96895	1	1	1	1	1	1	1	1	1	1	1	fumarate	fumarate [ C4 H2 O4, tgt=26.51, overall=26.51 ]	(120.0179, 3611.47)(122.9852, 2691.17)	1.995
furcatin	1	1	1	1	1	1173917	1	1	1	1	1	1	1	1	1	furcatin	furcatin [ C20 H28 O10, tgt=12.96, overall=12.96 ]	(428.1627, 822.76)(428.1967, 339.17)	9.917
fusicocca-2,10(14)-diene	319766	360653	330787	1	1	1	1	1	1	1	1	1	1	1	1	fusicocca-2,10(14)-diene	fusicocca-2,10(14)-diene [ C20 H32, tgt= ]	(295.23553, 21282.799)(296.24646, 684.85333)	13.4055
fusidate	1	1	1	10792061	10753544	10985873	1456727	1468885	1394204	42983076	42204360	42785960	3103801	2308181	3051947	fusidate	fusidate [ C31 H47 O6, tgt=76.56, overall=76.56 ]	(520.49664, 294322.47)(521.32, 87596.91)(522.3215, 12943.8)(516.3501, 35052.938)(517.3528, 4307.3)	14.7285
galactitol 1-phosphate	299186	318449	308998	441246	441748	421648	487713	485010	495431	359290	363455	359198	331691	331445	323138	galactitol 1-phosphate	galactitol 1-phosphate [ C6 H13 O9 P, tgt=13.54, overall=13.54 ]	(264.06622, 4503.716)(265.00504, 28990.889)(266.00616, 5806.993)	1.997
geissoschizine	1	1	1	4041636	4055169	4047850	1	1	1	1	1	1	1	1	1	geissoschizine	geissoschizine [ C21 H24 N2 O3, tgt=47.23, overall=47.23 ]	(352.16907, 1052.9834)(334.15994, 68475.29)(335.16232, 6005.6934)(371.2089, 4301.2935)(373.22574, 10166.793)(379.17834, 1015.95)	2.962
genkwanin	1	1	1	1	1	1	1	1	1	2859638	2884991	2933708	1	1	1	genkwanin	genkwanin [ C16 H12 O5, tgt= ]	(285.06412, 101108.93)(286.06693, 8111.5034)	8.3818
gentisate	12682387	9627767	1	16980954	7099436	10672721	9311550	7993176	5072610	7991604	4221399	1	6434687	6269427	7026084	gentisate	gentisate [ C7 H5 O4, tgt=47.54, overall=47.54 ]	(138.02159, 604.6715)(157.99664, 79276.805)	0.359538
geranyl 6-iO/i-&beta;-iD/i-xylopyranosyl-&beta;-iD/i-glucopyranoside	2137476	2125517	2100375	1	1	1	1	1	1	1	1	1	1618170	1	1	geranyl 6-iO/i-&beta;-iD/i-xylopyranosyl-&beta;-iD/i-glucopyranoside	geranyl 6-iO/i-&beta;-iD/i-xylopyranosyl-&beta;-iD/i-glucopyranoside [ C21H36O10, tgt= ]	(451.247, 24142.07)(452.2498, 2356.78)(432.7282, 5417.795)(433.9784, 2623.4675)(434.2271, 761.35)(470.2754, 89.38)(449.2584, 75318.86)(450.26065, 11235.23)(474.2157, 596.73)(455.22, 1191.37)	3.5924
geranyl acetate	1300222	1419826	1390608	1	1	1	1	1	1	1269155	1976466	2509188	1556275	1548789	1793335	geranyl acetate	geranyl acetate [ C12 H20 O2, tgt= ]	(203.13104, 78344.71)(204.13391, 2515.152)	2.5444
geranyl monophosphate	1	1	1	1	1	1	1	1	1	1508643	1353993	1506409	1	1	1	geranyl monophosphate	geranyl monophosphate [ C10 H17 O4 P, tgt= ]	(250.12599, 22031.143)(251.13887, 1804.9233)	2.8864
geranylfarnesyl diphosphate	715134	823987	464966	1	1	1	1244404	1175822	1124613	1802752	1775077	1183729	324042	318770	325820	geranylfarnesyl diphosphate	geranylfarnesyl diphosphate [ C25 H41 O7 P2, tgt=54.80, overall=54.80 ]	(518.2412, 370.57333)(497.2162, 9606.876)(498.2209, 4135.7)(502.2325, 15610.673)(501.23203, 4685.153)(534.26715, 6095.7485)(536.2753, 52049.6)(537.2771, 1705.58)(516.5464, 14421.97)(517.26337, 1078.7883)(521.2173, 71648.24)(522.2198, 14075.66)	6.68733
geranylgeranyl diphosphate	1	1	1	1	1	1	1	1	1	1	1	1	848485	883045	842607	geranylgeranyl diphosphate	geranylgeranyl diphosphate [ C20 H33 O7 P2, tgt= ]	(465.19846, 14791.837)(466.20035, 276.93668)	6.17367
geranylhydroquinone	60273096	60983708	60137540	2801934	2711724	2728134	606099	622596	611227	953481	937826	953970	3629259	3623117	3514247	geranylhydroquinone	geranylhydroquinone [ C16 H22 O2, tgt=31.95, overall=31.95 ]	(246.67004, 339076.28)(248.17456, 91892.07)(231.1652, 257.38)(231.16066, 195381.14)(232.16328, 13767.134)(249.18744, 4494133.5)(250.19057, 745179.94)(251.1931, 49306.793)(269.14926, 34911.26)(270.152, 2541.9402)(251.13918, 11425.208)	2.7356
germacra-1(10),4,11(13)-trien-12-oate	5606878	5909051	5814100	1	1	1	1	1	1	1	1	1	1	1	1	germacra-1(10),4,11(13)-trien-12-oate	germacra-1(10),4,11(13)-trien-12-oate [ C15 H21 O2, tgt=18.25, overall=18.25 ]	(235.17116, 2976.9465)(251.19316, 75915.12)(252.19518, 540.1233)(240.143, 1706.8066)	3.963
germacra-1(10),4,11(13)-trien-12-ol	232499	234688	238314	1	1	1	1	1	1	1	1	1	1	1	1	germacra-1(10),4,11(13)-trien-12-ol	germacra-1(10),4,11(13)-trien-12-ol [ C15 H24 O, tgt=28.52, overall=28.52 ]	(221.19293, 9531.99)(245.17613, 3018.9534)	2.504
gibberellin Asub1/sub	1422595	1499267	1398321	1	1	1	1	1	1	1	1	1	1	1	1	gibberellin Asub1/sub	gibberellin Asub1/sub [ C19H23O6, tgt= ]	(352.17258, 446.77)(329.13675, 21073.428)(330.1405, 961.2834)(331.15524, 130.025)(366.19565, 7031.9336)	2.7536
gibberellin Asub110/sub	1059736	1122755	1048568	2191343	2085539	2174797	1000407	544057	788004	89522	4895232	4053483	505596	486380	414245	gibberellin Asub110/sub	gibberellin Asub110/sub [ C20 H26 O5, tgt=47.55, overall=47.55 ]	(350.19095, 4065.7556)(350.19217, 32968.375)(351.1964, 7522.4897)(364.20645, 25037.764)(365.2112, 4743.956)(348.71317, 27215.502)(348.2049, 402.84)(372.17325, 3572.7766)	4.8584
gibberellin Asub12/sub	492390	525733	505170	3570329	3540361	3609929	576518	178765	168388	255114	1	261354	1	1	1	gibberellin Asub12/sub	gibberellin Asub12/sub [ C20 H26 O4, tgt=47.52, overall=47.52 ]	(330.18787, 7210.793)(331.18326, 235.06201)(316.17795, 657.22)(332.202, 17249.639)(318.1878, 6214.541)(332.2041, 13583.588)(355.6853, 4624.0776)(336.36478, 2040.044)	3.281
gibberellin Asub12/sub-aldehyde	1	1	1	592515	1	324416	797689	852817	874012	1	1	1	639362	719940	636872	gibberellin Asub12/sub-aldehyde	gibberellin Asub12/sub-aldehyde [ C20 H27 O3, tgt=12.44, overall=12.44 ]	(316.21103, 25769.158)(317.2144, 1007.5683)(318.22644, 10463.032)(320.24188, 4810.3496)	13.7238
gibberellin Asub13/sub	1	1	1	1	1	1	1	700685	379182	723532	775134	949990	1	1	1	gibberellin Asub13/sub	gibberellin Asub13/sub [ C20H23O7, tgt= ]	(359.1527, 98.04)(394.18036, 125106.2)(395.18265, 15740.658)	5.0215
gibberellin Asub14/sub	1059736	1122755	1048568	2191343	2085539	2174797	1000407	544057	788004	89522	4895232	4053483	505596	486380	414245	gibberellin Asub14/sub	gibberellin Asub14/sub [ C20 H26 O5, tgt=47.55, overall=47.55 ]	(350.19095, 4065.7556)(350.19217, 32968.375)(351.1964, 7522.4897)(364.20645, 25037.764)(365.2112, 4743.956)(348.71317, 27215.502)(348.2049, 402.84)(372.17325, 3572.7766)	4.8584
gibberellin Asub14/sub-aldehyde	1	857335	989222	2269348	6534887	6106015	551495	581667	523163	755317	329728	4685288	206499	214387	1	gibberellin Asub14/sub-aldehyde	gibberellin Asub14/sub-aldehyde [ C20 H27 O4, tgt=26.53, overall=26.53 ]	(331.46585, 5464.5103)(317.78763, 3198.9202)(332.2032, 12936.377)(317.20337, 941.925)(349.2167, 14972.982)(331.2209, 2172.98)(357.19226, 507.135)(336.54086, 34082.484)(337.179, 11797.583)	4.743
gibberellin Asub15/sub (closed lactone form)	492390	525733	505170	938913	348696	920875	2705945	2779634	2713901	514303	551243	522168	251887	268684	242119	gibberellin Asub15/sub (closed lactone form)	gibberellin Asub15/sub (closed lactone form) [ C20 H25 O4, tgt=33.69, overall=33.69 ]	(330.18704, 4236.235)(331.1822, 773.55)(316.1712, 16563.42)(330.18924, 9348.394)(316.17795, 657.22)(347.20068, 3575.795)(332.47165, 16989.742)(333.20584, 224.46667)(352.17215, 13028.284)(353.1735, 167.78334)(336.16385, 1143.4551)	3.54327
gibberellin Asub15/sub (open lactone form)	1059736	1122755	1048568	2191343	2085539	2174797	1000407	544057	788004	89522	4895232	4053483	505596	486380	414245	gibberellin Asub15/sub (open lactone form)	gibberellin Asub15/sub (open lactone form) [ C20 H26 O5, tgt=47.55, overall=47.55 ]	(350.19095, 4065.7556)(350.19217, 32968.375)(351.1964, 7522.4897)(364.20645, 25037.764)(365.2112, 4743.956)(348.71317, 27215.502)(348.2049, 402.84)(372.17325, 3572.7766)	4.8584
gibberellin Asub17/sub	1	1	1	1	1	1	1	700685	379182	723532	775134	949990	1	1	1	gibberellin Asub17/sub	gibberellin Asub17/sub [ C20H23O7, tgt= ]	(359.1527, 98.04)(394.18036, 125106.2)(395.18265, 15740.658)	5.0215
gibberellin Asub20/sub	1	1	1	3738038	3730627	3718065	6099014	6135181	5996166	2659010	2761748	2737157	3554838	3608398	3515516	gibberellin Asub20/sub	gibberellin Asub20/sub [ C19 H23 O5, tgt=55.03, overall=55.03 ]	(335.3378, 13285.5205)(313.14084, 91312.164)(314.1437, 9205.126)(336.17667, 100125.305)(337.1791, 11992.433)(350.19083, 13779.013)(351.1902, 125.925)(359.1527, 126.74)	5.4812
gibberellin Asub24/sub	1	1	1	1	1	1	1386848	1403410	1375160	701597	662610	666178	188313	191113	189472	gibberellin Asub24/sub	gibberellin Asub24/sub [ C20 H24 O5, tgt= ]	(326.15195, 23734.576)(350.1915, 6127.197)(363.53046, 16310.12)(363.19327, 2515.3733)(347.2037, 152321.2)(348.20557, 6729.7534)	5.1788
gibberellin Asub25/sub	1	1	1	1624970	1538229	1512976	1	1	1	1	1	1	1	1	1	gibberellin Asub25/sub	gibberellin Asub25/sub [ C20 H23 O6, tgt=59.79, overall=59.79 ]	(377.18103, 1757.2267)(359.17197, 61652.582)(360.17468, 5109.9863)	9.4869
gibberellin Asub28/sub	383982	386071	397192	1	1	1	1	1	1	1	1	1	755991	670143	759146	gibberellin Asub28/sub	gibberellin Asub28/sub [ C20 H23 O8, tgt= ]	(392.14493, 29005.033)(393.14755, 2646.57)(409.17105, 21315.357)(410.17798, 2325.5833)	12.069
gibberellin Asub29/sub	1422595	1499267	1398321	1	1	1	1	1	1	1	1	1	1	1	1	gibberellin Asub29/sub	gibberellin Asub29/sub [ C19H23O6, tgt= ]	(352.17258, 446.77)(329.13675, 21073.428)(330.1405, 961.2834)(331.15524, 130.025)(366.19565, 7031.9336)	2.7536
gibberellin Asub34/sub	1422595	1499267	1398321	2652581	2679903	2769978	408326	434211	408054	1	1	1	309735	299682	329396	gibberellin Asub34/sub	gibberellin Asub34/sub [ C19 H23 O6, tgt=42.66, overall=42.66 ]	(351.1644, 818.4932)(352.17038, 1656.9116)(329.13583, 22189.107)(330.13843, 1914.8468)(331.15524, 130.025)(331.1446, 5303.0)(334.1596, 58809.95)(335.1619, 5061.44)(366.18808, 25219.018)(367.18704, 3534.173)(350.19028, 522.58)(354.13126, 21807.248)	3.602
gibberellin Asub36/sub	1	1	1	246091	218772	201176	1	1	1	248853	521209	374753	2732584	2746241	2731341	gibberellin Asub36/sub	gibberellin Asub36/sub [ C20 H24 O6, tgt=47.60, overall=47.60 ]	(365.61322, 8547.765)(366.1888, 5281.22)(348.16177, 1145.4)(380.1995, 6387.2466)(361.43634, 16635.688)(361.17874, 3782.5667)	4.5542
gibberellin Asub37/sub	1063817	1098835	1059108	770356	758621	754029	10308988	10267963	5207113	1	1	1	616301	627605	623086	gibberellin Asub37/sub	gibberellin Asub37/sub [ C20 H26 O6, tgt=42.30, overall=42.30 ]	(366.18716, 25142.625)(367.18692, 8305.687)(350.1907, 21486.523)(380.20114, 40074.43)(381.2041, 7286.8325)(363.0315, 9324.538)(363.19327, 1814.3866)(386.155, 108.49)	5.1988
gibberellin Asub37/sub (closed lactone form)	1	478706	294748	510453	485329	336509	1	1	1	577351	597673	922898	929006	1091606	927939	gibberellin Asub37/sub (closed lactone form)	gibberellin Asub37/sub (closed lactone form) [ C20 H25 O5, tgt=47.62, overall=47.62 ]	(346.97803, 3021.816)(346.68073, 3142.4402)(331.18298, 3240.4773)(332.1686, 70.86)(368.21362, 103.006676)(345.1995, 8849.6455)(371.17783, 1241.7233)(350.40875, 866.4825)	2.85743
gibberellin Asub38/sub	271496	330780	242671	150921	108740	107082	985597	452128	320553	1	1	1	276729	284116	275378	gibberellin Asub38/sub	gibberellin Asub38/sub [ C20 H25 O6, tgt=7.25, overall=7.25 ]	(366.18564, 27610.24)(365.17746, 6922.5566)(347.17834, 1440.9899)(379.86484, 58056.758)(381.2029, 20810.607)(362.43448, 3766.0442)	4.1768
gibberellin Asub4/sub	1	1	1	3738038	3730627	3718065	6099014	6135181	5996166	2659010	2761748	2737157	3554838	3608398	3515516	gibberellin Asub4/sub	gibberellin Asub4/sub [ C19 H23 O5, tgt=55.03, overall=55.03 ]	(335.3378, 13285.5205)(313.14084, 91312.164)(314.1437, 9205.126)(336.17667, 100125.305)(337.1791, 11992.433)(350.19083, 13779.013)(351.1902, 125.925)(359.1527, 126.74)	5.4812
gibberellin Asub43/sub	383982	386071	397192	1	1	1	1	1	1	1	1	1	755991	670143	759146	gibberellin Asub43/sub	gibberellin Asub43/sub [ C20 H23 O8, tgt= ]	(392.14493, 29005.033)(393.14755, 2646.57)(409.17105, 21315.357)(410.17798, 2325.5833)	12.069
gibberellin Asub44/sub (closed lactone form)	1	478706	294748	510453	485329	336509	274733	279978	267885	577351	597673	922898	929006	1091606	927939	gibberellin Asub44/sub (closed lactone form)	gibberellin Asub44/sub (closed lactone form) [ C20 H25 O5, tgt=47.62, overall=47.62 ]	(348.18262, 4327.076)(347.49057, 3917.8403)(331.18298, 3240.4773)(332.1686, 70.86)(368.21362, 103.006676)(345.1995, 8849.6455)(370.6681, 1742.4369)(351.15448, 1242.427)	3.55279
gibberellin Asub46/sub	337259	304719	327035	2155073	2142368	2133462	403845	700685	379182	723532	775134	949990	1	1	1	gibberellin Asub46/sub	gibberellin Asub46/sub [ C20 H23 O7, tgt=56.87, overall=56.87 ]	(359.1527, 98.04)(394.43265, 76637.195)(395.18228, 11776.999)(375.1738, 9531.88)	4.336
gibberellin Asub5/sub	1561248	1	1	1	1	1	1	1	1	1	1	1	1	1	1	gibberellin Asub5/sub	gibberellin Asub5/sub [ C19H21O5, tgt= ]	(311.1272, 42645.95)(312.13, 2979.33)	3.0236
gibberellin Asub51/sub	1121243	1205133	1137819	3738038	3730627	3718065	6099014	6135181	5996166	2659010	2761748	2737157	3554838	3608398	3515516	gibberellin Asub51/sub	gibberellin Asub51/sub [ C19 H23 O5, tgt=55.03, overall=55.03 ]	(335.3378, 13285.5205)(313.1412, 78528.48)(314.1455, 8134.8564)(336.17722, 75955.016)(337.1791, 11992.433)(350.19147, 28280.334)(351.19388, 5890.6616)(359.1527, 126.74)	5.0464
gibberellin Asub51/sub-catabolite	1362093	1431368	1348357	2056772	2078488	2150753	1	1	1	1	1	1	1	1	1	gibberellin Asub51/sub-catabolite	gibberellin Asub51/sub-catabolite [ C19 H20 O5, tgt=63.72, overall=63.72 ]	(329.13507, 33785.406)(330.13843, 2359.5583)(331.14502, 7447.19)	3.6615
gibberellin Asub53/sub	1059736	1122755	1048568	2191343	2085539	2174797	1000407	544057	788004	89522	4895232	4053483	505596	486380	414245	gibberellin Asub53/sub	gibberellin Asub53/sub [ C20 H26 O5, tgt=47.55, overall=47.55 ]	(350.19095, 4065.7556)(350.19217, 32968.375)(351.1964, 7522.4897)(364.20645, 25037.764)(365.2112, 4743.956)(348.71317, 27215.502)(348.2049, 402.84)(372.17325, 3572.7766)	4.8584
gibberellin Asub7/sub	1561248	1499267	1398321	2652581	1146993	1136058	370339	371891	336274	264679	276374	283958	169632	168676	173885	gibberellin Asub7/sub	gibberellin Asub7/sub [ C19 H21 O5, tgt=39.63, overall=39.63 ]	(331.14532, 16712.584)(330.1391, 1528.7667)(331.15524, 130.025)(311.12515, 17087.844)(312.1278, 2423.9768)(331.1446, 5303.0)(334.1596, 58809.95)(335.1619, 5061.44)(313.1406, 11814.476)(314.14288, 515.07666)(350.18768, 24112.443)(351.18723, 1240.7799)	5.16587
gibberellin Asub8/sub-catabolite	786725	834521	796577	1	1	1	1	1	1	1	1	1	1	1	1	gibberellin Asub8/sub-catabolite	gibberellin Asub8/sub-catabolite [ C19 H20 O7, tgt= ]	(365.09195, 38056.75)(366.09497, 1313.71)	2.18325
gibberellin Asub9/sub	1	1	1	869832	815653	662077	1	1	1	1	1	1	2588994	2565691	2609165	gibberellin Asub9/sub	gibberellin Asub9/sub [ C19 H23 O4, tgt=9.88, overall=9.88 ]	(316.17126, 12173.081)(317.16833, 4335.217)(318.18762, 6563.7134)(320.4818, 32275.252)(321.14978, 4085.4702)	2.83525
gibberellin Asub97/sub	1063817	1098835	1059108	770356	758621	754029	10308988	10267963	5207113	1	1	1	616301	627605	623086	gibberellin Asub97/sub	gibberellin Asub97/sub [ C20 H26 O6, tgt=42.30, overall=42.30 ]	(366.18716, 25142.625)(367.18692, 8305.687)(350.1907, 21486.523)(380.20114, 40074.43)(381.2041, 7286.8325)(363.0315, 9324.538)(363.19327, 1814.3866)(386.155, 108.49)	5.1988
gibberellin Asub98/sub	260326	290227	264160	584646	574503	588873	1636610	1683852	1602691	393060	199575	1	1	1	1	gibberellin Asub98/sub	gibberellin Asub98/sub [ C20 H27 O6, tgt=47.57, overall=47.57 ]	(350.18924, 4248.846)(350.19034, 25205.207)(351.19174, 2223.59)(384.2189, 2571.21)(366.18634, 16065.092)(371.1724, 9166.37)(364.0221, 27162.85)(365.21103, 4653.464)	4.8874
gibberellinsub44/sub (open lactone form)	1063817	1098835	1059108	770356	758621	754029	10308988	10267963	5207113	1	1	1	616301	627605	623086	gibberellinsub44/sub (open lactone form)	gibberellinsub44/sub (open lactone form) [ C20 H26 O6, tgt=42.30, overall=42.30 ]	(366.18716, 25142.625)(367.18692, 8305.687)(350.1907, 21486.523)(380.20114, 40074.43)(381.2041, 7286.8325)(363.0315, 9324.538)(363.19327, 1814.3866)(386.155, 108.49)	5.1988
ginsenoside Rg1	1	1	1	647962	574606	521183	1	1	1	1	1	1	1	1	1	ginsenoside Rg1	ginsenoside Rg1 [ C42 H72 O14, tgt=15.18, overall=15.18 ]	(801.50934, 13212.097)(802.5122, 3244.6667)	20.2665
glucodigifucoside	1	1	1	2659819	2629878	2612962	22178156	22686244	22069040	545793	612887	591400	9883190	9986669	9825764	glucodigifucoside	glucodigifucoside [ C35 H54 O13, tgt=41.30, overall=41.30 ]	(683.3741, 27673.803)(684.36456, 8731.717)(666.36066, 10328.124)(667.3613, 1309.9701)(700.3864, 1223.2667)(682.3822, 114247.03)(683.3845, 32531.299)(684.38306, 8251.639)(711.3686, 1778.2001)	5.1134
glucosyl-limonin	5451307	5600370	5388196	1	1	1	1	1	1	1	135176	134190	1	1	1	glucosyl-limonin	glucosyl-limonin [ C32 H41 O14, tgt= ]	(633.2504, 786.905)(667.26715, 110161.43)(668.2696, 26496.291)(669.2715, 1954.4501)(649.2905, 5853.75)	4.34136
glucosyl-oleandomycin	1	1	1	7087883	7048971	7034060	1	1	1	1	1	1	1	1	1	glucosyl-oleandomycin	glucosyl-oleandomycin [ C41 H72 N O17, tgt=45.83, overall=45.83 ]	(850.4543, 55055.68)(851.4571, 19997.19)(852.4693, 214089.88)(853.4725, 90659.25)(854.4744, 16661.453)(855.4765, 566.00665)	9.0874
glutaconate	13368353	14011639	8821788	13950722	13754451	13766840	14500312	14907253	15176394	13340369	13527496	13263799	12968991	13144306	13169548	glutaconate	glutaconate [ C5 H4 O4, tgt=58.66, overall=58.66 ]	(128.74884, 48875.54)(129.72716, 12102.336)(130.01068, 9853.033)(111.00481, 62298.312)(112.0012, 59641.28)(111.00583, 59833.1)(112.001945, 56804.17)(154.00682, 3226.5205)(155.0055, 287.26)(133.99506, 1536.8275)	2.0122
glutaryl-CoA	130044	1	1	532639	507710	1	123621	574064	148366	138475	138374	142410	161058	172202	164757	glutaryl-CoA	glutaryl-CoA [ C26 H37 N7 O19 P3 S, tgt=11.79, overall=11.79 ]	(881.1453, 887.19403)(894.166, 8056.009)(895.1627, 333.815)(880.7832, 1510.7544)(880.15985, 532.71)	22.9048
glutathione disulfide	1	1	1	255937	1	1	1	1	1	1	1	1	1	1	1	glutathione disulfide	glutathione disulfide [ C20 H30 N6 O12 S2, tgt=3.07, overall=3.07 ]	(611.1288, 6869.98)(592.1164, 281.45)	23.23
glyceryl 1-monostearate	2124039	2058271	2010129	1	1	1	1	1	1	1	863446	900250	649178	638146	688392	glyceryl 1-monostearate	glyceryl 1-monostearate [ C21 H42 O4, tgt= ]	(359.30142, 21750.158)(360.30438, 2081.702)(341.2916, 28750.672)(342.29462, 2821.612)	17.569
glycine betaine	1	1	1	1	1	1	27812862	28524112	28479840	1	1	1	1	1	1	glycine betaine	glycine betaine [ C5 H11 N O2, tgt= ]	(118.08096, 360782.84)(119.08407, 9395.76)	2.613
glycyrrhetaldehyde	1	1	1	1	1	1	1	1	1	1	1	1919229	339027	316584	132398	glycyrrhetaldehyde	glycyrrhetaldehyde [ C30 H46 O3, tgt= ]	(482.3494, 12761.18)(483.35165, 971.07)(463.3229, 398.59)	14.4239
gossypetin 3',8-dimethyl ether	124308	119333	127248	1	1	1	1	1	1	1	1	1	1	1	1	gossypetin 3',8-dimethyl ether	gossypetin 3',8-dimethyl ether [ C17 H13 O8, tgt=14.05, overall=14.05 ]	(365.09207, 17401.56)(366.09506, 801.2134)(345.0903, 8127.6304)	2.05
gossypol	885412	950456	859238	1	1	1	230132	238539	228411	2088525	2014587	2048030	155023	150889	156104	gossypol	gossypol [ C30H30O8, tgt= ]	(522.7154, 47434.492)(524.218, 9954.194)(537.2332, 36481.637)(537.238, 6145.19)(521.22833, 19187.756)(522.2199, 6757.777)(529.19806, 28241.396)	8.46723
gossypol-6,6'-dimethyl ether	1	1	1	1	1	1	699082	708705	669324	474656	455838	463601	2589571	2618562	2625588	gossypol-6,6'-dimethyl ether	gossypol-6,6'-dimethyl ether [ C32 H34 O8, tgt= ]	(548.23926, 13693.536)(549.24164, 1939.7867)(535.23315, 232378.11)(569.21405, 21560.584)(570.21674, 3748.0166)(557.2128, 8278.597)	9.90713
grasshopper ketone	1	1	1	654534	616574	600110	1	1	1	903046	995903	1012219	309583	314953	379556	grasshopper ketone	grasshopper ketone [ C13 H20 O3, tgt=46.66, overall=46.66 ]	(226.14552, 2016.1967)(242.17606, 8100.2656)(248.47, 7898.268)(234.1408, 4656.26)	3.2162
guaiacylglycerol-&beta;-guaiacyl ether	974103	1005399	965363	1030920	991746	973255	243736	237416	228062	1	1	1	2507493	2472945	2468533	guaiacylglycerol-&beta;-guaiacyl ether	guaiacylglycerol-&beta;-guaiacyl ether [ C17 H20 O6, tgt=31.84, overall=31.84 ]	(306.13232, 4678.733)(303.13113, 13215.208)(304.13272, 2806.2634)(338.16602, 4214.0366)(320.14804, 39053.254)(321.15103, 3067.0715)	3.0494
guanidinoacetate	1	1	1	641574	430045	464411	1	1	1	1	1	1	350442	355208	347819	guanidinoacetate	guanidinoacetate [ C3 H7 N3 O2, tgt=34.34, overall=34.34 ]	(117.0514, 921.33)(103.049194, 4968.5137)(118.05961, 7526.074)	4.163
guattegaumerine	188498	198442	179471	1679442	1786137	2066943	2205650	2238306	2124654	679438	708954	693512	1	1	1	guattegaumerine	guattegaumerine [ C36 H42 N2 O6, tgt=58.20, overall=58.20 ]	(602.18744, 10452.099)(602.30786, 1709.5024)(581.8978, 3508.6855)(585.3168, 1689.64)(584.3111, 6349.77)(585.3181, 1506.21)(598.9092, 12998.72)(600.32776, 3982.195)(621.53467, 13027.74)(622.28644, 3041.7666)(609.30884, 3941.9333)	6.1008
gypsogenate	642838	624406	602869	16187892	16293629	16544007	470182	467677	446522	594447	649253	638903	1772074	1728388	1795871	gypsogenate	gypsogenate [ C30 H44 O5, tgt=44.29, overall=44.29 ]	(471.33365, 1652.3734)(472.32755, 1608.5533)(472.32724, 16399.416)(473.32983, 1667.145)(502.33823, 5005.17)(512.32153, 13262.059)(513.32587, 5846.947)(489.28506, 107454.61)(490.2883, 32702.525)(491.2876, 10678.487)	7.5186
gypsogenate-28-beta-D-glucoside	1	1	1	1	1	1	1	1	1	359041	378860	471021	125170	132065	1	gypsogenate-28-beta-D-glucoside	gypsogenate-28-beta-D-glucoside [ C36 H55 O10, tgt=39.65, overall=39.65 ]	(665.7624, 4113.7603)(667.4279, 1253.55)(649.42206, 14056.047)(670.3727, 17823.879)(671.37164, 2388.6748)(652.3421, 12146.77)	10.8255
gypsogenin	1	1	1	908839	891739	893699	239659	238189	225314	111664	108319	108961	474129	455681	463234	gypsogenin	gypsogenin [ C30 H45 O4, tgt=14.80, overall=14.80 ]	(497.3503, 2636.2766)(453.328, 13806.454)(474.00308, 16302.353)(472.33286, 5052.81)(475.34094, 7309.897)	13.1913
gypsogenin-28-beta-D-glucoside	261184	258800	255350	1	1	1	723235	717053	710541	760182	781170	794084	557816	556474	565384	gypsogenin-28-beta-D-glucoside	gypsogenin-28-beta-D-glucoside [ C36 H56 O9, tgt= ]	(651.4152, 41084.996)(652.41754, 10106.474)(632.4312, 24718.32)(633.4341, 3929.3342)	9.40954
haematoporphyrin IX	3217528	3341787	3196377	390825	359291	2254169	246477	257387	238435	2197673	2213527	2209689	1177103	1188742	1157813	haematoporphyrin IX	haematoporphyrin IX [ C34 H36 N4 O6, tgt=47.56, overall=47.56 ]	(597.8554, 9712.128)(579.2476, 42352.492)(579.25073, 12870.285)(598.2586, 10455.304)(585.28864, 2134.4968)(615.306, 50073.66)(616.3079, 9511.22)(617.2878, 9803.13)(599.3085, 14810.63)(600.3104, 2324.17)(620.7483, 2104.7573)(606.2565, 4351.92)	8.19687
harmaline	1	1	1	1174973	410158	1173897	1	1	1	1	1	1	1	1	1	harmaline	harmaline [ C13 H14 N2 O, tgt=60.36, overall=60.36 ]	(201.1132, 101.74)(219.1233, 28963.078)(220.1262, 1536.79)(223.09673, 3377.46)(217.14386, 8273.043)(218.1415, 1599.31)	2.8668
hederagenin	127406	148235	142946	1	1	1	226280	141319	186160	1	108319	108961	325220	314348	300538	hederagenin	hederagenin [ C30 H47 O4, tgt= ]	(453.3276, 8115.947)(498.80548, 4176.669)(477.33844, 6698.3623)	14.0757
heliannuol C	8392858	8647739	8580862	1	1	206850	1551536	1602239	1601136	1583305	1568532	1541330	750647	750873	713470	heliannuol C	heliannuol C [ C15 H20 O3, tgt= ]	(233.13684, 46982.79)(249.14986, 469.16)(233.64392, 36444.26)(234.14305, 2052.555)(270.1809, 20089.158)(271.18298, 642.91003)(251.16594, 2546.72)(255.87775, 7583.873)(258.13388, 1273.6832)	2.7252
heliespirone B	120047	127264	129658	1	1	1	1	1	1	1	1	1	1	1	1	heliespirone B	heliespirone B [ C15 H24 O4, tgt=23.16, overall=23.16 ]	(251.16594, 6883.42)(270.1813, 10357.054)	3.662
heliespirone C	2008944	145269	2007061	14839510	14524781	14278668	12766376	13144110	13346178	9069664	9248635	9109613	11016858	11192076	11398338	heliespirone C	heliespirone C [ C15 H20 O4, tgt=61.62, overall=61.62 ]	(265.1361, 4105.3584)(251.139, 2345.7236)(265.4514, 153820.55)(266.14587, 14790.005)(247.13635, 3501.885)	3.131
heliocide B1	1	1	1	1	1	1	1592671	1674696	1577426	1	1	1	1	1	1	heliocide B1	heliocide B1 [ C26H31O5, tgt= ]	(428.22977, 3492.1965)(429.24893, 26301.094)(430.25003, 3741.2332)(407.21875, 20572.08)(408.2205, 354.69666)(444.2701, 2434.9766)(433.19885, 43552.746)(434.20108, 5228.89)	3.68
heliocide B2	1	1	1	1	1	1	1592671	1674696	1577426	1	1	1	1	1	1	heliocide B2	heliocide B2 [ C26H31O5, tgt= ]	(428.22977, 3492.1965)(429.24893, 26301.094)(430.25003, 3741.2332)(407.21875, 20572.08)(408.2205, 354.69666)(444.2701, 2434.9766)(433.19885, 43552.746)(434.20108, 5228.89)	3.68
heliocide B3	1	1	1	1	1	1	1592671	1674696	1577426	1	1	1	1	1	1	heliocide B3	heliocide B3 [ C26H31O5, tgt= ]	(428.22977, 3492.1965)(429.24893, 26301.094)(430.25003, 3741.2332)(407.21875, 20572.08)(408.2205, 354.69666)(444.2701, 2434.9766)(433.19885, 43552.746)(434.20108, 5228.89)	3.68
heliocide B4	8176177	8074228	8337233	1594250	524651	535856	1592671	1674696	1577426	1985186	252665	2052754	206888	211377	220927	heliocide B4	heliocide B4 [ C26 H31 O5, tgt=53.14, overall=53.14 ]	(427.4782, 2992.9724)(405.19534, 7143.91)(427.66006, 21639.514)(428.66998, 13037.876)(430.25003, 3741.2332)(407.6225, 29021.596)(408.32428, 7262.8076)(410.2224, 82640.84)(411.2233, 1113.04)(443.261, 2989.2268)(447.2594, 7376.35)(428.65265, 1657.6559)(429.2473, 838.33)(447.78476, 8326.997)(448.72098, 13422.164)(450.2178, 8409.054)(432.50284, 15365.932)(434.20108, 5228.89)	4.3432
heliocide H1	1	1	1	1	1031046	1	844010	1	859039	3649521	3645402	4375839	1	1	608410	heliocide H1	heliocide H1 [ C25H29O5, tgt= ]	(409.1968, 1367.09)(391.1802, 8204.925)(392.194, 1181.84)(415.48016, 10107.702)(392.5348, 26180.766)(393.60742, 5743.398)(428.90918, 7119.095)(429.5809, 17028.594)(430.25, 3186.075)(410.43344, 2031.7839)(433.60175, 6056.7363)(434.86963, 2685.0266)	3.7876
heliocide H2	1	1	1	1	1031046	1	844010	1	859039	3649521	3645402	4375839	1	1	608410	heliocide H2	heliocide H2 [ C25H29O5, tgt= ]	(409.1968, 1367.09)(391.1802, 8204.925)(392.194, 1181.84)(415.48016, 10107.702)(392.5348, 26180.766)(393.60742, 5743.398)(428.90918, 7119.095)(429.5809, 17028.594)(430.25, 3186.075)(410.43344, 2031.7839)(433.60175, 6056.7363)(434.86963, 2685.0266)	3.7876
heliocide H3	1	1	1	1	1031046	1	844010	1	859039	3649521	3645402	4375839	1	1	608410	heliocide H3	heliocide H3 [ C25H29O5, tgt= ]	(409.1968, 1367.09)(391.1802, 8204.925)(392.194, 1181.84)(415.48016, 10107.702)(392.5348, 26180.766)(393.60742, 5743.398)(428.90918, 7119.095)(429.5809, 17028.594)(430.25, 3186.075)(410.43344, 2031.7839)(433.60175, 6056.7363)(434.86963, 2685.0266)	3.7876
heliocide H4	192244	197892	1	558831	1031046	551119	844010	1	859039	3649521	3645402	4375839	1	1	608410	heliocide H4	heliocide H4 [ C25 H29 O5, tgt=42.84, overall=42.84 ]	(409.1968, 1367.09)(391.5173, 12766.801)(392.86087, 759.27)(415.06018, 9228.493)(392.5348, 26180.766)(393.60742, 5743.398)(428.4881, 7188.9404)(429.5809, 17028.594)(430.25, 3186.075)(410.43344, 2031.7839)(433.60175, 6056.7363)(434.86963, 2685.0266)(415.1811, 4734.495)	5.75462
heme id/i	331113	363833	365386	383093	338991	338632	464542	465064	459998	372902	374725	372575	457202	432188	428558	heme id/i	heme id/i [ C34 H32 Fe N4 O6, tgt=22.64, overall=22.64 ]	(650.15674, 10958.6455)(631.14734, 4769.203)(650.1608, 12340.711)(669.1718, 8268.487)(670.17413, 1297.8134)	23.3804
hemigossypol-6-methyl ether	1	1	1	1314699	1295182	1305496	1474606	1557116	1523517	243396	236832	241689	696101	713403	724215	hemigossypol-6-methyl ether	hemigossypol-6-methyl ether [ C16 H18 O4, tgt=47.09, overall=47.09 ]	(276.12192, 5631.29)(277.13882, 535.2833)(261.13226, 253.21333)(278.6558, 172086.61)(279.15872, 188134.73)(297.11325, 20258.76)(298.1154, 722.328)	3.751
hemigossypolone	937248	997462	970253	1918149	1927880	1898230	796935	801543	781614	1	1	1	2065723	2046843	2027075	hemigossypolone	hemigossypolone [ C15 H15 O5, tgt=41.94, overall=41.94 ]	(278.6106, 4686.3384)(294.1331, 4285.7363)(278.62445, 6672.722)(279.12463, 7062.245)	2.6265
hesperidin	1	1	1	1	1	1	1	1	1	174035	173632	173843	1	1	1	hesperidin	hesperidin [ C28 H34 O15, tgt= ]	(634.1976, 8871.747)(635.1902, 4045.9866)	9.238
hexadecanedioate	8589118	8826974	8830490	1	1	1	1	1	1	1	1	1	1	1	1	hexadecanedioate	hexadecanedioate [ C16 H28 O4, tgt=44.62, overall=44.62 ]	(266.18457, 161171.36)(267.19244, 17821.268)	3.326
hexahomomethionine	8887667	9395970	9453259	4939619	4877024	4940224	4613918	4336938	4321499	5587467	5643269	1	5126079	5113581	5103520	hexahomomethionine	hexahomomethionine [ C11 H23 N O2 S, tgt=68.90, overall=68.90 ]	(233.14008, 83406.34)(234.14272, 3703.3584)(215.12944, 5853.096)(235.15387, 541.8667)(217.14539, 27220.447)(218.14326, 1382.521)(236.1627, 4045.9531)(259.91995, 7810.868)(259.93463, 5883.3955)(261.1351, 5456.725)(241.90923, 9807.205)(243.12474, 22719.451)	2.5814
hexaketide pyrone	1	1	1	1	1	1	1	1	1	1	1	1	12696404	12721595	12833544	hexaketide pyrone	hexaketide pyrone [ C12 H9 O5, tgt= ]	(251.08203, 354110.47)(252.08484, 34928.754)(253.08636, 799.1167)	6.314
hexanoyl-CoA	1776390	1880154	1902508	1945399	1850153	1850716	2279590	2250841	2203300	2025712	2043981	2013824	2493784	2550497	2496315	hexanoyl-CoA	hexanoyl-CoA [ C27 H42 N7 O17 P3 S, tgt=24.14, overall=24.14 ]	(865.14923, 4723.9263)(843.13727, 8411.835)(850.14606, 56596.32)(879.16785, 45446.89)(880.1692, 5847.6465)(887.1606, 1548.1986)(871.35364, 4366.3984)(872.16016, 7253.435)	23.1464
hispidol	1	1	1	1	1	1494283	1	1	1	16047517	16141532	15942973	1	1	1	hispidol	hispidol [ C15 H10 O4, tgt= ]	(255.0547, 330717.3)(256.05756, 37128.504)(257.0599, 1386.2201)	7.89243
homocarnosine	4800171	5080107	5132739	423677	427772	471148	1	1	1	2582280	2547845	2479256	1	1	1	homocarnosine	homocarnosine [ C10 H16 N4 O3, tgt=68.38, overall=68.38 ]	(243.12354, 25745.398)(244.12569, 3281.24)(246.13524, 8391.804)(263.16556, 55426.105)(240.14192, 38235.883)(241.14568, 970.13995)(267.1225, 26513.781)(268.12384, 1763.6823)(245.10262, 3697.515)	3.031
homogentisate	355957	377436	352721	504116	477929	489794	504513	518310	524257	432036	432244	407891	403190	415685	395140	homogentisate	homogentisate [ C8 H7 O4, tgt=88.85, overall=88.85 ]	(151.02907, 146297.6)(152.0303, 16936.002)(168.04353, 24971.963)(169.04465, 1698.5535)(170.04137, 610.2955)(151.03026, 152568.56)	2.0036
hordatine A	272588	269952	262133	182689	191470	188542	22410552	22408198	22513988	16758105	16794900	16643157	492917	480505	491593	hordatine A	hordatine A [ C28 H40 N8 O4, tgt=47.17, overall=47.17 ]	(553.32056, 7377.131)(556.3277, 1874.9166)(553.30975, 79793.51)(554.31104, 16374.079)(570.342, 540683.06)(571.34344, 93445.25)(572.34375, 7030.33)(555.3454, 146184.02)(557.34973, 54245.97)(558.3516, 4946.9385)(576.56354, 7268.4707)(576.81067, 1879.2626)(557.3096, 706.92334)	6.4948
humulone	597862	1458584	1732487	1704725	3477405	3560451	3017888	5994771	4034622	358861	1307386	646220	693517	699560	1393645	humulone	humulone [ C21 H29 O5, tgt=36.96, overall=36.96 ]	(363.10333, 13031.371)(364.60822, 5923.678)(343.18356, 3450.827)(344.1844, 217.49)(364.20605, 8589.172)(365.2124, 501.13)(345.53308, 14207.516)(347.95575, 1307.19)(349.2167, 6864.535)(379.22586, 11262.923)(387.8678, 6666.467)(386.2002, 1722.31)(366.64252, 27194.393)(367.1869, 5323.8525)	4.79653
hydrogenobyrinate ia,c/i-diamide	1	1	1	1	1	1	1	1	1	1	1	1	135599	131680	129255	hydrogenobyrinate ia,c/i-diamide	hydrogenobyrinate ia,c/i-diamide [ C45H58N6O12, tgt= ]	(892.4664, 7648.1636)(893.46893, 1449.7633)	9.3152
hydroxy-&beta;-zeacarotene	530170	571888	562827	464902	439728	423420	633835	633362	625357	467098	443919	438002	310030	276085	279480	hydroxy-&beta;-zeacarotene	hydroxy-&beta;-zeacarotene [ C40 H58 O, tgt=32.68, overall=32.68 ]	(559.45056, 22733.916)(560.45337, 2908.24)(575.47766, 10473.017)(576.4805, 2087.7932)(579.8508, 2133.4585)(581.4593, 6076.139)(560.442, 2554.44)	21.8834
hydroxyspirilloxanthin	372874	1	373856	1	1	1	78180	78010	90133	1	1	1	204858	197264	194991	hydroxyspirilloxanthin	hydroxyspirilloxanthin [ C41 H58 O2, tgt= ]	(582.44794, 3032.7334)(589.4567, 1490.0967)(566.4424, 4950.14)(567.446, 5106.7637)(603.4744, 78107.83)(604.47626, 16664.463)(608.9598, 1940.1866)(611.47, 555.04504)(588.4092, 21657.844)(589.412, 2751.0151)	19.5206
hydroxyversicolorone	1	1	1	1	1	1	1	1	1	1	1	1	554297	544875	547831	hydroxyversicolorone	hydroxyversicolorone [ C20 H15 O8, tgt= ]	(401.10684, 29706.1)(402.1096, 2262.1667)	7.9216
hygromycin-B	1	1	1	4104104	4067430	4036815	461789	482256	1	7820398	7673199	7815867	1	1	1	hygromycin-B	hygromycin-B [ C20 H40 N3 O13, tgt=59.18, overall=59.18 ]	(518.2801, 780.93)(530.2819, 49485.758)(531.2837, 7778.5015)(532.2754, 1891.6866)(536.2331, 109338.14)(537.23334, 31683.084)(537.238, 5509.48)	7.888
hyodeoxycholate	842806	1166175	1	1	1	1	1	272227	1	1	1	249378	1	1	1	hyodeoxycholate	hyodeoxycholate [ C24 H39 O4, tgt=3.58, overall=3.58 ]	(373.264, 7232.8)(414.27002, 19083.373)(415.266, 253.2)(399.2649, 34737.164)	4.222
hyperforin	1	1	1	1405650	1398201	1378296	6362824	2554316	2228726	160463	161290	164171	1	1	1	hyperforin	hyperforin [ C35 H51 O4, tgt=16.23, overall=16.23 ]	(536.36615, 4203.3335)(540.38715, 2682.27)(560.3674, 7868.9805)(561.36957, 1246.4532)(541.36914, 10631.647)(542.36743, 4577.8335)	11.948
hypoglycin B	134407	176700	1	1712641	1631668	1658098	724876	778733	720567	639586	246512	262122	883761	1743640	1772495	hypoglycin B	hypoglycin B [ C12 H17 N2 O5, tgt=39.47, overall=39.47 ]	(297.11362, 22017.332)(253.10925, 9533.1)(290.15695, 8377.96)(277.1062, 14666.172)(272.14926, 3312.62)	3.045
hypoxanthine	545383	568076	578456	1	1	1	1	1	1	1	1	1	1	1	1	hypoxanthine	hypoxanthine [ C5 H4 N4 O, tgt= ]	(137.0403, 4363.203)(138.04926, 4604.2437)	2.5738
hypusine	787461	850822	828176	1	1	1	1	1	1	1	1	1	1	1	1	hypusine	hypusine [ C10 H25 N3 O3, tgt=31.71, overall=31.71 ]	(235.20752, 17546.893)(260.18613, 427.41333)(245.1773, 857845.2)	3.129
iall-trans/i-&zeta;-carotene	396960	427008	421958	1	1	1	1	1	1	1	1	1	1	1	1	iall-trans/i-&zeta;-carotene	iall-trans/i-&zeta;-carotene [ C40 H60, tgt= ]	(547.49835, 7346.6235)(559.4981, 15961.6455)(560.501, 2705.2832)	15.8428
iall-trans/i-10'-apo-&beta;-carotenal	2456444	2355124	2335777	1	1	1	1	1	1	494618	502339	2398740	1	1	1	iall-trans/i-10'-apo-&beta;-carotenal	iall-trans/i-10'-apo-&beta;-carotenal [ C27 H36 O, tgt= ]	(358.25598, 90183.77)(359.25833, 9730.252)(377.31, 14044.505)(380.3202, 558.76)(401.26172, 206.97)(383.26138, 34753.992)(384.26248, 2650.9434)	7.76
iall-trans/i-3,4-didehydrolycopene	3096580	3194003	3122895	1	1	1	1	1	1	1	1	1	1	1	5018223	iall-trans/i-3,4-didehydrolycopene	iall-trans/i-3,4-didehydrolycopene [ C40 H54, tgt= ]	(558.4003, 157162.53)(559.40295, 32305.043)(560.4054, 1582.43)	10.0372
iall-trans/i-4,4'-diapolycopene	1151106	1185818	1178479	1	1	1	2275857	2243830	2240454	659363	673452	668796	2331483	2339774	2325614	iall-trans/i-4,4'-diapolycopene	iall-trans/i-4,4'-diapolycopene [ C30 H40, tgt=53.54, overall=53.54 ]	(424.30942, 74349.57)(425.31213, 9212.781)	9.98125
iall-trans/i-retinol	1	1	1	143126	1	1	1	1	1	1	1	1	1	1	1	iall-trans/i-retinol	iall-trans/i-retinol [ C20 H30 O, tgt=45.81, overall=45.81 ]	(309.2098, 8821.06)(292.2124, 319.25)	9.12
icis/i-1,2-dihydrobenzene-1,2-diol	662556	715667	839496	1	1	1	1	1	1	1	1	1	1	1	1	icis/i-1,2-dihydrobenzene-1,2-diol	icis/i-1,2-dihydrobenzene-1,2-diol [ C6 H8 O2, tgt=46.72, overall=46.72 ]	(116.0662, 1404.6635)(138.04926, 2876.0867)	2.297
icis/i-abscisic alcohol	1	1	1	265451	249109	243583	1	1	1	1	1	1	1	1	1	icis/i-abscisic alcohol	icis/i-abscisic alcohol [ C15 H22 O3, tgt=18.93, overall=18.93 ]	(276.14688, 4885.1567)(255.13257, 10689.946)	2.3042
icis/i-caffeate	1098067	1185853	1197950	1	1	1	1045405	1087842	1078573	1	1	1	462505	473007	447480	icis/i-caffeate	icis/i-caffeate [ C9 H7 O4, tgt=73.41, overall=73.41 ]	(183.04347, 2190.0984)(161.02287, 26742.764)(162.02422, 1221.4618)(163.02037, 771.74506)(165.043, 337.85)	2.223
icis/i-vaccenate	215010224	255907440	1	120543232	120944848	120876248	166628576	167584464	165638384	59428980	57757856	57973104	184009824	183608944	188123344	icis/i-vaccenate	icis/i-vaccenate [ C18 H33 O2, tgt=38.66, overall=38.66 ]	(281.25458, 436.43503)(265.24155, 61293.82)(266.24435, 7195.0625)(268.25186, 1658.2899)(282.26785, 2494932.0)(283.27115, 472294.84)(284.2747, 36927.24)(285.28674, 1772.51)(286.2897, 93.27)	16.6468
icis/i-zeatin	1300222	1425285	1390608	1	1	1	1	1	1	2509472	2602995	2756395	1804009	1865167	1826998	icis/i-zeatin	icis/i-zeatin [ C10 H13 N5 O, tgt= ]	(246.11143, 2739.67)(247.119, 9015.113)(205.1104, 1098.2234)	2.542
icis/i-zeatin riboside	1	1	1	3743938	3755498	3743998	1993301	2030303	2001748	1	1	1	1	1	1	icis/i-zeatin riboside	icis/i-zeatin riboside [ C15 H21 N5 O5, tgt=22.42, overall=22.42 ]	(338.15555, 2022.1266)(352.17014, 9183.378)(353.1735, 220.16333)(334.1602, 34326.8)(335.16232, 5733.9897)(374.21042, 17127.25)	3.70575
ient/i-7&alpha;-hydroxykaur-16-en-19-oate	125839	4587953	130800	1	1	1	1	1	1	1	1	1	1	1	881940	ient/i-7&alpha;-hydroxykaur-16-en-19-oate	ient/i-7&alpha;-hydroxykaur-16-en-19-oate [ C20H29O3, tgt= ]	(317.2163, 4459.23)(318.47882, 7236.462)(335.241, 679.38)(320.24435, 34844.85)(321.24765, 3595.0066)	13.8488
ient/i-cassa-12,15-diene	319766	360653	330787	1	1	1	1	1	1	1	1	1	1	1	1	ient/i-cassa-12,15-diene	ient/i-cassa-12,15-diene [ C20 H32, tgt= ]	(295.23553, 21282.799)(296.24646, 684.85333)	13.4055
ient/i-isokaurene	319766	360653	330787	1	1	1	1	1	1	1	1	1	1	1	1	ient/i-isokaurene	ient/i-isokaurene [ C20 H32, tgt= ]	(295.23553, 21282.799)(296.24646, 684.85333)	13.4055
ient/i-kaurenal	1	1	1	143126	1	1	1	1	1	1	1	1	1	1	1	ient/i-kaurenal	ient/i-kaurenal [ C20 H30 O, tgt=45.81, overall=45.81 ]	(309.2098, 8821.06)(292.2124, 319.25)	9.12
ient/i-kaurene	319766	360653	330787	1	1	1	1	1	1	1	1	1	1	1	1	ient/i-kaurene	ient/i-kaurene [ C20 H32, tgt= ]	(295.23553, 21282.799)(296.24646, 684.85333)	13.4055
ient/i-pimara-8(14),15-diene	319766	360653	330787	1	1	1	1	1	1	1	1	1	1	1	1	ient/i-pimara-8(14),15-diene	ient/i-pimara-8(14),15-diene [ C20 H32, tgt= ]	(295.23553, 21282.799)(296.24646, 684.85333)	13.4055
ient/i-sandaracopimaradiene	319766	360653	330787	1	1	1	1	1	1	1	1	1	1	1	1	ient/i-sandaracopimaradiene	ient/i-sandaracopimaradiene [ C20 H32, tgt= ]	(295.23553, 21282.799)(296.24646, 684.85333)	13.4055
ierythro/i-guaiacylglycerol-&beta;-guaiacyl ether	974103	1005399	965363	1030920	991746	973255	243736	237416	228062	1	1	1	1	1	1	ierythro/i-guaiacylglycerol-&beta;-guaiacyl ether	ierythro/i-guaiacylglycerol-&beta;-guaiacyl ether [ C17 H20 O6, tgt=31.84, overall=31.84 ]	(303.13113, 13215.208)(304.13272, 2806.2634)(338.16602, 4214.0366)(320.14832, 31787.502)(321.1522, 2046.1)	2.7742
im/i-topolin	1	1	1	6189064	6173871	6175621	1	1	1	8011026	8167883	8158383	1	1	1	im/i-topolin	im/i-topolin [ C12 H13 N5 O, tgt=69.45, overall=69.45 ]	(261.1483, 186587.39)(262.1509, 16989.158)	6.5698
imeso/i-diaminopimeloyl-alanine	5415090	5501053	3894561	942949	958036	968501	28412168	74429440	74446544	1175630	757966	1173009	33491996	33835192	33934640	imeso/i-diaminopimeloyl-alanine	imeso/i-diaminopimeloyl-alanine [ C10 H19 N3 O5, tgt=68.14, overall=68.14 ]	(262.279, 13376.698)(265.74515, 11344.246)(266.1463, 1318.715)(243.12343, 17934.443)(244.12338, 2222.3713)(265.1436, 36143.05)(266.14624, 2954.0742)(246.13506, 43739.37)(247.13487, 1541.9452)(279.15942, 354411.1)(280.16205, 46715.617)(281.16364, 2468.376)(261.82117, 26266.54)(264.16736, 6877.936)(285.1224, 22547.363)(286.12888, 2671.706)(267.37134, 18413.605)(268.12347, 903.9)	3.4258
imeso/i-tartrate	1	1	1	106072	102671	112097	94480	92142	94175	97020	87707	89654	1	1	1	imeso/i-tartrate	imeso/i-tartrate [ C4 H4 O6, tgt=51.83, overall=51.83 ]	(130.99191, 7257.534)(132.56352, 1157.4598)(133.99516, 2141.7134)(168.04309, 32738.352)(169.0441, 2460.7444)(170.04108, 857.52454)(151.02888, 181127.97)(152.0302, 21325.96)(157.99557, 3122.0652)	2.066
imidazole-pyruvate	202300	210364	217021	1	1	1	248314	237179	243653	1	1	195842	186933	184076	194665	imidazole-pyruvate	imidazole-pyruvate [ C6 H5 N2 O3, tgt=41.94, overall=41.94 ]	(153.0271, 12428.831)(138.02243, 9362.634)(163.02005, 450.788)	2.0151
iN,N/i-dihydroxy-L-tryptophan	1	1	1	1	1	1	1	1	1	1	1	1	750647	750873	713470	iN,N/i-dihydroxy-L-tryptophan	iN,N/i-dihydroxy-L-tryptophan [ C11 H11 N2 O4, tgt=29.62, overall=29.62 ]	(237.08073, 466.37)(253.10826, 13721.2705)	2.695
iN,N/i-dimethylaniline-iN/i-oxide	8691283	11775848	7515011	4264632	5317612	5442971	4448551	9612990	4487893	5061446	5025180	4893695	5197958	5093045	1799131	iN,N/i-dimethylaniline-iN/i-oxide	iN,N/i-dimethylaniline-iN/i-oxide [ C8 H11 N O, tgt=63.57, overall=63.57 ]	(120.07556, 93602.484)(121.078316, 2278.2585)(160.07231, 1736.5865)(144.0731, 3396.48)	3.363
iN/i, iN/i-dihydroxy-tetrahomomethionine	1	1	711740	1224598	1184405	1179708	6499588	6688214	6765499	2298967	2315130	2179474	1582935	1590788	1	iN/i, iN/i-dihydroxy-tetrahomomethionine	iN/i, iN/i-dihydroxy-tetrahomomethionine [ C9 H18 N O4 S, tgt=56.76, overall=56.76 ]	(223.09764, 8492.218)(256.6329, 1193.5988)(257.73257, 729.31604)(237.99078, 4278.6973)	2.80067
iN/i,iN'/i-diacetylchitobiose	725008	752066	710155	1	1	1	253284	257803	246379	1	1	1	1	1	1	iN/i,iN'/i-diacetylchitobiose	iN/i,iN'/i-diacetylchitobiose [ C16 H28 N2 O11, tgt=9.00, overall=9.00 ]	(407.17734, 29323.697)(408.1837, 2579.36)(442.20987, 5490.4165)(428.1973, 502.47998)	5.315
iN/i,iN/i-dihydroxyhexahomomethioniate	3851940	3914600	3902847	579316	571907	612494	320589	310855	310523	247325	301509	285218	10876186	10984530	11204567	iN/i,iN/i-dihydroxyhexahomomethioniate	iN/i,iN/i-dihydroxyhexahomomethioniate [ C11 H22 N O4 S, tgt=47.18, overall=47.18 ]	(266.32526, 19240.613)(268.12335, 4172.5737)(247.1192, 4344.303)(249.11569, 4099.318)(247.11784, 8883.194)(248.1132, 669.35004)(286.16354, 22103.75)(287.1637, 10337.135)(288.1645, 80.55)(267.74786, 40998.965)(267.6491, 8443.118)(292.11703, 1503.0734)(269.09998, 6720.4873)	2.799
iN/i,iN/i-dihydroxypentahomomethionine	1	1	1	1	1	1	1	1	1	1508643	1353993	1506409	1	1	1	iN/i,iN/i-dihydroxypentahomomethionine	iN/i,iN/i-dihydroxypentahomomethionine [ C10 H20 N O4 S, tgt= ]	(253.11162, 20796.164)(235.10817, 639.2033)(237.1132, 32748.854)(238.11629, 977.8133)(269.1491, 184.58667)(251.13887, 1804.9233)	2.876
iN/i-[(5iS/i)-5-amino-5-carboxypentanoyl]-L-cysteinyl-D-valine	1	1	1	1	1	1	1	1	1	1	1	1	2121590	2100293	2042788	iN/i-[(5iS/i)-5-amino-5-carboxypentanoyl]-L-cysteinyl-D-valine	iN/i-[(5iS/i)-5-amino-5-carboxypentanoyl]-L-cysteinyl-D-valine [ C14 H24 N3 O6 S, tgt= ]	(345.1301, 118.915)(380.1775, 23396.78)(381.17944, 999.9133)(364.17145, 1111.7849)	5.0265
iN/i6,iN/i6,iO/i-tridemethylpuromycin	1	1	1	1	1	1	1	1	1	1	1	1	599813	594868	626231	iN/i6,iN/i6,iO/i-tridemethylpuromycin	iN/i6,iN/i6,iO/i-tridemethylpuromycin [ C19 H24 N7 O5, tgt= ]	(414.18497, 1008.48)(431.21094, 31321.555)(432.21335, 3873.8132)	4.1005
iN/i-acetyl-&beta;-D-glucosaminyl-(1&rarr;4)-D-glucosamine	1	1	1	1	1	1	541402	562238	551816	1	1	1	1	1	1	iN/i-acetyl-&beta;-D-glucosaminyl-(1&rarr;4)-D-glucosamine	iN/i-acetyl-&beta;-D-glucosaminyl-(1&rarr;4)-D-glucosamine [ C14 H27 N2 O10, tgt= ]	(384.17368, 25655.836)(385.17648, 1830.2799)	5.7684
iN/i-acetyl-iN/i6,iN/i6,iO/i-tridemethylpuromycin	1	1	1	4494152	4286100	2945333	1	1	1	220725	214586	204567	10330913	10345947	10199893	iN/i-acetyl-iN/i6,iN/i6,iO/i-tridemethylpuromycin	iN/i-acetyl-iN/i6,iN/i6,iO/i-tridemethylpuromycin [ C21 H25 N7 O6, tgt=18.82, overall=18.82 ]	(494.18982, 10693.454)(489.23364, 190588.83)(490.23593, 21538.646)(491.23987, 336.93668)(476.1942, 588.47)(479.1716, 2157.5466)(473.46777, 37713.055)(474.46948, 5398.327)(476.22864, 747.5434)	7.50675
iN/i-acetyl-iO/i-demethylpuromycin	379823	373630	362538	1547317	1522511	1	642522	679898	592338	976486	960064	1003939	1110317	1092306	1095791	iN/i-acetyl-iO/i-demethylpuromycin	iN/i-acetyl-iO/i-demethylpuromycin [ C23 H29 N7 O6, tgt=47.58, overall=47.58 ]	(518.24646, 14863.805)(519.2428, 2073.9365)(500.61096, 10921.996)(500.24692, 3329.6262)(523.21606, 270.51)(505.19913, 51328.363)(506.20166, 8664.566)	5.6206
iN/i-acetyl-iS/i-geranylgeranyl-L-cysteine	1	1	1	2100395	2103451	2129217	1	1	1	115674	113663	115075	225984	211146	1	iN/i-acetyl-iS/i-geranylgeranyl-L-cysteine	iN/i-acetyl-iS/i-geranylgeranyl-L-cysteine [ C25 H40 N O3 S, tgt=53.49, overall=53.49 ]	(434.27075, 6952.953)(441.28345, 2026.7167)(457.3185, 72818.945)(458.3209, 10963.356)(459.51456, 18219.143)(458.26627, 3729.2869)(442.5859, 3780.7136)	5.50582
iN/i-acetylmuramate	1	1	1	1	1	1	1	1	1	246922	246512	262122	1	1	1	iN/i-acetylmuramate	iN/i-acetylmuramate [ C11 H18 N O8, tgt= ]	(297.11362, 4530.27)	3.562
iN/i-acetylpuromycin	242867	247710	229134	3433921	3540719	3587493	2408930	2459376	2408442	1059780	1054318	765830	10476311	10402787	10633070	iN/i-acetylpuromycin	iN/i-acetylpuromycin [ C24 H31 N7 O6, tgt=51.30, overall=51.30 ]	(516.2293, 4473.5117)(496.72, 128982.69)(497.7229, 28266.74)(498.73502, 4810.8564)(500.24637, 1043.7167)(501.49594, 7343.742)(500.248, 3559.13)(531.2768, 6821.767)(532.2754, 1072.9833)(515.10095, 5542.606)(516.26166, 11558.133)(517.2636, 1303.2433)(537.2286, 8541.047)(538.2308, 643.2533)(520.70654, 7890.518)(524.21814, 1976.4366)	4.91353
iN/i-acetyl-serotonin	1	1	1	3726449	3389604	1	698547	1	1	1	1	1	1	1	1	iN/i-acetyl-serotonin	iN/i-acetyl-serotonin [ C12 H14 N2 O2, tgt=47.45, overall=47.45 ]	(245.1021, 2007.5933)(205.1086, 1242.84)(218.1029, 319.69998)	2.39607
iN/i-benzoylanthranilate	1	1	1	242293	181455	1898230	796935	1	1	2701554	2700011	2704863	1	1	1	iN/i-benzoylanthranilate	iN/i-benzoylanthranilate [ C14 H10 N O3, tgt=44.71, overall=44.71 ]	(258.0983, 30571.059)(259.10217, 384.6067)(245.1027, 2594.8958)	2.644
iN/i-benzylformamide	1	1	1	1	1	1	217663	642299	445148	436459	426487	457033	666618	360258	355333	iN/i-benzylformamide	iN/i-benzylformamide [ C8 H9 N O, tgt= ]	(136.06934, 3352.2837)(118.059906, 3054.3223)(121.0779, 5081.59)	3.68536
iN/i-debenzoyl-(3'-iRS/i)-2'-deoxytaxol	1	1	1	747499	1	1	3189024	3240909	3108249	1	348845	331226	1	1	1	iN/i-debenzoyl-(3'-iRS/i)-2'-deoxytaxol	iN/i-debenzoyl-(3'-iRS/i)-2'-deoxytaxol [ C40 H48 N O12, tgt=6.33, overall=6.33 ]	(735.9275, 6217.958)(736.9303, 571.104)(720.3377, 379.00333)(721.3402, 213.69)(719.342, 18358.64)(720.34, 1363.02)(752.33563, 1438.2633)(739.295, 92001.23)(740.29767, 28707.014)(741.2998, 3025.6633)	7.48692
iN/i-debenzoyl-(3'-iRS/i)-taxol	1	1	1	501040	1	1	2071686	2143756	2018593	1	1	1	1	1	1	iN/i-debenzoyl-(3'-iRS/i)-taxol	iN/i-debenzoyl-(3'-iRS/i)-taxol [ C40 H48 N O13, tgt=11.90, overall=11.90 ]	(733.3162, 44392.95)(734.3184, 12895.641)(773.3224, 25430.89)(774.325, 291.57)	6.9496
iN/i-feruloyltyramine	1121243	1182138	1097841	3700347	3676468	3669021	6180838	6222966	6071290	2659010	2761748	2737157	3548608	3608398	3515516	iN/i-feruloyltyramine	iN/i-feruloyltyramine [ C18 H19 N O4, tgt=45.71, overall=45.71 ]	(313.6413, 49096.55)(314.14236, 8380.87)(314.1446, 7526.4517)(336.1769, 56082.273)(317.36426, 99706.875)(318.1689, 7901.197)(336.12192, 714.51337)	5.0528
iN/i-formimino-L-glutamate	1	1	1	1	1	1	1	1	1	1	1	1	160308	168537	166064	iN/i-formimino-L-glutamate	iN/i-formimino-L-glutamate [ C6 H9 N2 O4, tgt= ]	(191.09514, 8562.047)(183.04329, 2705.2002)	2.45225
iN/i-hydroxyhexahomomethioniate	767326	1	1	1050941	1006492	997431	1551536	1602239	1601136	1429189	1422142	1394840	750647	750873	713470	iN/i-hydroxyhexahomomethioniate	iN/i-hydroxyhexahomomethioniate [ C11 H22 N O3 S, tgt=46.71, overall=46.71 ]	(250.50522, 8910.565)(251.13875, 7366.55)(251.13979, 10347.572)(276.1211, 355.6)(253.109, 18179.012)	2.70023
iN/i-hydroxy-L-tryptophan	1	1	1	1224598	1184405	1179708	6499588	6688214	6765499	2298967	2315130	2185731	1582935	1590788	1	iN/i-hydroxy-L-tryptophan	iN/i-hydroxy-L-tryptophan [ C11 H11 N2 O3, tgt=44.44, overall=44.44 ]	(223.09747, 6986.128)(237.11278, 42294.355)(238.11594, 2287.9185)	2.796
iN/i-hydroxy-L-valine	1	1	1	376820	351219	339033	324253	1	1	336738	333749	1	1	1	1	iN/i-hydroxy-L-valine	iN/i-hydroxy-L-valine [ C5 H10 N O3, tgt=47.36, overall=47.36 ]	(120.07523, 88385.66)(138.0483, 7172.7266)	2.7262
iN/i-hydroxypentahomomethionine	385489	428243	418305	1	1	1	1	1	1	222380	232080	232807	1	1	1	iN/i-hydroxypentahomomethionine	iN/i-hydroxypentahomomethionine [ C10 H20 N O3 S, tgt= ]	(237.11397, 18204.572)(238.11635, 746.9267)(218.10431, 280.965)(239.12755, 995.675)(254.15038, 10751.37)(234.14326, 8952.7)(259.10217, 682.6867)	2.5644
iN/i-methylanthraniloyl-CoA	1511409	1595090	1603126	1666195	1576926	1582725	1966277	1948583	1903849	1737651	1765679	1734508	107361	2216534	103360	iN/i-methylanthraniloyl-CoA	iN/i-methylanthraniloyl-CoA [ C29 H39 N8 O17 P3 S, tgt=46.39, overall=46.39 ]	(898.1302, 6111.6504)(881.1455, 2494.9849)(900.4968, 6507.3735)(881.0677, 2287.6538)(881.1379, 1233.51)(916.17944, 451.295)(901.1789, 6731.8716)	22.4876
iN/i-methyl-L-glutamate	88085	92616	93788	1	1	1	1	1	1	1	1	1	1	1	1	iN/i-methyl-L-glutamate	iN/i-methyl-L-glutamate [ C6 H10 N O4, tgt=55.33, overall=55.33 ]	(168.04439, 23476.502)(169.0456, 1753.0801)	2.092
IN/I-methyl-L-tryptophan	1	1	1	3726449	3389604	1	698547	1	1	1	1	1	1	1	1	IN/I-methyl-L-tryptophan	IN/I-methyl-L-tryptophan [ C12 H14 N2 O2, tgt=47.45, overall=47.45 ]	(245.1021, 2007.5933)(205.1086, 1242.84)(218.1029, 319.69998)	2.39607
iN/i-nitro-L-arginine	1300222	1425285	1390608	3656841	3860059	3635404	961612	1010032	1016309	3018740	3030606	3002610	1871917	1879129	1833164	iN/i-nitro-L-arginine	iN/i-nitro-L-arginine [ C6 H13 N5 O4, tgt=42.58, overall=42.58 ]	(221.90166, 5908.3423)(223.09863, 7937.1797)(203.09435, 805.5617)(225.11267, 803.27)(239.80333, 9493.859)(240.1434, 41429.965)(241.14554, 821.96497)(219.12454, 29202.963)(220.12636, 1155.1866)	2.5148
iN/i-succinyl-L,L-2,6-diaminopimelate	1	1	1	160497	161964	158772	1	1	1	475413	468194	482957	238305	239248	252508	iN/i-succinyl-L,L-2,6-diaminopimelate	iN/i-succinyl-L,L-2,6-diaminopimelate [ C11 H16 N2 O7, tgt=47.11, overall=47.11 ]	(292.11584, 4453.9155)(306.131, 9217.547)	3.706
iN/isup&beta;/sup-acetylstreptothricin F	1030119	1050841	1036799	167573	177265	178134	4009571	4092560	3911375	348680	385345	1237886	1	1	1	iN/isup&beta;/sup-acetylstreptothricin F	iN/isup&beta;/sup-acetylstreptothricin F [ C21 H38 N8 O9, tgt=42.78, overall=42.78 ]	(546.27545, 49174.24)(547.27924, 20303.5)(548.28094, 937.01)(534.2694, 3472.4019)(531.95404, 21351.371)(533.12177, 6446.607)(533.289, 2022.53)(570.3211, 3791.39)(546.30426, 26546.268)(547.3075, 4996.578)(548.3264, 1005.87665)(573.2792, 177.57)	6.05713
iN/isup1/sup-(5-phospho-&beta;-D-ribosyl)glycinamide	1	1	1	1	1	1	1	1	1	3073707	3106154	3156533	1	1	1	iN/isup1/sup-(5-phospho-&beta;-D-ribosyl)glycinamide	iN/isup1/sup-(5-phospho-&beta;-D-ribosyl)glycinamide [ C7 H14 N2 O8 P, tgt= ]	(285.06412, 103150.06)(286.06693, 8319.394)	8.3818
iN/isup1/sup-acetylspermine	1	1	7182392	1	1	1	1	1	1	1	1	1	1	1	1	iN/isup1/sup-acetylspermine	iN/isup1/sup-acetylspermine [ C12 H31 N4 O, tgt= ]	(254.2394, 3794.06)(255.2421, 215.8)	12.086
iN/isup2/sup-formyl-iN/isup1/sup-(5-phospho-&beta;-D-ribosyl)glycinamide	102852	102157	109314	1	1	1	1	1	1	1	1	1	1	1	1	iN/isup2/sup-formyl-iN/isup1/sup-(5-phospho-&beta;-D-ribosyl)glycinamide	iN/isup2/sup-formyl-iN/isup1/sup-(5-phospho-&beta;-D-ribosyl)glycinamide [ C8 H13 N2 O9 P, tgt=25.85, overall=25.85 ]	(317.00882, 8610.087)(318.01028, 1226.1333)(319.00732, 985.4167)	2.061
iN/isup5/sup-methyl-tetrahydropteroyl mono-L-glutamate	1	1	1	1	1	1	1	1	1	1	1	1	1308137	1307940	1286998	iN/isup5/sup-methyl-tetrahydropteroyl mono-L-glutamate	iN/isup5/sup-methyl-tetrahydropteroyl mono-L-glutamate [ C20 H23 N7 O6, tgt= ]	(478.20935, 1180.4633)(457.20117, 17575.787)(458.2036, 1666.7867)	6.8735
iN/isup5/sup-phenyl-L-glutamine	1	1	1	499611	579216	483598	1	1	1	1	1	1	1	1	1	iN/isup5/sup-phenyl-L-glutamine	iN/isup5/sup-phenyl-L-glutamine [ C11 H14 N2 O3, tgt=2.43, overall=2.43 ]	(223.09673, 6328.3833)(240.14034, 5278.237)	2.92
iN/isup6/sup-acetyl-L-lysine	1	1	925723	1	1	1	1	1	1	1	1	1	1	1	1	iN/isup6/sup-acetyl-L-lysine	iN/isup6/sup-acetyl-L-lysine [ C8 H16 N2 O3, tgt=29.33, overall=29.33 ]	(189.1164, 16201.45)(175.1122, 5133.25)	2.58
iN/isup7/sup-methylguanosine	1	1	1	277045	272220	269322	397953	409758	398254	447156	456029	392612	5953103	5941673	6015029	iN/isup7/sup-methylguanosine	iN/isup7/sup-methylguanosine [ C11 H16 N5 O5, tgt=57.35, overall=57.35 ]	(282.61465, 123766.695)(281.11038, 7017.33)(283.7842, 5827.4194)(285.12173, 51282.625)(286.1265, 4911.5464)(320.16296, 2557.8132)(303.13174, 2331.2068)	4.82875
indican	1002956	1053349	992779	1	3340995	3326696	5722736	5768950	5652983	2465721	2557351	2520953	3241054	3288256	3205917	indican	indican [ C14 H17 N O6, tgt=77.04, overall=77.04 ]	(279.10345, 865.23334)(313.14133, 75363.86)(314.14575, 7777.766)	5.0755
indigo	288976	330228	319374	1	1	274830	1	1	1	2858973	2883768	2933094	5955664	5960148	6018618	indigo	indigo [ C16 H10 N2 O2, tgt=59.30, overall=59.30 ]	(263.071, 7188.5737)(281.8277, 100826.2)(283.40344, 21063.873)(285.06412, 101108.93)(286.06693, 8111.5034)	6.9481
indol-3-ylmethyl-cysteine	1	106553	1	1548089	1512315	1494283	1	1	1	16047517	16141532	15942973	1	1	1	indol-3-ylmethyl-cysteine	indol-3-ylmethyl-cysteine [ C12 H14 N2 O2 S, tgt=35.37, overall=35.37 ]	(268.1165, 4437.75)(273.0713, 565.77)(255.05412, 237179.42)(256.05698, 25557.955)(257.0599, 1386.2201)	7.43817
indol-3-ylmethyl-glutathione	1	1	1	1	1	1	1	1	1	4653577	4612534	4646103	1	1	1	indol-3-ylmethyl-glutathione	indol-3-ylmethyl-glutathione [ C19 H23 N4 O6 S, tgt= ]	(440.10928, 135031.89)(441.11182, 20757.85)(442.1094, 2195.0198)	11.611
indol-3-ylmethylisothiocyanate-glutathione	1	1	1	1	1	1	1	1	1	4510669	4446520	4456717	1	1	1	indol-3-ylmethylisothiocyanate-glutathione	indol-3-ylmethylisothiocyanate-glutathione [ C20 H24 N5 O6 S2, tgt= ]	(495.14584, 121795.305)(496.14853, 26035.674)(497.15054, 715.7166)	12.3442
indole	1	1	1	1	1	208962	1	1	1	1	1	1	1	1	1	indole	indole [ C8 H7 N, tgt= ]	(118.0593, 9644.29)(121.0779, 4150.45)	4.337
indole-3-acetohydroximoyl-glutathione	1	1	1	1	1	1	1020849	1028381	977371	1	1	1	1	1	1	indole-3-acetohydroximoyl-glutathione	indole-3-acetohydroximoyl-glutathione [ C20 H24 N5 O7 S, tgt= ]	(479.17062, 37373.87)(480.17325, 5096.277)	12.369
indole-3-acetonitrile-glutatione conjugate	1	1	1	1	1	1	1615819	1633710	1571652	158235	169748	152358	170473	174144	130104	indole-3-acetonitrile-glutatione conjugate	indole-3-acetonitrile-glutatione conjugate [ C20 H22 N5 O6 S, tgt= ]	(442.11673, 7684.3574)(443.12216, 1665.09)(479.1716, 11626.251)(480.17325, 3332.077)	12.352
indole-3-acetyl-alanine	1131076	1209977	1184623	2306983	2304040	2330311	4337879	4464802	4548422	1	1	1	1	1	5576013	indole-3-acetyl-alanine	indole-3-acetyl-alanine [ C13 H13 N2 O3, tgt=71.39, overall=71.39 ]	(249.11353, 7275.6)(263.1295, 47745.74)(264.13107, 3078.1055)(247.11961, 2911.8113)	4.23209
indole-3-acetyl-CoA	620456	670385	659990	688059	641077	647404	846666	849331	839644	760704	777206	777778	1082531	1126908	1098472	indole-3-acetyl-CoA	indole-3-acetyl-CoA [ C31 H51 N8 O17 P3 S, tgt=17.46, overall=17.46 ]	(959.21484, 1947.6659)(937.2043, 30821.748)(938.20575, 3764.5444)	23.3222
indole-3-acetyl-glutamine	1099062	1163736	1127417	1	486039	2803979	1	1	1	3370507	3306696	3353118	2593100	2568109	2610027	indole-3-acetyl-glutamine	indole-3-acetyl-glutamine [ C15 H16 N3 O4, tgt=0.46, overall=0.46 ]	(306.13177, 2656.3635)(287.10327, 2422.4)(305.33188, 1601.4501)(320.14804, 36708.043)(321.15103, 2907.25)(303.13242, 6374.915)	3.51427
indole-3-acetyl-glycine	1	1	1	1	275919	276794	1	1	1	1	1	1	1	1	1	indole-3-acetyl-glycine	indole-3-acetyl-glycine [ C12 H11 N2 O3, tgt=10.48, overall=10.48 ]	(249.1143, 7569.98)(250.1241, 2331.155)	2.71755
indole-3-acetyl-isoleucine	1	1	1	1	1	1	372364	1	361380	1	1	1	1662313	1665783	1706509	indole-3-acetyl-isoleucine	indole-3-acetyl-isoleucine [ C16 H19 N2 O3, tgt= ]	(272.1492, 3075.97)(287.15887, 18978.145)(288.1645, 87.27)(292.11703, 1628.5933)	3.566
indole-3-acetyl-leucine	1	1	1	1	1	1	372364	1	361380	1	1	1	1662313	1665783	1706509	indole-3-acetyl-leucine	indole-3-acetyl-leucine [ C16 H19 N2 O3, tgt= ]	(272.1492, 3075.97)(287.15887, 18978.145)(288.1645, 87.27)(292.11703, 1628.5933)	3.566
indole-3-acetyl-phenylalanine	1	1	1	1	1	1	1	1	1	1	1	1	213588	209000	215510	indole-3-acetyl-phenylalanine	indole-3-acetyl-phenylalanine [ C19 H17 N2 O3, tgt= ]	(306.13232, 8717.807)(321.14993, 7675.453)	4.49325
indole-3-acetyl-proline	1	1	1	1051006	1	1	908954	374758	370833	1	1	1	1	1	1	indole-3-acetyl-proline	indole-3-acetyl-proline [ C15 H15 N2 O3, tgt=47.43, overall=47.43 ]	(297.11243, 23282.018)(298.11563, 1032.4)(276.1211, 355.6)	2.662
indole-3-butyryl-glucose	278089	314024	298397	1	1	1	1	1	1	1	1	1	1	1	1	indole-3-butyryl-glucose	indole-3-butyryl-glucose [ C18 H23 N O7, tgt= ]	(371.1783, 175.83333)(350.1575, 1415.6367)(351.1624, 127.02)(365.1775, 7194.9634)(366.1953, 372.25)	5.77975
indole-3-carboxaldehyde	355957	377436	352721	504116	477929	489794	504513	518310	524257	432036	432244	407891	403190	415685	395140	indole-3-carboxaldehyde	indole-3-carboxaldehyde [ C9 H7 N O, tgt=88.62, overall=88.62 ]	(168.04353, 24971.963)(169.04465, 1698.5535)(170.04137, 610.2955)(151.03026, 152568.56)	2.0036
indoleacrylate	1	1	1	1	311382	1149727	1	1	1	1	1	1	1	1	1	indoleacrylate	indoleacrylate [ C11 H9 N O2, tgt= ]	(188.06131, 33274.688)(170.05124, 2678.835)	4.21786
inosine	1	1	1	1	1	1	1	1	1	1	1	1	12696404	12721595	12833544	inosine	inosine [ C10 H12 N4 O5, tgt= ]	(251.08203, 354110.47)(252.08484, 34928.754)(253.08636, 799.1167)	6.76157
iNsup2/sup/i-acetyl-L-Lysine	1	1	925723	1	1	1	1	1	1	1	1	1	1	1	1	iNsup2/sup/i-acetyl-L-Lysine	iNsup2/sup/i-acetyl-L-Lysine [ C8 H16 N2 O3, tgt=29.33, overall=29.33 ]	(189.1164, 16201.45)(175.1122, 5133.25)	2.58
iO/i-acetyl-L-serine	290174	311673	294115	344513	327013	340726	344536	327613	352407	340839	356569	345994	277435	306703	305430	iO/i-acetyl-L-serine	iO/i-acetyl-L-serine [ C5 H9 N O4, tgt=26.86, overall=26.86 ]	(130.04419, 1279.8425)(169.0912, 1690.485)(170.04137, 572.3661)(152.03055, 15462.152)(153.02676, 11304.948)	2.005
iO/i-sinapoylcholine	149824	164878	159066	492475	503636	463704	1	1	1	987921	1005141	1003248	1	1	1	iO/i-sinapoylcholine	iO/i-sinapoylcholine [ C16 H24 N O5, tgt=61.96, overall=61.96 ]	(314.17563, 1256.4135)(312.67294, 12415.384)(312.16788, 794.54004)(298.18185, 1000.69995)(330.20435, 4569.6724)(334.15994, 60936.22)(335.16232, 5496.77)	4.5114
io/i-topolin	3263397	3444271	1982297	6189064	6173871	6175621	902416	940101	861851	8011026	8167883	8158383	491003	491576	161894	io/i-topolin	io/i-topolin [ C12 H13 N5 O, tgt=69.45, overall=69.45 ]	(245.62048, 3181.1882)(248.1162, 295.64)(244.12146, 11576.569)(245.11841, 3338.0032)(261.84015, 87609.05)(262.1509, 16989.158)(246.13658, 21472.527)(269.1034, 2958.42)(253.10881, 16124.379)	4.7234
ip/i-aminobenzoyl glutamate	1	120499	125620	1	1	1	1	1	1	1	1	1	1	1	1	ip/i-aminobenzoyl glutamate	ip/i-aminobenzoyl glutamate [ C12 H12 N2 O5, tgt=1.05, overall=1.05 ]	(264.06744, 7832.11)(269.1034, 325.87)(273.0713, 792.08)	2.078
Ip/I-cumic alcohol	1	959772	951568	1	1	1	1	1	1	1	1	1	1	1	1	Ip/I-cumic alcohol	Ip/I-cumic alcohol [ C10 H14 O, tgt= ]	(132.0967, 10475.06)(133.09595, 895.05005)	2.58386
iR/i-(-)-carvone	1	959772	951568	1	1	1	1	1	1	1	1	1	1	1	1	iR/i-(-)-carvone	iR/i-(-)-carvone [ C10 H14 O, tgt= ]	(132.0967, 10475.06)(133.09595, 895.05005)	2.58386
iS/i-(+)-carvone	1	959772	951568	1	1	1	1	1	1	1	1	1	1	1	1	iS/i-(+)-carvone	iS/i-(+)-carvone [ C10 H14 O, tgt= ]	(132.0967, 10475.06)(133.09595, 895.05005)	2.58386
iS/i-(2-aminoethyl)-L-cysteine	1308457	1406650	1347953	1737467	891719	1677619	1	375653	1	631144	644588	445107	394199	410868	410377	iS/i-(2-aminoethyl)-L-cysteine	iS/i-(2-aminoethyl)-L-cysteine [ C5 H13 N2 O2 S, tgt=46.12, overall=46.12 ]	(166.07864, 6440.787)(187.09952, 7358.1123)(188.06187, 13205.303)(170.05116, 1143.3033)	4.01229
iS/i-(2iE/i,6iE/i)-farnesyl-L-cysteine	492390	525733	505170	603615	593404	608428	237021	232450	1	463022	472518	245602	251912	268970	245129	iS/i-(2iE/i,6iE/i)-farnesyl-L-cysteine	iS/i-(2iE/i,6iE/i)-farnesyl-L-cysteine [ C18 H31 N O2 S, tgt=52.35, overall=52.35 ]	(329.3271, 5134.4155)(344.23624, 254.93001)(330.2254, 9353.503)(348.20535, 6981.1846)(330.18793, 8911.86)	3.31493
iS/i-adenosyl 3-(methylthio)propylamine	1	120263	91787	1877642	1854473	1260265	314686	325114	293095	566133	565627	540166	1	1	1	iS/i-adenosyl 3-(methylthio)propylamine	iS/i-adenosyl 3-(methylthio)propylamine [ C14 H24 N6 O3 S, tgt=48.67, overall=48.67 ]	(358.159, 1297.6399)(357.1669, 3446.3499)(341.16656, 1173.4066)(379.00183, 1526.307)(380.20056, 133203.33)(361.51834, 961.3411)(362.19058, 3142.5781)(380.1653, 1808.0267)	4.37675
iS/i-adenosyl-L-methionine	1	1	1	710315	664394	640387	1	1	1	1	1	1	1	1	1	iS/i-adenosyl-L-methionine	iS/i-adenosyl-L-methionine [ C15 H23 N6 O5 S, tgt=18.29, overall=18.29 ]	(399.16208, 27438.955)(400.16507, 1116.8567)	11.0582
iS/i-methyl-5'-thioadenosine	1	1	1	1	1295182	1305496	1474606	1557116	1523517	1	1	1	1	1	1	iS/i-methyl-5'-thioadenosine	iS/i-methyl-5'-thioadenosine [ C11 H15 N5 O3 S, tgt=58.74, overall=58.74 ]	(297.1125, 30885.281)(298.1154, 722.328)	6.10262
iS/i-methyl-5'-thioinosine	1	1	1	1	1	1	1492152	1482834	1389209	1	1	1	1	1	1	iS/i-methyl-5'-thioinosine	iS/i-methyl-5'-thioinosine [ C11 H14 N4 O4 S, tgt= ]	(316.11435, 27660.078)(317.11722, 747.5867)	5.196
isn/i-1,2-di(2-propylpentanoyl)glycerol	972453	998081	998302	1	1	1	947088	932208	909719	1	1	1	1	1	1	isn/i-1,2-di(2-propylpentanoyl)glycerol	isn/i-1,2-di(2-propylpentanoyl)glycerol [ C19 H36 O5, tgt= ]	(367.25195, 42692.766)(368.254, 4266.2466)(349.23453, 26979.975)(350.2368, 2124.3633)	6.75725
isn/i-1-ilyso/i-2-16:0-monogalactosyldiacylglycerol	1	1	1	1340490	1397398	936817	413898	1	1	573784	568866	616954	808901	758396	788645	isn/i-1-ilyso/i-2-16:0-monogalactosyldiacylglycerol	isn/i-1-ilyso/i-2-16:0-monogalactosyldiacylglycerol [ C25 H48 O9, tgt=70.45, overall=70.45 ]	(511.36746, 18551.951)(512.37067, 2112.4375)(494.35263, 4909.4565)(498.31323, 26429.18)(499.31552, 2120.6167)(500.32285, 622.70667)	12.8059
isn/i-2-C16:0-DCA-LPA	1	1	1	207964	205807	209725	1	1	1	1	1	1	141352	133445	137124	isn/i-2-C16:0-DCA-LPA	isn/i-2-C16:0-DCA-LPA [ C19 H34 O9 P, tgt=45.91, overall=45.91 ]	(423.20248, 1599.7633)(441.2042, 12479.891)(455.22046, 6770.027)(437.21683, 7782.127)	4.315
isn/i-glycero-3-phosphocholine	937248	997462	970253	1304956	1638419	1717010	654733	801543	781614	2512367	2477216	2469110	2065062	2046461	2073798	isn/i-glycero-3-phosphocholine	isn/i-glycero-3-phosphocholine [ C8 H20 N O6 P, tgt=29.10, overall=29.10 ]	(258.0993, 28245.406)(263.12976, 79798.555)(260.1342, 8649.548)(261.73813, 2771.374)(281.1014, 678.62994)	2.6306
isobutanoyl-CoA	289414	321378	325831	210366	198988	217933	304948	304072	312872	280897	280394	274236	331411	341742	330520	isobutanoyl-CoA	isobutanoyl-CoA [ C25 H38 N7 O17 P3 S, tgt=30.24, overall=30.24 ]	(836.12866, 919.2912)(821.12665, 91900.29)(822.12805, 10399.183)(851.1474, 11695.011)(836.12976, 1189.09)(841.1284, 2357.3591)(843.1338, 10360.209)	23.0536
isoliquiritigenin 4'-glucoside	1	1	1	1	1	1	1	1	1	659182	663652	676162	1	544875	547831	isoliquiritigenin 4'-glucoside	isoliquiritigenin 4'-glucoside [ C21 H22 O9, tgt= ]	(401.107, 29559.34)(402.10968, 2247.1948)(441.11182, 23765.977)(442.1094, 2546.1733)	9.35214
isolychnose	4445448	4544488	4374094	1	1	1	1	1	1	1	1	1	1	1	1	isolychnose	isolychnose [ C24 H42 O21, tgt= ]	(667.26715, 108654.96)(668.2696, 26087.703)(669.2715, 1920.0668)	5.6596
isopentenyl adenosine	1336681	1413099	1343239	19995992	19704720	19529424	1186641	1279739	1141540	2757058	2879164	2878968	2851620	3822579	2982554	isopentenyl adenosine	isopentenyl adenosine [ C15 H21 N5 O4, tgt=40.69, overall=40.69 ]	(339.17706, 713.64996)(336.17572, 53564.35)(337.17813, 10235.058)(321.16953, 8328.347)(322.1694, 427.95)(356.2017, 5401.8887)(336.1779, 18414.053)(337.17987, 185.1)(359.1527, 162.38)	5.2234
isopentenyl diphosphate	382657	436305	384288	880219	861154	819024	922541	947195	965828	728679	725812	742515	708483	727619	372474	isopentenyl diphosphate	isopentenyl diphosphate [ C5 H9 O7 P2, tgt=59.45, overall=59.45 ]	(225.97932, 26611.625)(226.98026, 1545.8014)(243.987, 1238.3375)(225.97784, 30971.844)(226.97842, 2044.1588)	1.9988
isopentenyl phosphate	1	1	1	1247346	1	1	1	1	1	1	1	1	1	1	1	isopentenyl phosphate	isopentenyl phosphate [ C5 H9 O4 P, tgt=43.82, overall=43.82 ]	(147.0161, 10755.47)(151.0281, 4105.78)(168.0426, 708.29)(169.0435, 49.71)	0.113
isopentenyladenine-7-iN/i-glucoside	1	1	1	1	1	1	1	322572	1	1713760	1711363	1669047	1	1	1	isopentenyladenine-7-iN/i-glucoside	isopentenyladenine-7-iN/i-glucoside [ C16H23N5O5, tgt= ]	(349.1642, 3248.1924)(352.17142, 3919.3098)(352.1717, 11778.52)(385.20724, 2469.0166)(387.2067, 1312.0067)(366.19028, 12925.065)	3.02115
isopentenyladenine-9-iN/i-glucoside	283610	324696	1	1517500	1531406	1563458	2147719	322572	1063280	1713760	1711363	1669047	786452	784442	776611	isopentenyladenine-9-iN/i-glucoside	isopentenyladenine-9-iN/i-glucoside [ C16 H23 N5 O5, tgt=7.56, overall=7.56 ]	(365.1773, 6944.955)(350.1613, 3321.8755)(352.0699, 2325.0862)(366.1843, 19395.99)(367.18677, 197.555)(352.1717, 11778.52)(385.20724, 2469.0166)(387.2067, 1312.0067)(366.18948, 14924.193)(367.1877, 4501.56)(390.67514, 644.25)	3.74357
isopimaradienal	1	1	1	143126	1	1	1	1	1	1	1	1	1	1	1	isopimaradienal	isopimaradienal [ C20 H30 O, tgt=45.81, overall=45.81 ]	(309.2098, 8821.06)(292.2124, 319.25)	9.12
isorhamnetin 3-iO/i-(3\-iO/i-ip/i-coumaroyl)-glucoside	1	1	1	1	1	1	1	1	1	1946014	1908831	1908847	1	1	1	isorhamnetin 3-iO/i-(3\-iO/i-ip/i-coumaroyl)-glucoside	isorhamnetin 3-iO/i-(3\-iO/i-ip/i-coumaroyl)-glucoside [ C31 H28 O14, tgt= ]	(626.18036, 61397.08)(627.1828, 14828.823)(628.18207, 1180.1666)	12.539
isorhamnetin 3-iO/i-(4\-iO/i-ip/i-coumaroyl)-glucoside	1	1	1	1	1	1	1	1	1	1946014	1908831	1908847	1	1	1	isorhamnetin 3-iO/i-(4\-iO/i-ip/i-coumaroyl)-glucoside	isorhamnetin 3-iO/i-(4\-iO/i-ip/i-coumaroyl)-glucoside [ C31 H28 O14, tgt= ]	(626.18036, 61397.08)(627.1828, 14828.823)(628.18207, 1180.1666)	12.539
isorhamnetin 3-iO/i-(6\-iO/i-feruloyl)-glucoside	1	1	1	1	1	1	1	1	1	1	1	1	162325	151716	156709	isorhamnetin 3-iO/i-(6\-iO/i-feruloyl)-glucoside	isorhamnetin 3-iO/i-(6\-iO/i-feruloyl)-glucoside [ C32 H30 O15, tgt= ]	(677.1438, 7371.69)(663.1382, 8264.403)	18.738
isorhamnetin 3-iO/i-(6\-iO/i-ip/i-coumaroyl)-glucoside	1	1	1	1	1	1	1	1	1	1946014	1908831	1908847	1	1	1	isorhamnetin 3-iO/i-(6\-iO/i-ip/i-coumaroyl)-glucoside	isorhamnetin 3-iO/i-(6\-iO/i-ip/i-coumaroyl)-glucoside [ C31 H28 O14, tgt= ]	(626.18036, 61397.08)(627.1828, 14828.823)(628.18207, 1180.1666)	12.539
isorhamnetin 3-iO/i-glucoside	1	1	1	1	1	1	1	1	1	749110	738730	746113	1	1	1	isorhamnetin 3-iO/i-glucoside	isorhamnetin 3-iO/i-glucoside [ C22 H22 O12, tgt= ]	(496.14853, 28323.938)(497.15054, 790.24335)	12.322
isovaleryl-CoA	975626	956901	1060678	963076	923417	896223	1055102	919457	1040527	1006945	241178	100829	1119006	1145641	1110827	isovaleryl-CoA	isovaleryl-CoA [ C26 H40 N7 O17 P3 S, tgt=43.77, overall=43.77 ]	(850.29034, 24413.436)(851.147, 5065.9517)(852.1262, 1686.4883)(853.1279, 296.585)(829.1219, 4305.41)(850.1436, 27820.95)(851.141, 4789.5425)(836.1302, 15457.846)(865.1528, 11683.113)(866.1512, 1076.3516)(871.2964, 2570.411)(853.12335, 887.57495)	22.5706
isovitexin-7-O-glucosyl-2''O-rhamnoside	1	1	1	1	1	1	1	1	1	1	1	1	375281	367796	364741	isovitexin-7-O-glucosyl-2''O-rhamnoside	isovitexin-7-O-glucosyl-2''O-rhamnoside [ C33 H40 O19, tgt= ]	(769.20435, 1920.9901)(750.1923, 1553.8365)	19.3594
isozeaxanthin	1	1	1	1	1	1	1	1	1	3136385	3131026	3224160	1	1	1	isozeaxanthin	isozeaxanthin [ C40 H56 O2, tgt= ]	(570.43353, 63812.293)(571.4363, 11921.7)(578.4111, 1320.6766)	15.4336
isyn/i-copalyl diphosphate	547917	612029	537243	231841	227160	229697	1544967	1540515	1502937	595298	550881	1	756656	756748	734318	isyn/i-copalyl diphosphate	isyn/i-copalyl diphosphate [ C20 H36 O7 P2, tgt=13.34, overall=13.34 ]	(451.1996, 24316.057)(452.20016, 3491.8665)(433.20074, 6985.0063)(472.03473, 907.6821)(450.6743, 7933.5327)(452.21362, 422.98337)(478.21042, 353.36337)	5.43371
it/i-anethole	7782224	7952921	1	1	1	1	1	1	1	1	1	1	1	1	1	it/i-anethole	it/i-anethole [ C10 H12 O, tgt=45.49, overall=45.49 ]	(134.0907, 2219.38)(136.10635, 4032.06)	4.287
itaconate	13368353	14011639	8821788	13950722	13754451	13766840	14500312	14907253	15176394	13340369	13527496	13263799	12968991	13144306	13169548	itaconate	itaconate [ C5 H4 O4, tgt=58.66, overall=58.66 ]	(128.74884, 48875.54)(129.72716, 12102.336)(130.01068, 9853.033)(111.00481, 62298.312)(112.0012, 59641.28)(111.00583, 59833.1)(112.001945, 56804.17)(154.00682, 3226.5205)(155.0055, 287.26)(133.99506, 1536.8275)	2.0122
ithreo/i-guaiacylglycerol-&beta;-guaiacyl ether	974103	1005399	965363	1030920	991746	973255	243736	237416	228062	1	1	1	1	1	1	ithreo/i-guaiacylglycerol-&beta;-guaiacyl ether	ithreo/i-guaiacylglycerol-&beta;-guaiacyl ether [ C17 H20 O6, tgt=31.84, overall=31.84 ]	(303.13113, 13215.208)(304.13272, 2806.2634)(338.16602, 4214.0366)(320.14832, 31787.502)(321.1522, 2046.1)	2.7742
itrans/i-1,2-dihydrobenzene-1,2-diol	662556	715667	839496	1	1	1	1	1	1	1	1	1	1	1	1	itrans/i-1,2-dihydrobenzene-1,2-diol	itrans/i-1,2-dihydrobenzene-1,2-diol [ C6 H8 O2, tgt=46.72, overall=46.72 ]	(116.0662, 1404.6635)(138.04926, 2876.0867)	2.297
itrans/i-abscisic alcohol	86414992	88317744	86836488	265451	249109	243583	1	1	1	1	1	1	1	1	1	itrans/i-abscisic alcohol	itrans/i-abscisic alcohol [ C15 H22 O3, tgt=18.93, overall=18.93 ]	(251.16634, 232.58)(274.64807, 2793.7537)(255.13257, 10689.946)	2.6174
itrans/i-caffeate	1098067	1185853	1197950	1	1	1	1045405	1087842	1078573	1	1	1	462505	473007	447480	itrans/i-caffeate	itrans/i-caffeate [ C9 H7 O4, tgt=73.41, overall=73.41 ]	(183.04347, 2190.0984)(161.02287, 26742.764)(162.02422, 1221.4618)(163.02037, 771.74506)(165.043, 337.85)	2.223
itrans/i-cinnamate	1	1	1	1	1	340726	1	1	1	340839	326560	311703	149021	1	1	itrans/i-cinnamate	itrans/i-cinnamate [ C9 H7 O2, tgt=43.85, overall=43.85 ]	(130.04424, 1033.146)(153.0267, 8294.27)	2.0706
itrans/i-cinnamoyl-&beta;-D-glucoside	1461545	1492079	1444795	1132091	1083431	1064675	370339	371891	336274	264679	276374	283958	169632	168676	173885	itrans/i-cinnamoyl-&beta;-D-glucoside	itrans/i-cinnamoyl-&beta;-D-glucoside [ C15 H18 O7, tgt=16.47, overall=16.47 ]	(311.1253, 21232.914)(312.73572, 8123.854)(313.47467, 4081.841)	5.5682
itrans/i-hex-2-enoyl-CoA	517120	549804	561415	522266	1	489340	576366	550941	550188	519133	512163	532341	619298	630506	603923	itrans/i-hex-2-enoyl-CoA	itrans/i-hex-2-enoyl-CoA [ C27 H40 N7 O17 P3 S, tgt=26.21, overall=26.21 ]	(865.14935, 9069.818)(841.1299, 1962.7777)(843.1375, 12015.773)(879.1655, 17613.566)(880.16595, 2410.5579)(887.1597, 2309.1702)(870.15137, 240.32501)	22.9068
itrans/i-neoxanthin	1	1	1	1	1	1	1395278	1385964	1393240	1	1	1	1110413	1115783	1110582	itrans/i-neoxanthin	itrans/i-neoxanthin [ C40H56O4, tgt= ]	(602.42145, 60223.89)(603.4242, 11368.238)	11.2642
itrans/i-oct-2-enoyl-CoA	88815	106805	111290	108158	104903	92140	122619	107640	108050	107136	94528	104574	156085	183120	178295	itrans/i-oct-2-enoyl-CoA	itrans/i-oct-2-enoyl-CoA [ C29 H44 N7 O17 P3 S, tgt=31.95, overall=31.95 ]	(887.1606, 3339.7998)(870.65155, 1276.93)(872.1587, 8188.3735)(894.1699, 7165.8716)(872.15643, 3906.0674)(908.18726, 26859.096)(909.18854, 3971.6335)(914.6756, 740.95337)(894.1672, 7691.263)	22.8722
itrans/i-zeatin	1300222	1425285	1390608	1	1	1	1	1	1	2509472	2602995	2756395	1804009	1865167	1826998	itrans/i-zeatin	itrans/i-zeatin [ C10 H13 N5 O, tgt= ]	(246.11143, 2739.67)(247.119, 9015.113)(205.1104, 1098.2234)	2.542
itrans/i-zeatin-iO/i-glucoside	1	1	1	1	1	1	3377956	950488	915109	1	1	1	1	1	1	itrans/i-zeatin-iO/i-glucoside	itrans/i-zeatin-iO/i-glucoside [ C16 H23 N5 O6, tgt=5.96, overall=5.96 ]	(367.16278, 1881.665)(403.214, 153.04)(404.2024, 1500.46)	5.41475
itrans/i-zeatin-iO/i-glucoside-7-iN/i-glucoside	529663	572680	543231	2273341	2278075	2302451	1	1	1	14876835	15130181	14671218	1	1	1	itrans/i-zeatin-iO/i-glucoside-7-iN/i-glucoside	itrans/i-zeatin-iO/i-glucoside-7-iN/i-glucoside [ C22 H33 N5 O11, tgt=64.28, overall=64.28 ]	(562.2574, 203526.38)(563.26, 54189.64)(564.26697, 9853.957)(544.2524, 4337.353)(547.2416, 282.03)	6.0316
jasmonoyl-CoA	620456	670385	659988	688059	641077	647404	846666	849331	839644	760704	777206	777778	1082531	1126908	1098472	jasmonoyl-CoA	jasmonoyl-CoA [ C33 H48 N7 O18 P3 S, tgt=26.60, overall=26.60 ]	(959.21484, 1947.6659)(937.2043, 30821.748)(938.20575, 3764.5444)	23.3222
justicidin B	786725	834521	796577	1	1	1	1	1	1	1	1	1	1	1	1	justicidin B	justicidin B [ C21 H16 O6, tgt= ]	(365.09195, 38056.75)(366.09497, 1313.71)	2.18325
juvenile hormone III	534926912	541383100	533168672	1	1	1	1	1	1	1	1	1	1	1	1	juvenile hormone III	juvenile hormone III [ C16 H26 O3, tgt= ]	(266.18405, 4977.09)(267.19263, 355.95337)(248.17456, 81376.32)(249.1875, 5345228.0)(250.19057, 900895.75)(251.19316, 62456.05)	2.71838
kaempferol	1	1	1	1	1	1	1	1	1	2859638	2884991	2933708	1	1	1	kaempferol	kaempferol [ C15 H9 O6, tgt= ]	(285.06412, 101108.93)(286.06693, 8111.5034)	8.37675
kaempferol 3-iO/i-&beta;-iD/i-glucosyl-(1-2)-glucoside	1	1	1	1	1	1	1	1	1	503481	492797	464810	1	1	1	kaempferol 3-iO/i-&beta;-iD/i-glucosyl-(1-2)-glucoside	kaempferol 3-iO/i-&beta;-iD/i-glucosyl-(1-2)-glucoside [ C27 H29 O16, tgt= ]	(627.1828, 18136.623)(628.18207, 1453.5067)	13.3645
kaempferol 3-iO/i-&beta;-iD/i-glucosyl-(1-2)-glucosyl-(1-2)-&beta;-iD/i-glucoside	1	1	1	1	1	1	1	1	1	1	1	1	179960	181841	179645	kaempferol 3-iO/i-&beta;-iD/i-glucosyl-(1-2)-glucosyl-(1-2)-&beta;-iD/i-glucoside	kaempferol 3-iO/i-&beta;-iD/i-glucosyl-(1-2)-glucosyl-(1-2)-&beta;-iD/i-glucoside [ C33 H40 O21, tgt= ]	(755.1982, 3008.9133)(759.2016, 7519.867)(760.2039, 2062.9202)(774.21045, 4025.91)(779.2163, 1725.7933)	19.49
kaempferol 3-iO/i-&beta;-iD/i-glucosylgalactoside	1	1	1	1	1	1	1	1	1	503481	492797	464810	1	1	1	kaempferol 3-iO/i-&beta;-iD/i-glucosylgalactoside	kaempferol 3-iO/i-&beta;-iD/i-glucosylgalactoside [ C27 H29 O16, tgt= ]	(627.1828, 18136.623)(628.18207, 1453.5067)	12.539
kaempferol 3-iO/i-(3\,6\	256930	290125	305368	204954	198748	190649	578483	588706	562479	1	1	1	967243	946775	936332	kaempferol 3-iO/i-(3\,6\	kaempferol 3-iO/i-(3\,6\ [ C39 H32 O15, tgt=0.13, overall=0.13 ]	(722.16205, 197.38)(759.19977, 3970.89)(760.2039, 2005.7467)(740.18823, 8150.345)(750.18866, 235.825)	19.356
kaempferol 3-iO/i-(4\,6\	256930	290125	305368	204954	198748	190649	578483	588706	562479	1	1	1	967243	946775	936332	kaempferol 3-iO/i-(4\,6\	kaempferol 3-iO/i-(4\,6\ [ C39 H32 O15, tgt=0.13, overall=0.13 ]	(722.16205, 197.38)(759.19977, 3970.89)(760.2039, 2005.7467)(740.18823, 8150.345)(750.18866, 235.825)	19.356
kaempferol 3-iO/i-(6\-iO/i-feruloyl)-glucoside	1	1	1	1	1	1	1	1	1	1946014	1908831	1908847	1	1	1	kaempferol 3-iO/i-(6\-iO/i-feruloyl)-glucoside	kaempferol 3-iO/i-(6\-iO/i-feruloyl)-glucoside [ C31 H28 O14, tgt= ]	(626.18036, 61397.08)(627.1828, 14828.823)(628.18207, 1180.1666)	12.539
kaempferol 3-iO/i-rhamnosyl(1-2)glucoside-7-iO/i-rhamnoside	1	128752	151698	1	1	1	244955	286893	267388	1	1	1	623084	616657	609382	kaempferol 3-iO/i-rhamnosyl(1-2)glucoside-7-iO/i-rhamnoside	kaempferol 3-iO/i-rhamnosyl(1-2)glucoside-7-iO/i-rhamnoside [ C33 H40 O20, tgt= ]	(759.2011, 4219.455)(760.2039, 1504.9733)(740.1865, 10475.547)(740.19116, 7974.618)(779.2179, 2723.5083)	19.4188
kaempferol-3-O-gentiobioside-7-O-rhamnoside	1	128752	151698	1	1	1	244955	286893	267388	1	1	1	623084	616657	609382	kaempferol-3-O-gentiobioside-7-O-rhamnoside	kaempferol-3-O-gentiobioside-7-O-rhamnoside [ C33 H40 O20, tgt= ]	(759.2011, 4219.455)(760.2039, 1504.9733)(740.1865, 10475.547)(740.19116, 7974.618)(779.2179, 2723.5083)	19.4188
kanamycin B	466663	452154	422680	8421394	8443402	8535729	163257	166178	157563	460846	826426	801077	1107221	1370148	1436436	kanamycin B	kanamycin B [ C18 H42 N5 O10, tgt=47.10, overall=47.10 ]	(489.28656, 22511.414)(490.28937, 2756.4536)(491.30173, 11244.594)(492.30405, 1109.0701)(471.2806, 77741.63)(471.27573, 27213.828)(472.28226, 2796.0898)(473.27148, 185.52)(491.29974, 59373.934)(492.30234, 9146.534)(513.842, 1821.4556)(513.27734, 21308.062)(514.279, 3133.13)(493.27472, 2201.9248)	7.0576
kauralexin A1	1	1	1	1470839	1455199	1432913	363756	1	355705	1	1	1	1	1	1	kauralexin A1	kauralexin A1 [ C20 H31 O2, tgt=34.31, overall=34.31 ]	(308.20776, 52493.49)(309.21042, 4378.3896)	7.88136
kauralexin A2	484259	517871	496739	713234	707738	3802833	450542	466150	1	1190783	3559405	3474887	2059485	408773	2042246	kauralexin A2	kauralexin A2 [ C20 H28 O4, tgt=47.09, overall=47.09 ]	(332.20297, 15055.452)(333.2064, 124.55)(333.2056, 42.02)(316.408, 36609.426)(317.20697, 8286.8955)(359.04382, 5879.1357)(360.19662, 34318.605)(340.18488, 4605.012)	3.94
kauralexin A3	125839	4587953	130800	1	1	1	1	1	1	1	1	1	1	1	881940	kauralexin A3	kauralexin A3 [ C20H29O3, tgt= ]	(317.2163, 4459.23)(318.47882, 7236.462)(335.241, 679.38)(320.24435, 34844.85)(321.24765, 3595.0066)	13.8488
kauralexin B2	492390	525733	505170	3570329	3540361	3609929	576518	178765	168388	255114	1	261354	1	1	1	kauralexin B2	kauralexin B2 [ C20 H26 O4, tgt=47.52, overall=47.52 ]	(330.18787, 7210.793)(331.18326, 235.06201)(316.17795, 657.22)(332.202, 17249.639)(318.1878, 6214.541)(332.2041, 13583.588)(355.6853, 4624.0776)(336.36478, 2040.044)	3.281
kauralexin B3	1	1	1	592515	1	324416	797689	852817	874012	1575979	1605344	1597635	639362	719940	636872	kauralexin B3	kauralexin B3 [ C20 H27 O3, tgt=12.44, overall=12.44 ]	(297.183, 42860.812)(298.1818, 1346.2567)(316.21103, 25769.158)(317.2144, 1007.5683)(318.22644, 10463.032)(320.24188, 4810.3496)	11.6253
kinetin-7-iN/i-glucoside	1	1	1	1	1	1	189276	206819	186808	1	1	1	1	1	1	kinetin-7-iN/i-glucoside	kinetin-7-iN/i-glucoside [ C16 H19 N5 O6, tgt= ]	(399.18442, 12135.633)(400.18762, 981.92)	5.446
kinetin-9-iN/i-glucoside	1	1	1	1	1	1	189276	206819	186808	1	1	1	1	1	1	kinetin-9-iN/i-glucoside	kinetin-9-iN/i-glucoside [ C16 H19 N5 O6, tgt= ]	(399.18442, 12135.633)(400.18762, 981.92)	5.446
L-&beta;-phenylalanine	1	1	1	1	1	1	1	1	1	2180118	2155583	2071979	1	1	1	L-&beta;-phenylalanine	L-&beta;-phenylalanine [ C9H11NO2, tgt= ]	(166.07869, 9554.236)(185.12013, 87.23)	2.845
L-2,3-dihydrodipicolinate	2915074	2964618	2950304	3265454	3097734	2948693	3135809	3110285	3251643	2811174	3026959	2974563	2785718	2790744	2964076	L-2,3-dihydrodipicolinate	L-2,3-dihydrodipicolinate [ C7 H7 N O4, tgt=65.15, overall=65.15 ]	(170.0401, 611.83)(151.02937, 141167.84)(152.03055, 15982.922)(153.02676, 11647.928)(170.04147, 578.32996)	2.005
L-2-aminoadipate	88085	92616	93788	1	1	1	1	1	1	1	1	1	1	1	1	L-2-aminoadipate	L-2-aminoadipate [ C6 H10 N O4, tgt=55.33, overall=55.33 ]	(168.04439, 23476.502)(169.0456, 1753.0801)	2.092
labd-13-en-8&alpha;-,15 diol	7228984	7356615	7582837	1087071	1056789	1064433	2915778	2958506	2719671	1	1	1	3868519	3824684	3899992	labd-13-en-8&alpha;-,15 diol	labd-13-en-8&alpha;-,15 diol [ C20 H38 O2, tgt=16.18, overall=16.18 ]	(310.54636, 30371.26)(311.2983, 3028.64)(296.28354, 1194.0433)(311.3013, 20374.639)(298.29764, 2705.6318)	17.7918
lacinilene C	3063516	3294693	3404707	3020989	2828904	2831560	1268830	1300490	1302491	2499012	2553216	2585264	1121331	1140137	1173060	lacinilene C	lacinilene C [ C15 H18 O3, tgt=47.41, overall=47.41 ]	(249.53783, 3507.1028)(251.13907, 6465.245)(249.42355, 3259.7)(233.13876, 63240.01)(234.14224, 2739.6587)(248.48247, 1386.7567)(253.10942, 15676.129)	2.458
lactoyl-CoA	488992	519410	515110	1425878	1383975	1324121	1548612	1497232	1506590	1472142	1480115	1497463	1543810	1557690	546285	lactoyl-CoA	lactoyl-CoA [ C24 H36 N7 O18 P3 S, tgt=32.34, overall=32.34 ]	(822.26587, 2678.6277)(836.13403, 13096.403)(821.6295, 29451.596)(822.6179, 4931.335)(823.60596, 1762.985)(858.14136, 3373.2664)(836.1292, 29207.727)(837.1277, 4196.5684)	22.5148
lactucaxanthin	1	1	1	1	1	1	1	1	1	3136385	3131026	3224160	1	1	1	lactucaxanthin	lactucaxanthin [ C40 H56 O2, tgt= ]	(570.43353, 63812.293)(571.4363, 11921.7)(578.4111, 1320.6766)	15.4336
[truncated: 439 more rows]
